# Supplementary material for: Cross-dehydrogenative coupling enables enantioselective access to CF3-substituted all-carbon quaternary stereocenters
Source: Royal Society of Chemistry journal article supplement (doi:10.1039/c9sc05894j), 2020-01-01
Supplement: c9sc05894j1.pdf [file c9sc05894j1.pdf]

## Supporting Information

### **Cross-Dehydrogenative Coupling Enables Enantioselective Access to CF<sub>3</sub>-Substituted All-Carbon Quaternary Stereocenters**

Xiaoguang Pan, Zehua Wang, Linglong Kan, Ying Mao, Yasheng Zhu, and Lei Liu\*

## Table of contents

|                                                   |             |
|---------------------------------------------------|-------------|
| <b>Table of contents</b> .....                    | <b>S1</b>   |
| <b>General information</b> .....                  | <b>S2</b>   |
| <b>Substrate preparation</b> .....                | <b>S3</b>   |
| <b>General procedure</b> .....                    | <b>S13</b>  |
| <b>Absolute configuration determination</b> ..... | <b>S32</b>  |
| <b>Synthetic application</b> .....                | <b>S37</b>  |
| <b>Mechanistic studies</b> .....                  | <b>S39</b>  |
| <b>References</b> .....                           | <b>S42</b>  |
| <b>NMR spectra</b> .....                          | <b>S43</b>  |
| <b>HPLC spectra for ee determination</b> .....    | <b>S143</b> |

## General information

Proton ( $^1\text{H}$  NMR) nuclear magnetic resonance spectra were recorded at 500 or 600 MHz respectively. Carbon ( $^{13}\text{C}$  NMR) nuclear magnetic resonance spectra were recorded at 126 or 151 MHz respectively. Fluorine ( $^{19}\text{F}$  NMR) nuclear magnetic resonance spectra were recorded at 471 MHz respectively. The chemical shifts are given in parts per million (ppm) on the delta ( $\delta$ ) scale. The solvent peak was used as a reference value, for  $^1\text{H}$  NMR:  $\text{CDCl}_3 = 7.26$  ppm,  $(\text{CD}_3)_2\text{SO} = 2.50$  ppm,  $\text{CD}_3\text{OD} = 3.31$  ppm,  $\text{C}_6\text{D}_6 = 7.16$  ppm; for  $^{13}\text{C}$  NMR:  $\text{CDCl}_3 = 77.23$  ppm,  $(\text{CD}_3)_2\text{SO} = 39.51$  ppm,  $\text{CD}_3\text{OD} = 49.0$  ppm,  $\text{C}_6\text{D}_6 = 128.06$  ppm. Analytical TLC was performed on precoated silica gel GF254 plates. Column chromatography was carried out on silica gel (200–300 mesh). HRMS were carried out on an Orbitrap analyzer. UV spectra were obtained with an Agilent 8453E UV-Visible spectroscopy system. CD spectra were obtained on a Chirascan spectropolarimeter. Optical rotations were measured using a 2.5mL cell with a 10 cm path length on Hanon P850 Automatic Polarimeter and concentrations (c) were reported in  $\text{g}\times(100\text{ mL})^{-1}$ . Enantiometric excesses were determined by HPLC using a Daicel Chiralpak and Chiralcel column with hexane/*i*-PrOH as the eluent on Dionex instrument.

## Substrate Preparation

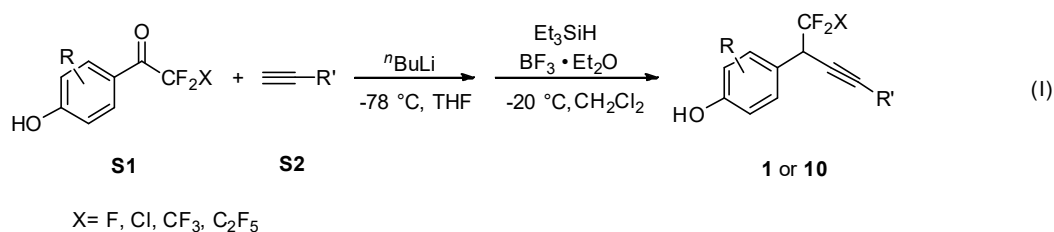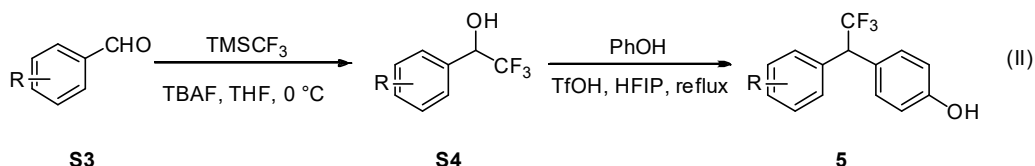

### Procedure I for preparation of substrate 1 or 10<sup>[1-2]</sup>

To a solution of terminal alkyne **S2** (6.3 mmol, 2.1 equiv) in anhydrous THF at -78 °C under N<sub>2</sub> was added <sup>n</sup>BuLi (6 mmol, 2.4 mL, 2.5 M in hexane, 2.0 equiv) dropwise. The reaction was stirred at the same temperature for 1 h. Then a solution of the corresponding ketone **S1** (3 mmol, 1.0 equiv) in anhydrous THF (5 mL) was added to the mixture dropwise. The reaction was stirred at -78 °C for 15 min and then it was warmed up to room temperature slowly and stirred overnight. Upon completion, the mixture was quenched dropwise by a saturated aqueous NH<sub>4</sub>Cl solution (5 mL). The organic layer was extracted with ethyl acetate (3×15 mL) and the combined organic layers were washed with saturated aqueous NaCl solution, dried over anhydrous MgSO<sub>4</sub>, filtered and removed under vacuum. Then the residue was dissolved in anhydrous CH<sub>2</sub>Cl<sub>2</sub> (15 mL) at -20 °C and Et<sub>3</sub>SiH (12 mmol, 4.0 equiv) and BF<sub>3</sub>·Et<sub>2</sub>O (7.5 mmol, 2.5 equiv) were added to the solution. The reaction was stirred at the same temperature and monitored by TLC until the complete conversion. Then the reaction was quenched by saturated aqueous NaHCO<sub>3</sub> solution (10 mL). The organic layer was extracted with CH<sub>2</sub>Cl<sub>2</sub> (3×15 mL) and the combined organic layers were washed with saturated aqueous NaCl solution, dried over anhydrous MgSO<sub>4</sub>, filtered and removed under vacuum. The residue was purified by a column chromatography on silica gel using ethyl acetate/petroleum ether as eluent to give the desired product **1** or **10**.

### Procedure II for preparation of substrate 5<sup>[3-4]</sup>

To a solution of aromatic aldehyde **S3** (2.0 mmol, 1.0 equiv) in anhydrous THF at 0 °C under N<sub>2</sub> was added TMSCF<sub>3</sub> (2.4 mmol, 1.2 equiv) and TBAF (2.4 mmol, 2.4 mL, 1.0 mol/L in THF, 1.2 equiv) dropwise. Then the reaction was warmed to room temperature and monitored by TLC until the complete conversion. Then the mixture was quenched dropwise by a saturated aqueous NH<sub>4</sub>Cl solution (5 mL). The organic layer was extracted with ethyl acetate (3×15 mL) and the combined organic layers were washed with saturated aqueous NaCl solution, dried over anhydrous MgSO<sub>4</sub>, filtered and removed under vacuum. The residue was purified by a column chromatography on silica gel using ethyl acetate/petroleum ether as eluent to give the desired product **S4**. Then the product **S4** was dissolved in HFIP (5 mL) and TfOH (0.05 equiv) and PhOH (3.0 equiv) were added to the solution. The mixture was heated to reflux and monitored by TLC until the complete conversion. Then the reaction was quenched by saturated aqueous NaHCO<sub>3</sub> solution (10 mL). The organic layer was extracted with CH<sub>2</sub>Cl<sub>2</sub> (3×15 mL) and the combined organic layers were washed with saturated aqueous NaCl solution, dried over anhydrous MgSO<sub>4</sub>, filtered and removed under vacuum. The residue was purified by a column chromatography on silica gel using ethyl acetate/petroleum ether as eluent to give the desired product **5**.

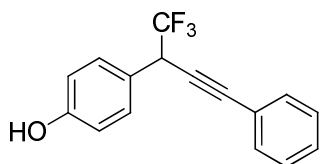

**4-(1,1,1-Trifluoro-4-phenylbut-3-yn-2-yl)phenol (1a)**

<sup>1</sup>H NMR (500 MHz, CDCl<sub>3</sub>) δ 7.52 (d, *J* = 7.4 Hz, 2H), 7.44 (d, *J* = 8.3 Hz, 2H), 7.39 – 7.32 (m, 3H), 6.88 (d, *J* = 8.4 Hz, 2H), 5.41 (brs, 1H), 4.52 (q, *J* = 8.0 Hz, 1H); <sup>13</sup>C NMR (126 MHz, CDCl<sub>3</sub>) δ 156.2, 132.1, 131.0, 129.0, 128.6, 124.6 (q, *J* = 280.4 Hz), 124.4, 122.4, 115.8, 85.8, 82.1 (q, *J* = 3.2 Hz), 43.5 (q, *J* = 31.6 Hz); <sup>19</sup>F NMR (471 MHz, CDCl<sub>3</sub>) δ -70.8; HRMS (ESI) *m/z* calculated for C<sub>16</sub>H<sub>10</sub>F<sub>3</sub>O [M - H]<sup>-</sup> 275.0689, found 275.0679.

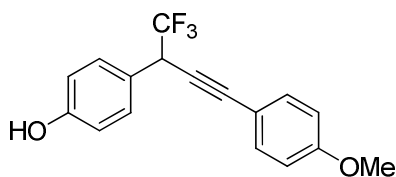

**4-(1,1,1-Trifluoro-4-(4-methoxyphenyl)but-3-yn-2-yl)phenol (1b)**

$^1\text{H}$  NMR (500 MHz,  $\text{CDCl}_3$ )  $\delta$  7.46 – 7.38 (m, 4H), 6.88 – 6.82 (m, 4H), 4.48 (q,  $J$  = 8.0 Hz, 1H), 3.82 (s, 3H);  $^{13}\text{C}$  NMR (126 MHz,  $\text{CDCl}_3$ )  $\delta$  160.1, 156.2, 133.6, 131.0, 124.6 (q,  $J$  = 280.4 Hz), 124.6, 115.7, 114.5, 114.2, 85.6, 80.6 (q,  $J$  = 3.3 Hz), 55.5, 43.5 (q,  $J$  = 31.5 Hz);  $^{19}\text{F}$  NMR (471 MHz,  $\text{CDCl}_3$ )  $\delta$  -70.9; HRMS (ESI)  $m/z$  calculated for  $\text{C}_{17}\text{H}_{12}\text{F}_3\text{O}_2$   $[\text{M} - \text{H}]^-$  305.0795, found 305.0803.

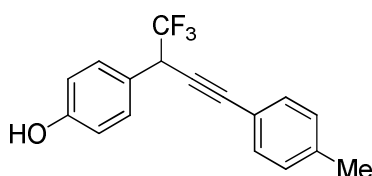

#### 4-(1,1,1-Trifluoro-4-(p-tolyl)but-3-yn-2-yl)phenol (1c)

$^1\text{H}$  NMR (500 MHz,  $\text{CDCl}_3$ )  $\delta$  7.46 – 7.36 (m, 4H), 7.15 (d,  $J$  = 7.9 Hz, 2H), 6.87 (d,  $J$  = 8.5 Hz, 2H), 5.11 (brs, 1H), 4.50 (q,  $J$  = 8.0 Hz, 1H), 2.37 (s, 3H);  $^{13}\text{C}$  NMR (126 MHz,  $\text{CDCl}_3$ )  $\delta$  156.2, 139.2, 132.0, 131.0, 129.3, 124.6 (q,  $J$  = 280.4 Hz), 124.5, 119.3, 115.8, 85.9, 81.3 (q,  $J$  = 3.3 Hz), 43.5 (q,  $J$  = 31.5 Hz), 21.7;  $^{19}\text{F}$  NMR (471 MHz,  $\text{CDCl}_3$ )  $\delta$  -70.8; HRMS (ESI)  $m/z$  calculated for  $\text{C}_{17}\text{H}_{12}\text{F}_3\text{O}$   $[\text{M} - \text{H}]^-$  289.0846, found 289.0843.

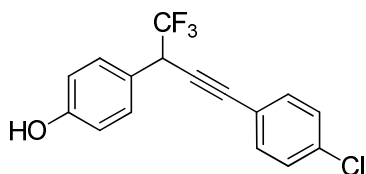

#### 4-(4-(4-Chlorophenyl)-1,1,1-trifluorobut-3-yn-2-yl)phenol (1d)

$^1\text{H}$  NMR (500 MHz,  $\text{CDCl}_3$ )  $\delta$  7.44 – 7.38 (m, 4H), 7.31 (d,  $J$  = 8.6 Hz, 2H), 6.88 (d,  $J$  = 8.6 Hz, 2H), 5.33 (brs, 1H), 4.49 (q,  $J$  = 8.0 Hz, 1H);  $^{13}\text{C}$  NMR (126 MHz,  $\text{CDCl}_3$ )  $\delta$  156.3, 135.1, 133.3, 130.9, 128.9, 124.5 (q,  $J$  = 280.4 Hz), 124.1, 120.8, 115.9, 84.6, 83.1 (q,  $J$  = 3.3 Hz), 43.5 (q,  $J$  = 31.6 Hz);  $^{19}\text{F}$  NMR (471 MHz,  $\text{CDCl}_3$ )  $\delta$  -70.8; HRMS (ESI)  $m/z$  calculated for  $\text{C}_{16}\text{H}_9\text{ClF}_3\text{O}$   $[\text{M} - \text{H}]^-$  309.0300, found 309.0291.

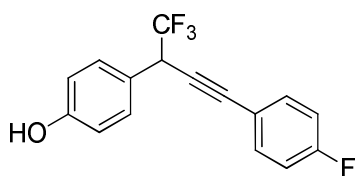

#### 4-(1,1,1-Trifluoro-4-(4-fluorophenyl)but-3-yn-2-yl)phenol (1e)

$^1\text{H}$  NMR (500 MHz,  $\text{CDCl}_3$ )  $\delta$  7.53 – 7.44 (m, 2H), 7.40 (d,  $J = 8.4$  Hz, 2H), 7.09 – 6.98 (m, 2H), 6.87 (d,  $J = 8.4$  Hz, 2H), 5.05 (brs, 1H), 4.48 (q,  $J = 8.0$  Hz, 1H);  $^{13}\text{C}$  NMR (126 MHz,  $\text{CDCl}_3$ )  $\delta$  163.0 (d,  $J = 250.1$  Hz), 156.3, 134.1 (d,  $J = 8.5$  Hz), 130.9, 124.5 (q,  $J = 280.4$  Hz), 124.2, 118.4 (d,  $J = 3.5$  Hz), 115.9 (d,  $J = 22.1$  Hz), 115.8, 84.7, 81.8 (q,  $J = 1.7$  Hz), 43.5 (q,  $J = 31.6$  Hz);  $^{19}\text{F}$  NMR (471 MHz,  $\text{CDCl}_3$ )  $\delta$  -70.8, -110.1; HRMS (ESI)  $m/z$  calculated for  $\text{C}_{16}\text{H}_9\text{F}_4\text{O}$   $[\text{M} - \text{H}]^-$  293.0595, found 293.0587.

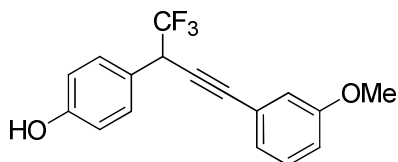

**4-(1,1,1-Trifluoro-4-(3-methoxyphenyl)but-3-yn-2-yl)phenol (1f)**

$^1\text{H}$  NMR (500 MHz,  $\text{CDCl}_3$ )  $\delta$  7.38 (d,  $J = 8.3$  Hz, 2H), 7.24 – 7.18 (m, 1H), 7.09 – 7.04 (m, 1H), 7.01 – 6.98 (m, 1H), 6.91 – 6.87 (m, 1H), 6.83 (d,  $J = 8.6$  Hz, 2H), 5.26 (brs, 1H), 4.46 (q,  $J = 8.0$  Hz, 1H), 3.78 (s, 3H);  $^{13}\text{C}$  NMR (126 MHz,  $\text{CDCl}_3$ )  $\delta$  159.4, 156.2, 131.0, 129.7, 124.7, 124.6 (q,  $J = 280.4$  Hz), 124.3, 123.4, 116.9, 115.8, 115.6, 85.6, 81.9 (q,  $J = 3.3$  Hz), 55.6, 43.5 (q,  $J = 31.6$  Hz);  $^{19}\text{F}$  NMR (471 MHz,  $\text{CDCl}_3$ )  $\delta$  -70.7; HRMS (ESI)  $m/z$  calculated for  $\text{C}_{17}\text{H}_{12}\text{F}_3\text{O}_2$   $[\text{M} - \text{H}]^-$  305.0795, found 305.0788.

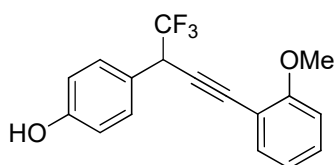

**4-(1,1,1-Trifluoro-4-(2-methoxyphenyl)but-3-yn-2-yl)phenol (1g)**

$^1\text{H}$  NMR (500 MHz,  $\text{CDCl}_3$ )  $\delta$  7.49 – 7.42 (m, 3H), 7.35 – 7.30 (m, 1H), 6.96 – 6.90 (m, 1H), 6.89 (d,  $J = 8.4$  Hz, 1H), 6.84 (d,  $J = 8.7$  Hz, 2H), 5.08 (brs, 1H), 4.54 (q,  $J = 8.0$  Hz, 1H), 3.88 (s, 3H);  $^{13}\text{C}$  NMR (126 MHz,  $\text{CDCl}_3$ )  $\delta$  160.7, 156.2, 134.0, 131.1, 130.4, 124.6 (q,  $J = 280.5$  Hz), 124.5, 120.7, 115.7, 111.7, 111.1, 86.1 (q,  $J = 3.4$  Hz), 82.2, 56.1, 43.7 (q,  $J = 31.4$  Hz);  $^{19}\text{F}$  NMR (471 MHz,  $\text{CDCl}_3$ )  $\delta$  -70.8; HRMS (ESI)  $m/z$  calculated for  $\text{C}_{17}\text{H}_{12}\text{F}_3\text{O}_2$   $[\text{M} - \text{H}]^-$  305.0795, found 305.0797.

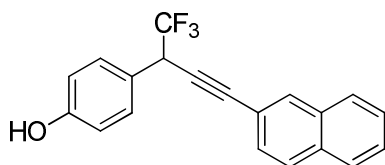

**4-(1,1,1-Trifluoro-4-(naphthalen-2-yl)but-3-yn-2-yl)phenol (1h)**

$^1\text{H}$  NMR (500 MHz,  $\text{CDCl}_3$ )  $\delta$  8.04 (s, 1H), 7.85 – 7.78 (m, 3H), 7.56 – 7.49 (m, 3H), 7.47 (d,  $J$  = 8.5 Hz, 2H), 6.89 (d,  $J$  = 8.7 Hz, 2H), 5.21 (brs, 1H), 4.56 (q,  $J$  = 8.0 Hz, 1H);  $^{13}\text{C}$  NMR (126 MHz,  $\text{CDCl}_3$ )  $\delta$  156.3, 133.2, 133.1, 132.2, 131.0, 128.6, 128.3, 128.0, 128.0, 127.1, 126.9, 124.6 (q,  $J$  = 280.5 Hz), 124.3, 119.6, 115.8, 86.1, 82.3 (q,  $J$  = 3.3 Hz), 43.6 (q,  $J$  = 31.5 Hz);  $^{19}\text{F}$  NMR (471 MHz,  $\text{CDCl}_3$ )  $\delta$  -70.7; HRMS (ESI)  $m/z$  calculated for  $\text{C}_{20}\text{H}_{12}\text{F}_3\text{O}$  [ $\text{M} - \text{H}$ ] $^-$  325.0846, found 325.0843.

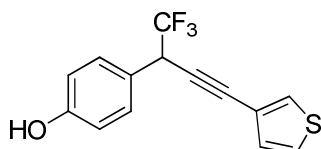

#### 4-(1,1,1-Trifluoro-4-(thiophen-3-yl)but-3-yn-2-yl)phenol (1i)

$^1\text{H}$  NMR (500 MHz,  $\text{DMSO}-d_6$ )  $\delta$  9.66 (brs, 1H), 7.93 – 7.85 (m, 1H), 7.65 – 7.59 (m, 1H), 7.35 (d,  $J$  = 8.5 Hz, 2H), 7.24 – 7.19 (m, 1H), 6.82 (d,  $J$  = 8.6 Hz, 2H), 5.21 (q,  $J$  = 8.7 Hz, 1H);  $^{13}\text{C}$  NMR (126 MHz,  $\text{DMSO}-d_6$ )  $\delta$  157.9, 130.7, 130.4, 129.6, 127.0, 124.8 (q,  $J$  = 280.0 Hz), 121.7, 120.2, 115.5, 82.2 (q,  $J$  = 3.1 Hz), 80.0, 41.3 (q,  $J$  = 30.5 Hz);  $^{19}\text{F}$  NMR (471 MHz,  $\text{Acetone}-d_6$ )  $\delta$  -71.4; HRMS (ESI)  $m/z$  calculated for  $\text{C}_{14}\text{H}_8\text{F}_3\text{OS}$  [ $\text{M} - \text{H}$ ] $^-$  281.0253, found 281.0248.

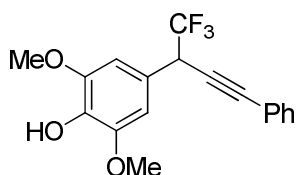

#### 2,6-Dimethoxy-4-(1,1,1-trifluoro-4-phenylbut-3-yn-2-yl)phenol (1j)

$^1\text{H}$  NMR (500 MHz,  $\text{CD}_3\text{OD}$ )  $\delta$  7.49 – 7.44 (m, 2H), 7.39 – 7.32 (m, 3H), 6.84 (s, 2H), 4.85 (brs, 1H), 4.79 (q,  $J$  = 8.2 Hz, 1H), 3.86 (s, 6H);  $^{13}\text{C}$  NMR (126 MHz,  $\text{CD}_3\text{OD}$ )  $\delta$  149.2, 137.4, 132.7, 129.9, 129.6, 126.1 (q,  $J$  = 279.5 Hz), 123.8, 123.5, 107.9, 86.3, 83.3 (q,  $J$  = 3.4 Hz), 56.9, 44.3 (q,  $J$  = 31.3 Hz);  $^{19}\text{F}$  NMR (471 MHz,  $\text{CD}_3\text{OD}$ )  $\delta$  -72.1; HRMS (ESI)  $m/z$  calculated for  $\text{C}_{18}\text{H}_{14}\text{F}_3\text{O}_3$  [ $\text{M} - \text{H}$ ] $^-$  335.0901, found 335.0908.

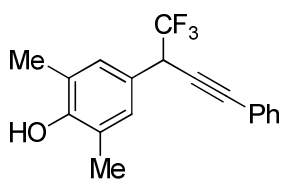

#### 2,6-Dimethyl-4-(1,1,1-trifluoro-4-phenylbut-3-yn-2-yl)phenol (1k)



$^1\text{H}$  NMR (500 MHz,  $\text{CDCl}_3$ )  $\delta$  7.54 – 7.47 (m, 2H), 7.38 – 7.31 (m, 3H), 7.15 (s, 2H), 4.70 (brs, 1H), 4.43 (q,  $J = 8.1$  Hz, 1H), 2.28 (s, 6H);  $^{13}\text{C}$  NMR (126 MHz,  $\text{CDCl}_3$ )  $\delta$  152.9, 132.1, 129.7, 128.9, 128.5, 126.9 (q,  $J = 280.7$  Hz), 123.5, 122.6, 85.5, 82.4 (q,  $J = 3.1$  Hz), 43.6 (q,  $J = 31.4$  Hz), 16.1;  $^{19}\text{F}$  NMR (471 MHz,  $\text{CDCl}_3$ )  $\delta$  -70.7; HRMS (ESI)  $m/z$  calculated for  $\text{C}_{18}\text{H}_{14}\text{F}_3\text{O}$  [ $\text{M} - \text{H}$ ] $^-$  303.1002, found 303.0998.

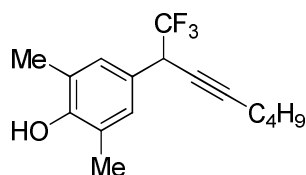

### 2,6-Dimethyl-4-(1,1,1-trifluorooct-3-yn-2-yl)phenol (1l)

$^1\text{H}$  NMR (500 MHz,  $\text{CDCl}_3$ )  $\delta$  7.08 (s, 2H), 4.69 (brs, 1H), 4.18 (qt,  $J = 8.2, 2.2$  Hz, 1H), 2.30 – 2.24 (m, 8H), 1.59 – 1.52 (m, 2H), 1.50 – 1.42 (m, 2H), 0.94 (t,  $J = 7.3$  Hz, 3H);  $^{13}\text{C}$  NMR (126 MHz,  $\text{CDCl}_3$ )  $\delta$  152.7, 129.6, 124.9 (q,  $J = 280.1$  Hz), 124.2, 123.3, 86.2, 73.2 (q,  $J = 3.2$  Hz), 43.0 (q,  $J = 31.1$  Hz), 30.8, 22.1, 18.6, 16.1, 13.8;  $^{19}\text{F}$  NMR (471 MHz,  $\text{CDCl}_3$ )  $\delta$  -71.1; HRMS (ESI)  $m/z$  calculated for  $\text{C}_{16}\text{H}_{18}\text{F}_3\text{O}$  [ $\text{M} - \text{H}$ ] $^-$  283.1315, found 283.1321.

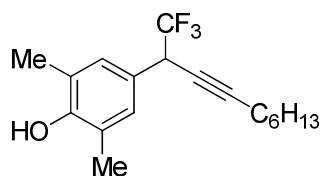

### 2,6-Dimethyl-4-(1,1,1-trifluorodec-3-yn-2-yl)phenol (1m)

$^1\text{H}$  NMR (500 MHz,  $\text{CDCl}_3$ )  $\delta$  7.07 (s, 2H), 4.68 (brs, 1H), 4.17 (qt,  $J = 8.2, 2.2$  Hz, 1H), 2.27 – 2.24 (m, 8H), 1.58 – 1.51 (m, 2H), 1.45 – 1.38 (m, 2H), 1.33 – 1.26 (m, 4H), 0.89 (t,  $J = 7.0$  Hz, 3H);  $^{13}\text{C}$  NMR (126 MHz,  $\text{CDCl}_3$ )  $\delta$  152.7, 129.6, 124.9 (q,  $J = 280.1$  Hz), 124.2, 123.3, 86.3, 73.2 (q,  $J = 3.5$  Hz), 43.0 (q,  $J = 30.9$  Hz), 31.5, 28.7, 28.7, 22.8, 18.9, 16.1, 14.2;  $^{19}\text{F}$  NMR (471 MHz,  $\text{CDCl}_3$ )  $\delta$  -71.2; HRMS (ESI)  $m/z$  calculated for  $\text{C}_{18}\text{H}_{22}\text{F}_3\text{O}$  [ $\text{M} - \text{H}$ ] $^-$  311.1628, found 311.1620.

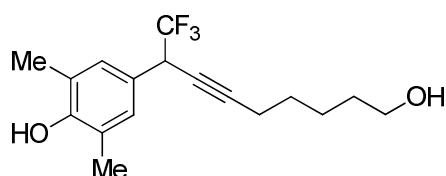

### 2,6-Dimethyl-4-(1,1,1-trifluoro-9-hydroxynon-3-yn-2-yl)phenol (1n)

$^1\text{H}$  NMR (500 MHz,  $\text{CDCl}_3$ )  $\delta$  7.06 (s, 2H), 4.20 – 4.12 (m, 1H), 3.66 (t,  $J = 6.5$  Hz, 2H), 2.30 – 2.23 (m, 8H), 1.63 – 1.55 (m, 4H), 1.52 – 1.47 (m, 2H);  $^{13}\text{C}$  NMR (126 MHz,  $\text{CDCl}_3$ )  $\delta$  152.6, 129.4, 124.7 (q,  $J = 280.2$  Hz), 123.8, 123.3, 85.7, 73.3 (q,  $J = 3.8$  Hz), 62.9, 42.7 (q,  $J = 31.2$  Hz), 32.2, 28.2, 24.9, 18.7, 16.0;  $^{19}\text{F}$  NMR (471 MHz,  $\text{CDCl}_3$ )  $\delta$  -71.1; HRMS (ESI)  $m/z$  calculated for  $\text{C}_{17}\text{H}_{20}\text{F}_3\text{O}_2$  [ $\text{M} - \text{H}$ ] $^-$  313.1421, found 313.1423.

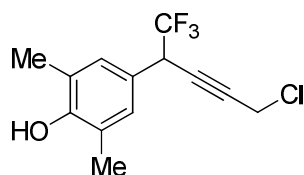

### 4-(5-Chloro-1,1,1-trifluoropent-3-yn-2-yl)-2,6-dimethylphenol (1o)

$^1\text{H}$  NMR (500 MHz,  $\text{CDCl}_3$ )  $\delta$  7.04 (s, 2H), 4.28 – 4.23 (m, 1H), 4.21 (d,  $J = 2.1$  Hz, 2H), 2.26 (s, 6H);  $^{13}\text{C}$  NMR (126 MHz,  $\text{CDCl}_3$ )  $\delta$  153.0, 129.6, 124.4 (q,  $J = 280.4$  Hz), 123.6, 122.7, 80.3, 79.8 (q,  $J = 3.0$  Hz), 43.0 (q,  $J = 31.6$  Hz), 30.4, 16.1;  $^{19}\text{F}$  NMR (471 MHz,  $\text{CDCl}_3$ )  $\delta$  -70.4; HRMS (ESI)  $m/z$  calculated for  $\text{C}_{13}\text{H}_{11}\text{ClF}_3\text{O}$  [ $\text{M} - \text{H}$ ] $^-$  275.0456, found 275.0449.

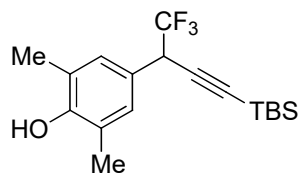

### 4-(4-(Tert-butyl)dimethylsilyl)-1,1,1-trifluorobut-3-yn-2-yl)-2,6-dimethylphenol (1p)

$^1\text{H}$  NMR (500 MHz,  $\text{CDCl}_3$ )  $\delta$  7.09 (s, 2H), 4.70 (brs, 1H), 4.23 (q,  $J = 8.1$  Hz, 1H), 2.26 (s, 6H), 0.98 (s, 9H), 0.15 (s, 3H), 0.15 (s, 3H);  $^{13}\text{C}$  NMR (126 MHz,  $\text{CDCl}_3$ )  $\delta$  152.8, 129.8, 124.5 (q,  $J = 280.4$  Hz), 123.4, 123.3, 99.0 (q,  $J = 3.1$  Hz), 89.5, 43.8 (q,  $J = 31.2$  Hz), 26.2, 16.9, 16.1, -4.6;  $^{19}\text{F}$  NMR (471 MHz,  $\text{CDCl}_3$ )  $\delta$  -70.9; HRMS (ESI)  $m/z$  calculated for  $\text{C}_{18}\text{H}_{24}\text{F}_3\text{OSi}$  [ $\text{M} - \text{H}$ ] $^-$  341.1554, found 341.1568.

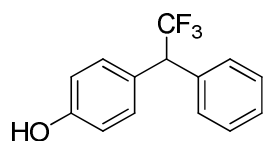

### 4-(2,2,2-Trifluoro-1-phenylethyl)phenol (5a)

$^1\text{H}$  NMR (600 MHz,  $\text{CDCl}_3$ )  $\delta$  7.41 – 7.28 (m, 5H), 7.24 (d,  $J$  = 8.3 Hz, 2H), 6.81 (d,  $J$  = 8.6 Hz, 2H), 4.63 (q,  $J$  = 10.0 Hz, 1H);  $^{13}\text{C}$  NMR (151 MHz,  $\text{CDCl}_3$ )  $\delta$  155.3, 135.8 (q,  $J$  = 1.0 Hz), 130.7, 129.2, 128.9, 128.0, 128.0 (q,  $J$  = 1.4 Hz), 126.4 (q,  $J$  = 280.4 Hz, 2H), 115.8, 54.9 (q,  $J$  = 27.5 Hz);  $^{19}\text{F}$  NMR (471 MHz,  $\text{CDCl}_3$ )  $\delta$  -66.1; HRMS (ESI)  $m/z$  calculated for  $\text{C}_{14}\text{H}_{10}\text{F}_3\text{O}$   $[\text{M} - \text{H}]^-$  251.0689, found 251.0694.

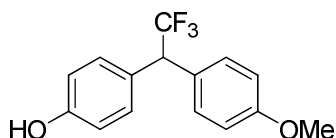

#### 4-(2,2,2-Trifluoro-1-(4-methoxyphenyl)ethyl)phenol (5b)

$^1\text{H}$  NMR (500 MHz,  $\text{CD}_3\text{OD}$ )  $\delta$  7.27 (d,  $J$  = 8.7 Hz, 2H), 7.19 (d,  $J$  = 8.5 Hz, 2H), 6.85 (d,  $J$  = 8.8 Hz, 2H), 6.76 (d,  $J$  = 8.7 Hz, 2H), 4.67 (q,  $J$  = 10.4 Hz, 1H), 3.72 (s, 3H);  $^{13}\text{C}$  NMR (126 MHz,  $\text{CD}_3\text{OD}$ )  $\delta$  160.6, 158.1, 131.2, 131.2, 129.5, 128.1, 128.1 (q,  $J$  = 279.5 Hz), 116.3, 114.9, 55.6, 54.8 (q,  $J$  = 27.4 Hz);  $^{19}\text{F}$  NMR (471 MHz,  $\text{CD}_3\text{OD}$ )  $\delta$  -67.8; HRMS (ESI)  $m/z$  calculated for  $\text{C}_{15}\text{H}_{12}\text{F}_3\text{O}_2$   $[\text{M} - \text{H}]^-$  281.0795, found 281.0803.

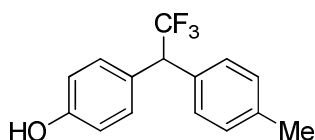

#### 4-(2,2,2-Trifluoro-1-(p-tolyl)ethyl)phenol (5c)

$^1\text{H}$  NMR (500 MHz,  $\text{CDCl}_3$ )  $\delta$  7.30 – 7.24 (m, 4H), 7.19 (d,  $J$  = 7.9 Hz, 2H), 6.82 (d,  $J$  = 8.6 Hz, 2H), 5.19 (brs, 1H), 4.61 (q,  $J$  = 10.0 Hz, 1H), 2.36 (s, 3H);  $^{13}\text{C}$  NMR (126 MHz,  $\text{CDCl}_3$ )  $\delta$  155.2, 137.8, 132.9, 130.6, 129.6, 129.0, 128.2 (q,  $J$  = 1.5 Hz), 126.5 (q,  $J$  = 280.4 Hz), 115.7, 54.6 (q,  $J$  = 27.5 Hz), 21.2;  $^{19}\text{F}$  NMR (471 MHz,  $\text{CDCl}_3$ )  $\delta$  -66.2; HRMS (ESI)  $m/z$  calculated for  $\text{C}_{15}\text{H}_{12}\text{F}_3\text{O}$   $[\text{M} - \text{H}]^-$  265.0846, found 265.0839.

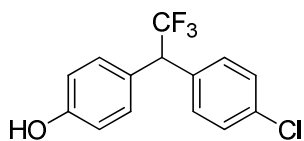

#### 4-(1-(4-Chlorophenyl)-2,2,2-trifluoroethyl)phenol (5d)

$^1\text{H}$  NMR (500 MHz,  $\text{CDCl}_3$ )  $\delta$  7.34 – 7.27 (m, 4H), 7.20 (d,  $J$  = 8.6 Hz, 2H), 6.82 (d,  $J$  = 8.7 Hz, 2H), 5.08 (brs, 1H), 4.60 (q,  $J$  = 9.8 Hz, 1H);  $^{13}\text{C}$  NMR (126 MHz,  $\text{CDCl}_3$ )  $\delta$  155.6, 134.4, 134.1, 130.6, 130.6, 129.1, 127.4, 126.2 (q,  $J$  = 280.4 Hz), 115.9, 54.3 (q,  $J$  = 27.8 Hz);  $^{19}\text{F}$  NMR (471 MHz,  $\text{CDCl}_3$ )  $\delta$  -66.3; HRMS (ESI)  $m/z$  calculated for  $\text{C}_{14}\text{H}_9\text{ClF}_3\text{O}$  [ $\text{M} - \text{H}$ ] $^-$  285.0300, found 285.0306.

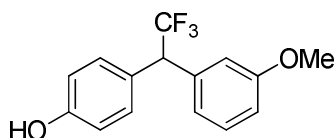

#### 4-(2,2,2-Trifluoro-1-(3-methoxyphenyl)ethyl)phenol (5e)

$^1\text{H}$  NMR (500 MHz,  $\text{CDCl}_3$ )  $\delta$  7.28 – 7.23 (m, 1H), 7.21 (d,  $J$  = 8.6 Hz, 2H), 6.96 (d,  $J$  = 7.7 Hz, 1H), 6.91 (s, 1H), 6.86 – 6.82 (m, 1H), 6.76 (d,  $J$  = 8.7 Hz, 2H), 5.53 (brs, 1H), 4.57 (q,  $J$  = 9.9 Hz, 1H), 3.77 (s, 3H);  $^{13}\text{C}$  NMR (126 MHz,  $\text{CDCl}_3$ )  $\delta$  159.8, 155.4, 137.3, 130.6, 129.9, 127.8, 126.4 (q,  $J$  = 280.5 Hz), 121.7, 115.8, 115.5, 113.1, 55.5, 54.9 (q,  $J$  = 27.6 Hz);  $^{19}\text{F}$  NMR (471 MHz,  $\text{CDCl}_3$ )  $\delta$  -66.0; HRMS (ESI)  $m/z$  calculated for  $\text{C}_{15}\text{H}_{12}\text{F}_3\text{O}_2$  [ $\text{M} - \text{H}$ ] $^-$  281.0795, found 281.0799.

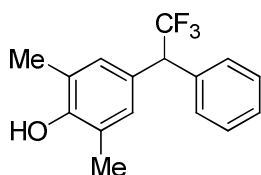

#### 2,6-Dimethyl-4-(2,2,2-trifluoro-1-phenylethyl)phenol (5f)

$^1\text{H}$  NMR (600 MHz,  $\text{CDCl}_3$ )  $\delta$  7.42 – 7.34 (m, 4H), 7.34 – 7.30 (m, 1H), 7.00 (s, 2H), 4.65 (brs, 1H), 4.57 (q,  $J$  = 10.1 Hz, 1H), 2.24 (s, 6H);  $^{13}\text{C}$  NMR (126 MHz,  $\text{CDCl}_3$ )  $\delta$  152.1, 136.1 (q,  $J$  = 1.2 Hz), 129.5, 129.2, 128.9, 127.9, 127.2 (q,  $J$  = 1.3 Hz), 126.6 (q,  $J$  = 280.5 Hz), 123.5, 55.1 (q,  $J$  = 27.4 Hz), 16.2;  $^{19}\text{F}$  NMR (471 MHz,  $\text{CDCl}_3$ )  $\delta$  -66.0; HRMS (ESI)  $m/z$  calculated for  $\text{C}_{16}\text{H}_{14}\text{F}_3\text{O}$  [ $\text{M} - \text{H}$ ] $^-$  279.1002, found 279.0993.

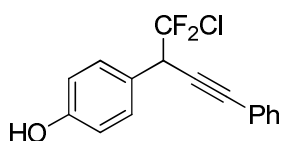

#### 4-(1-Chloro-1,1-difluoro-4-phenylbut-3-yn-2-yl)phenol (10a)

$^1\text{H}$  NMR (500 MHz,  $\text{CD}_3\text{OD}$ )  $\delta$  7.51 – 7.42 (m, 2H), 7.38 (d, 2H), 7.35 – 7.26 (m, 3H), 6.85 – 6.81 (m, 2H), 4.84 – 4.73 (m, 1H);  $^{13}\text{C}$  NMR (126 MHz,  $\text{CD}_3\text{OD}$ )  $\delta$  159.1, 132.6, 132.1, 130.2 (t,  $J = 295.0$  Hz), 129.8, 129.5, 124.8, 123.6, 116.2, 86.7, 84.4 (t,  $J = 4.5$  Hz), 50.4 (t,  $J = 27.2$  Hz);  $^{19}\text{F}$  NMR (471 MHz,  $\text{CD}_3\text{OD}$ )  $\delta$  -51.64 – -54.25 (m, 2F); HRMS (ESI)  $m/z$  calculated for  $\text{C}_{16}\text{H}_{10}\text{ClF}_2\text{O}$   $[\text{M} - \text{H}]^-$  291.0394, found 291.0399.

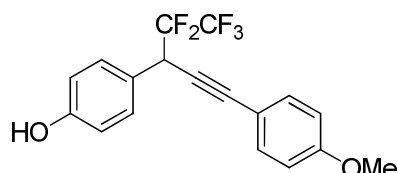

**4-(4,4,5,5,5-Pentafluoro-1-(4-methoxyphenyl)pent-1-yn-3-yl)phenol (10b)**

$^1\text{H}$  NMR (500 MHz,  $\text{CD}_3\text{OD}$ )  $\delta$  7.38 – 7.31 (m, 4H), 6.89 – 6.86 (m, 2H), 6.82 (d,  $J = 8.6$  Hz, 2H), 4.75 – 4.65 (m, 1H), 3.77 (s, 3H);  $^{13}\text{C}$  NMR (126 MHz,  $\text{CD}_3\text{OD}$ )  $\delta$  161.5, 159.2, 134.1, 132.0, 123.5, 125.4 – 116.1 (m), 116.4, 115.5, 115.1, 86.8, 81.3 (dd,  $J = 9.3, 2.5$  Hz), 55.8, 41.6 (dd,  $J = 26.6, 22.4$  Hz);  $^{19}\text{F}$  NMR (471 MHz,  $\text{CD}_3\text{OD}$ )  $\delta$  -82.3 – -82.5 (m, 3F), -115.7 – -122.6 (m, 2F); HRMS (ESI)  $m/z$  calculated for  $\text{C}_{18}\text{H}_{12}\text{F}_5\text{O}_2$   $[\text{M} - \text{H}]^-$  355.0763, found 355.0755.

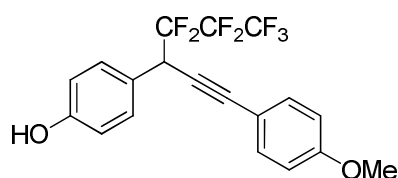

**4-(4,4,5,5,6,6,6-Heptafluoro-1-(4-methoxyphenyl)hex-1-yn-3-yl)phenol (10c)**

$^1\text{H}$  NMR (500 MHz,  $\text{CDCl}_3$ )  $\delta$  7.44 – 7.39 (m, 4H), 6.89 – 6.85 (m, 4H), 5.48 (brs, 1H), 4.61 – 4.52 (m, 1H), 3.82 (s, 3H);  $^{13}\text{C}$  NMR (126 MHz,  $\text{CDCl}_3$ )  $\delta$  160.1, 156.3, 133.5, 131.6, 123.8, 115.7, 114.6, 121.99 – 106.96 (m), 114.2, 86.3, 80.3 (d,  $J = 9.8$  Hz), 55.5, 41.1 (dd,  $J = 27.7, 22.6$  Hz);  $^{19}\text{F}$  NMR (471 MHz,  $\text{CDCl}_3$ )  $\delta$  -80.6 – -80.7 (m, 3F), -111.5 – -112.3 (m, 1F), -116.5 – -117.3 (m, 1F), -122.6 – -125.3 (m, 2F); HRMS (ESI)  $m/z$  calculated for  $\text{C}_{19}\text{H}_{12}\text{F}_7\text{O}_2$   $[\text{M} - \text{H}]^-$  405.0731, found 405.0744.

## General procedure

### General procedure for asymmetric CDC of racemic *p*-hydroxybenzyl CF<sub>3</sub> moieties with heteroarenes

A mixture of **1** or **5** (0.1 mmol, 1.0 equiv), activated MnO<sub>2</sub> (0.3 mmol, 3.0 equiv), and DDQ (0.025 mmol, 0.25 equiv) in anhydrous CH<sub>2</sub>Cl<sub>2</sub> (1.0 mL) was stirred at 60 °C in a sealed tube and monitored by TLC. Upon starting material consumption, the mixture was cooled to -78 °C directly and stirred at the same temperature for 15 min. (Note: the paraquinomethide could be stable in this system.) Then 3 Å molecular sieves (20 mg), K<sub>2</sub>CO<sub>3</sub> (0.2 mmol, 2.0 equiv), **2a** (0.3 mmol, 3.0 equiv) and catalyst **3c** (0.005 mmol, 0.05 equiv) were added in sequence quickly. (Attention: the order of addition is important.) Then the mixture was stirred at the same temperature and monitored by TLC. Upon completion, the reaction was warm to room temperature and a solution of saturated aqueous NaCl solution (1 ml) was added to the mixture. Then the mixture was extracted with EtOAc, and the combined organic layer was dried over MgSO<sub>4</sub>, filtered and evaporated under vacuum. The residue was purified by a flash column chromatography to give the desired product.

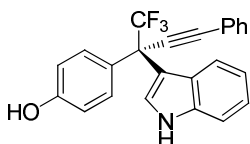

#### (*S*)-4-(1,1,1-Trifluoro-2-(1*H*-indol-3-yl)-4-phenylbut-3-yn-2-yl)phenol (**4a**)

It was purified by silica gel chromatography using EtOAc/petroleum ether (1:4). Yield: 86% (33.7 mg). <sup>1</sup>H NMR (600 MHz, CDCl<sub>3</sub>) δ 8.17 (brs, 1H), 7.53 (d, *J* = 8.6 Hz, 2H), 7.50 – 7.45 (m, 2H), 7.42 – 7.27 (m, 6H), 7.20 – 7.15 (m, 1H), 7.01 – 6.96 (m, 1H), 6.77 (d, *J* = 8.8 Hz, 2H); <sup>13</sup>C NMR (151 MHz, CDCl<sub>3</sub>) δ 155.7, 136.6, 132.1, 130.7, 129.1, 128.8, 128.5, 125.8 (q, *J* = 284.2 Hz), 125.7, 123.0 (q, *J* = 2.6 Hz), 122.6, 122.6, 121.3, 120.1, 115.2, 112.6, 111.4, 86.5, 86.2 (q, *J* = 1.5 Hz), 51.2 (q, *J* = 29.3 Hz); <sup>19</sup>F NMR (471 MHz, CDCl<sub>3</sub>) δ -70.5; HRMS (ESI) *m/z* calculated for C<sub>24</sub>H<sub>15</sub>F<sub>3</sub>NO [M - H]<sup>-</sup> 390.1111, found 390.1116; HPLC: the ee value was determined by HPLC analysis (Chiralpak AS-H, *i*-PrOH/hexane = 15/85, 1.0 mL/min, 227 nm), retention time: *t*<sub>minor</sub> = 13.790 min, *t*<sub>major</sub> = 16.100 min, ee = 92.6%; [α]<sub>D</sub><sup>30</sup> = -96.5 (c = 0.98, CHCl<sub>3</sub>).

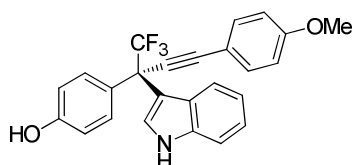

**(S)-4-(1,1,1-Trifluoro-2-(1H-indol-3-yl)-4-(4-methoxyphenyl)but-3-yn-2-yl)phenol (4b)**

It was purified by silica gel chromatography using EtOAc/petroleum ether (1:4). Yield: 89% (37.5 mg). <sup>1</sup>H NMR (600 MHz, CDCl<sub>3</sub>) δ 8.17 (brs, 1H), 7.53 (d, *J* = 8.6 Hz, 2H), 7.43 – 7.31 (m, 5H), 7.18 – 7.15 (m, 1H), 6.99 – 6.95 (m, 1H), 6.82 (d, *J* = 8.9 Hz, 2H), 6.76 (d, *J* = 8.8 Hz, 2H), 3.80 (s, 3H); <sup>13</sup>C NMR (151 MHz, CDCl<sub>3</sub>) δ 160.0, 155.7, 136.6, 133.5, 130.7, 129.3, 125.8 (q, *J* = 284.0 Hz), 125.7, 123.0 (q, *J* = 2.4 Hz), 122.6, 121.3, 120.0, 115.1, 114.8, 114.1, 112.8, 111.3, 86.4, 84.8 (q, *J* = 1.5 Hz), 55.5, 51.2 (q, *J* = 29.1 Hz); <sup>19</sup>F NMR (471 MHz, CDCl<sub>3</sub>) δ -70.7; HRMS (ESI) *m/z* calculated for C<sub>25</sub>H<sub>17</sub>F<sub>3</sub>NO<sub>2</sub> [M - H]<sup>-</sup> 420.1217, found 420.1211; HPLC: the ee value was determined by HPLC analysis (Chiralpak AS-H, *i*-PrOH/hexane = 15/85, 1.0 mL/min, 266 nm), retention time: *t*<sub>minor</sub> = 12.620 min, *t*<sub>major</sub> = 15.593 min, ee = 95.1%; [α]<sub>D</sub><sup>30</sup> = -119.3 (c = 1.00, CHCl<sub>3</sub>).

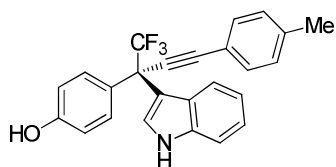

**(S)-4-(1,1,1-Trifluoro-2-(1H-indol-3-yl)-4-(p-tolyl)but-3-yn-2-yl)phenol (4c)**

It was purified by silica gel chromatography using EtOAc/petroleum ether (1:4). Yield: 85% (34.4 mg). <sup>1</sup>H NMR (500 MHz, CD<sub>3</sub>OD) δ 7.42 (d, *J* = 8.7 Hz, 2H), 7.39 – 7.34 (m, 2H), 7.34 – 7.28 (m, 2H), 7.23 – 7.19 (m, 1H), 7.17 – 7.12 (m, 2H), 7.10 – 7.04 (m, 1H), 6.88 – 6.82 (m, 1H), 6.73 (d, *J* = 8.8 Hz, 2H), 2.32 (s, 3H); <sup>13</sup>C NMR (126 MHz, CD<sub>3</sub>OD) δ 158.6, 140.1, 138.3, 132.6, 131.3, 130.2, 129.0, 127.2 (q, *J* = 282.9 Hz), 126.8, 124.2 (q, *J* = 2.5 Hz), 122.7, 121.7, 120.8, 119.9, 115.7, 112.7, 112.4, 87.2, 87.0 (q, *J* = 1.7 Hz), 52.4 (q, *J* = 29.1 Hz), 21.4; <sup>19</sup>F NMR (471 MHz, CD<sub>3</sub>OD) δ -71.9; HRMS (ESI) *m/z* calculated for C<sub>25</sub>H<sub>17</sub>F<sub>3</sub>NO [M - H]<sup>-</sup> 404.1268, found 404.1280; HPLC: the ee value was determined by HPLC analysis (Chiralpak AS-H, *i*-PrOH/hexane = 15/85, 1.0 mL/min, 258 nm), retention time: *t*<sub>minor</sub> = 14.363 min, *t*<sub>major</sub> = 17.240 min, ee = 89.9%; [α]<sub>D</sub><sup>30</sup> = -95.3 (c = 1.00, CHCl<sub>3</sub>).

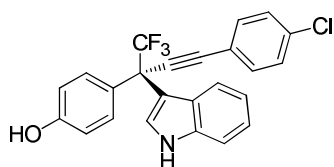

**(S)-4-(4-(4-Chlorophenyl)-1,1,1-trifluoro-2-(1H-indol-3-yl)but-3-yn-2-yl)phenol (4d)**

It was purified by silica gel chromatography using EtOAc/petroleum ether (1:4). Yield: 80% (34.0 mg). <sup>1</sup>H NMR (500 MHz, CDCl<sub>3</sub>) δ 8.20 (brs, 1H), 7.50 (d, *J* = 8.6 Hz, 2H), 7.42 – 7.36 (m, 4H), 7.32 – 7.26 (m, 3H), 7.21 – 7.15 (m, 1H), 7.01 – 6.95 (m, 1H), 6.77 (d, *J* = 8.8 Hz, 2H); <sup>13</sup>C NMR (126 MHz, CDCl<sub>3</sub>) δ 155.6, 136.4, 134.7, 133.1, 130.4, 128.6, 128.6, 125.5 (q, *J* = 284.2 Hz), 125.5, 122.9 (q, *J* = 2.6 Hz), 122.5, 121.0, 120.9, 119.9, 115.0, 112.2, 111.2, 87.1 (q, *J* = 1.5 Hz), 85.18, 51.1 (q, *J* = 29.4 Hz); <sup>19</sup>F NMR (471 MHz, CDCl<sub>3</sub>) δ -70.6; HRMS (ESI) *m/z* calculated for C<sub>24</sub>H<sub>14</sub>ClF<sub>3</sub>NO [M - H]<sup>-</sup> 424.0721, found 424.0715; HPLC: the ee value was determined by HPLC analysis (Chiralpak AS-H, *i*-PrOH/hexane = 15/85, 1.0 mL/min, 253 nm), retention time: *t*<sub>minor</sub> = 12.620 min, *t*<sub>major</sub> = 15.593 min, ee = 91.2%; [α]<sub>D</sub><sup>30</sup> = -125.8 (c = 1.02, CHCl<sub>3</sub>).

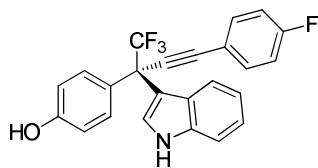

**(S)-4-(1,1,1-Trifluoro-4-(4-fluorophenyl)-2-(1H-indol-3-yl)but-3-yn-2-yl)phenol (4e)**

It was purified by silica gel chromatography using EtOAc/petroleum ether (1:4). Yield: 76% (31.0 mg). <sup>1</sup>H NMR (500 MHz, CDCl<sub>3</sub>) δ 8.19 (brs, 1H), 7.51 (d, *J* = 8.6 Hz, 2H), 7.47 – 7.42 (m, 2H), 7.42 – 7.37 (m, 2H), 7.33 – 7.29 (m, 1H), 7.19 – 7.15 (m, 1H), 7.03 – 6.93 (m, 3H), 6.77 (d, *J* = 8.8 Hz, 2H), 4.83 (brs, 1H); <sup>13</sup>C NMR (126 MHz, CDCl<sub>3</sub>) δ 162.9 (d, *J* = 249.8 Hz), 155.8, 136.6, 134.0 (d, *J* = 8.4 Hz), 130.7, 129.0, 125.7 (q, *J* = 284.0 Hz), 125.7, 123.0 (q, *J* = 2.6 Hz), 122.7, 121.2, 120.1, 118.7 (d, *J* = 3.5 Hz), 115.8 (d, *J* = 22.1 Hz), 115.2, 112.5, 111.4, 86.0 (q, *J* = 1.6 Hz), 85.5, 51.2 (q, *J* = 29.1 Hz); <sup>19</sup>F NMR (471 MHz, CDCl<sub>3</sub>) δ -70.7, -110.4; HRMS (ESI) *m/z* calculated for C<sub>24</sub>H<sub>14</sub>F<sub>4</sub>NO [M - H]<sup>-</sup> 408.1017, found 408.1008; HPLC: the ee value was determined by HPLC analysis (Chiralpak AS-H, *i*-PrOH/hexane = 15/85, 1.0 mL/min, 215 nm), retention time: *t*<sub>minor</sub> = 13.690 min, *t*<sub>major</sub> = 16.470 min, ee = 95.8%; [α]<sub>D</sub><sup>30</sup> = -105.5 (c = 0.98, CHCl<sub>3</sub>).



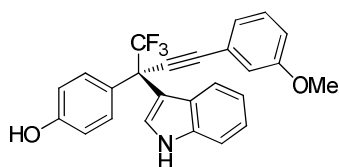

**(S)-4-(1,1,1-Trifluoro-2-(1H-indol-3-yl)-4-(3-methoxyphenyl)but-3-yn-2-yl)phenol (4f)**

It was purified by silica gel chromatography using EtOAc/petroleum ether (1:4). Yield: 85% (35.6 mg). <sup>1</sup>H NMR (500 MHz, CDCl<sub>3</sub>) δ 8.17 (brs, 1H), 7.53 (d, *J* = 8.6 Hz, 2H), 7.40 – 7.33 (m, 3H), 7.23 – 7.15 (m, 2H), 7.10 – 7.06 (m, 1H), 7.01 – 6.96 (m, 2H), 6.90 – 6.86 (m, 1H), 6.76 (d, *J* = 8.8 Hz, 2H), 4.92 (brs, 1H), 3.77 (s, 3H); <sup>13</sup>C NMR (126 MHz, CDCl<sub>3</sub>) δ 159.5, 155.7, 136.6, 130.7, 129.6, 129.0, 125.8 (q, *J* = 284.3 Hz), 125.7, 124.7, 123.6, 123.1 (q, *J* = 2.7 Hz), 122.7, 121.3, 120.1, 116.9, 115.5, 115.2, 112.6, 111.4, 86.4, 86.1 (q, *J* = 1.7 Hz), 55.5, 51.3 (q, *J* = 29.3 Hz); <sup>19</sup>F NMR (471 MHz, CDCl<sub>3</sub>) δ -70.6; HRMS (ESI) *m/z* calculated for C<sub>25</sub>H<sub>17</sub>F<sub>3</sub>NO<sub>2</sub> [M - H]<sup>-</sup> 420.1217, found 420.1222; HPLC: the ee value was determined by HPLC analysis (Chiralpak AS-H, *i*-PrOH/hexane = 15/85, 1.0 mL/min, 225nm), retention time: *t*<sub>minor</sub> = 16.943 min, *t*<sub>major</sub> = 19.467 min, ee = 92.3%; [α]<sub>D</sub><sup>30</sup> = -113.6 (c = 0.99, CHCl<sub>3</sub>).

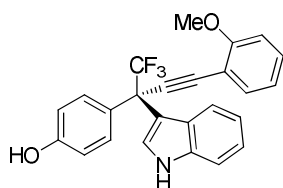

**(S)-4-(1,1,1-Trifluoro-2-(1H-indol-3-yl)-4-(2-methoxyphenyl)but-3-yn-2-yl)phenol (4g)**

It was purified by silica gel chromatography using EtOAc/petroleum ether (1:4). Yield: 81% (34.0 mg). <sup>1</sup>H NMR (600 MHz, CDCl<sub>3</sub>) δ 8.16 (brs, 1H), 7.60 (d, *J* = 8.6 Hz, 2H), 7.45 – 7.38 (m, 3H), 7.36 – 7.33 (m, 1H), 7.30 – 7.26 (m, 1H), 7.17 – 7.13 (m, 1H), 6.98 – 6.95 (m, 1H), 6.89 – 6.85 (m, 2H), 6.76 (d, *J* = 8.8 Hz, 2H), 3.85 (s, 3H); <sup>13</sup>C NMR (151 MHz, CDCl<sub>3</sub>) δ 160.9, 155.6, 136.6, 133.7, 130.8, 130.2, 129.3, 125.8 (q, *J* = 284.3 Hz), 125.7, 123.1 (q, *J* = 2.4 Hz), 122.5, 121.7, 120.5, 119.9, 115.1, 112.7, 112.1, 111.2, 111.0, 90.1 (q, *J* = 1.4 Hz), 83.1, 56.0, 51.4 (q, *J* = 29.2 Hz); <sup>19</sup>F NMR (471 MHz, CDCl<sub>3</sub>) δ -70.5; HRMS (ESI) *m/z* calculated for C<sub>25</sub>H<sub>17</sub>F<sub>3</sub>NO<sub>2</sub> [M - H]<sup>-</sup> 420.1217, found 420.1219; HPLC: the ee value was determined by HPLC analysis (Chiralpak AS-H, *i*-PrOH/hexane = 15/85, 1.0 mL/min, 291 nm), retention time: *t*<sub>minor</sub> = 23.080 min, *t*<sub>major</sub> = 26.093 min, ee = 96.2%; [α]<sub>D</sub><sup>30</sup> = -79.4 (c = 0.99, CHCl<sub>3</sub>).

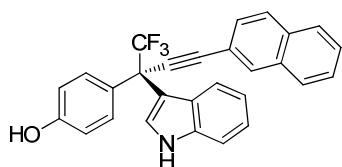

**(S)-4-(1,1,1-Trifluoro-2-(1H-indol-3-yl)-4-(naphthalen-2-yl)but-3-yn-2-yl)phenol (4h)**

It was purified by silica gel chromatography using EtOAc/petroleum ether (1:4). Yield: 67% (29.5 mg).  $^1\text{H}$  NMR (500 MHz,  $\text{CDCl}_3$ )  $\delta$  8.17 (brs, 1H), 8.00 (s, 1H), 7.81 – 7.74 (m, 3H), 7.58 (d,  $J = 8.6$  Hz, 2H), 7.53 – 7.46 (m, 3H), 7.44 – 7.35 (m, 3H), 7.22 – 7.16 (m, 1H), 7.04 – 6.99 (m, 1H), 6.78 (d,  $J = 8.8$  Hz, 2H), 4.99 (brs, 1H);  $^{13}\text{C}$  NMR (126 MHz,  $\text{CDCl}_3$ )  $\delta$  155.8, 136.6, 133.2, 133.1, 132.1, 130.7, 129.1, 128.7, 128.1, 128.0, 128.0, 127.0, 126.8, 125.8 (q,  $J = 284.3$  Hz), 125.7, 123.1 (q,  $J = 2.2$  Hz), 122.7, 121.3, 120.1, 119.9, 115.2, 112.6, 111.4, 86.9, 86.5 (q,  $J = 1.6$  Hz), 51.3 (q,  $J = 29.4$  Hz);  $^{19}\text{F}$  NMR (471 MHz,  $\text{CDCl}_3$ )  $\delta$  -70.5; HRMS (ESI)  $m/z$  calculated for  $\text{C}_{28}\text{H}_{17}\text{F}_3\text{NO}$  [ $\text{M} - \text{H}$ ] $^-$  440.1268, found 440.1257; HPLC: the ee value was determined by HPLC analysis (Chiralpak AS-H, *i*-PrOH/hexane = 20/80, 1.0 mL/min, 290 nm), retention time:  $t_{\text{minor}} = 10.457$  min,  $t_{\text{major}} = 12.797$  min, ee = 92.1%;  $[\alpha]_{\text{D}}^{30} = -63.7$  ( $c = 1.03$ ,  $\text{CHCl}_3$ ).

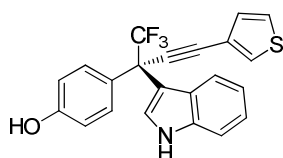

**(S)-4-(1,1,1-Trifluoro-2-(1H-indol-3-yl)-4-(thiophen-3-yl)but-3-yn-2-yl)phenol (4i)**

It was purified by silica gel chromatography using EtOAc/petroleum ether (1:4). Yield: 83% (32.8 mg).  $^1\text{H}$  NMR (500 MHz,  $\text{CDCl}_3$ )  $\delta$  8.18 (brs, 1H), 7.51 (d,  $J = 8.6$  Hz, 2H), 7.49 – 7.45 (m, 1H), 7.40 – 7.35 (m, 2H), 7.34 – 7.30 (m, 1H), 7.26 – 7.23 (m, 1H), 7.19 – 7.15 (m, 1H), 7.14 – 7.11 (m, 1H), 7.00 – 6.95 (m, 1H), 6.76 (d,  $J = 8.8$  Hz, 2H);  $^{13}\text{C}$  NMR (126 MHz,  $\text{CDCl}_3$ )  $\delta$  155.8, 136.6, 130.7, 130.2, 129.6, 129.0, 125.7 (q,  $J = 284.2$  Hz), 125.7, 125.5, 123.1 (q,  $J = 2.7$  Hz), 122.6, 121.6, 121.3, 120.1, 115.2, 112.5, 111.4, 85.8 (q,  $J = 1.6$  Hz), 81.7, 51.3 (q,  $J = 29.4$  Hz);  $^{19}\text{F}$  NMR (471 MHz,  $\text{CDCl}_3$ )  $\delta$  -70.6; HRMS (ESI)  $m/z$  calculated for  $\text{C}_{22}\text{H}_{13}\text{F}_3\text{NOS}$  [ $\text{M} - \text{H}$ ] $^-$  396.0675, found 396.0683; HPLC: the ee value was determined by HPLC analysis (Chiralpak AS-H, *i*-PrOH/hexane = 15/85, 1.0 mL/min, 215 nm), retention time:  $t_{\text{minor}} = 20.300$  min,  $t_{\text{major}} = 22.877$  min, ee = 96.2%;  $[\alpha]_{\text{D}}^{30} = -93.8$  ( $c = 0.98$ ,  $\text{CHCl}_3$ ).

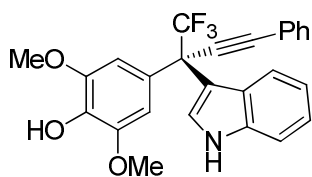

**(S)-2,6-Dimethoxy-4-(1,1,1-trifluoro-2-(1*H*-indol-3-yl)-4-phenylbut-3-yn-2-yl)phenol (4j)**

It was purified by silica gel chromatography using EtOAc/petroleum ether (1:4). Yield: 63% (28.5 mg).  $^1\text{H}$  NMR (500 MHz,  $\text{CDCl}_3$ )  $\delta$  8.27 (brs, 1H), 7.50 – 7.45 (m, 2H), 7.43 – 7.35 (m, 3H), 7.35 – 7.27 (m, 3H), 7.19 – 7.15 (m, 1H), 7.03 – 6.98 (m, 1H), 6.96 (s, 2H), 5.59 (brs, 1H), 3.78 (s, 6H);  $^{13}\text{C}$  NMR (126 MHz,  $\text{CDCl}_3$ )  $\delta$  146.7, 136.6, 135.1, 132.0, 128.9, 128.5, 127.8, 125.8 (q,  $J = 284.4$  Hz), 125.8, 123.2 (q,  $J = 2.5$  Hz), 122.6, 122.6, 121.3, 120.1, 112.4, 111.4, 106.7, 86.7, 86.2, 56.6, 51.9 (q,  $J = 29.4$  Hz);  $^{19}\text{F}$  NMR (471 MHz,  $\text{CDCl}_3$ )  $\delta$  -70.2; HRMS (ESI)  $m/z$  calculated for  $\text{C}_{26}\text{H}_{19}\text{F}_3\text{NO}_3$  [ $\text{M} - \text{H}$ ] $^-$  450.1323, found 450.1327; HPLC: the the ee value was determined by HPLC analysis (Chiralpak IG, *i*-PrOH/hexane = 20/80, 1.0 mL/min, 220 nm), retention time:  $t_{\text{minor}} = 7.267$  min,  $t_{\text{minor}} = 10.190$  min, ee = 83.0%;  $[\alpha]_{\text{D}}^{30} = -9.6$  ( $c = 1.04$ ,  $\text{CHCl}_3$ ).

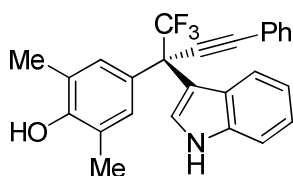

**(S)-2,6-Dimethyl-4-(1,1,1-trifluoro-2-(1*H*-indol-3-yl)-4-phenylbut-3-yn-2-yl)phenol (4k)**

It was purified by silica gel chromatography using EtOAc/petroleum ether (1:4). Yield: 76% (32.0 mg).  $^1\text{H}$  NMR (500 MHz,  $\text{CDCl}_3$ )  $\delta$  8.14 (brs, 1H), 7.52 – 7.47 (m, 2H), 7.46 – 7.43 (m, 1H), 7.39 – 7.35 (m, 2H), 7.34 – 7.27 (m, 5H), 7.20 – 7.15 (m, 1H), 7.03 – 6.98 (m, 1H), 4.65 (brs, 1H), 2.20 (s, 6H);  $^{13}\text{C}$  NMR (126 MHz,  $\text{CDCl}_3$ )  $\delta$  152.4, 136.6, 132.1, 129.3, 128.7, 128.4, 128.0, 125.9 (q,  $J = 284.2$  Hz), 125.8, 123.0 (q,  $J = 2.3$  Hz), 122.8, 122.7, 122.5, 121.4, 120.0, 112.8, 111.3, 86.5 (q,  $J = 1.1$  Hz), 86.4, 51.3 (q,  $J = 28.1$  Hz), 16.3;  $^{19}\text{F}$  NMR (471 MHz,  $\text{CDCl}_3$ )  $\delta$  -70.4; HRMS (ESI)  $m/z$  calculated for  $\text{C}_{26}\text{H}_{19}\text{F}_3\text{NO}$  [ $\text{M} - \text{H}$ ] $^-$  418.1424, found 418.1432; HPLC: the the ee value was determined by HPLC analysis (Chiralpak IG, *i*-PrOH/hexane = 5/95, 1.0 mL/min, 241 nm), retention time:  $t_{\text{minor}} = 10.850$  min,  $t_{\text{major}} = 16.043$  min, ee = 90.5%;  $[\alpha]_{\text{D}}^{30} = -67.4$  ( $c = 0.99$ ,  $\text{CHCl}_3$ ).

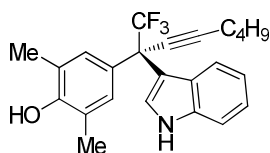

**(S)-2,6-Dimethyl-4-(1,1,1-trifluoro-2-(1*H*-indol-3-yl)oct-3-yn-2-yl)phenol (4l)**

It was prepared using **3b** with 1.1 equiv of **2a** without  $K_2CO_3$  additive and asymmetric nucleophilic addition was performed at 0 °C. Then it was purified by silica gel chromatography using EtOAc/petroleum ether (1:4). Yield: 73% (29.3 mg).  $^1H$  NMR (500 MHz,  $CDCl_3$ )  $\delta$  8.08 (brs, 1H), 7.37 – 7.28 (m, 3H), 7.22 (s, 2H), 7.19 – 7.13 (m, 1H), 7.00 – 6.94 (m, 1H), 2.31 (t,  $J = 7.0$  Hz, 2H), 2.19 (s, 6H), 1.61 – 1.52 (m, 2H), 1.51 – 1.41 (m, 2H), 0.92 (t,  $J = 7.3$  Hz, 3H);  $^{13}C$  NMR (126 MHz,  $CDCl_3$ )  $\delta$  152.2, 136.6, 129.4, 128.5, 126.0 (q,  $J = 283.9$  Hz), 125.8, 122.8 (q,  $J = 2.5$  Hz), 122.5, 122.4, 121.6, 119.7, 113.4, 111.2, 77.32 – 77.28 (m), 87.2, 50.6 (q,  $J = 28.7$  Hz), 30.7, 22.1, 18.7, 16.3, 13.8;  $^{19}F$  NMR (471 MHz,  $CDCl_3$ )  $\delta$  -70.8; HRMS (ESI)  $m/z$  calculated for  $C_{24}H_{23}F_3NO$  [ $M - H$ ] 398.1737, found 398.1746; HPLC: the ee value was determined by HPLC analysis (Chiralpak IG, *i*-PrOH/hexane = 5/95, 1.0 mL/min, 254 nm), retention time:  $t_{major} = 7.550$  min,  $t_{minor} = 8.260$  min, ee = 92.7%;  $[\alpha]_D^{30} = +32.2$  (c = 0.96,  $CHCl_3$ ).

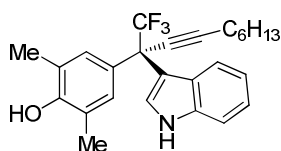

**(S)-2,6-Dimethyl-4-(1,1,1-trifluoro-2-(1*H*-indol-3-yl)dec-3-yn-2-yl)phenol (4m)**

It was prepared using **3b** with 1.1 equiv of **2a** without  $K_2CO_3$  additive and asymmetric nucleophilic addition was performed at 0 °C. Then it was purified by silica gel chromatography using EtOAc/petroleum ether (1:4). Yield: 71% (30.2 mg).  $^1H$  NMR (500 MHz,  $CDCl_3$ )  $\delta$  8.07 (brs, 1H), 7.37 – 7.29 (m, 3H), 7.22 (s, 2H), 7.19 – 7.14 (m, 1H), 7.00 – 6.94 (m, 1H), 4.64 (brs, 1H), 2.32 – 2.28 (m, 2H), 2.19 (s, 6H), 1.61 – 1.54 (m, 2H), 1.47 – 1.40 (m, 2H), 1.33 – 1.27 (m, 4H), 0.92 – 0.87 (m, 3H);  $^{13}C$  NMR (126 MHz,  $CDCl_3$ )  $\delta$  152.2, 136.6, 129.4, 128.5, 126.0 (q,  $J = 283.9$  Hz), 125.8, 122.8 (q,  $J = 2.4$  Hz), 122.5, 122.4, 121.5, 119.7, 113.4, 111.2, 87.3, 77.35 – 77.30 (m), 50.6 (q,  $J = 29.0$  Hz), 31.5, 28.7, 28.6, 22.8, 19.1, 16.3, 14.2;  $^{19}F$  NMR (471 MHz,  $CDCl_3$ )  $\delta$  -70.8; HRMS (ESI)  $m/z$  calculated for  $C_{26}H_{27}F_3NO$  [ $M - H$ ] 426.2050, found 426.2062; HPLC: the ee

value was determined by HPLC analysis (Chiralpak IG, *i*-PrOH/hexane = 3/97, 1.0 mL/min, 215 nm), retention time:  $t_{\text{major}}=11.460$  min,  $t_{\text{minor}}=13.030$ min, ee = 91.2%;  $[\alpha]_{\text{D}}^{30} = +27.1$  (c = 1.03, CHCl<sub>3</sub>).

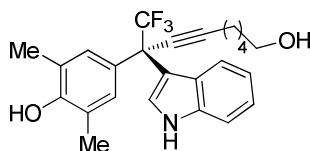

**(S)-2,6-Dimethyl-4-(1,1,1-trifluoro-6-hydroxy-2-(1H-indol-3-yl)hex-3-yn-2-yl)phenol (4n)**

It was prepared using **3b** with 1.1 equiv of **2a** without K<sub>2</sub>CO<sub>3</sub> additive and asymmetric nucleophilic addition was performed at 0 °C. Then it was purified by silica gel chromatography using EtOAc/petroleum ether (1:4). Yield: 70% (30.1 mg). <sup>1</sup>H NMR (500 MHz, CDCl<sub>3</sub>) δ 8.18 (brs, 1H), 7.35 – 7.28 (m, 3H), 7.20 (s, 2H), 7.17 – 7.12 (m, *J* = 7.5 Hz, 1H), 6.98 – 6.93 (m, *J* = 7.6 Hz, 1H), 3.55 (t, *J* = 6.5 Hz, 2H), 2.32 (t, *J* = 6.8 Hz, 2H), 2.18 (s, 6H), 1.62 – 1.49 (m, 4H), 1.48 – 1.40 (m, 2H); <sup>13</sup>C NMR (126 MHz, CDCl<sub>3</sub>) δ 152.3, 136.6, 129.3, 128.4, 126.0 (q, *J* = 284.1 Hz), 125.8, 122.8 (q, *J* = 2.3 Hz), 122.6, 122.4, 121.5, 119.6, 113.3, 111.3, 86.8, 77.7 (q, *J* = 1.8 Hz), 63.0, 50.6 (q, *J* = 28.4 Hz), 32.4, 28.3, 25.0, 19.0, 16.3; <sup>19</sup>F NMR (471 MHz, CDCl<sub>3</sub>) δ -70.8; HRMS (ESI) *m/z* calculated for C<sub>25</sub>H<sub>25</sub>F<sub>3</sub>NO<sub>2</sub> [M - H]<sup>-</sup> 428.1843, found 428.1840; HPLC: the ee value was determined by HPLC analysis (Chiralpak AD-H, *i*-PrOH/hexane = 20/80, 1.0 mL/min, 220 nm), retention time:  $t_{\text{minor}}=7.697$  min,  $t_{\text{major}}=9.317$ min, ee = 91.2%;  $[\alpha]_{\text{D}}^{30} = +50.8$  (c = 1.01, CHCl<sub>3</sub>).

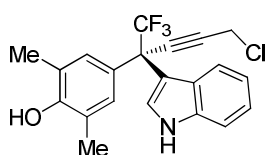

**(S)-4-(5-Chloro-1,1,1-trifluoro-2-(1H-indol-3-yl)pent-3-yn-2-yl)-2,6-dimethylphenol (4o)**

It was prepared using **3b** with 1.1 equiv of **2a** without K<sub>2</sub>CO<sub>3</sub> additive. Then it was purified by silica gel chromatography using EtOAc/petroleum ether (1:4). Yield: 66% (25.7 mg). <sup>1</sup>H NMR (500 MHz, CDCl<sub>3</sub>) δ 8.12 (brs, 1H), 7.37 – 7.32 (m, 2H), 7.29 (d, *J* = 8.1 Hz, 1H), 7.22 – 7.15 (m, 3H), 7.03 – 6.97 (m, 1H), 4.22 (d, *J* = 2.7 Hz, 2H), 2.19 (s, 6H); <sup>13</sup>C NMR (126 MHz, CDCl<sub>3</sub>) δ 152.5, 136.5, 129.2, 127.3, 125.6 (q, *J* = 284.3 Hz), 125.6, 123.2 (q, *J* = 2.6 Hz), 122.8, 122.6, 121.3, 120.1, 112.1, 111.4, 83.8 (q, *J* = 1.7 Hz), 81.2, 50.8 (q, *J* = 29.2 Hz), 30.7, 16.3; <sup>19</sup>F NMR (471 MHz, CDCl<sub>3</sub>) δ -70.3; HRMS (ESI) *m/z* calculated for C<sub>21</sub>H<sub>16</sub>ClF<sub>3</sub>NO [M - H]<sup>-</sup> 390.0878, found 390.0887; HPLC:

the ee value was determined by HPLC analysis (Chiralpak AS-H, *i*-PrOH/hexane = 15/85, 1.0 mL/min, 225 nm), retention time:  $t_{\text{major}}=15.707$  min,  $t_{\text{minor}}=19.847$ min, ee = 86.2%;  $[\alpha]_{\text{D}}^{30} = +42.8$  ( $c = 1.00$ ,  $\text{CHCl}_3$ ).

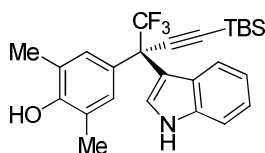

**(*R*)-4-(4-(*tert*-Butyldimethylsilyl)-1,1,1-trifluoro-2-(1*H*-indol-3-yl)but-3-yn-2-yl)-2,6-dimethylphenol (4p)**

It was prepared using **3b** with 1.1 equiv of **2a** without  $\text{K}_2\text{CO}_3$  additive. Then it was purified by silica gel chromatography using EtOAc/petroleum ether (1:4). Yield: 70% (31.8 mg).  $^1\text{H}$  NMR (500 MHz,  $\text{CDCl}_3$ )  $\delta$  7.94 (brs, 1H), 7.42 (d,  $J = 8.1$  Hz, 1H), 7.30 – 7.21 (m, 4H), 7.20 – 7.14 (m, 1H), 7.04 – 6.96 (m, 1H), 2.19 (s, 6H), 1.01 (s, 9H), 0.15 (s, 3H), 0.13 (s, 3H);  $^{13}\text{C}$  NMR (126 MHz,  $\text{CDCl}_3$ )  $\delta$  152.3, 136.5, 129.4, 127.9, 125.7 (q,  $J = 284.2$  Hz), 125.6, 123.1 (q,  $J = 2.5$  Hz), 122.6, 122.5, 121.6, 119.7, 112.2, 111.3, 102.9, 90.2, 51.5 (q,  $J = 28.8$  Hz), 26.3, 17.0, 16.3, -4.7, -4.7;  $^{19}\text{F}$  NMR (471 MHz,  $\text{CDCl}_3$ )  $\delta$  -70.5; HRMS (ESI)  $m/z$  calculated for  $\text{C}_{26}\text{H}_{29}\text{F}_3\text{NOSi}$   $[\text{M} - \text{H}]^-$  456.1976, found 456.1968; HPLC: the ee value was determined by HPLC analysis (ChiralcelOD-H, *i*-PrOH/hexane = 5/95, 1.0 mL/min, 254 nm), retention time:  $t_{\text{major}}=12.580$  min,  $t_{\text{minor}}=14.453$ min, ee = 93.1%;  $[\alpha]_{\text{D}}^{30} = +60.8$  ( $c = 1.02$ ,  $\text{CHCl}_3$ ).

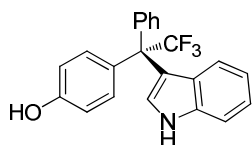

**(*S*)-4-(2,2,2-Trifluoro-1-(1*H*-indol-3-yl)-1-phenylethyl)phenol (6a)**

It was prepared using **3d** with 1.1 equiv of **2a** without  $\text{K}_2\text{CO}_3$  additive. Then it was purified by silica gel chromatography using EtOAc/petroleum ether (1:4). Yield: 77% (28.2 mg).  $^1\text{H}$  NMR (500 MHz,  $\text{CD}_3\text{OD}$ )  $\delta$  7.36 (d,  $J = 8.2$  Hz, 1H), 7.32 – 7.23 (m, 5H), 7.10 (d,  $J = 8.7$  Hz, 2H), 7.07 – 7.03 (m, 1H), 6.89 (d,  $J = 8.2$  Hz, 1H), 6.82 – 6.78 (m, 1H), 6.72 (d,  $J = 8.9$  Hz, 2H), 6.68 (s, 1H);  $^{13}\text{C}$  NMR (126 MHz,  $\text{CD}_3\text{OD}$ )  $\delta$  157.8, 141.7, 138.6, 132.1, 131.9, 130.8, 129.7 (q,  $J = 285.8$  Hz), 128.8, 128.4, 128.0, 127.6, 122.9, 122.5, 119.9, 116.3, 115.5, 112.4, 61.1 (q,  $J = 25.0$  Hz);  $^{19}\text{F}$  NMR (471 MHz,

CD<sub>3</sub>OD)  $\delta$  -61.9; HRMS (ESI)  $m/z$  calculated for C<sub>22</sub>H<sub>15</sub>F<sub>3</sub>NO [M - H]<sup>-</sup> 366.1111, found 366.1123; HPLC: the ee value was determined by HPLC analysis (Chiralpak AD-H, *i*-PrOH/hexane = 10/90, 1.0 mL/min, 227 nm), retention time:  $t_{\text{major}} = 20.460$  min,  $t_{\text{minor}} = 24.720$  min, ee = 93.2%;  $[\alpha]_{\text{D}}^{30} = -1.8$  ( $c = 0.97$ , CHCl<sub>3</sub>).

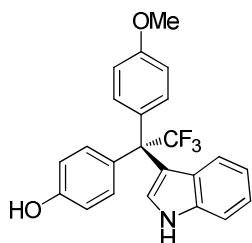

**(R)-4-(2,2,2-Trifluoro-1-(1H-indol-3-yl)-1-(4-methoxyphenyl)ethyl)phenol (6b)**

It was prepared using **3d** with 1.1 equiv of **2a** without K<sub>2</sub>CO<sub>3</sub> additive. Then it was purified by silica gel chromatography using EtOAc/petroleum ether (1:4). Yield: 70% (27.8 mg). <sup>1</sup>H NMR (500 MHz, DMSO-*d*<sub>6</sub>)  $\delta$  11.20 (brs, 1H), 9.57 (brs, 1H), 7.40 (d,  $J = 8.2$  Hz, 1H), 7.12 (d,  $J = 8.8$  Hz, 2H), 7.07 – 7.02 (m, 1H), 7.00 (d,  $J = 8.7$  Hz, 2H), 6.91 (d,  $J = 9.1$  Hz, 2H), 6.83 – 6.79 (m, 1H), 6.77 – 6.71 (m, 4H), 3.75 (s, 3H); <sup>13</sup>C NMR (126 MHz, DMSO-*d*<sub>6</sub>)  $\delta$  158.3, 156.6, 136.9, 131.5, 130.3, 129.6, 129.6, 128.3 (q,  $J = 286.3$  Hz), 126.8, 125.8, 121.1, 121.1, 118.8, 114.8, 114.2, 113.4, 111.9, 58.5 (q,  $J = 24.3$  Hz), 55.0; <sup>19</sup>F NMR (471 MHz, DMSO-*d*<sub>6</sub>)  $\delta$  -60.5; HRMS (ESI)  $m/z$  calculated for C<sub>23</sub>H<sub>17</sub>F<sub>3</sub>NO<sub>2</sub> [M - H]<sup>-</sup> 396.1217, found 396.1211; HPLC: the ee value was determined by HPLC analysis (Chiralpak AD-H, *i*-PrOH/hexane = 20/80, 1.0 mL/min, 230 nm), retention time:  $t_{\text{major}} = 8.960$  min,  $t_{\text{minor}} = 10.687$  min, ee = 91.2%;  $[\alpha]_{\text{D}}^{30} = -1.6$  ( $c = 0.11$ , CHCl<sub>3</sub>).

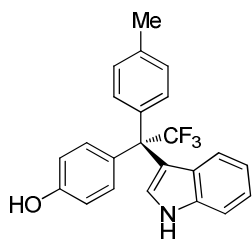

**(S)-4-(2,2,2-Trifluoro-1-(1H-indol-3-yl)-1-(*p*-tolyl)ethyl)phenol (6c)**

It was prepared using **3d** with 1.1 equiv of **2a** without K<sub>2</sub>CO<sub>3</sub> additive. Then it was purified by silica gel chromatography using EtOAc/petroleum ether (1:4). Yield: 67% (25.7 mg). <sup>1</sup>H NMR (500 MHz, CD<sub>3</sub>OD)  $\delta$  7.35 (d,  $J = 8.2$  Hz, 1H), 7.19 – 7.15 (m, 2H), 7.11 – 7.02 (m, 5H), 6.91 – 6.87 (m, 1H), 6.81 – 6.77 (m, 1H), 6.72 – 6.66 (m, 3H), 2.32 – 2.28 (m, 3H); <sup>13</sup>C NMR (126 MHz, CD<sub>3</sub>OD)  $\delta$

157.7, 138.7, 138.6, 138.2, 132.2, 132.1, 130.7, 129.8 (q,  $J = 285.5$  Hz), 129.5, 127.9, 127.7, 123.0, 122.4, 119.9, 116.5, 115.5, 112.4, 60.8 (q,  $J = 24.6$  Hz), 20.9;  $^{19}\text{F}$  NMR (471 MHz,  $\text{CD}_3\text{OD}$ )  $\delta$  -61.9; HRMS (ESI)  $m/z$  calculated for  $\text{C}_{23}\text{H}_{17}\text{F}_3\text{NO}$   $[\text{M} - \text{H}]^-$  380.1268, found 380.1263; HPLC: the ee value was determined by HPLC analysis (Chiralpak AD-H,  $i$ -PrOH/hexane = 15/85, 0.3 mL/min, 215 nm), retention time:  $t_{\text{major}} = 36.220$  min,  $t_{\text{minor}} = 38.910$  min, ee = 90.3%;  $[\alpha]_{\text{D}}^{30} = -2.3$  ( $c = 1.04$ ,  $\text{CHCl}_3$ ).

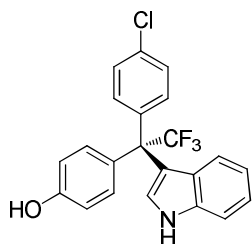

**(*R*)-4-(1-(4-Chlorophenyl)-2,2,2-trifluoro-1-(1*H*-indol-3-yl)ethyl)phenol (6d)**

It was prepared using **3d** with 1.1 equiv of **2a** without  $\text{K}_2\text{CO}_3$  additive. Then it was purified by silica gel chromatography using EtOAc/petroleum ether (1:4). Yield: 62% (24.7 mg).  $^1\text{H}$  NMR (500 MHz,  $\text{CD}_3\text{OD}$ )  $\delta$  7.36 (d,  $J = 8.2$  Hz, 1H), 7.30 – 7.27 (m, 4H), 7.11 – 7.04 (m, 3H), 6.88 – 6.80 (m, 2H), 6.74 – 6.69 (m, 3H);  $^{13}\text{C}$  NMR (126 MHz,  $\text{CD}_3\text{OD}$ )  $\delta$  158.1, 140.5, 138.6, 134.6, 132.5, 132.0, 131.4, 129.53 (q,  $J = 285.6$  Hz), 129.0, 128.0, 127.4, 122.7, 122.6, 120.1, 115.8, 115.7, 112.5, 60.8 (q,  $J = 25.1$  Hz);  $^{19}\text{F}$  NMR (471 MHz,  $\text{CD}_3\text{OD}$ )  $\delta$  -61.8; HRMS (ESI)  $m/z$  calculated for  $\text{C}_{22}\text{H}_{14}\text{ClF}_3\text{NO}$   $[\text{M} - \text{H}]^-$  400.0721, found 400.0713; HPLC: the ee value was determined by HPLC analysis (Chiralpak AD-H,  $i$ -PrOH/hexane = 15/85, 0.8 mL/min, 215 nm), retention time:  $t_{\text{major}} = 10.847$  min,  $t_{\text{minor}} = 12.213$  min, ee = 91.0%;  $[\alpha]_{\text{D}}^{30} = -4.1$  ( $c = 1.00$ ,  $\text{CHCl}_3$ ).

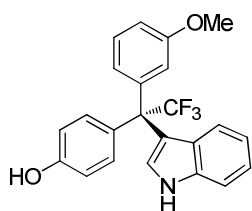

**(*R*)-4-(2,2,2-Trifluoro-1-(1*H*-indol-3-yl)-1-(3-methoxyphenyl)ethyl)phenol (6e)**

It was prepared using **3d** with 1.1 equiv of **2a** without  $\text{K}_2\text{CO}_3$  additive. Then it was purified by silica gel chromatography using EtOAc/petroleum ether (1:4). Yield: 58% (23.0 mg).  $^1\text{H}$  NMR (500 MHz,  $\text{CD}_3\text{OD}$ )  $\delta$  7.36 (d,  $J = 8.2$  Hz, 1H), 7.23 – 7.16 (m, 1H), 7.12 – 7.03 (m, 3H), 6.94 – 6.88 (m, 2H), 6.88 – 6.79 (m, 3H), 6.73 – 6.69 (m, 3H), 3.63 – 3.60 (m, 3H);  $^{13}\text{C}$  NMR (126 MHz,  $\text{CD}_3\text{OD}$ )  $\delta$



160.7, 157.8, 143.2, 138.6, 132.1, 131.9, 129.7, 129.7 (q,  $J = 285.6$  Hz), 128.0, 127.6, 123.2, 122.9, 122.5, 119.9, 117.4, 116.2, 115.5, 113.4, 112.4, 61.1 (q,  $J = 25.3$  Hz), 55.5;  $^{19}\text{F}$  NMR (471 MHz,  $\text{CD}_3\text{OD}$ )  $\delta$  -61.8; HRMS (ESI)  $m/z$  calculated for  $\text{C}_{23}\text{H}_{17}\text{F}_3\text{NO}_2$  [ $\text{M} - \text{H}$ ] 396.1217, found 396.1219; HPLC: the ee value was determined by HPLC analysis (Chiralpak AD-H, *i*-PrOH/hexane = 15/85, 1.0 mL/min, 232 nm), retention time:  $t_{\text{major}} = 11.793$  min,  $t_{\text{minor}} = 13.543$  min, ee = 91.0%;  $[\alpha]_{\text{D}}^{30} = -1.2$  ( $c = 0.92$ ,  $\text{CHCl}_3$ ).

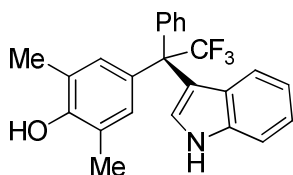

#### (*S*)-2,6-Dimethyl-4-(2,2,2-trifluoro-1-(1*H*-indol-3-yl)-1-phenylethyl)phenol (**6f**)

It was prepared using **3d** with 1.1 equiv of **2a** without  $\text{K}_2\text{CO}_3$  additive. Then it was purified by silica gel chromatography using EtOAc/petroleum ether (1:4). Yield: 77% (30.3 mg).  $^1\text{H}$  NMR (500 MHz,  $\text{CDCl}_3$ )  $\delta$  8.11 (brs, 1H), 7.38 – 7.30 (m, 6H), 7.19 – 7.15 (m, 1H), 7.06 – 7.02 (m, 1H), 6.97 – 6.91 (m, 3H), 6.70 – 6.67 (m, 1H), 2.16 (s, 6H);  $^{13}\text{C}$  NMR (126 MHz,  $\text{CDCl}_3$ )  $\delta$  151.7, 140.3, 136.9, 131.4, 130.2 (q,  $J = 2.0$  Hz), 129.9 (q,  $J = 2.0$  Hz), 128.4 (q,  $J = 286.6$  Hz), 128.1, 127.6, 126.9, 126.6, 122.7 (q,  $J = 3.0$  Hz), 122.5, 122.3, 120.0, 116.7, 111.3, 60.1 (q,  $J = 25.0$  Hz), 16.4;  $^{19}\text{F}$  NMR (471 MHz,  $\text{CDCl}_3$ )  $\delta$  -60.3; HRMS (ESI)  $m/z$  calculated for  $\text{C}_{24}\text{H}_{19}\text{F}_3\text{NO}$  [ $\text{M} - \text{H}$ ] 394.1424, found 394.1432; HPLC: the ee value was determined by HPLC analysis (Chiralpak AD-H, *i*-PrOH/hexane = 10/90, 1.0 mL/min, 215 nm), retention time:  $t_{\text{major}} = 13.397$  min,  $t_{\text{minor}} = 14.537$  min, ee = 96.5%;  $[\alpha]_{\text{D}}^{30} = -3.6$  ( $c = 1.01$ ,  $\text{CHCl}_3$ ).

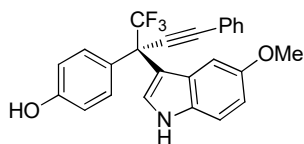

#### (*S*)-4-(1,1,1-Trifluoro-2-(5-methoxy-1*H*-indol-3-yl)-4-phenylbut-3-yn-2-yl)phenol (**7a**)

It was purified by silica gel chromatography using EtOAc/petroleum ether (1:4). Yield: 88% (37.1mg).  $^1\text{H}$  NMR (500 MHz,  $\text{CDCl}_3$ )  $\delta$  8.1 (brs, 1H), 7.55 – 7.51 (m, 2H), 7.50 – 7.46 (m, 2H), 7.38 – 7.35 (m, 1H), 7.33 – 7.28 (m, 3H), 7.26 – 7.24 (m, 1H), 6.85 – 6.81 (m, 1H), 6.79 – 6.75 (m, 3H), 3.61 (s, 3H);  $^{13}\text{C}$  NMR (126 MHz,  $\text{CDCl}_3$ )  $\delta$  155.5, 153.8, 131.9, 131.5, 130.5, 128.8, 128.6, 128.3, 126.1, 125.6 (q,  $J = 284.2$  Hz), 123.5 (q,  $J = 2.7$  Hz), 122.5, 115.0, 112.7, 112.1, 111.8, 102.9,

86.3, 86.0 (q,  $J = 1.9$  Hz), 55.7, 51.0 (q,  $J = 29.2$  Hz);  $^{19}\text{F}$  NMR (471 MHz,  $\text{CDCl}_3$ )  $\delta$  -70.6; HRMS (ESI)  $m/z$  calculated for  $\text{C}_{25}\text{H}_{17}\text{F}_3\text{NO}_2$   $[\text{M} - \text{H}]^-$  420.1217, found 420.1215; HPLC: the ee value was determined by HPLC analysis (Chiralpak AD-H, *i*-PrOH/hexane = 20/80, 1.0 mL/min, 215nm), retention time:  $t_{\text{minor}} = 8.703$  min,  $t_{\text{major}} = 10.577$  min, ee = 95.3%;  $[\alpha]_{\text{D}}^{30} = -112.5$  ( $c = 1.08$ ,  $\text{CHCl}_3$ ).

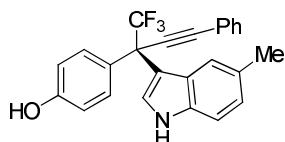

**(S)-4-(1,1,1-Trifluoro-2-(5-methyl-1H-indol-3-yl)-4-phenylbut-3-yn-2-yl)phenol (7b)**

It was purified by silica gel chromatography using EtOAc/petroleum ether (1:4). Yield: 85% (34.3 mg).  $^1\text{H}$  NMR (500 MHz,  $\text{CDCl}_3$ )  $\delta$  8.04 (brs, 1H), 7.54 (d,  $J = 8.6$  Hz, 2H), 7.51 – 7.47 (m, 2H), 7.35 – 7.29 (m, 4H), 7.25 (d,  $J = 8.3$  Hz, 1H), 7.19 (s, 1H), 7.01 (dd,  $J = 8.3, 1.3$  Hz, 1H), 6.76 (d,  $J = 8.8$  Hz, 2H), 2.32 (s, 3H);  $^{13}\text{C}$  NMR (126 MHz,  $\text{CDCl}_3$ )  $\delta$  155.6, 134.9, 132.0, 130.6, 129.2, 129.1, 128.8, 128.5, 125.9, 125.8 (q,  $J = 284.2$  Hz), 124.3, 123.3 (q,  $J = 2.6$  Hz), 122.7, 120.9, 115.2, 111.9, 111.0, 86.5– 86.4 (m), 51.3 (q,  $J = 29.2$  Hz), 21.8;  $^{19}\text{F}$  NMR (471 MHz,  $\text{CDCl}_3$ )  $\delta$  -70.5; HRMS (ESI)  $m/z$  calculated for  $\text{C}_{25}\text{H}_{17}\text{F}_3\text{NO}$   $[\text{M} - \text{H}]^-$  404.1268, found 404.1263; HPLC: the ee value was determined by HPLC analysis (Chiralpak AD-H, *i*-PrOH/hexane = 10/90, 1.0 mL/min, 239 nm), retention time:  $t_{\text{minor}} = 25.420$  min,  $t_{\text{major}} = 27.323$  min, ee = 90.3%;  $[\alpha]_{\text{D}}^{30} = -146.5$  ( $c = 1.03$ ,  $\text{CHCl}_3$ ).

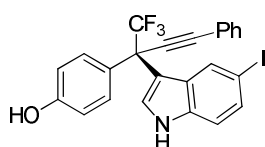

**(S)-4-(1,1,1-Trifluoro-2-(5-iodo-1H-indol-3-yl)-4-phenylbut-3-yn-2-yl)phenol (7c)**

It was purified by silica gel chromatography using EtOAc/petroleum ether (1:4). Yield: 82% (42.2 mg).  $^1\text{H}$  NMR (500 MHz,  $\text{CDCl}_3$ )  $\delta$  8.20 (brs, 1H), 7.83 – 7.79 (m, 1H), 7.54 – 7.48 (m, 4H), 7.44 – 7.41 (m, 1H), 7.36 – 7.30 (m, 4H), 7.16 – 7.11 (m, 1H), 6.79 (d,  $J = 8.7$  Hz, 2H), 4.97 (brs, 1H);  $^{13}\text{C}$  NMR (126 MHz,  $\text{CDCl}_3$ )  $\delta$  155.7, 135.5, 131.9, 131.0, 130.4, 129.9, 128.8, 128.4, 128.0, 125.4 (q,  $J = 284.1$  Hz), 123.6 (q,  $J = 2.5$  Hz), 122.2, 115.2, 113.3, 111.8, 86.8, 85.7 (q,  $J = 1.7$  Hz), 83.6, 50.9 (q,  $J = 29.6$  Hz);  $^{19}\text{F}$  NMR (471 MHz,  $\text{CDCl}_3$ )  $\delta$  -70.7; HRMS (ESI)  $m/z$  calculated for  $\text{C}_{24}\text{H}_{14}\text{F}_3\text{INO}$   $[\text{M} - \text{H}]^-$  516.0078, found 516.0086; HPLC: the ee value was determined by HPLC analysis

(Chiralpak AD-H, *i*-PrOH/hexane = 20/80, 1.0 mL/min, 254 nm), retention time:  $t_{\text{major}} = 5.477$  min,  $t_{\text{minor}} = 8.657$  min, ee = 95.1%;  $[\alpha]_{\text{D}}^{30} = -122.2$  (c = 1.01, CHCl<sub>3</sub>).

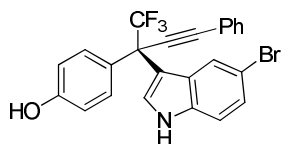

**(S)-4-(2-(5-Bromo-1H-indol-3-yl)-1,1,1-trifluoro-4-phenylbut-3-yn-2-yl)phenol (7d)**

It was purified by silica gel chromatography using EtOAc/petroleum ether (1:4). Yield: 80% (37.5 mg). <sup>1</sup>H NMR (500 MHz, CDCl<sub>3</sub>) δ 8.24 (brs, 1H), 7.55 (s, 1H), 7.53 – 7.46 (m, 4H), 7.41 – 7.39 (m, 1H), 7.35 – 7.30 (m, 3H), 7.26 – 7.25 (m, 2H), 6.79 (d, *J* = 8.8 Hz, 2H); <sup>13</sup>C NMR (126 MHz, CDCl<sub>3</sub>) δ 155.7, 135.1, 131.9, 130.4, 128.8, 128.4, 128.4, 127.3, 125.5, 125.4 (q, *J* = 284.2 Hz), 124.0 (q, *J* = 2.8 Hz), 123.6, 122.2, 115.2, 113.3, 112.7, 112.2, 86.7, 85.6 (q, *J* = 1.9 Hz), 50.9 (q, *J* = 29.5 Hz); <sup>19</sup>F NMR (471 MHz, CDCl<sub>3</sub>) δ -70.7; HRMS (ESI) *m/z* calculated for C<sub>24</sub>H<sub>14</sub>BrF<sub>3</sub>NO [M - H]<sup>-</sup> 468.0216, found 468.0220; HPLC: the ee value was determined by HPLC analysis (Chiralpak AD-H, *i*-PrOH/hexane = 20/80, 1.0 mL/min, 236 nm), retention time:  $t_{\text{major}} = 5.623$  min,  $t_{\text{minor}} = 6.840$  min, ee = 95.4%;  $[\alpha]_{\text{D}}^{30} = -125.0$  (c = 1.04, CHCl<sub>3</sub>).

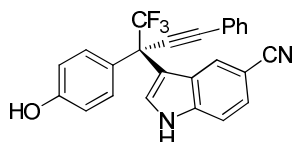

**(S)-3-(1,1,1-Trifluoro-2-(4-hydroxyphenyl)-4-phenylbut-3-yn-2-yl)-1H-indole-5-carbonitrile (7e)**

It was purified by silica gel chromatography using EtOAc/petroleum ether (1:4). Yield: 76% (31.8 mg). <sup>1</sup>H NMR (600 MHz, CD<sub>3</sub>OD) δ 7.60 – 7.56 (m, 2H), 7.56 – 7.53 (m, 1H), 7.47 – 7.41 (m, 4H), 7.39 – 7.33 (m, 4H), 6.79 (d, *J* = 8.9 Hz, 2H); <sup>13</sup>C NMR (151 MHz, CD<sub>3</sub>OD) δ 159.1, 140.1, 132.6, 131.2, 130.1, 129.7, 128.1, 127.1, 126.9 (q, *J* = 283.3 Hz), 126.7, 125.6, 123.3, 121.5, 116.1, 114.0, 113.9, 103.0, 87.8, 86.9 (q, *J* = 1.4 Hz), 52.2 (q, *J* = 29.4 Hz); <sup>19</sup>F NMR (471 MHz, CDCl<sub>3</sub>) δ -71.0; HRMS (ESI) *m/z* calculated for C<sub>25</sub>H<sub>14</sub>F<sub>3</sub>N<sub>2</sub>O [M - H]<sup>-</sup> 415.1064, found 415.1069; HPLC: the ee value was determined by HPLC analysis (Chiralpak AD-H, *i*-PrOH/hexane = 20/80, 1.0 mL/min, 247 nm), retention time:  $t_{\text{major}} = 4.800$  min,  $t_{\text{minor}} = 5.500$  min, ee = 92.8%;  $[\alpha]_{\text{D}}^{30} = -124.9$  (c = 1.01, THF).

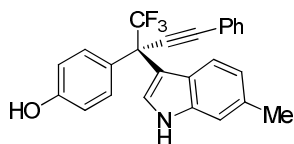

**(S)-4-(1,1,1-Trifluoro-2-(6-methyl-1H-indol-3-yl)-4-phenylbut-3-yn-2-yl)phenol (7f)**

It was purified by silica gel chromatography using EtOAc/petroleum ether (1:4). Yield: 81% (32.8 mg).  $^1\text{H}$  NMR (500 MHz,  $\text{CDCl}_3$ )  $\delta$  8.04 (brs, 1H), 7.53 (d,  $J = 8.6$  Hz, 2H), 7.49 – 7.46 (m, 2H), 7.34 – 7.28 (m, 4H), 7.21 (d,  $J = 8.2$  Hz, 1H), 7.16 (s, 1H), 6.82 (dd,  $J = 8.2, 0.8$  Hz, 1H), 6.76 (d,  $J = 8.8$  Hz, 2H), 4.84 (brs, 1H), 2.41 (s, 3H);  $^{13}\text{C}$  NMR (126 MHz,  $\text{CDCl}_3$ )  $\delta$  155.7, 137.1, 132.5, 132.1, 130.7, 129.2, 128.8, 128.4, 125.8 (q,  $J = 284.3$  Hz), 123.6, 122.7, 122.5 (q,  $J = 2.6$  Hz), 121.9, 120.9, 115.2, 112.5, 111.3, 86.4, 86.4, 51.2 (q,  $J = 29.2$  Hz), 21.8;  $^{19}\text{F}$  NMR (471 MHz,  $\text{CDCl}_3$ )  $\delta$  -70.6; HRMS (ESI)  $m/z$  calculated for  $\text{C}_{25}\text{H}_{17}\text{F}_3\text{NO}$  [ $\text{M} - \text{H}$ ] 404.1268, found 404.1259; HPLC: the ee value was determined by HPLC analysis (Chiralpak AD-H, *i*-PrOH/hexane = 20/80, 1.0 mL/min, 215 nm), retention time:  $t_{\text{minor}} = 8.347$  min,  $t_{\text{major}} = 11.900$  min, ee = 95.8%;  $[\alpha]_{\text{D}}^{30} = -113.3$  ( $c = 0.97$ ,  $\text{CHCl}_3$ ).

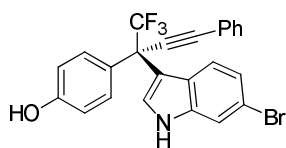

**(S)-4-(2-(6-Bromo-1H-indol-3-yl)-1,1,1-trifluoro-4-phenylbut-3-yn-2-yl)phenol (7g)**

It was purified by silica gel chromatography using EtOAc/petroleum ether (1:4). Yield: 78% (36.7 mg).  $^1\text{H}$  NMR (600 MHz,  $\text{CD}_3\text{OD}$ )  $\delta$  7.55 (d,  $J = 1.5$  Hz, 1H), 7.44 – 7.38 (m, 5H), 7.36 – 7.31 (m, 3H), 7.11 (d,  $J = 8.6$  Hz, 1H), 6.98 (dd,  $J = 8.6, 1.8$  Hz, 1H), 6.75 (d,  $J = 8.9$  Hz, 2H);  $^{13}\text{C}$  NMR (151 MHz,  $\text{CD}_3\text{OD}$ )  $\delta$  158.8, 139.1, 132.7, 131.3, 129.9, 129.6, 128.5, 127.1 (q,  $J = 283.1$  Hz), 125.8, 125.2 (q,  $J = 2.2$  Hz), 123.6, 123.2, 123.0, 116.3, 115.8, 115.4, 113.0, 87.3, 87.3, 52.2 (q,  $J = 29.2$  Hz);  $^{19}\text{F}$  NMR (471 MHz,  $\text{CDCl}_3$ )  $\delta$  -67.1; HRMS (ESI)  $m/z$  calculated for  $\text{C}_{24}\text{H}_{14}\text{BrF}_3\text{NO}$  [ $\text{M} - \text{H}$ ] 468.0216, found 468.0214; HPLC: the ee value was determined by HPLC analysis (Chiralpak AD-H, *i*-PrOH/hexane = 20/80, 1.0 mL/min, 215 nm), retention time:  $t_{\text{minor}} = 6.293$  min,  $t_{\text{major}} = 8.167$  min, ee = 95.0%;  $[\alpha]_{\text{D}}^{30} = -136.9$  ( $c = 1.01$ , THF).

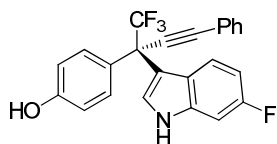

**(S)-4-(1,1,1-Trifluoro-2-(6-fluoro-1H-indol-3-yl)-4-phenylbut-3-yn-2-yl)phenol (7h)**

It was purified by silica gel chromatography using EtOAc/petroleum ether (1:4). Yield: 75% (30.7 mg).  $^1\text{H}$  NMR (500 MHz,  $\text{CDCl}_3$ )  $\delta$  8.18 (brs, 1H), 7.53 – 7.49 (m, 2H), 7.48 – 7.45 (m, 2H), 7.39 – 7.37 (m, 1H), 7.34 – 7.28 (m, 3H), 7.25 – 7.22 (m, 1H), 7.07 – 7.04 (m, 1H), 6.80 – 6.72 (m, 3H);  $^{13}\text{C}$  NMR (126 MHz,  $\text{CDCl}_3$ )  $\delta$  160.3 (d,  $J = 238.9$  Hz), 155.9, 136.6 (d,  $J = 12.3$  Hz), 132.1, 130.7, 128.9, 128.9, 128.5, 125.7 (q,  $J = 284.7$  Hz), 123.4 (q,  $J = 2.5$  Hz), 122.5, 122.3, 122.1 (d,  $J = 10.1$  Hz), 115.2, 112.9, 109.1 (d,  $J = 24.4$  Hz), 97.7 (d,  $J = 26.2$  Hz), 86.7, 86.1 (q,  $J = 1.7$  Hz), 51.2 (q,  $J = 29.7$  Hz);  $^{19}\text{F}$  NMR (471 MHz,  $\text{CDCl}_3$ )  $\delta$  -70.8, -120.5; HRMS (ESI)  $m/z$  calculated for  $\text{C}_{24}\text{H}_{14}\text{F}_4\text{NO}$  [ $\text{M} - \text{H}$ ] $^-$  408.1017, found 408.1007; HPLC: the ee value was determined by HPLC analysis (Chiralpak IB, *i*-PrOH/hexane = 10/90, 1.0 mL/min, 218 nm), retention time:  $t_{\text{minor}} = 12.190$  min,  $t_{\text{major}} = 13.153$  min, ee = 93.1%;  $[\alpha]_{\text{D}}^{30} = -168.1$  ( $c = 1.05$ ,  $\text{CHCl}_3$ ).

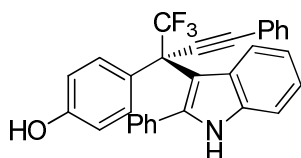

**(S)-4-(1,1,1-Trifluoro-4-phenyl-2-(2-phenyl-1H-indol-3-yl)but-3-yn-2-yl)phenol (7i)**

It was purified by silica gel chromatography using EtOAc/petroleum ether (1:4). Yield: 70% (32.6 mg).  $^1\text{H}$  NMR (500 MHz,  $\text{CDCl}_3$ )  $\delta$  8.07 (brs, 1H), 7.54 (d,  $J = 8.3$  Hz, 1H), 7.43 (d,  $J = 8.5$  Hz, 2H), 7.36 – 7.31 (m, 3H), 7.28 – 7.17 (m, 7H), 7.13 – 7.10 (m, 2H), 7.07 – 7.03 (m, 1H), 6.64 (d,  $J = 8.8$  Hz, 2H), 5.03 (brs, 1H);  $^{13}\text{C}$  NMR (126 MHz,  $\text{CDCl}_3$ )  $\delta$  154.9, 138.7, 135.1, 133.9, 131.9, 131.6, 130.6, 130.0, 128.5, 128.3, 128.0, 127.7, 127.1, 126.2 (q,  $J = 284.5$  Hz), 122.6, 122.4, 122.3 (q,  $J = 2.2$  Hz), 120.3, 115.1, 110.8, 109.2, 87.8 (q,  $J = 2.3$  Hz), 87.6, 51.6 (q,  $J = 29.4$  Hz);  $^{19}\text{F}$  NMR (471 MHz,  $\text{CDCl}_3$ )  $\delta$  -67.0; HRMS (ESI)  $m/z$  calculated for  $\text{C}_{30}\text{H}_{19}\text{F}_3\text{NO}$  [ $\text{M} - \text{H}$ ] $^-$  466.1424, found 466.1431; HPLC: the ee value was determined by HPLC analysis (Chiralpak AD-H, *i*-PrOH/hexane = 20/80, 1.0 mL/min, 237 nm), retention time:  $t_{\text{major}} = 6.660$  min,  $t_{\text{minor}} = 7.757$  min, ee = 92.3%;  $[\alpha]_{\text{D}}^{30} = -16.2$  ( $c = 1.04$ ,  $\text{CHCl}_3$ ).

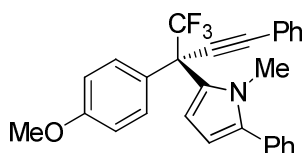

**1-Methyl-2-phenyl-5-(1,1,1-trifluoro-2-(4-methoxyphenyl)-4-phenylbut-3-yn-2-yl)-1H-pyrrole (9')**

**9** was prepared using **3d** with 1.0 equiv of **8** without  $K_2CO_3$  additive. The mixture was treated with NaH and MeI for purification due to the product instability issue. Yield: 65% (29.0 mg).  $^1H$  NMR (500 MHz,  $CDCl_3$ )  $\delta$  7.58 – 7.54 (m, 2H), 7.51 (d,  $J = 8.6$  Hz, 2H), 7.41 – 7.34 (m, 7H), 7.33 – 7.29 (m, 1H), 6.93 (d,  $J = 8.9$  Hz, 2H), 6.56 – 6.53 (m, 1H), 6.28 (d,  $J = 3.8$  Hz, 1H), 3.84 (s, 3H), 3.28 (s, 3H);  $^{13}C$  NMR (126 MHz,  $CDCl_3$ )  $\delta$  160.1, 136.9, 133.4, 132.1, 130.4, 129.5, 129.1, 128.6, 128.5, 127.9, 127.3, 127.2, 125.1 (q,  $J = 284.1$  Hz), 122.3, 114.0, 109.0 (q,  $J = 2.9$  Hz), 107.8, 87.3, 84.7, 55.5, 52.4 (q,  $J = 28.9$  Hz), 33.7;  $^{19}F$  NMR (471 MHz,  $CDCl_3$ )  $\delta$  -70.4; HRMS (ESI)  $m/z$  calculated for  $C_{28}H_{23}F_3NO$   $[M + H]^+$  446.1726, found 446.1739; HPLC: the ee value was determined by HPLC analysis (Chiralcel OD-H, *i*-PrOH/hexane = 0.5/99.5, 1.0 mL/min, 279 nm), retention time:  $t_{minor} = 7.360$  min,  $t_{major} = 8.460$  min, ee = 93.1%;  $[\alpha]_D^{30} = -13.3$  (c = 0.92,  $CHCl_3$ ).

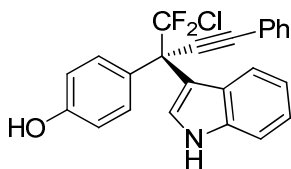

**(S)-4-(1-Chloro-1,1-difluoro-2-(1H-indol-3-yl)-4-phenylbut-3-yn-2-yl)phenol (11a)**

It was purified by silica gel chromatography using EtOAc/petroleum ether (1:4). Yield: 63% (25.8mg).  $^1H$  NMR (500 MHz,  $CDCl_3$ )  $\delta$  8.16 (brs, 1H), 7.56 (d,  $J = 8.6$  Hz, 2H), 7.51 – 7.44 (m, 3H), 7.41 – 7.28 (m, 5H), 7.20 – 7.14 (m, 1H), 7.02 – 6.96 (m, 1H), 6.75 (d,  $J = 8.8$  Hz, 2H), 4.95 (brs, 1H);  $^{13}C$  NMR (126 MHz,  $CDCl_3$ )  $\delta$  155.7, 136.4, 132.0, 131.2, 130.9 (t,  $J = 300.6$  Hz), 129.7, 128.8, 128.5, 126.0, 123.4 (t,  $J = 3.3$  Hz), 122.7, 122.6, 121.4, 120.0, 115.0, 113.2, 111.3, 87.4 (t,  $J = 3.1$  Hz), 87.2, 56.7 (t,  $J = 25.4$  Hz);  $^{19}F$  NMR (471 MHz,  $CDCl_3$ )  $\delta$  -54.50 – -56.79 (m, 2F); HRMS (ESI)  $m/z$  calculated for  $C_{24}H_{15}ClF_2NO$   $[M - H]^-$  406.0816, found 406.0809; HPLC: the ee value was determined by HPLC analysis (Chiralpak IG, *i*-PrOH/hexane = 10/90, 1.0 mL/min, 254 nm), retention time:  $t_{minor} = 6.623$  min,  $t_{major} = 15.933$  min, ee = 84.1%;  $[\alpha]_D^{30} = -21.5$  (c = 1.04,  $CHCl_3$ ).

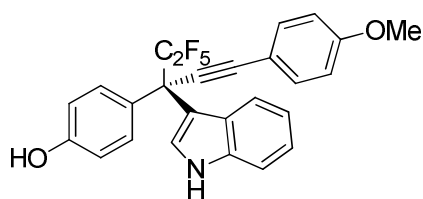

**(S)-4-(4,4,5,5,5-Pentafluoro-3-(1*H*-indol-3-yl)-1-phenylpent-1-yn-3-yl)phenol (11b)**

It was purified by silica gel chromatography using EtOAc/petroleum ether (1:4). Yield: 68% (32.1mg).  $^1\text{H}$  NMR (500 MHz,  $\text{CDCl}_3$ )  $\delta$  8.13 (brs, 1H), 7.59 (d,  $J = 7.6$  Hz, 2H), 7.45 – 7.31 (m, 5H), 7.18 – 7.12 (m, 1H), 7.00 – 6.94 (m, 1H), 6.83 (d,  $J = 8.9$  Hz, 2H), 6.75 (d,  $J = 8.9$  Hz, 2H), 5.12 (brs, 1H), 3.80 (s, 3H);  $^{13}\text{C}$  NMR (126 MHz,  $\text{CDCl}_3$ )  $\delta$  160.1, 155.7, 136.5, 133.4, 130.8, 128.7, 125.9, 123.2 (t,  $J = 4.6$  Hz), 122.5, 121.5, 119.9, 124.1 – 112.7 (m), 115.1, 114.8, 114.1, 113.1, 111.3, 88.1, 84.4 – 84.2 (m), 55.5, 50.2 – 49.7 (m);  $^{19}\text{F}$  NMR (471 MHz,  $\text{CDCl}_3$ )  $\delta$  -76.5 – -76.6 (m, 3F), -110.0 – -115.7 (m, 2F); HRMS (ESI)  $m/z$  calculated for  $\text{C}_{26}\text{H}_{17}\text{F}_5\text{NO}_2$  [ $\text{M} - \text{H}$ ] $^-$  470.1185, found 470.1188; HPLC: the ee value was determined by HPLC analysis (Chiralpak IG, *i*-PrOH/hexane = 10/90, 1.0 mL/min, 256 nm), retention time:  $t_{\text{minor}} = 7.460$  min,  $t_{\text{major}} = 13.857$  min, ee = 91.1%;  $[\alpha]_{\text{D}}^{30} = -88.3$  ( $c = 1.04$ ,  $\text{CHCl}_3$ ).

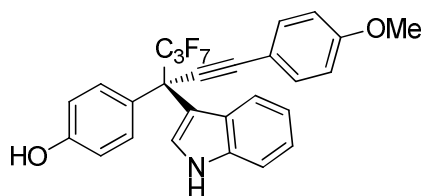

**(S)-4-(4,4,5,5,6,6,6-Heptafluoro-3-(1*H*-indol-3-yl)-1-(4-methoxyphenyl)hex-1-yn-3-yl)phenol (11c)**

It was purified by silica gel chromatography using EtOAc/petroleum ether (1:4). Yield: 66% (34.3 mg).  $^1\text{H}$  NMR (500 MHz,  $\text{CDCl}_3$ )  $\delta$  8.07 (brs, 1H), 7.62 (d,  $J = 8.4$  Hz, 2H), 7.49 (d,  $J = 8.1$  Hz, 1H), 7.40 (d,  $J = 8.7$  Hz, 2H), 7.33 (s, 1H), 7.30 (d,  $J = 8.2$  Hz, 1H), 7.18 – 7.14 (m, 1H), 7.03 – 6.98 (m, 1H), 6.84 (d,  $J = 8.7$  Hz, 2H), 6.74 (d,  $J = 8.8$  Hz, 2H), 5.21 (brs, 1H), 3.80 (s, 3H);  $^{13}\text{C}$  NMR (126 MHz,  $\text{CDCl}_3$ )  $\delta$  160.0, 155.6, 136.5, 133.4, 131.0, 128.5, 125.8, 123.3, 122.5, 121.5, 119.9, 122.9 – 107.5 (m), 115.1, 114.8, 114.2, 113.1, 111.4, 88.2, 84.3 – 84.2 (m), 55.5, 50.9 (t,  $J = 23.7$  Hz);  $^{19}\text{F}$  NMR (471 MHz,  $\text{CDCl}_3$ )  $\delta$  -80.9 – -81.0 (m, 3F), -106.2 – -109.8 (m, 2F), -117.8 – -121.3 (m, 2F); HRMS (ESI)  $m/z$  calculated for  $\text{C}_{27}\text{H}_{17}\text{F}_7\text{NO}_2$  [ $\text{M} - \text{H}$ ] $^-$  520.1153 found 520.1149; HPLC: the ee

value was determined by HPLC analysis (Chiralpak IG, *i*-PrOH/hexane = 10/90, 1.0 mL/min, 253 nm), retention time:  $t_{\text{minor}} = 5.647$  min,  $t_{\text{major}} = 8.487$  min, ee = 93.0%;  $[\alpha]_{\text{D}}^{30} = -56.6$  (c = 1.01, CHCl<sub>3</sub>).



## Absolute configuration determination

### Absolute configuration determination of 4a

The absolute configuration of **4a** was determined by preparing the same product **B** from the reported optical pure substrate (*S*)-**A** and **4a** respectively.<sup>[5-6]</sup>

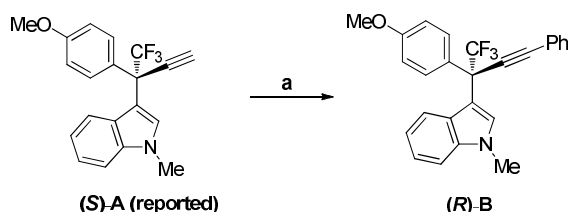

**Reagent and condition:** (a) iodobenzene (1.1 equiv), PdCl<sub>2</sub>(PPh<sub>3</sub>)<sub>2</sub> (0.02 equiv), CuI (0.015ml, 0.05 equiv), THF/Et<sub>3</sub>N (1 mL/ 1 mL), N<sub>2</sub>, 60 °C, 12 h.

### (*R*)-1-Methyl-3-(1,1,1-trifluoro-2-(4-methoxyphenyl)-4-phenylbut-3-yn-2-yl)-1*H*-indole (**B**)

Prepared starting from (*S*)-**A** according to procedure a. <sup>1</sup>H NMR (500 MHz, CDCl<sub>3</sub>) δ 7.59 (d, *J* = 8.8 Hz, 2H), 7.50 – 7.45 (m, 2H), 7.35 – 7.27 (m, 5H), 7.26 – 7.24 (m, 1H), 7.22 – 7.18 (m, 1H), 6.99 – 6.95 (m, 1H), 6.85 (d, *J* = 8.9 Hz, 2H), 3.84 (s, 3H), 3.79 (s, 3H); <sup>13</sup>C NMR (126 MHz, CDCl<sub>3</sub>) δ 159.7, 137.5, 132.1, 130.4, 129.0, 128.7, 128.4, 127.7 (q, *J* = 2.6 Hz), 126.3, 125.9 (q, *J* = 284.4 Hz), 122.8, 122.1, 121.4, 119.6, 113.6, 110.9, 109.5, 86.5 (q, *J* = 1.2 Hz), 86.4, 55.4, 51.2 (q, *J* = 29.1 Hz), 33.2; <sup>19</sup>F NMR (471 MHz, CDCl<sub>3</sub>) δ -70.6; HRMS (ESI) *m/z* calculated for C<sub>26</sub>H<sub>21</sub>F<sub>3</sub>NO [M+H]<sup>+</sup> 420.1570, found 420.1566; HPLC: the ee value was determined by HPLC analysis (Chiralpak AD-H, i-PrOH/hexane = 2/98, 1.0 mL/min, 215nm), retention time: *t*<sub>major</sub> = 6.753 min, *t*<sub>minor</sub> = 10.740 min, ee = 88.8%; [α]<sub>D</sub><sup>30</sup> = +98.3 (c = 0.50, CHCl<sub>3</sub>).

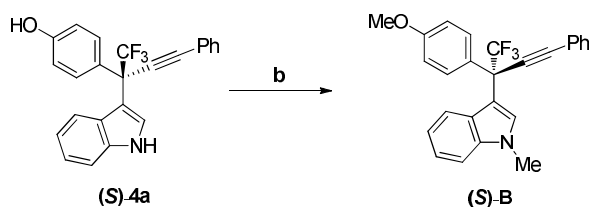

**Reagent and condition:** (b) MeI (5.0 equiv), NaH (2.5 equiv), THF.

Prepared starting from **4a** according to procedure **b**.  $^1\text{H}$  NMR,  $^{13}\text{C}$  NMR and  $^{19}\text{F}$  NMR were the same as the (*R*)-**B** above. HPLC: the ee value was determined by HPLC analysis (Chiralpak AD-H, *i*-PrOH/hexane = 2/98, 1.0 mL/min, 215 nm), retention time:  $t_{\text{minor}} = 6.353$  min,  $t_{\text{major}} = 9.693$  min, ee = 94.4%;  $[\alpha]_{\text{D}}^{30} = -120.2$  ( $c = 0.22$ ,  $\text{CHCl}_3$ ). The results of HPLC and  $[\alpha]_{\text{D}}$  were opposite to (*R*)-**B**, which allowed the assignment of the absolute configuration of **4a** as *S* according to the known literature.

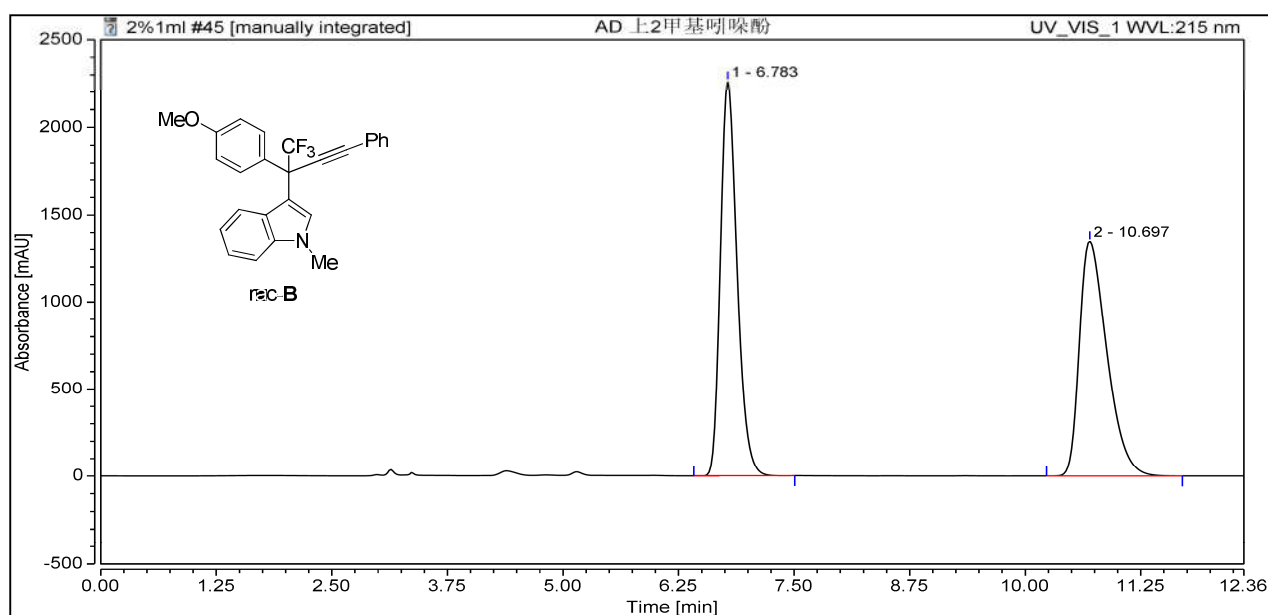

| Integration Results |           |                       |                 |                    |                |
|---------------------|-----------|-----------------------|-----------------|--------------------|----------------|
| No.                 | Peak Name | Retention Time<br>min | Area<br>mAU*min | Relative Area<br>% | Amount<br>n.a. |
| 1                   |           | 6.783                 | 472.765         | 50.48              | n.a.           |
| 2                   |           | 10.697                | 463.867         | 49.52              | n.a.           |
| <b>Total:</b>       |           |                       | <b>936.632</b>  | <b>100.00</b>      |                |

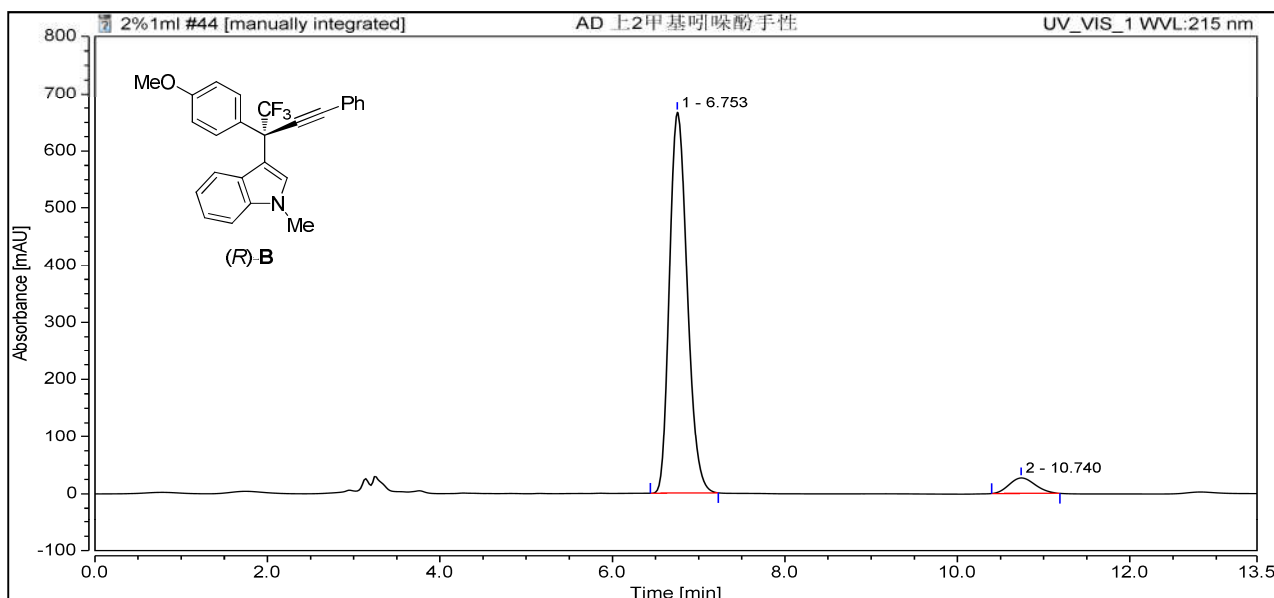

### Integration Results

| No.           | Peak Name | Retention Time<br>min | Area<br>mAU*min | Relative Area<br>% | Amount<br>n.a. |
|---------------|-----------|-----------------------|-----------------|--------------------|----------------|
| 1             |           | 6.753                 | 158.969         | 94.41              | n.a.           |
| 2             |           | 10.740                | 9.409           | 5.59               | n.a.           |
| <b>Total:</b> |           |                       | <b>168.378</b>  | <b>100.00</b>      |                |

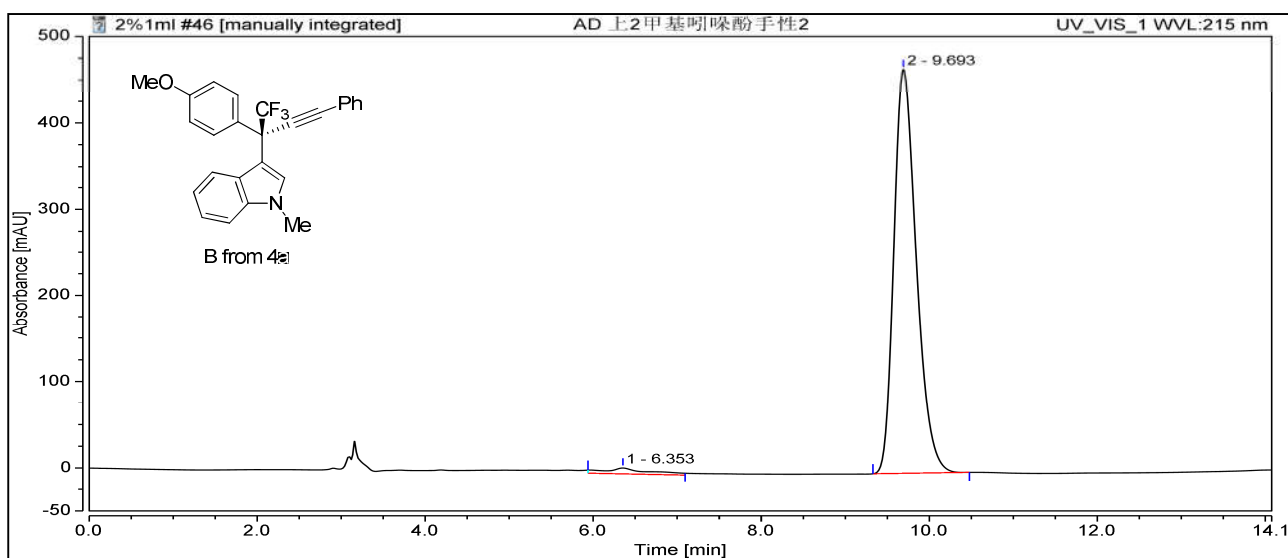

### Integration Results

| No.           | Peak Name | Retention Time<br>min | Area<br>mAU*min | Relative Area<br>% | Amount<br>n.a. |
|---------------|-----------|-----------------------|-----------------|--------------------|----------------|
| 1             |           | 6.353                 | 4.201           | 2.82               | n.a.           |
| 2             |           | 9.693                 | 144.613         | 97.18              | n.a.           |
| <b>Total:</b> |           |                       | <b>148.814</b>  | <b>100.00</b>      |                |

### Absolute configuration determination of **6a**

The absolute configuration of **6a** was determined to be *S* on the basis of UV and circular dichroism (CD) analyses. The simulated electrostatic circular dichroism (ECD) curve of (*S*)-**6a** and (*R*)-**6a** through DFT calculation were correspondingly expressed as the red curve **6a<sub>S</sub>** and the blue curve **6a<sub>R</sub>**. The experiment ECD curve of **6a** through handling the experimental data from UV and CD spectra was expressed as the black curve **6a**. According to the figure shown below, the trend of the experiment ECD curve of **6a** was consistent with the simulated ECD curve of **6a<sub>S</sub>**, which allowed the assignment of the absolute configuration of **6a** as *S*.

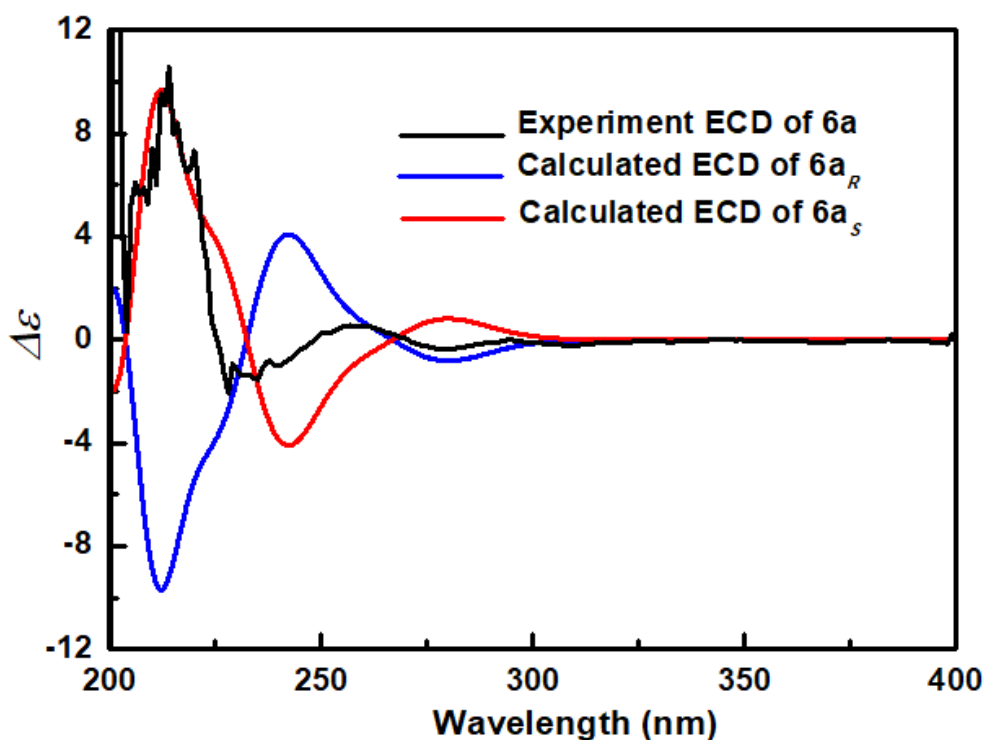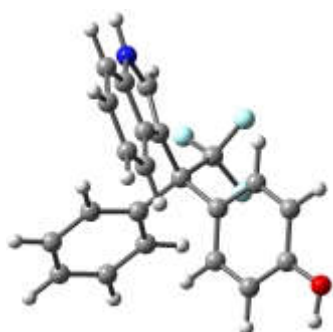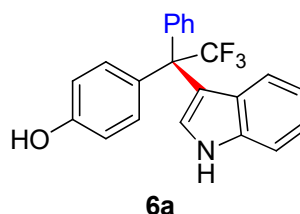

(*S*)-4-(2,2,2-trifluoro-1-(1*H*-indol-3-yl)-1-phenylethyl)phenol

### Computational methods:

The calculations were conducted using density functional theory (DFT) as implemented in the gaussian 09.<sup>[7]</sup> Geometry optimization and frequency calculation were carried out at the B3LYP/6-31G\* level. Electronic excitation energies and rotational strengths in methanol were calculated using TDDFT at cam-B3LYP/PCM-6-31+G(d,p) level in velocity formalism for the first 50 states. The CD curves were simulated by using the Gaussian function:<sup>[8]</sup>

$$\Delta\epsilon(E) = \frac{1}{2.296 \times 10^{-39}} \frac{1}{\sigma\sqrt{\pi}} \times \sum_i \Delta E_i R_i e^{-[(E-\Delta E_i)/\sigma]^2}$$

where  $\sigma$  is the width of the band at  $1/e$  height and  $\Delta E_i$  and  $R_i$  are the excitation energies and rotatory strengths for transition  $i$ , respectively. Here a value of  $\sigma = 0.6$  eV.

## Synthetic application

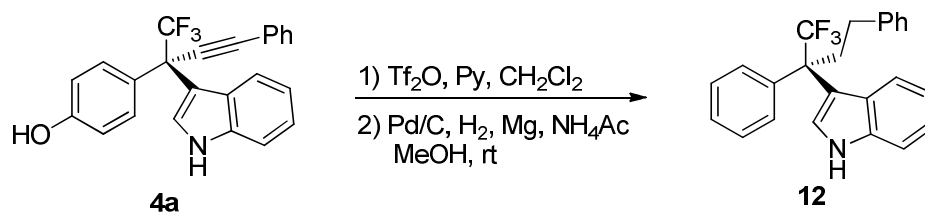

### (*R*)-3-(1,1,1-Trifluoro-2,4-diphenylbutan-2-yl)-1*H*-indole (**12**)

To a solution of **4a** (0.1 mmol, 1.0 equiv) in CH<sub>2</sub>Cl<sub>2</sub> (5 mL) were added pyridine (0.2 mmol, 2.0 equiv) and a solution of Tf<sub>2</sub>O (0.115 mmol, 1.15 equiv) in CH<sub>2</sub>Cl<sub>2</sub> (0.5 mL) sequentially. The reaction mixture was stirred for 2 h. Then water (10 mL) was added. The layers were separated, and the aqueous layer was extracted with ethyl acetate (10 mL×3). The combined organic layers were washed with brine (10 mL), dried over anhydrous Na<sub>2</sub>SO<sub>4</sub>, filtered, and concentrated. The residue was purified by flash chromatography on silica gel using EtOAc/petroleum ether (1:10) as eluent. Then a mixture of the product, 10% Pd/C (9.3 mg, 10 wt %), NH<sub>4</sub>OAc (15.4 mg), and Mg (12.0 mg) in methanol (5.0 mL) was stirred at room temperature under hydrogen balloon for 12 h. The mixture was passed through a short length of silica gel using EtOAc/petroleum ether (1:10) as eluent to afford **12** (32.6 mg, 86% yield). <sup>1</sup>H NMR (500 MHz, CDCl<sub>3</sub>) δ 8.15 (brs, 1H), 7.44 – 7.41 (m, 2H), 7.39 – 7.35 (m, 2H), 7.30 – 7.26 (m, 3H), 7.24 – 7.20 (m, 2H), 7.17 – 7.13 (m, 2H), 7.03 – 7.01 (m, 2H), 6.91 – 6.87 (m, 1H), 6.81 – 6.78 (m, 1H), 2.88 – 2.76 (m, 2H), 2.64 – 2.55 (m, 1H), 2.38 – 2.29 (m, 1H); <sup>13</sup>C NMR (126 MHz, CDCl<sub>3</sub>) δ 142.4, 139.1, 136.6, 129.3, 128.6, 128.6, 128.3 (q, *J* = 285.1 Hz), 128.2, 127.8, 126.1, 124.3 (q, *J* = 2.2 Hz), 122.4, 121.6, 119.9, 114.0, 111.4, 53.8 (q, *J* = 24.5 Hz), 38.3, 31.8; <sup>19</sup>F NMR (471 MHz, CDCl<sub>3</sub>) δ -68.1; HRMS (EI) *m/z* calculated for C<sub>24</sub>H<sub>21</sub>F<sub>3</sub>N [M + H]<sup>+</sup>: 380.1621, found 380.1623; HPLC: the ee value was determined by HPLC analysis (Chiralpak IG, i-PrOH/hexane = 5/95, 1 mL/min, 215 nm), retention time: *t*<sub>major</sub> = 9.737 min, *t*<sub>minor</sub> = 11.590 min, ee = 93.4%; [α]<sub>D</sub><sup>30</sup> = +8.5 (c = 0.96, CHCl<sub>3</sub>).

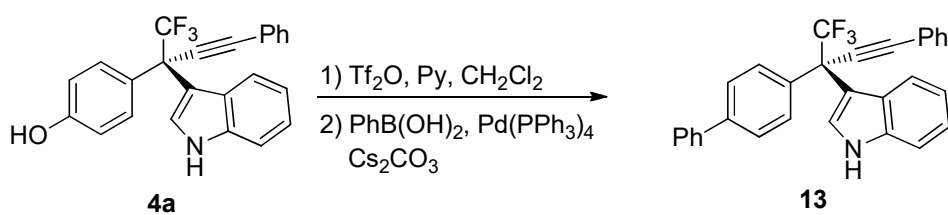

**(S)-3-(2-([1,1'-Biphenyl]-4-yl)-1,1,1-trifluoro-4-phenylbut-3-yn-2-yl)-1H-indole (13)**

To a solution of **4a** (0.1 mmol, 1.0 equiv) in  $\text{CH}_2\text{Cl}_2$  (5 mL) were added pyridine (0.2 mmol, 2.0 equiv) and a solution of  $\text{Tf}_2\text{O}$  (0.115 mmol, 1.15 equiv) in  $\text{CH}_2\text{Cl}_2$  (0.5 mL) sequentially. The reaction mixture was stirred for 2 h. Then water (10 mL) was added. The layers were separated, and the aqueous layer was extracted with ethyl acetate (10 mL $\times$ 3). The combined organic layers were washed with brine (10 mL), dried over anhydrous  $\text{Na}_2\text{SO}_4$ , filtered, and concentrated. The residue was purified by flash chromatography on silica gel using EtOAc/petroleum ether (1:10) as eluent. Then to a solution of the product, phenylboronic acid (0.15 mmol, 1.5 equiv),  $\text{Cs}_2\text{CO}_3$  (97.7 mg, 0.3 mmol, 3 equiv) in dioxane (1 mL) was added  $\text{Pd(PPh}_3)_4$  (17.3 mg, 0.015 mmol, 0.15 equiv) and degassed with nitrogen. The reaction mixture was stirred at 60 °C for 48 h and then filtered through a short pad of celite, which was washed with  $\text{CH}_2\text{Cl}_2$  (10 mL). The filtrate was concentrated and the residue was purified by flash chromatography on silica gel using EtOAc/petroleum ether (1:50) as eluent to afford **13** (38.9 mg, 86% yield).  $^1\text{H}$  NMR (500 MHz,  $\text{CD}_3\text{OD}$ )  $\delta$  7.71 (d,  $J$  = 8.3 Hz, 2H), 7.61 – 7.56 (m, 4H), 7.47 – 7.44 (m, 3H), 7.41 – 7.37 (m, 3H), 7.35 – 7.28 (m, 4H), 7.26 (d,  $J$  = 8.1 Hz, 1H), 7.10 – 7.06 (m, 1H), 6.88 – 6.84 (m, 1H);  $^{13}\text{C}$  NMR (126 MHz,  $\text{CD}_3\text{OD}$ )  $\delta$  142.5, 141.6, 138.3, 137.3, 132.7, 130.6, 129.9, 129.9, 129.6, 128.6, 128.1, 127.7, 127.1 (q,  $J$  = 283.3 Hz), 126.7, 124.5 (q,  $J$  = 2.3 Hz), 123.6, 122.9, 121.5, 120.1, 112.5, 112.0, 87.5, 87.2 (q,  $J$  = 1.8 Hz), 52.9 (q,  $J$  = 28.9 Hz);  $^{19}\text{F}$  NMR (471 MHz,  $\text{CD}_3\text{OD}$ )  $\delta$  -71.4; HRMS (EI)  $m/z$  calculated for  $\text{C}_{30}\text{H}_{19}\text{F}_3\text{N}$  [ $\text{M} - \text{H}$ ] $^-$ : 450.1475, found 450.1483; HPLC: the ee value was determined by HPLC analysis (Chiralpak IG, *i*-PrOH/hexane = 5/95, 1 mL/min, 215 nm), retention time:  $t_{\text{minor}}$  = 8.923 min,  $t_{\text{major}}$  = 10.400 min, ee = 93.2%;  $[\alpha]_{\text{D}}^{30}$  = -54.6 ( $c$  = 0.99,  $\text{CHCl}_3$ ).

## Mechanistic studies

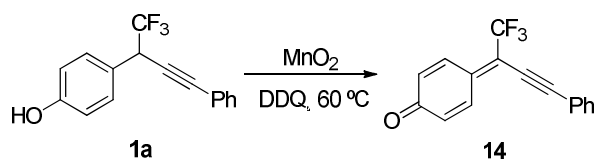

### 4-(1,1,1-Trifluoro-4-phenylbut-3-yn-2-ylidene)cyclohexa-2,5-dienone (**14**)

A solution of **1a** (0.1 mmol, 1.0 equiv),  $\text{MnO}_2$  (0.5 mmol, 5.0 equiv) and DDQ (0.025 mmol, 0.25 equiv) in  $\text{CH}_2\text{Cl}_2$  (1.0 mL) was stirred at 60 °C for 8 h. Then it was purified directly by silica gel chromatography using ethyl acetate/petroleum ether 1:9). Yield: 11% (2.9 mg).  $^1\text{H}$  NMR (500 MHz,  $\text{C}_6\text{D}_6$ )  $\delta$  7.37 (dd,  $J = 10.0, 2.6$  Hz, 1H), 7.24 – 7.20 (m, 2H), 7.20 – 7.17 (m, 1H), 7.00 – 6.93 (m, 1H), 6.93 – 6.87 (m,  $J = 7.6$  Hz, 2H), 6.23 (dd,  $J = 10.0, 1.6$  Hz, 1H), 6.08 (dd,  $J = 10.2, 1.9$  Hz, 1H);  $^{13}\text{C}$  NMR (126 MHz,  $\text{C}_6\text{D}_6$ )  $\delta$  185.6, 139.1, 136.1, 132.2, 131.9 (q,  $J = 2.7$  Hz), 131.5, 130.6, 130.5, 128.9, 121.9 (q,  $J = 275.7$  Hz), 121.5, 121.4 (q,  $J = 34.1$  Hz), 110.1, 84.4 (q,  $J = 3.7$  Hz);  $^{19}\text{F}$  NMR (471 MHz,  $\text{C}_6\text{D}_6$ )  $\delta$  -55.8; HRMS (ESI)  $m/z$  calculated for  $\text{C}_{16}\text{H}_{10}\text{F}_3\text{O}$   $[\text{M} + \text{H}]^+$  275.0678, found 275.0673.

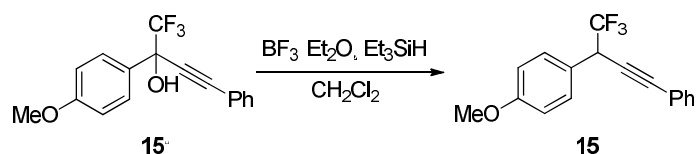

### 1-Methoxy-4-(1,1,1-trifluoro-4-phenylbut-3-yn-2-yl)benzene (**15**)

To a solution of **15'** (0.5 mmol, 1.0 equiv) was added  $\text{Et}_3\text{SiH}$  (1.0 mmol, 2.0 equiv) and  $\text{BF}_3 \cdot \text{Et}_2\text{O}$  (0.75 mmol, 1.5 equiv) in  $\text{CH}_2\text{Cl}_2$  (5.0 mL) at -40 °C. Then it was warmed to room temperature. Upon starting material consumption monitored by TLC, the mixture was quenched by a saturated aqueous  $\text{NaHCO}_3$  solution. The organic layer was extracted with  $\text{CH}_2\text{Cl}_2$  and the combined organic layers were washed with saturated aqueous  $\text{NaCl}$  solution, dried over anhydrous  $\text{MgSO}_4$ , filtered and removed under vacuum. The residue was purified by a column chromatography on silica gel using petroleum ether as eluent to give the desired product **15** (68% yield).  $^1\text{H}$  NMR (500 MHz,  $\text{CDCl}_3$ )  $\delta$  7.56 – 7.44 (m, 4H), 7.40 – 7.32 (m, 3H), 6.95 (d,  $J = 8.8$  Hz, 2H), 4.53 (q,  $J = 8.0$  Hz, 1H), 3.83 (s, 3H);  $^{13}\text{C}$  NMR (126 MHz,  $\text{CDCl}_3$ )  $\delta$  160.2, 132.1, 130.7, 129.0, 128.5, 124.6 (q,  $J = 280.4$  Hz), 124.1, 122.4, 114.3, 85.7, 82.1 (q,  $J = 3.3$  Hz), 55.5, 43.5 (q,  $J = 31.6$  Hz);  $^{19}\text{F}$  NMR (471 MHz,  $\text{CDCl}_3$ )  $\delta$  -70.8; HRMS (ESI)  $m/z$  calculated for  $\text{C}_{17}\text{H}_{14}\text{F}_3\text{O}$   $[\text{M} + \text{H}]^+$  291.0991, found 291.0987.



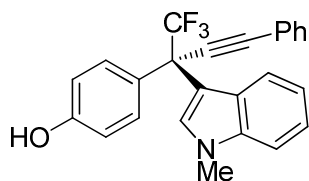

**(S)-4-(1,1,1-Trifluoro-2-(1-methyl-1H-indol-3-yl)-4-phenylbut-3-yn-2-yl)phenol (20)**

It was prepared according to the general procedure and purified by a column chromatography on silica gel using CH<sub>2</sub>Cl<sub>2</sub>. Yield: 60% (24.4 mg) <sup>1</sup>H NMR (500 MHz, CDCl<sub>3</sub>) δ 7.57 (d, *J* = 8.6 Hz, 2H), 7.53 – 7.47 (m, 2H), 7.38 (d, *J* = 8.1 Hz, 1H), 7.35 – 7.29 (m, 4H), 7.27 (m, 1H), 7.25 – 7.20 (m, 1H), 7.05 – 6.98 (m, 1H), 7.04 – 6.99 (m, 1H), 6.77 (d, *J* = 8.8 Hz, 2H), 3.82 (s, 3H); <sup>13</sup>C NMR (126 MHz, CDCl<sub>3</sub>) δ 155.7, 137.4, 132.1, 130.6, 129.2, 128.8, 128.4, 127.7 (q, *J* = 2.4 Hz), 126.2, 125.8 (q, *J* = 284.3 Hz), 122.7, 122.2, 121.3, 119.6, 115.1, 110.8, 109.5, 86.4, 51.2 (q, *J* = 29.5 Hz), 33.1; <sup>19</sup>F NMR (471 MHz, CDCl<sub>3</sub>) δ -70.5; HRMS (ESI) *m/z* calculated for C<sub>25</sub>H<sub>17</sub>F<sub>3</sub>NO [M - H]<sup>-</sup> 404.1268, found 404.1275; HPLC: the ee value was determined by HPLC analysis (Chiralpak AD-H, i-PrOH/hexane = 20/80, 1 mL/min, 243 nm), retention time: *t*<sub>minor</sub> = 4.707 min, *t*<sub>major</sub> = 6.463 min, ee = 5.1%.

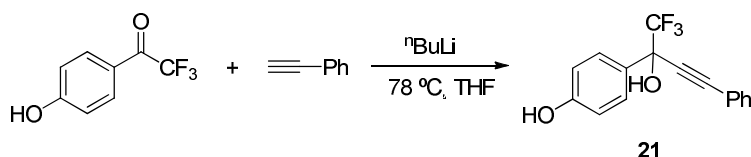

**4-(1,1,1-Trifluoro-2-hydroxy-4-phenylbut-3-yn-2-yl)phenol (21)**

To a solution of alkyne (2 mmol, 2.0 equiv) in anhydrous THF at -78 °C under N<sub>2</sub> was added <sup>n</sup>BuLi (2 mmol, 0.8 mL, 2.5 M in hexane, 2.0 equiv) dropwise. The reaction was stirred at the same temperature for 1 h. Then a solution of ketone (1 mmol, 1.0 equiv) in anhydrous THF (5 mL) was added to the mixture dropwise. The reaction was kept at -78°C for 15 min and then warmed up to room temperature slowly overnight. Upon completion, the mixture was quenched by a saturated aqueous NH<sub>4</sub>Cl solution. The organic layer was extracted with ethyl acetate and the combined organic layers were washed with saturated aqueous NaCl solution, dried over anhydrous MgSO<sub>4</sub>, filtered and removed under vacuum. The residue was purified by a column chromatography on silica gel using ethyl acetate/petroleum ether as eluent to give the desired product **21** (70% yield). <sup>1</sup>H NMR (500 MHz, CDCl<sub>3</sub>) δ 7.69 (d, *J* = 8.6 Hz, 2H), 7.54 – 7.51 (m, 2H), 7.43 – 7.33 (m, 3H), 6.88 (d, *J* =

8.8 Hz, 2H), 5.66 (brs, 1H), 3.50 (brs, 1H);  $^{13}\text{C}$  NMR (126 MHz,  $\text{CDCl}_3$ )  $\delta$  156.6, 132.2, 129.7, 129.1, 128.7, 127.8, 123.6 (q,  $J = 285.5$  Hz), 121.1, 115.4, 88.3, 84.6, 73.4 (q,  $J = 32.6$  Hz); HRMS (ESI)  $m/z$  calculated for  $\text{C}_{16}\text{H}_{10}\text{F}_3\text{O}_2$   $[\text{M} - \text{H}]^-$  291.0638, found 291.0645.

## References

1. Chen, M.; Sun, J. W. *Angew. Chem. Int. Ed.* **2017**, *56*, 11966.
2. Chen, D. D.; Chen, W. M.; Feng, S.; Gao, L.; Shen, H.; Tan, X. F.; Wang, L. *PCT Int. Appl.* **2017**, 2017202798.
3. Kelly, C. B.; Mercadante, M. A.; Hamlin, T. A.; Fletcher, M. H.; Leadbeater, N. E. *J. Org. Chem.* **2012**, *77*, 8131.
4. Sumi, T.; Goseki, R.; Otsuka, H. *Chem. Commun.*, 2017, **53**, 11885.
5. Tsuchida, K.; Senda, Y.; Nakajima, K.; Nishibayashi, Y. *Angew. Chem. Int. Ed.* **2013**, *52*, 5146.
6. Sun, L.; Liu, P.; Wang, J.; Lu, P.; Wang, Y. G. *J. Org. Chem.* **2017**, *82*, 8407.
7. Frisch, M. J.; Trucks, G. W.; Schlegel, H. B.; Scuseria, G. E.; Robb, M. A.; Cheeseman, J. R.; Montgomery, J. A., Jr.; Vreven, T.; Kudin, K. N.; Burant, J. C.; Millam, J. M.; Iyengar, S. S.; Tomasi, J.; Barone, V.; Mennucci, B.; Cossi, M.; Scalmani, G.; Rega, N.; Petersson, G. A.; Nakatsuji, H.; Hada, M.; Ehara, M.; Toyota, K.; Fukuda, R.; Hasegawa, J.; Ishida, M.; Nakajima, T.; Honda, Y.; Kitao, O.; Nakai, H.; Klene, M.; Li, X.; Knox, J. E.; Hratchian, H. P.; Cross, J. B.; Bakken, V.; Adamo, C.; Jaramillo, J.; Gomperts, R.; Stratmann, R. E.; Yazyev, O.; Austin, A. J.; Cammi, R.; Pomelli, C.; Ochterski, J. W.; Ayala, P. Y.; Morokuma, K.; Voth, G. A.; Salvador, P.; Dannenberg, J. J.; Zakrzewski, V. G.; Dapprich, S.; Daniels, A. D.; Strain, M. C.; Farkas, O.; Malick, D. K.; Rabuck, A. D.; Raghavachari, K.; Foresman, J. B.; Ortiz, J. V.; Cui, Q.; Baboul, A. G.; Clifford, S.; Cioslowski, J.; Stefanov, B. B.; Liu, G.; Liashenko, A.; Piskorz, P.; Komaromi, I.; Martin, R. L.; Fox, D. J.; Keith, T.; Al-Laham, M. A.; Peng, C. Y.; Nanayakkara, A.; Challacombe, M.; Gill, P. M. W.; Johnson, B.; Chen, W.; Wong, M. W.; Gonzalez, C.; Pople, J. A. Gaussian03, revision A.1; Gaussian, Inc.: Pittsburgh, PA, 2004.
8. Philip J. S.; Nobuyuki H. *Chirality*, **2010**, *22*, 229.

# NMR spectra

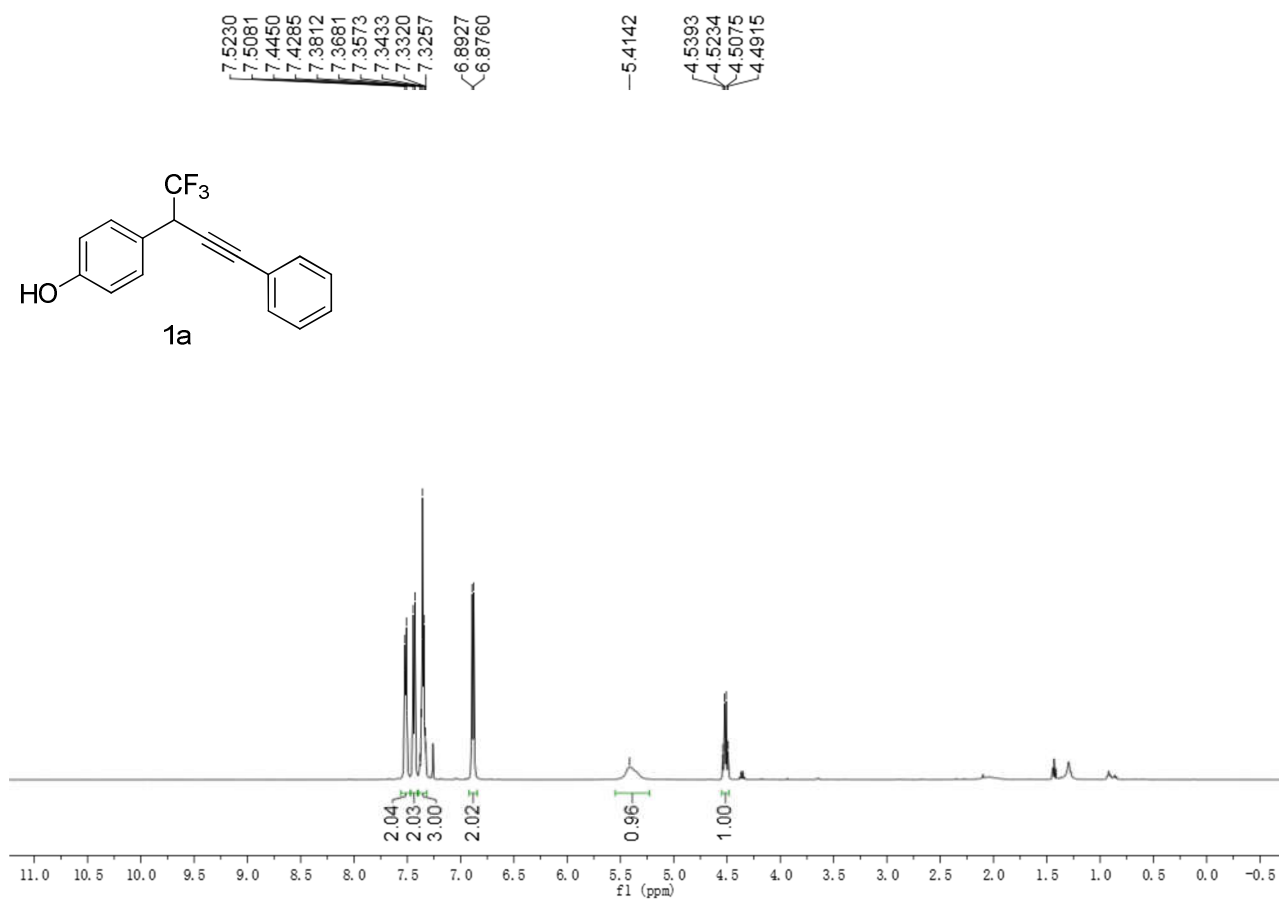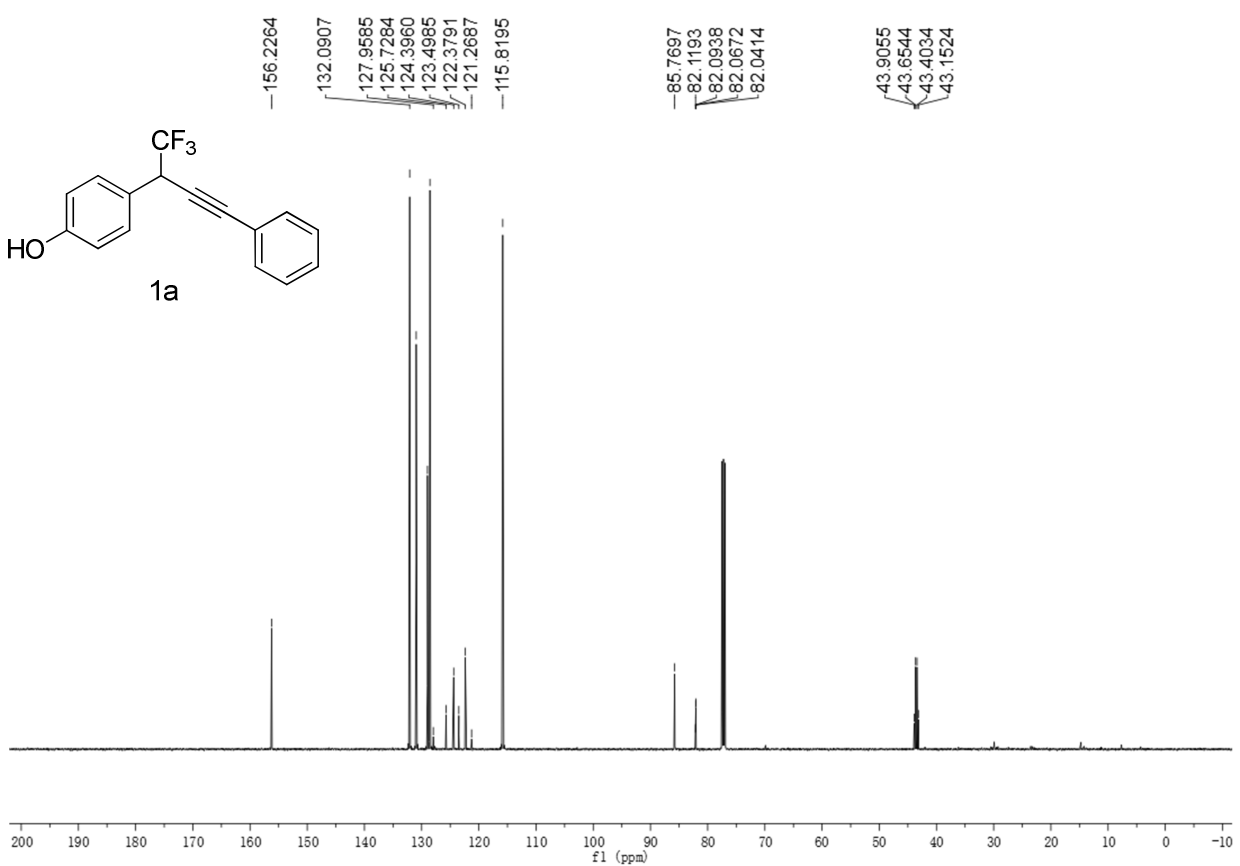

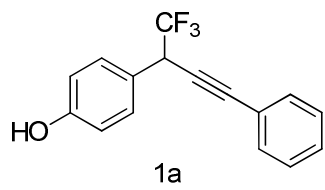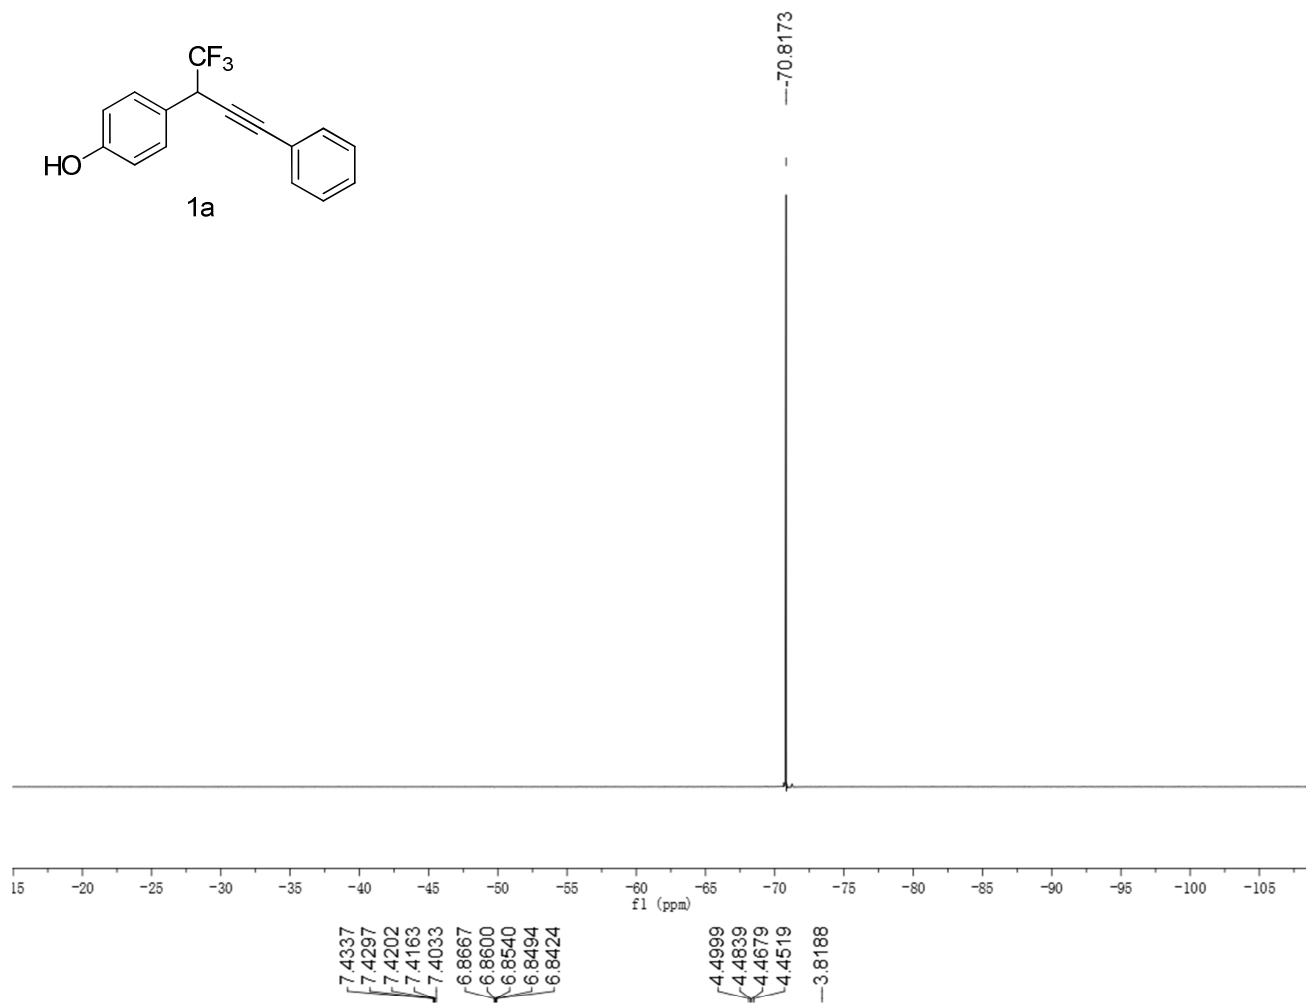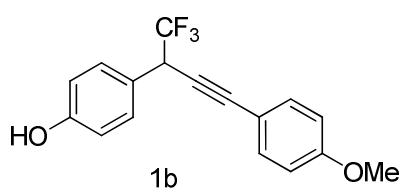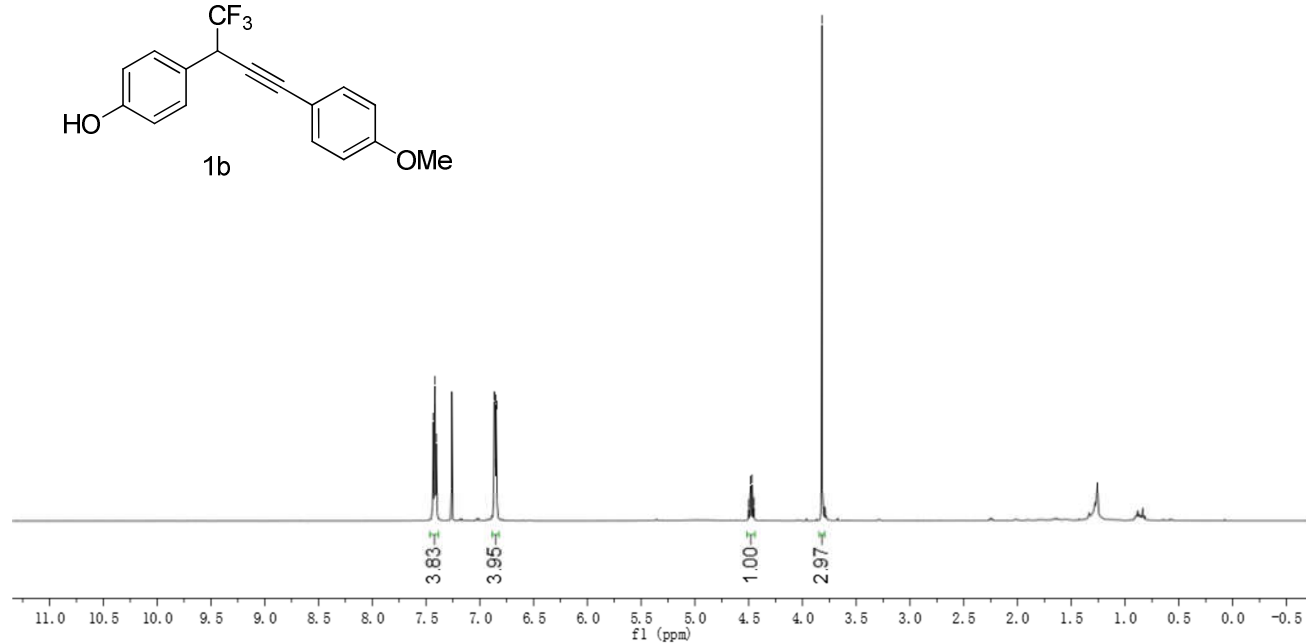

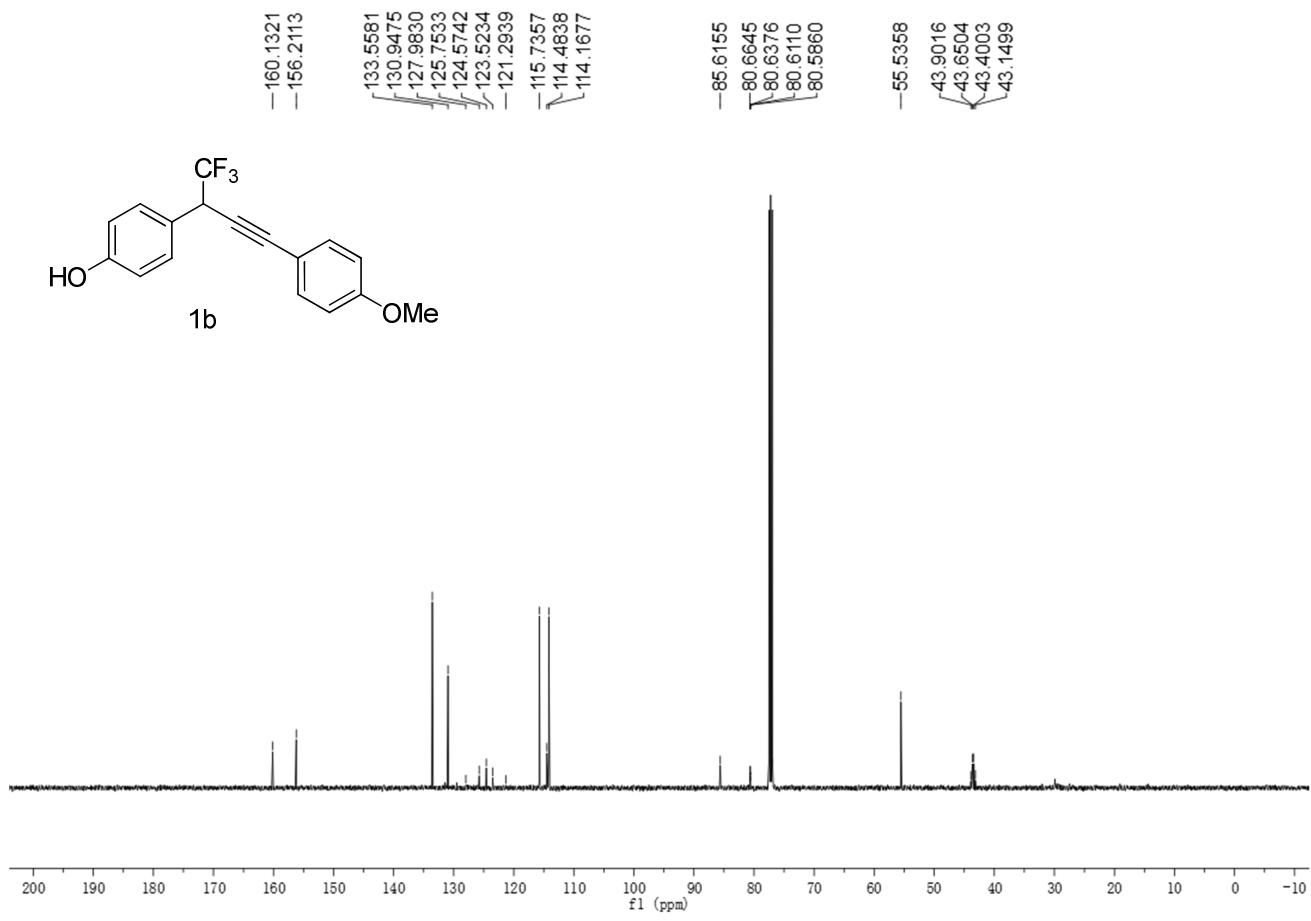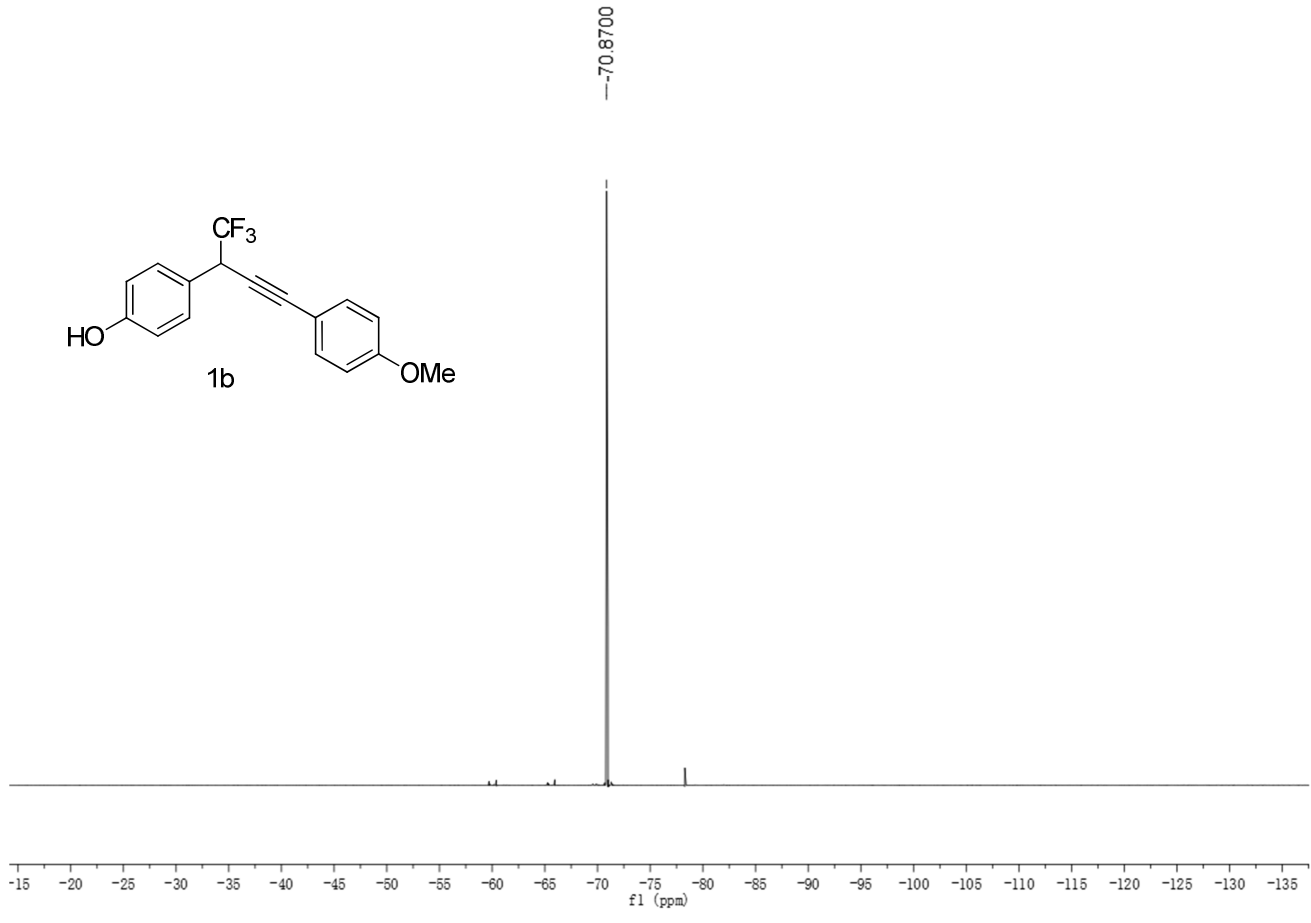

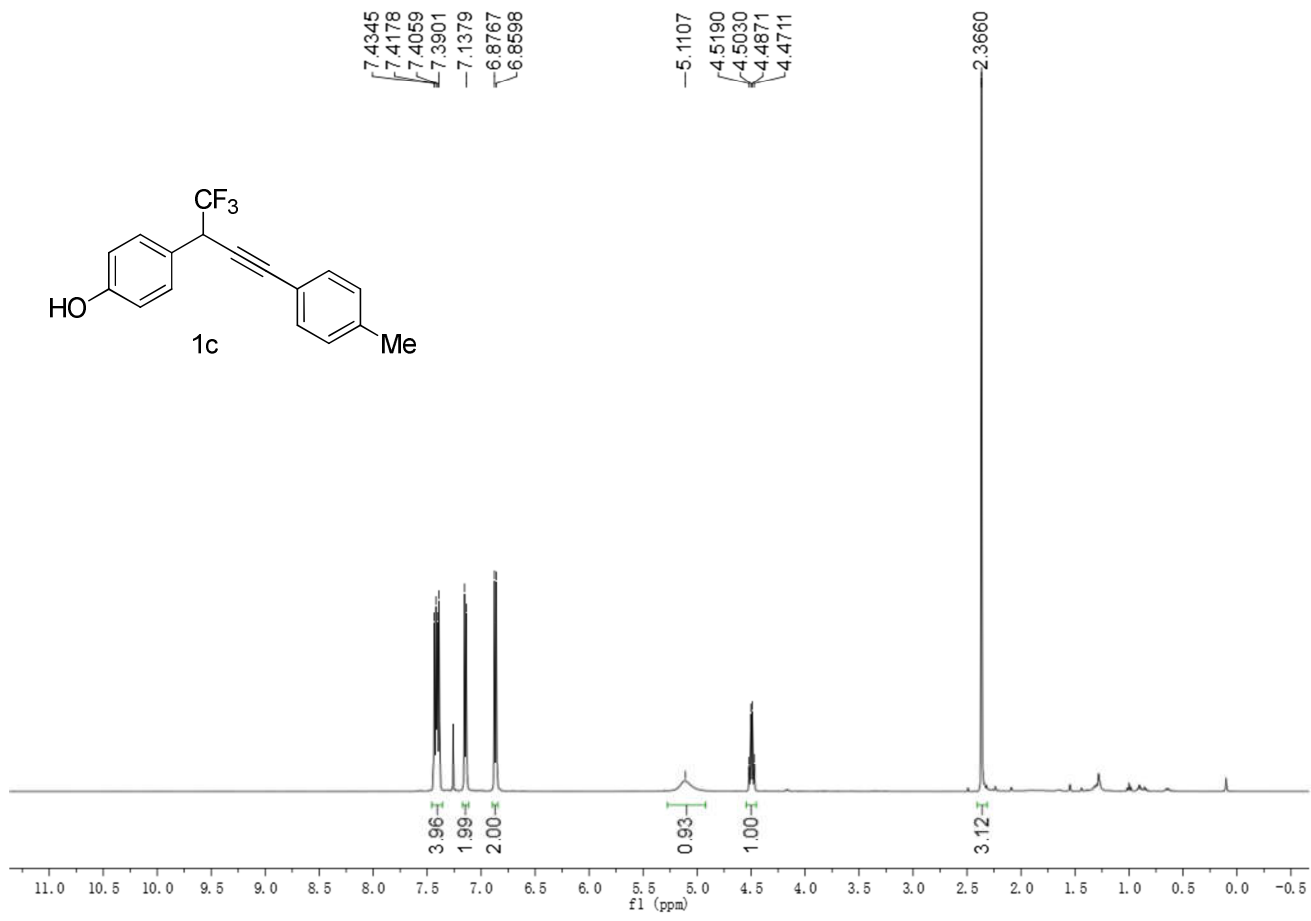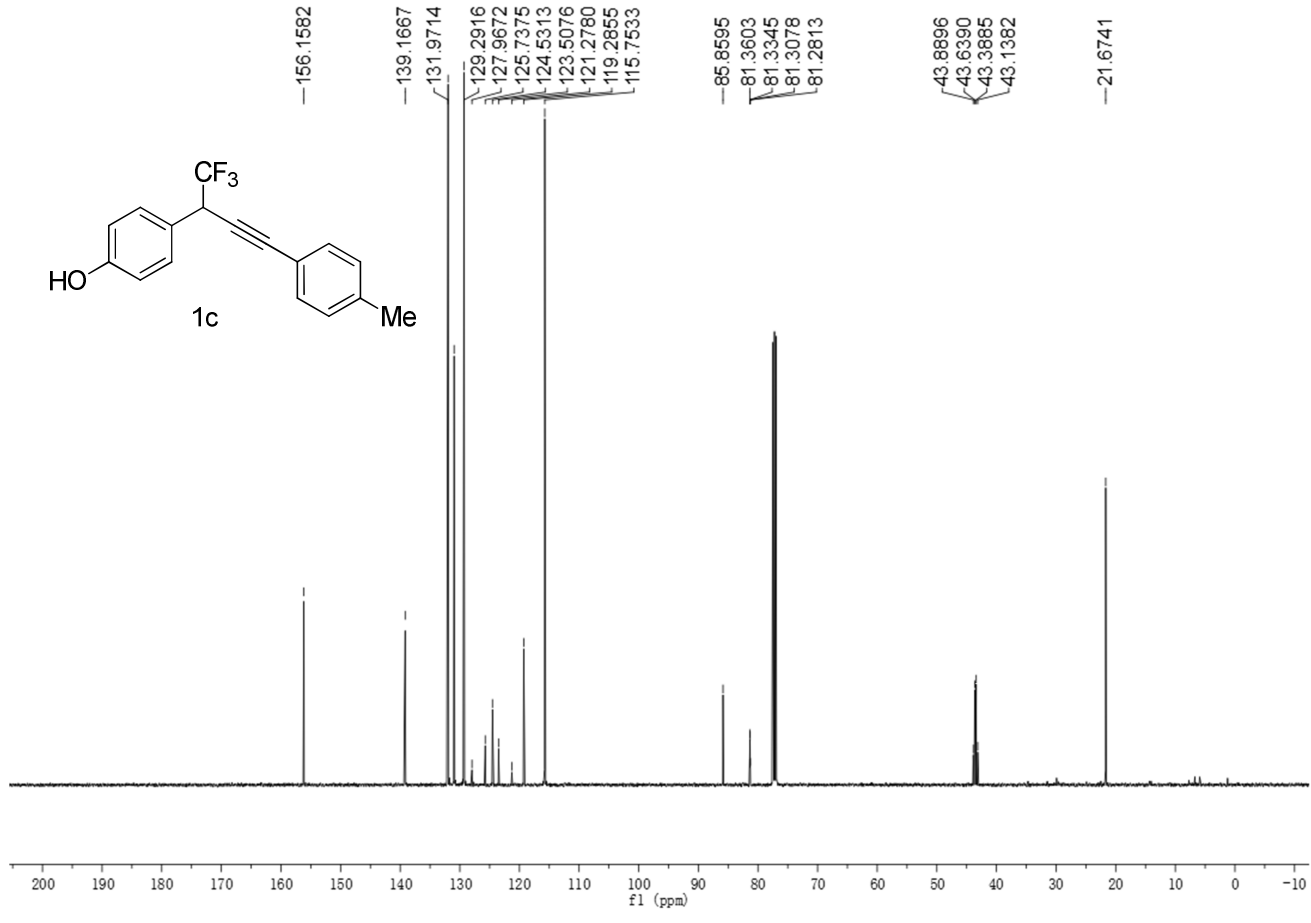

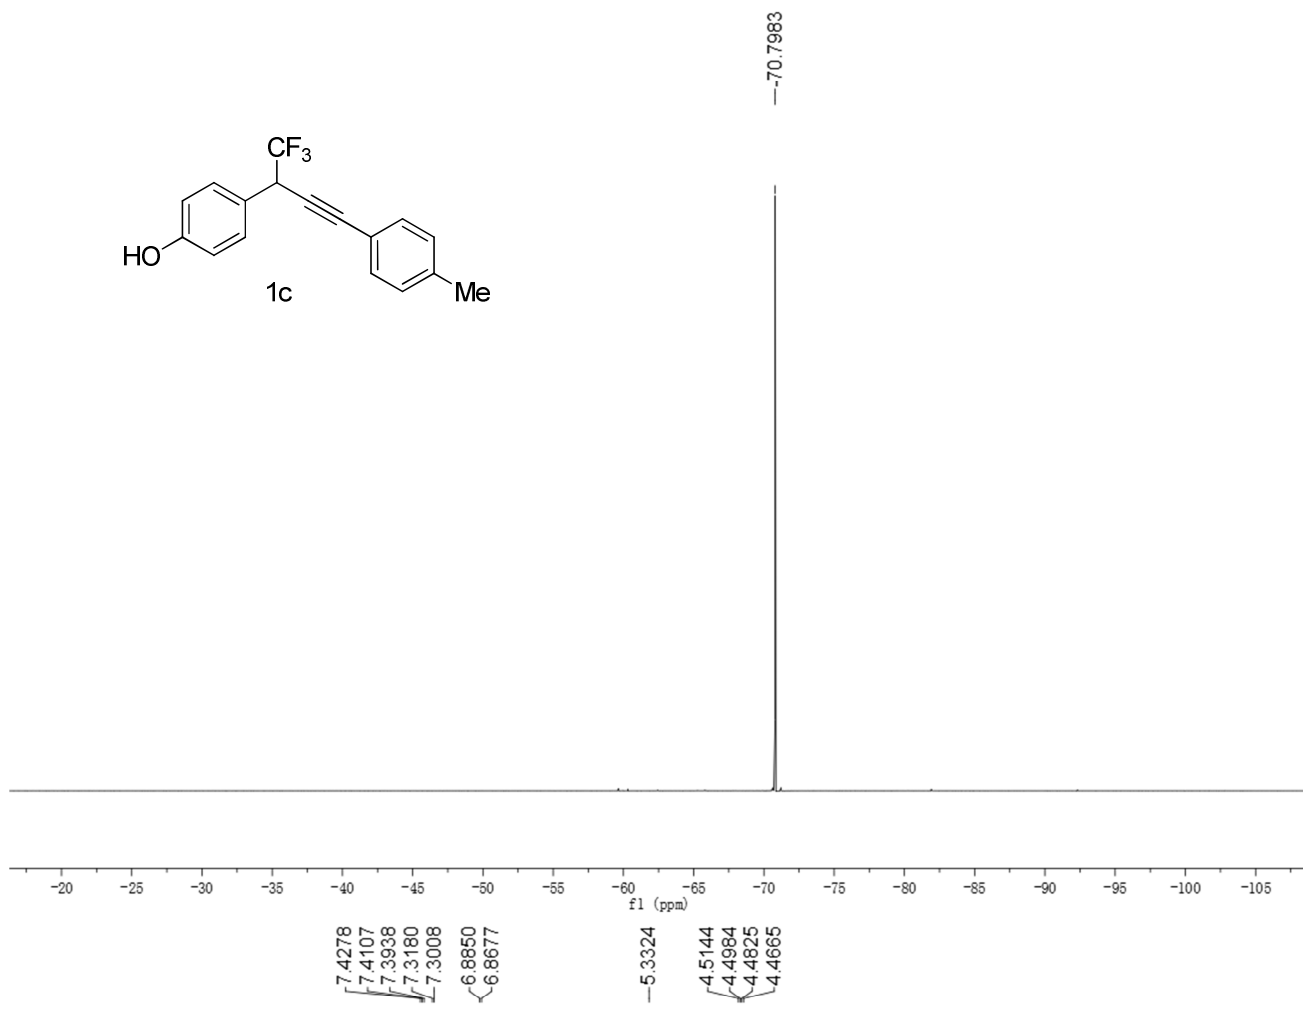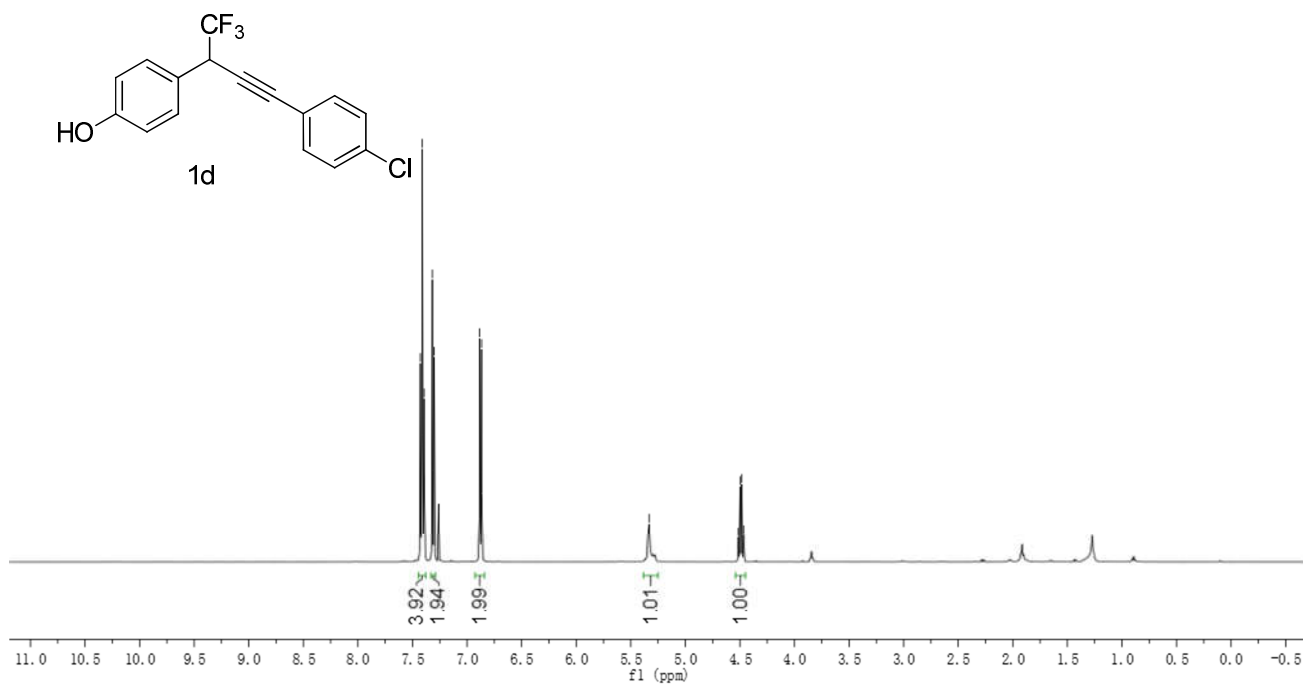



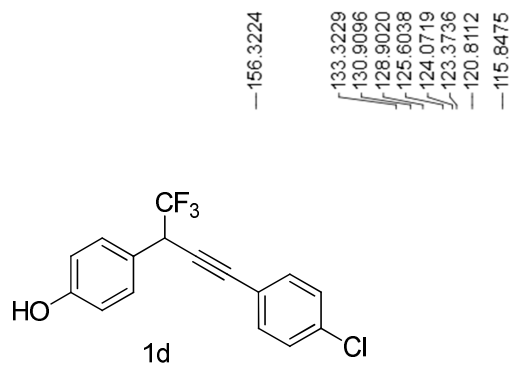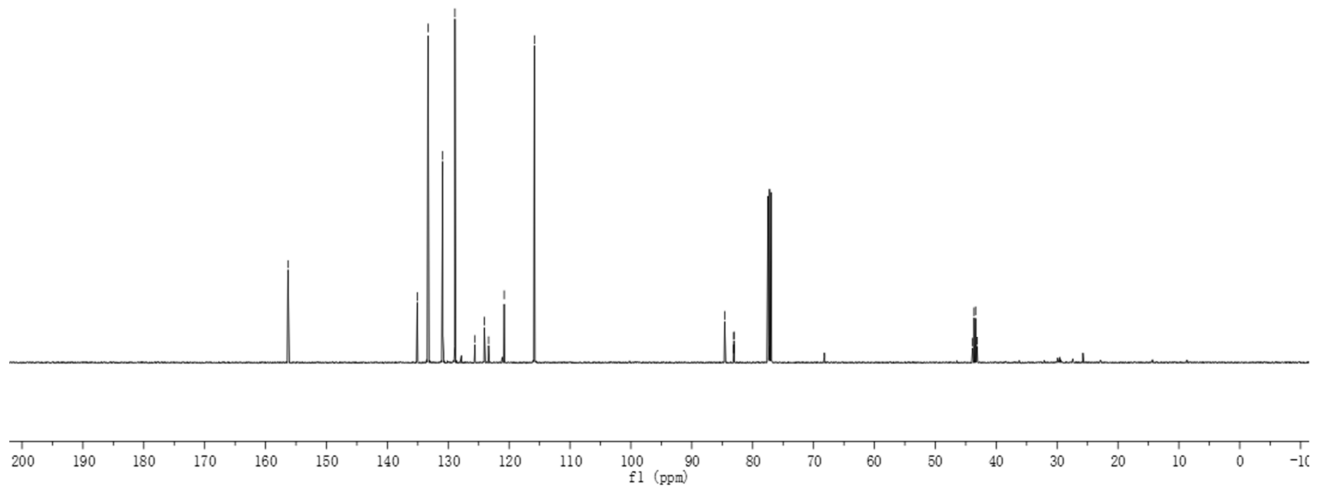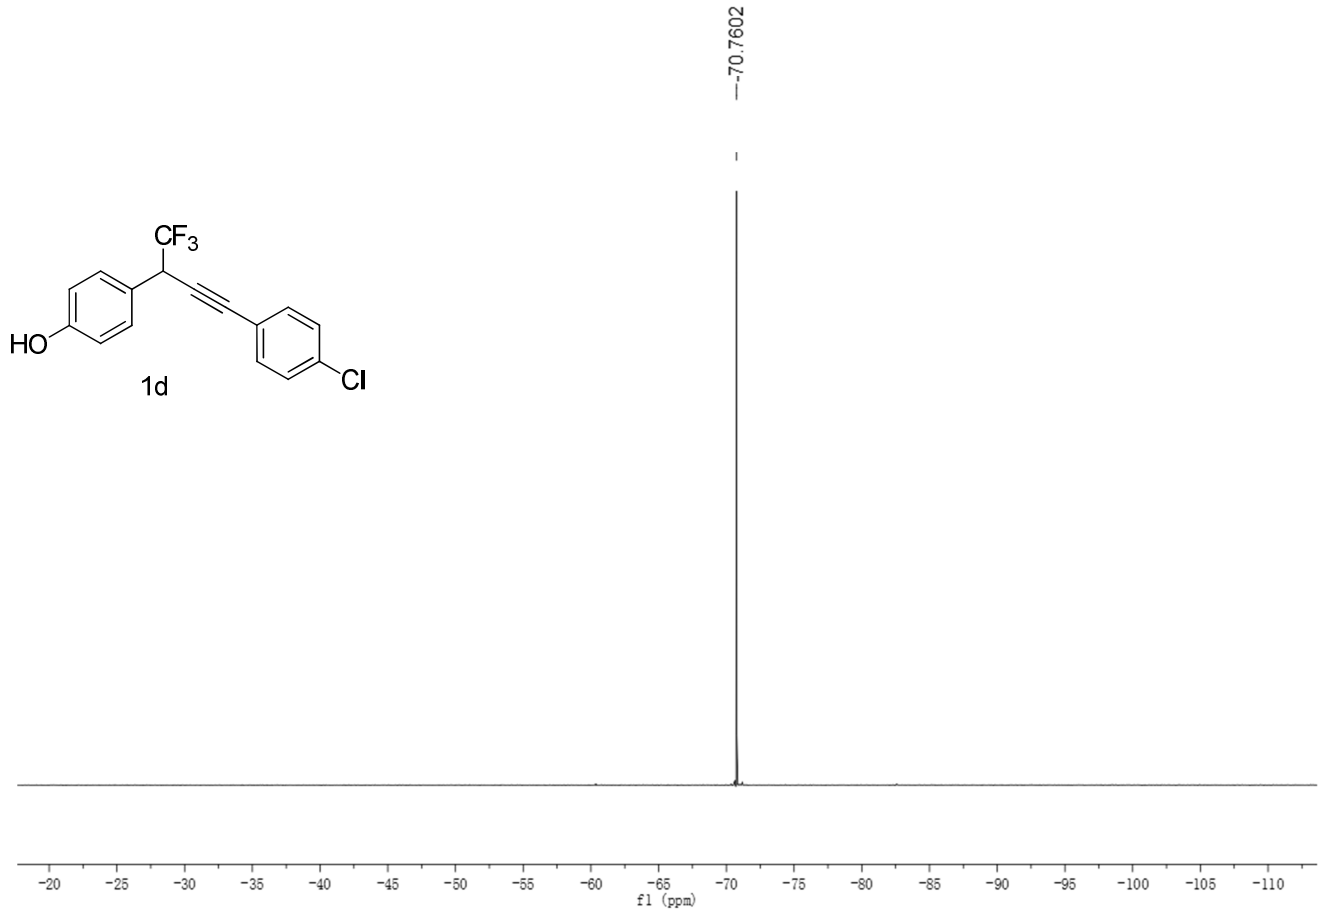

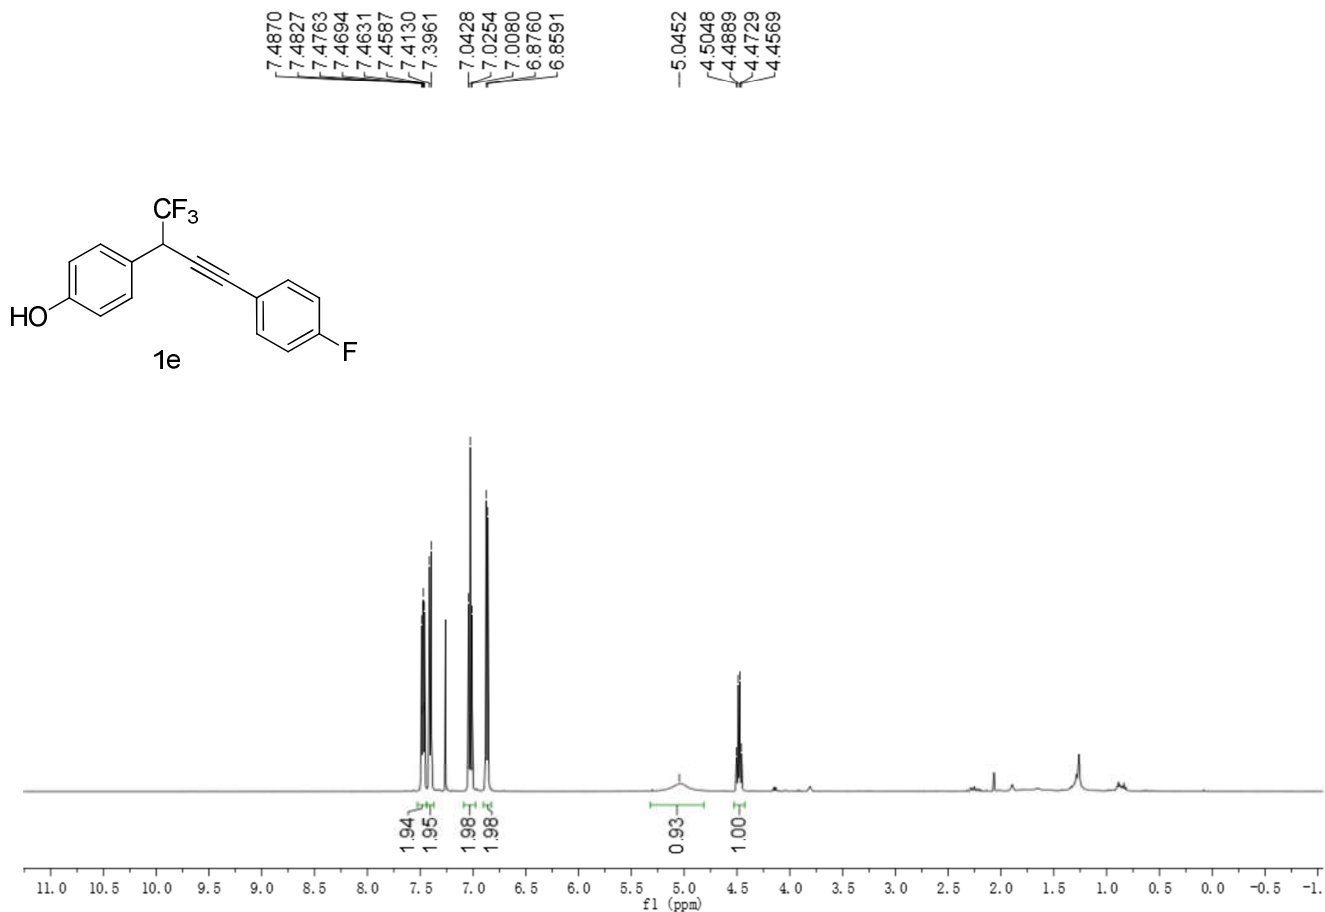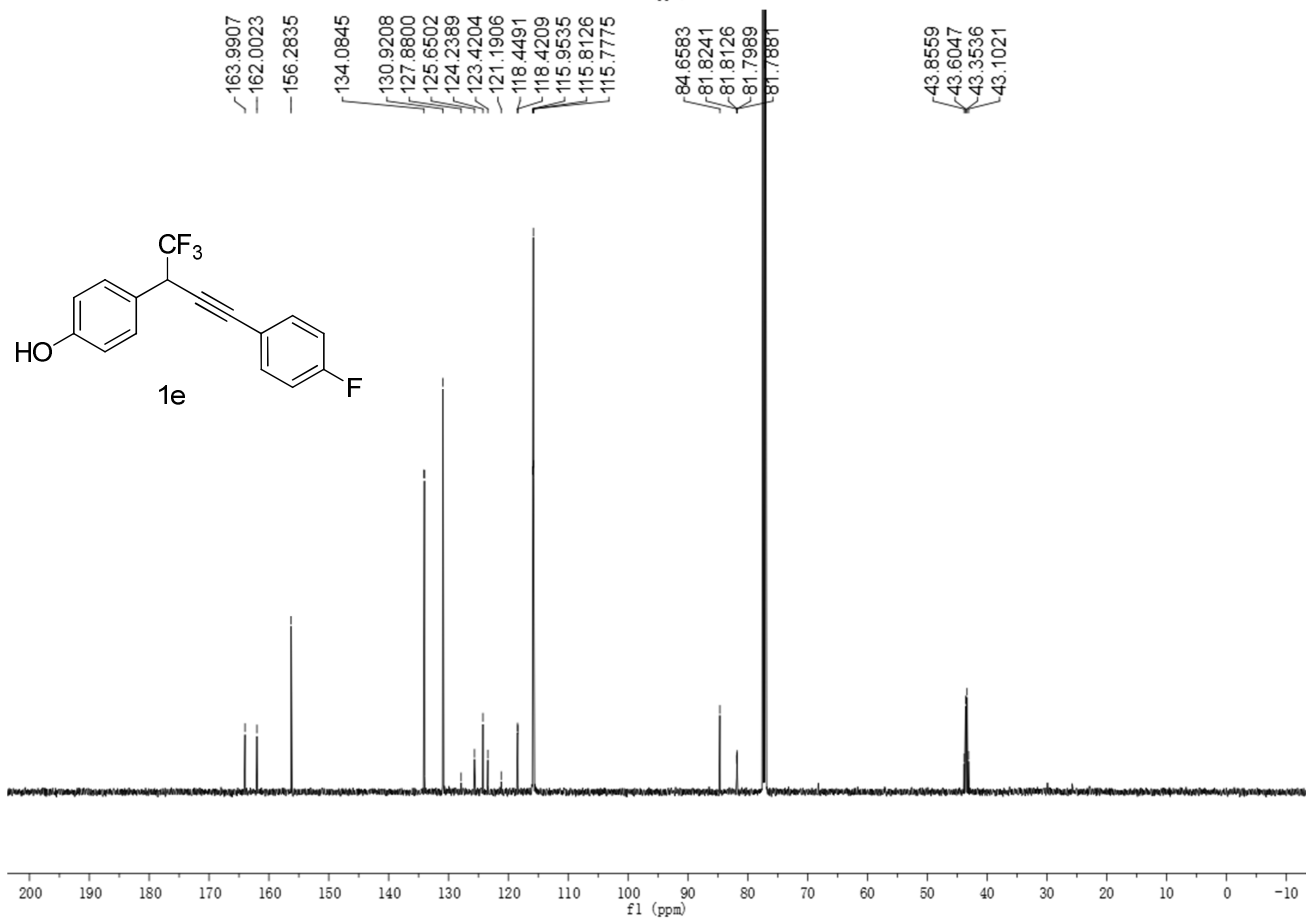

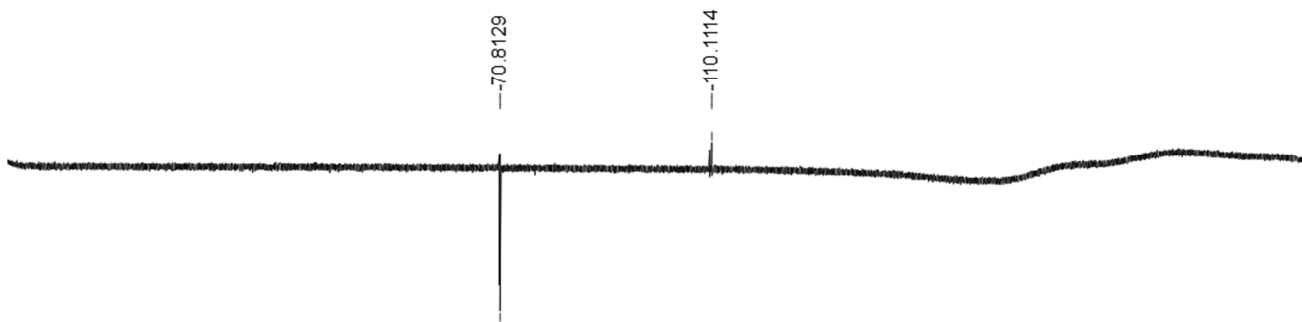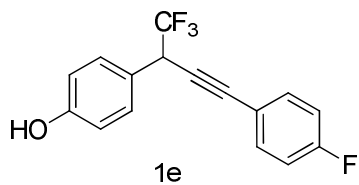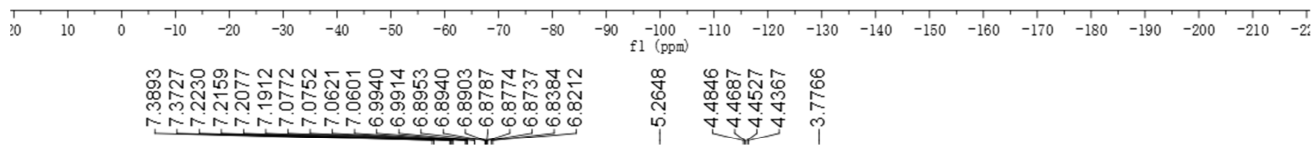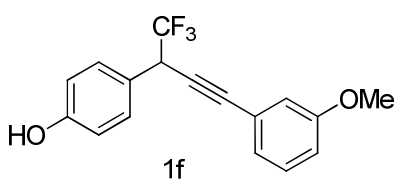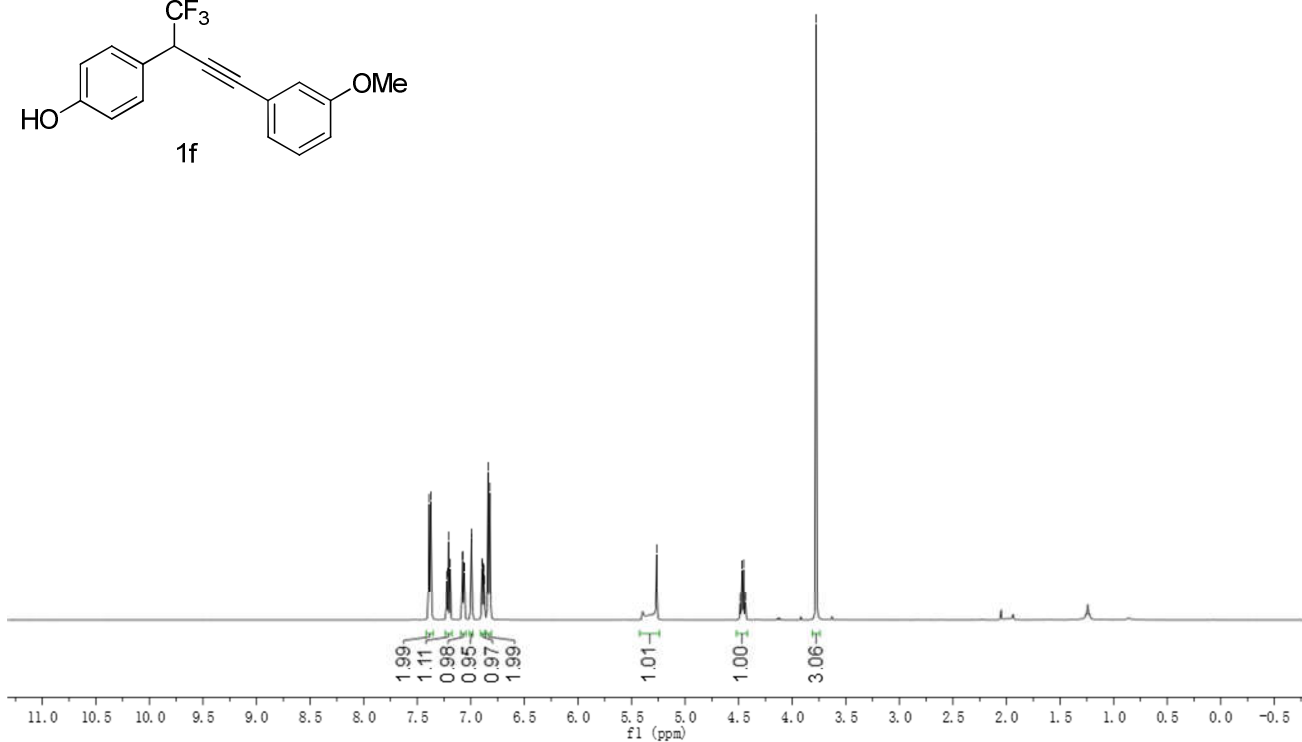

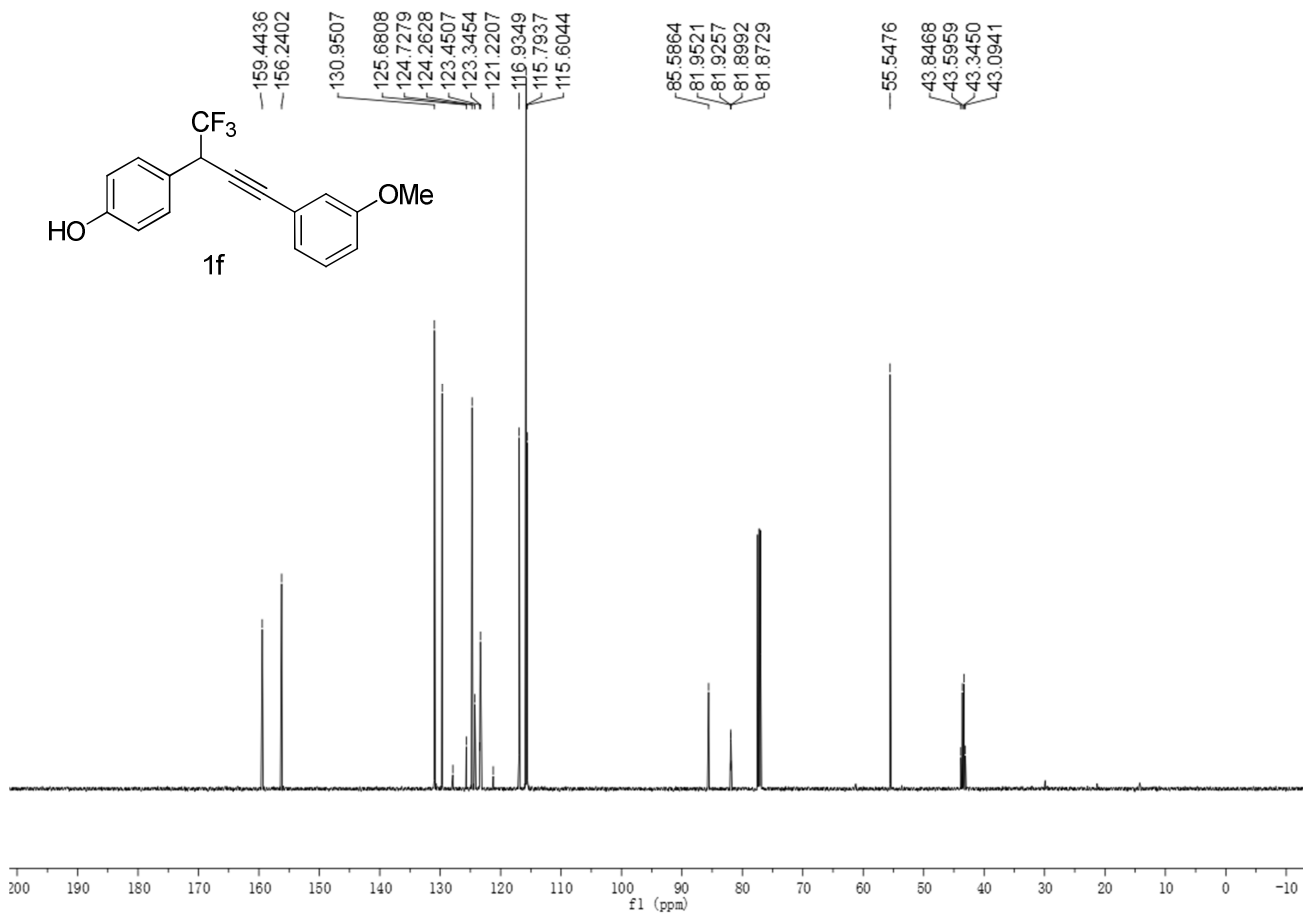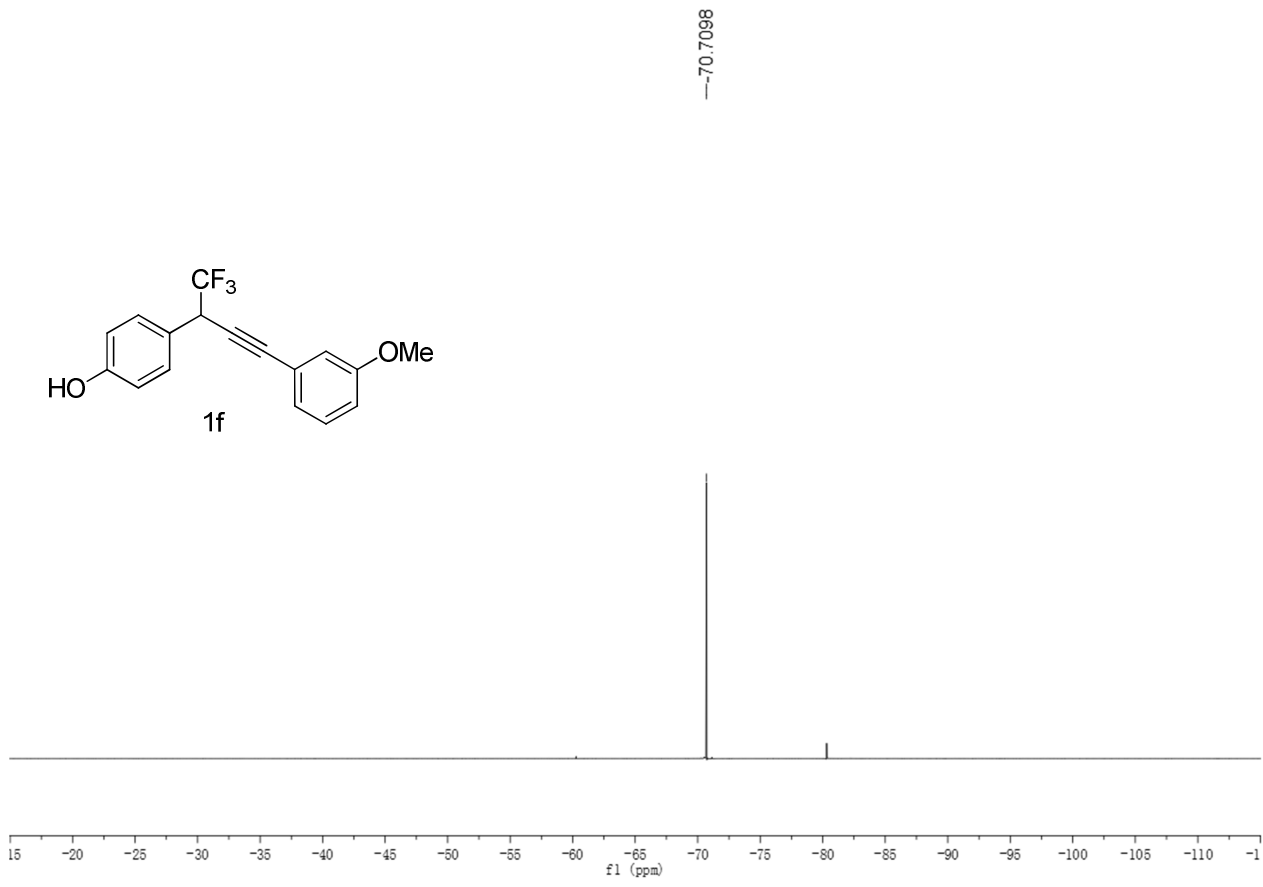

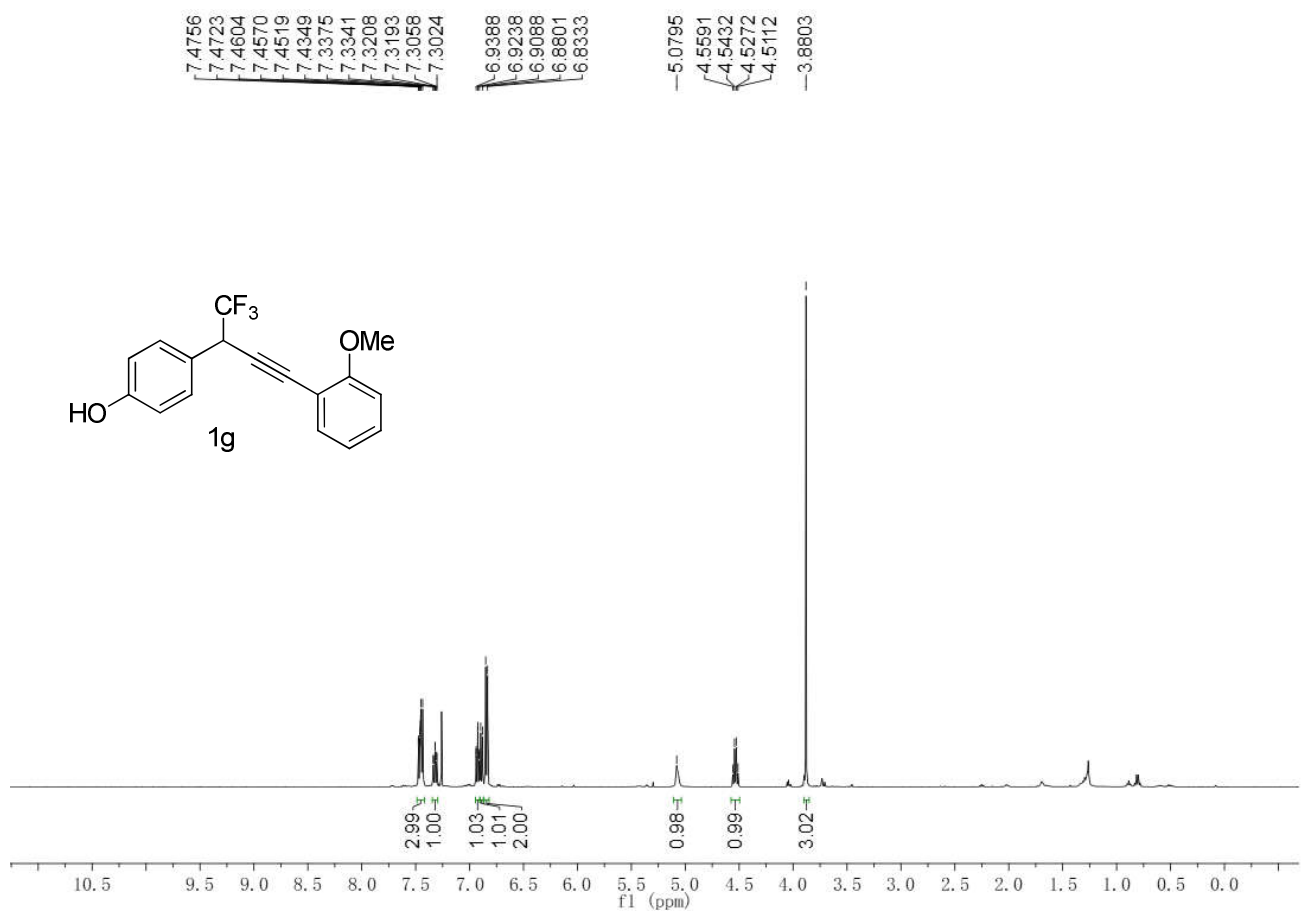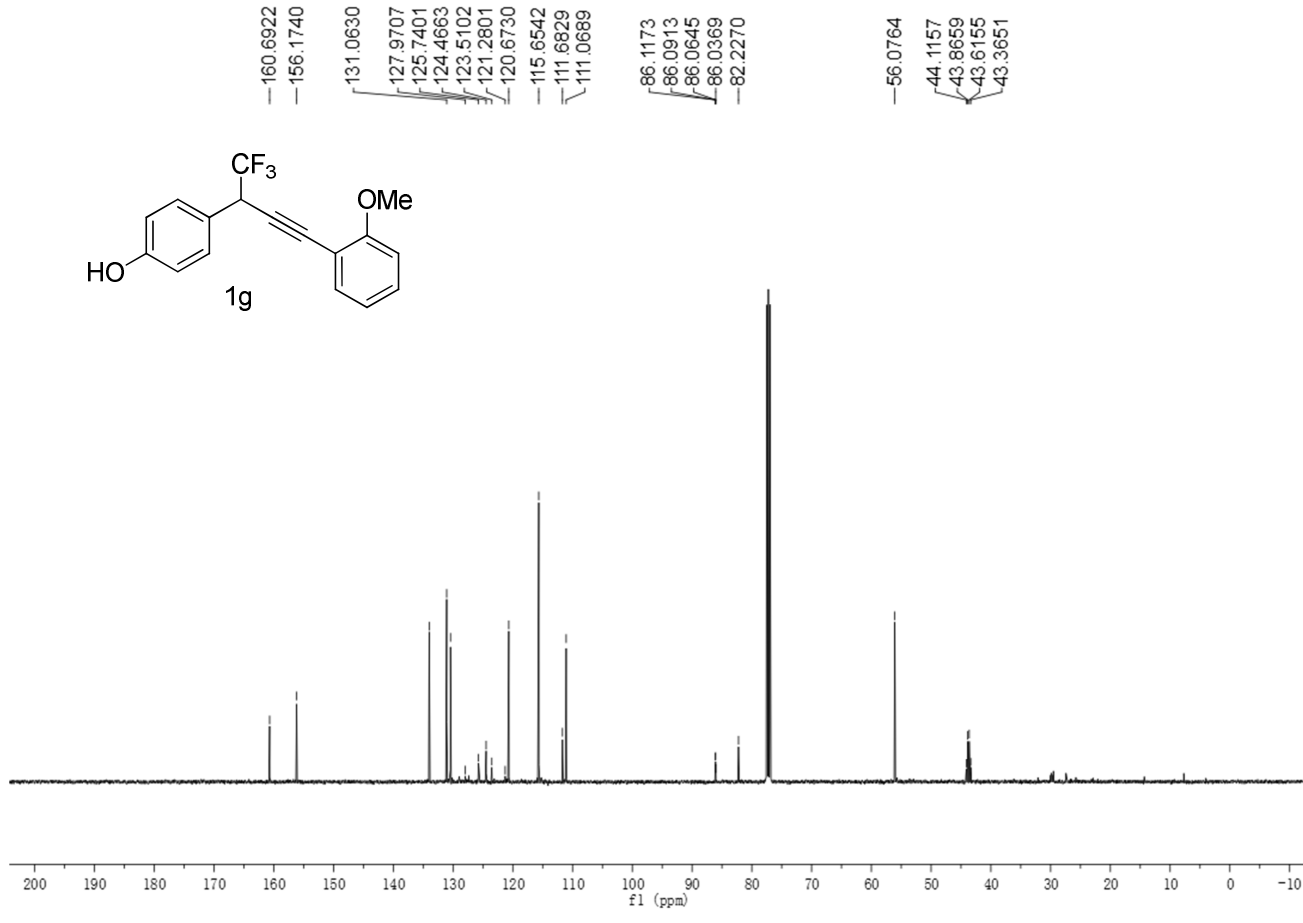

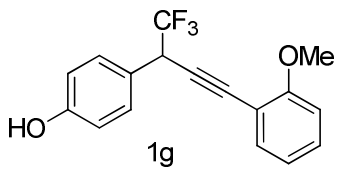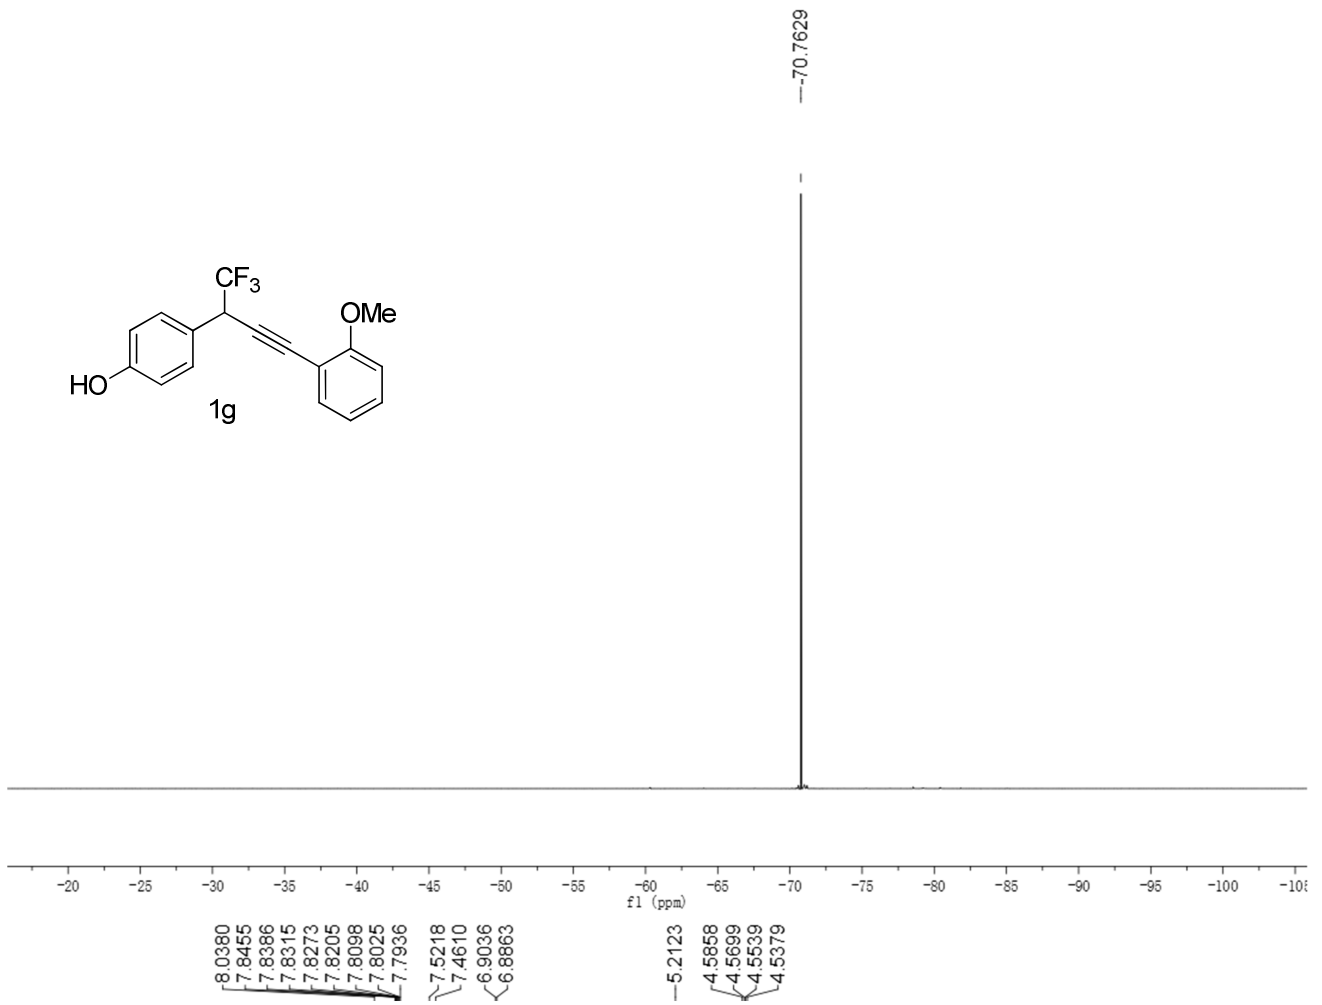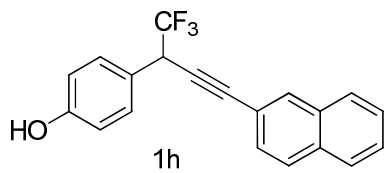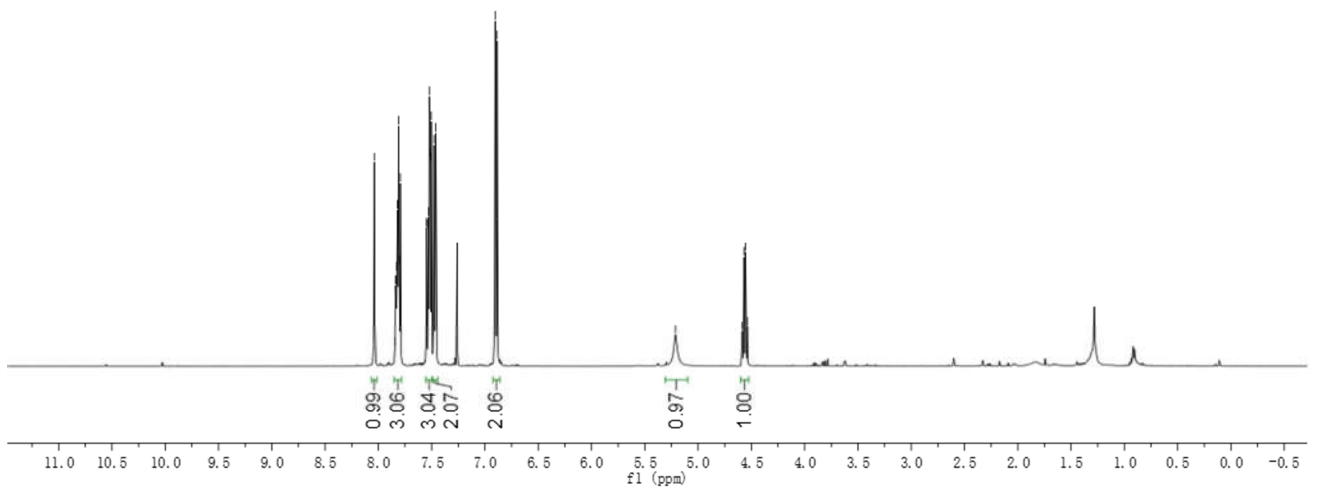

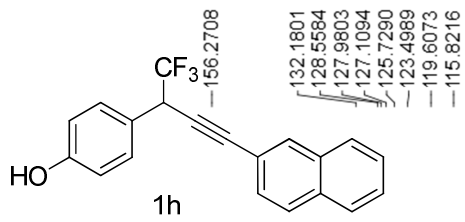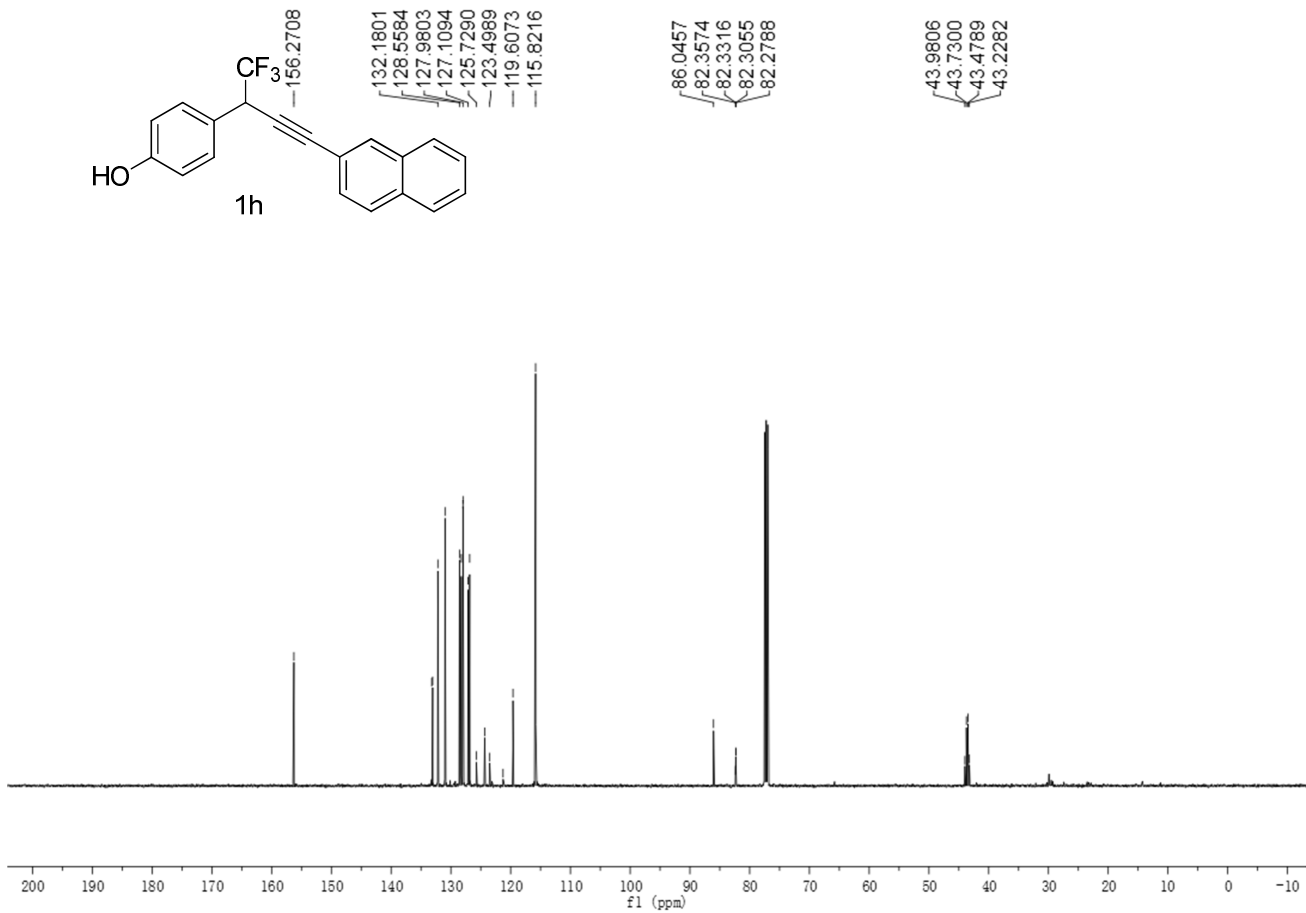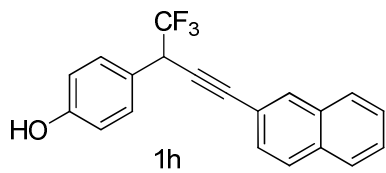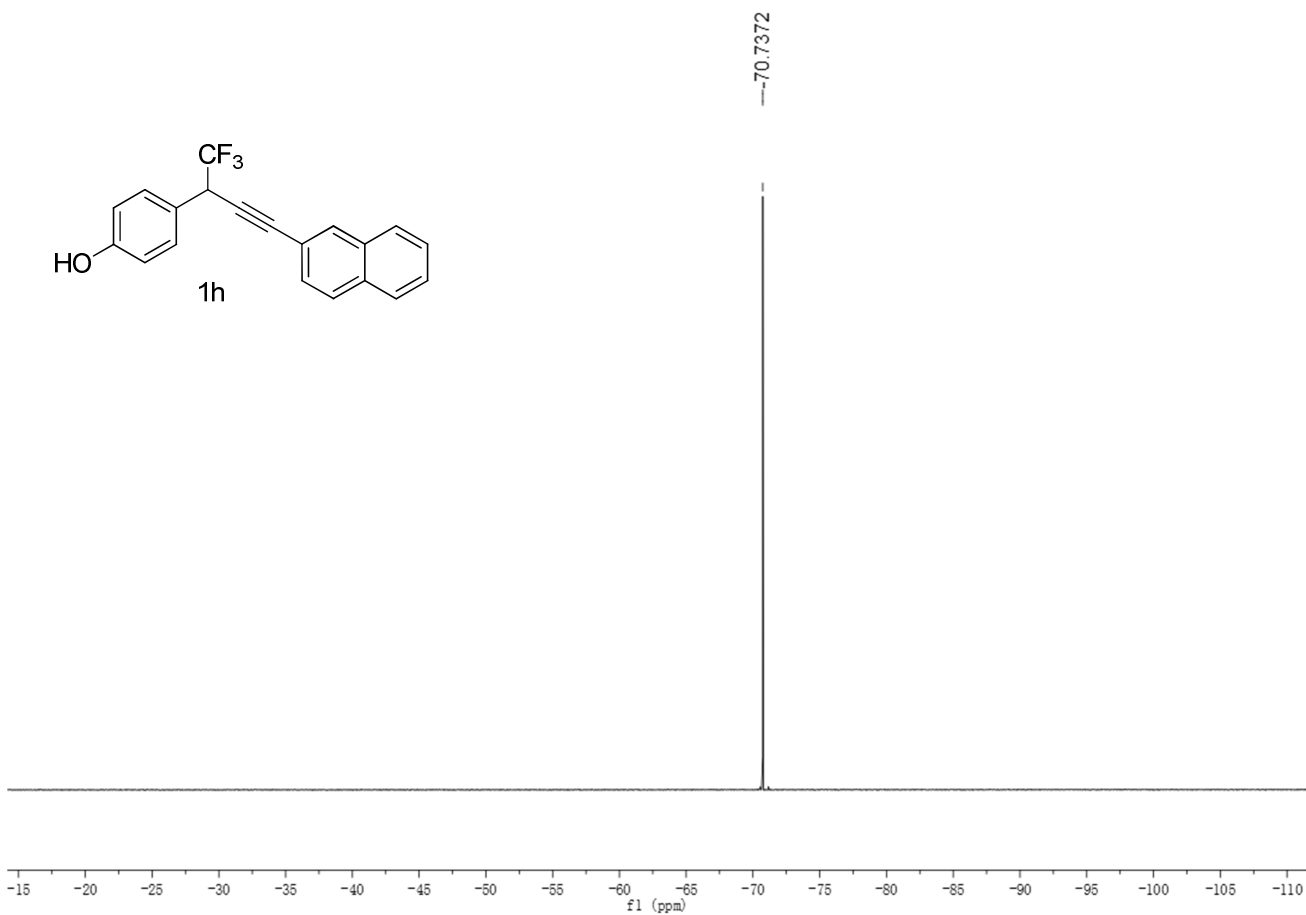

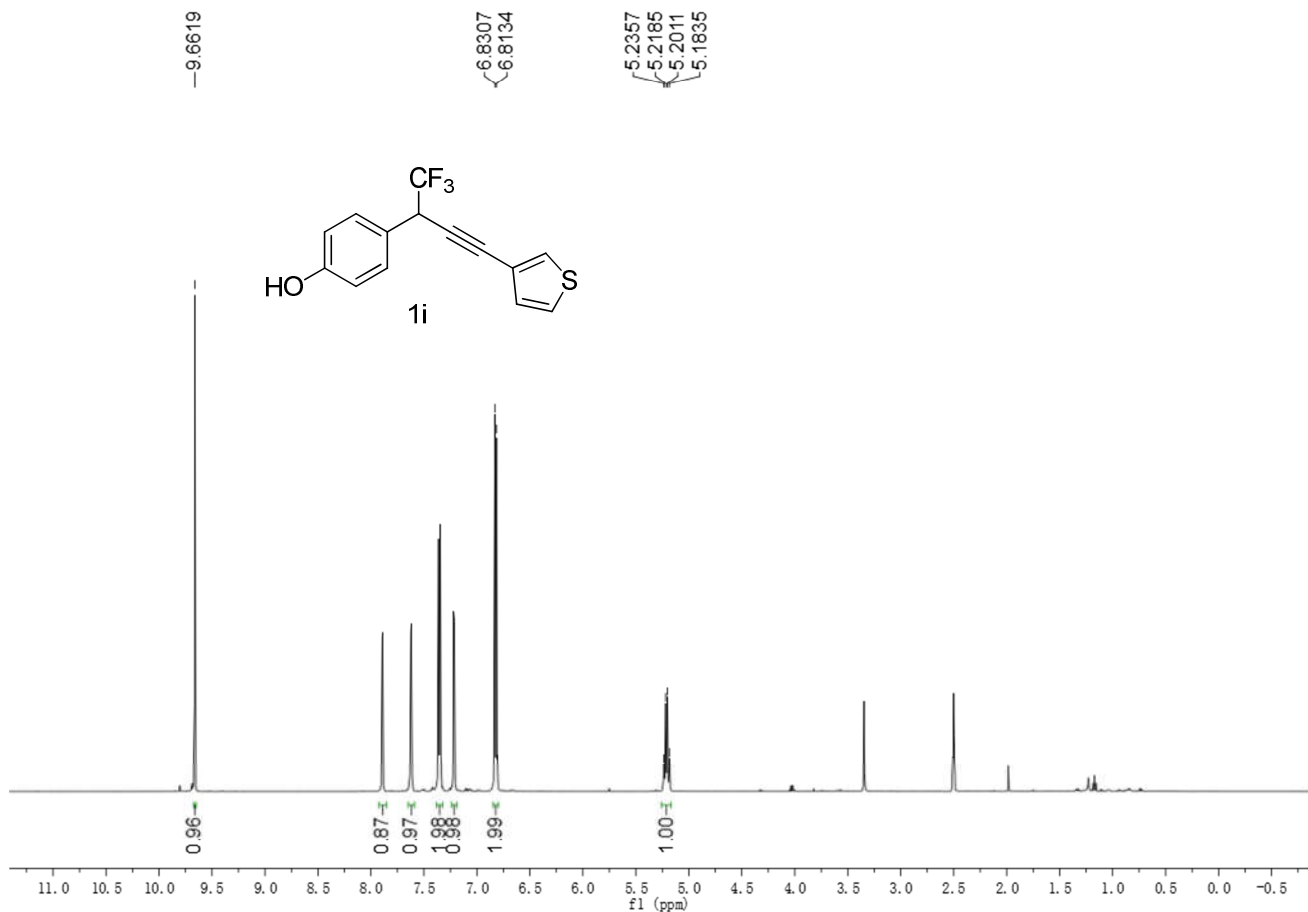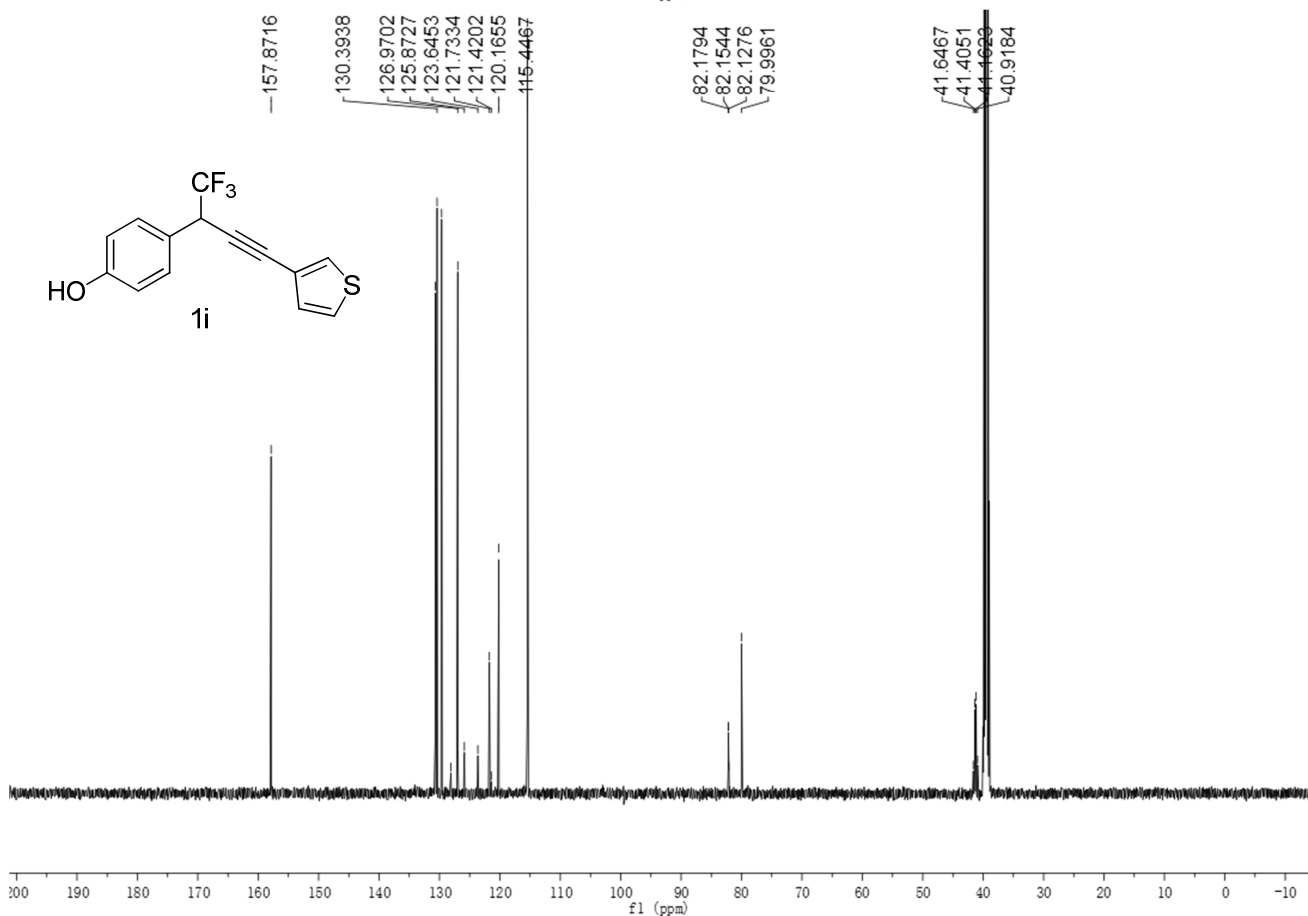



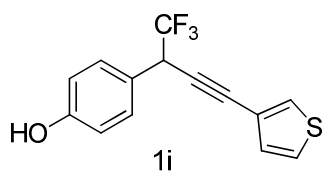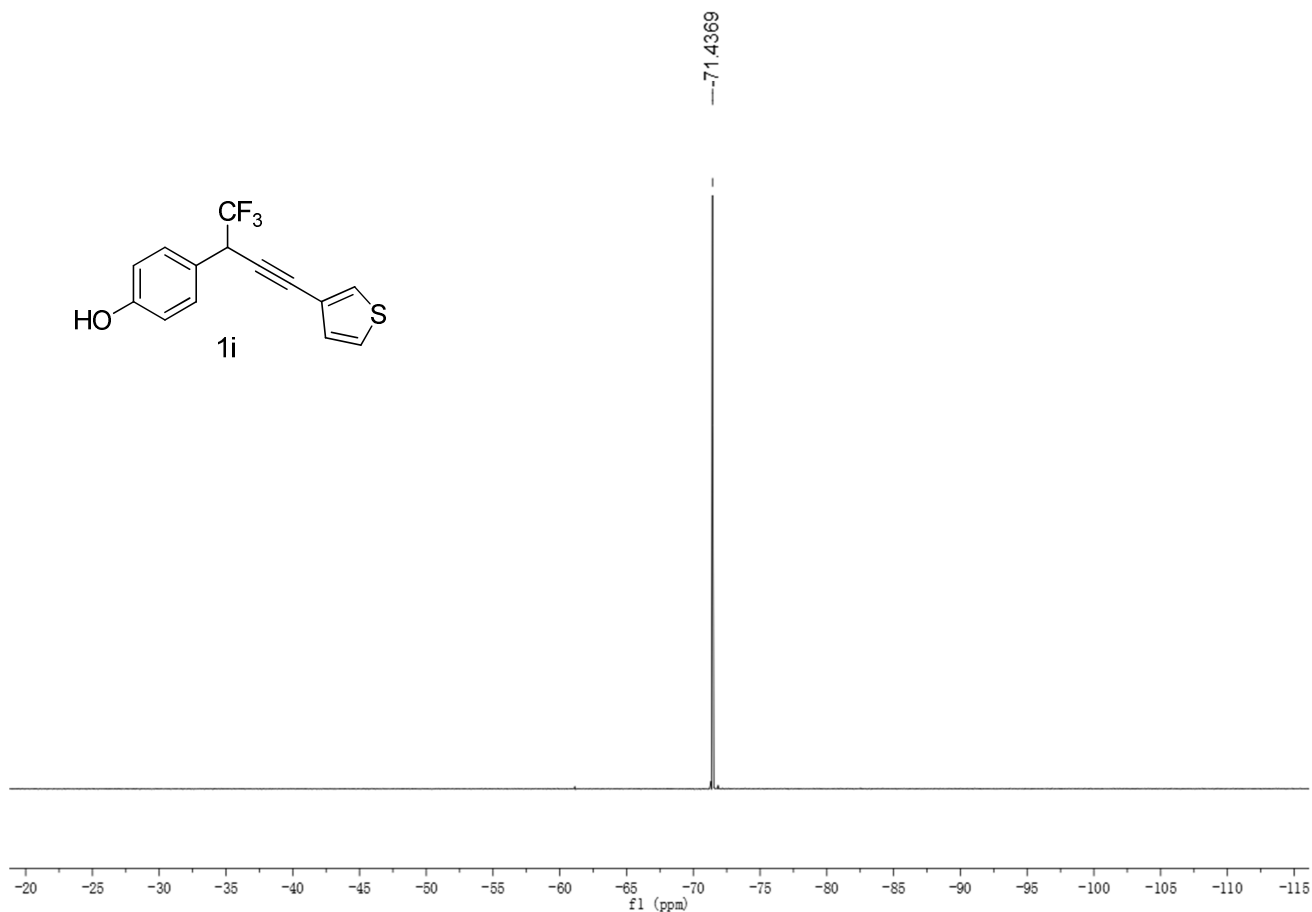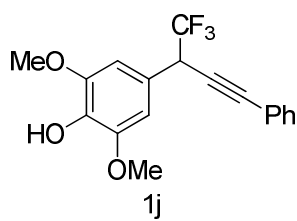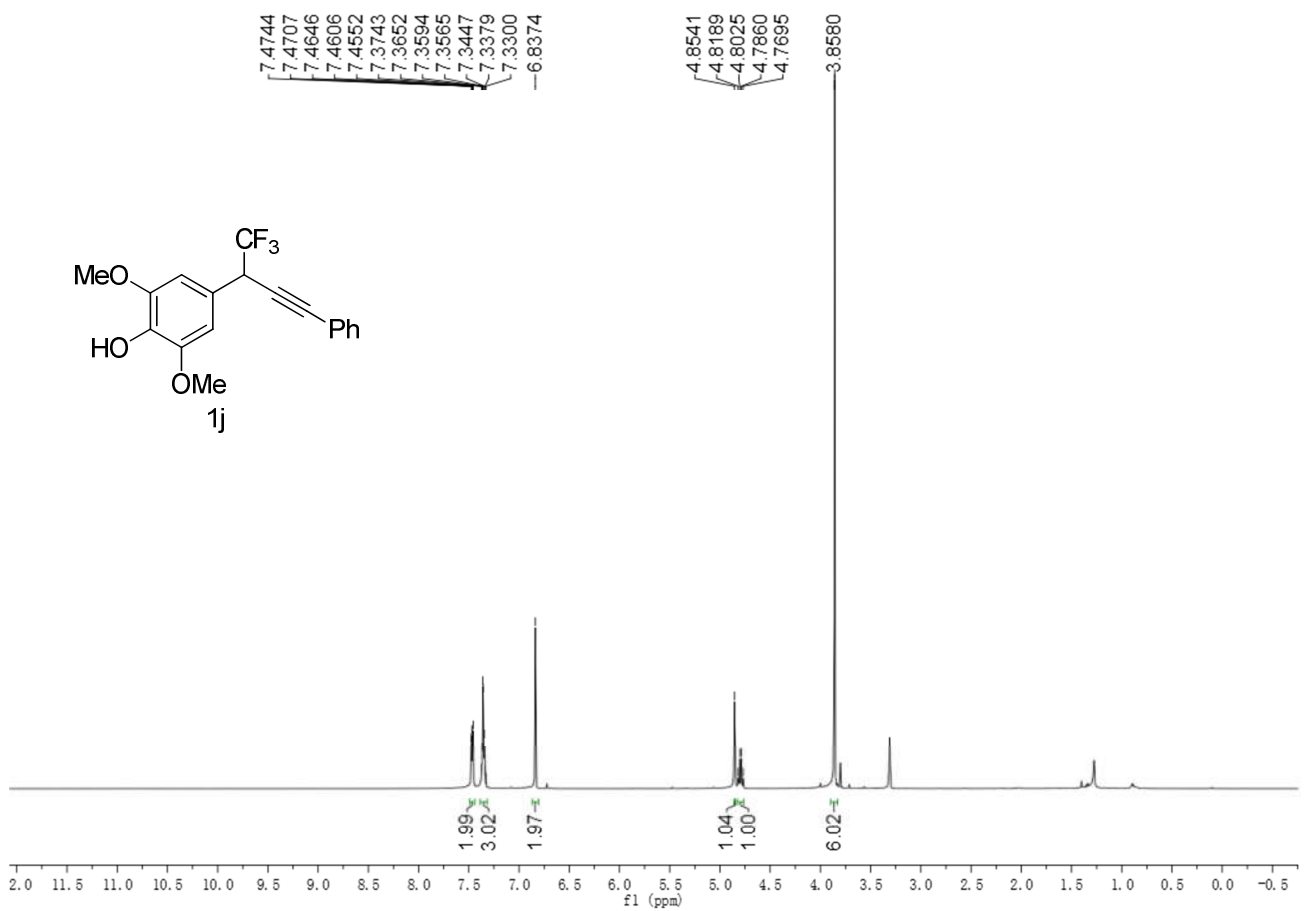

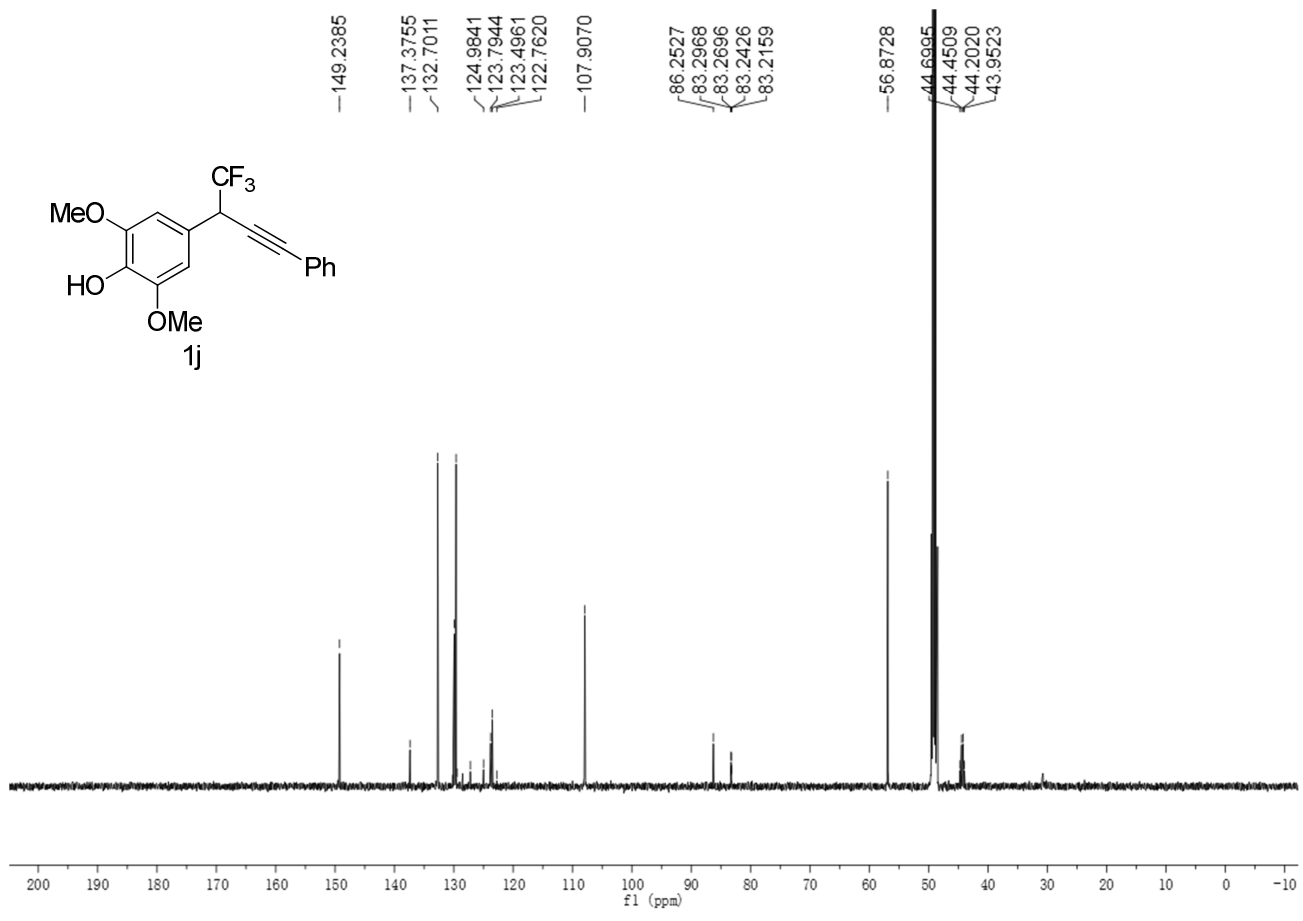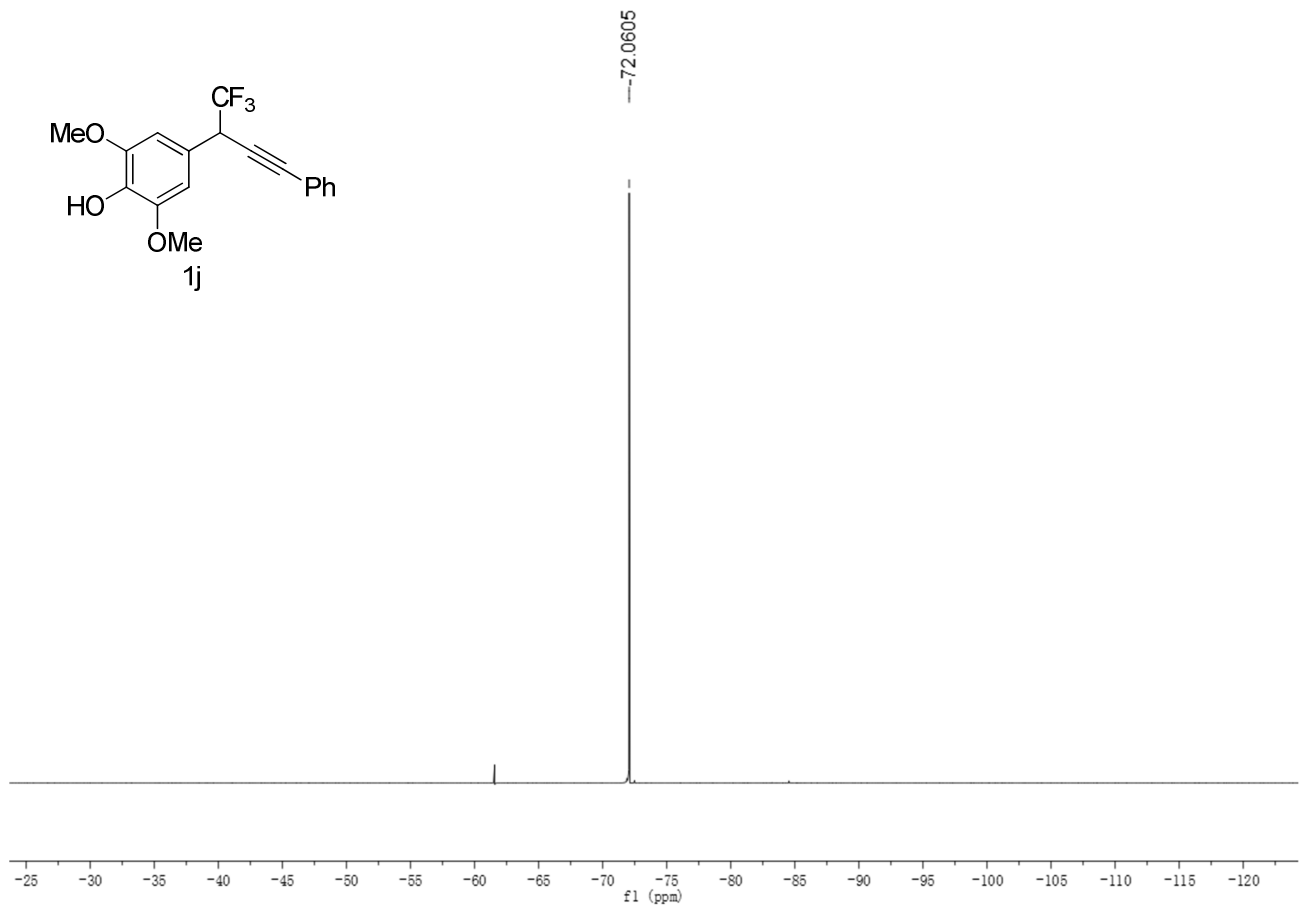

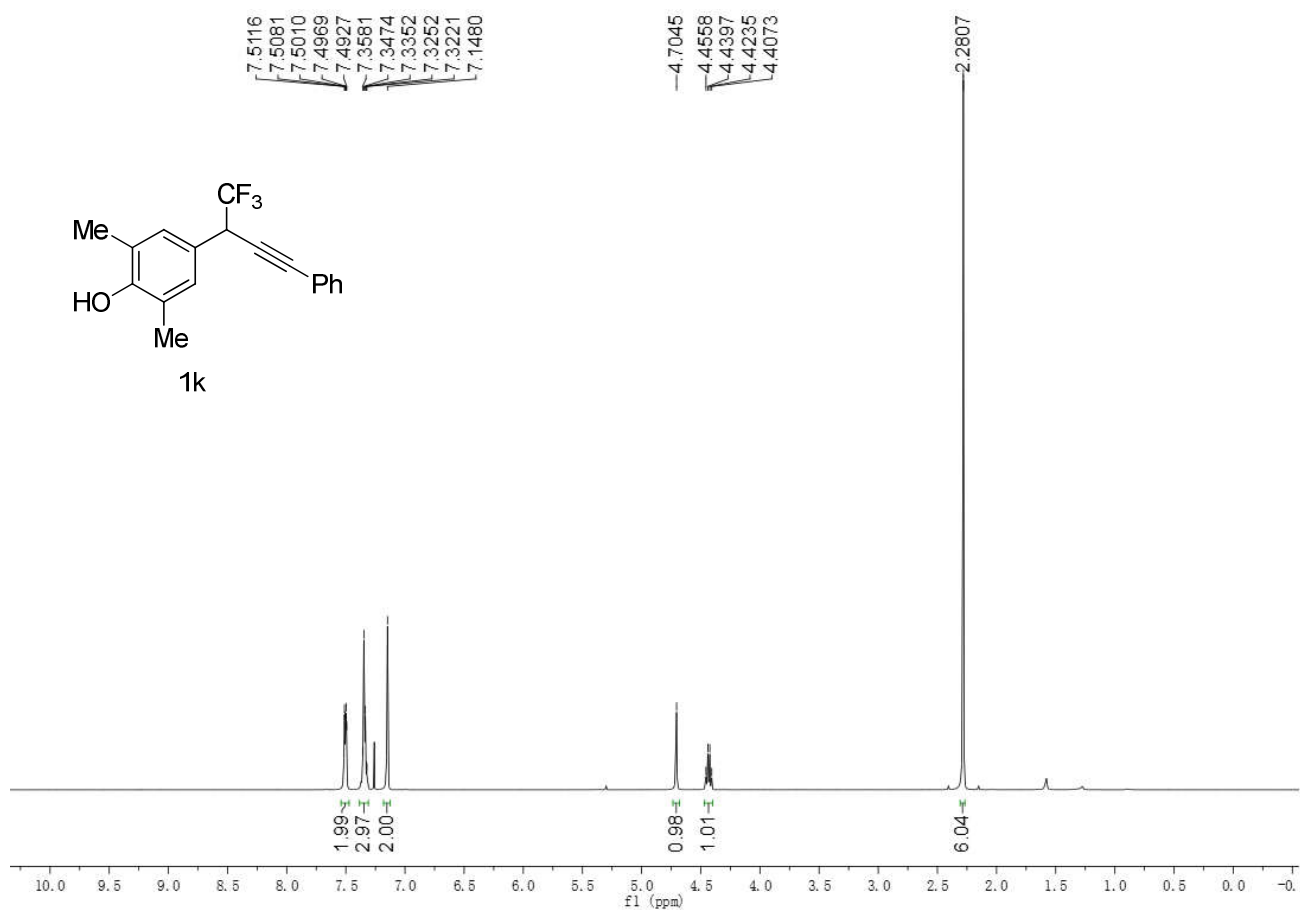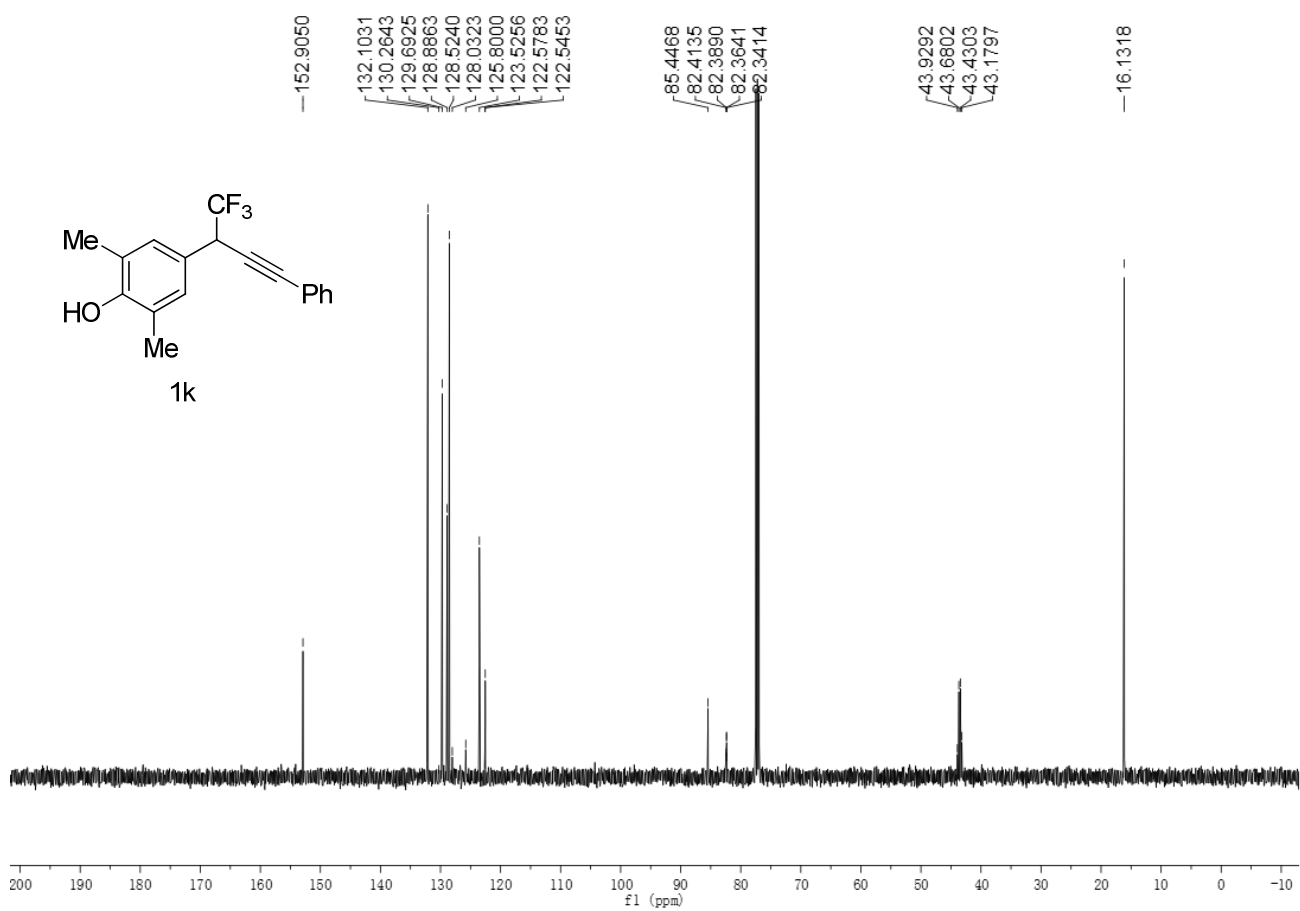

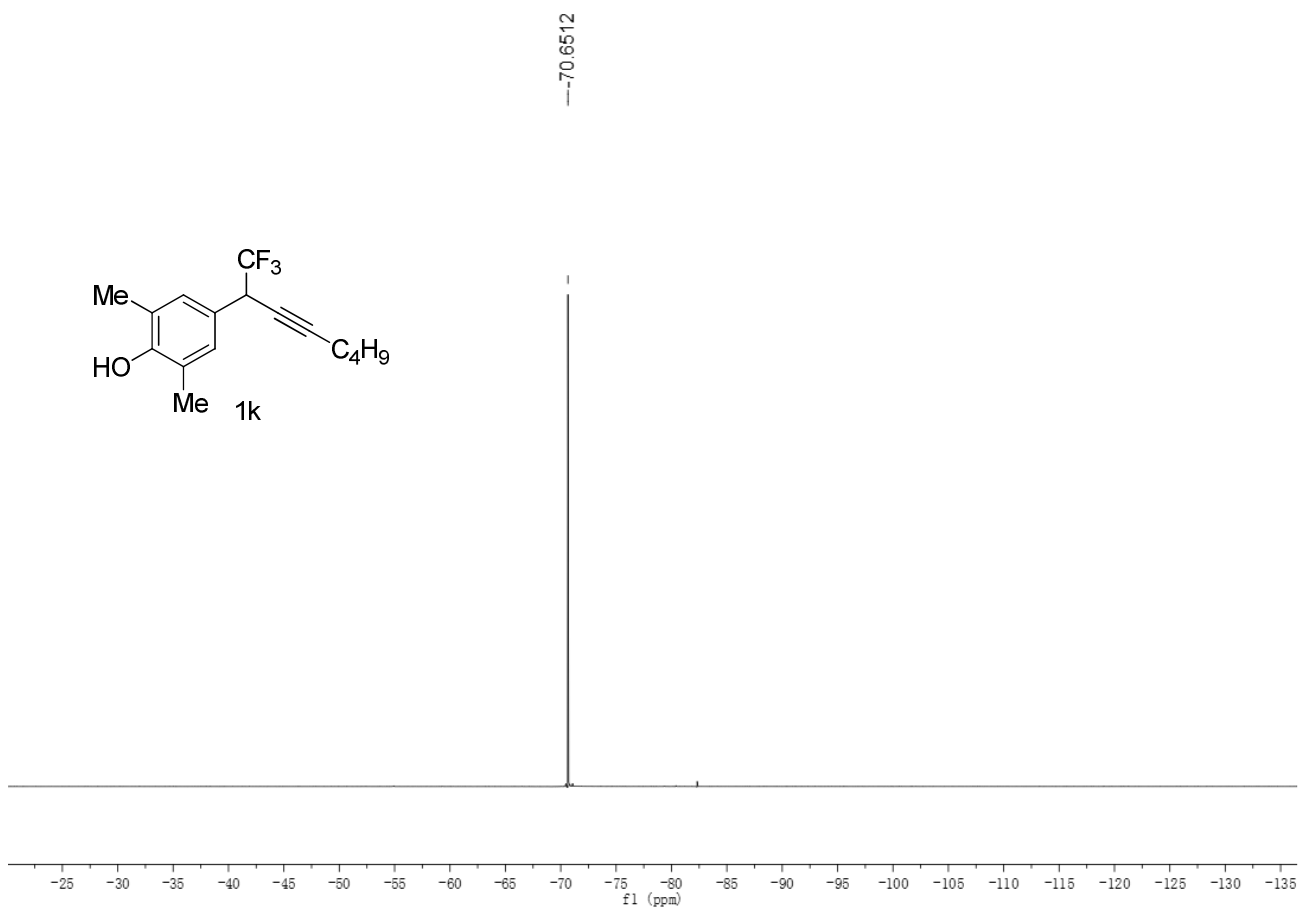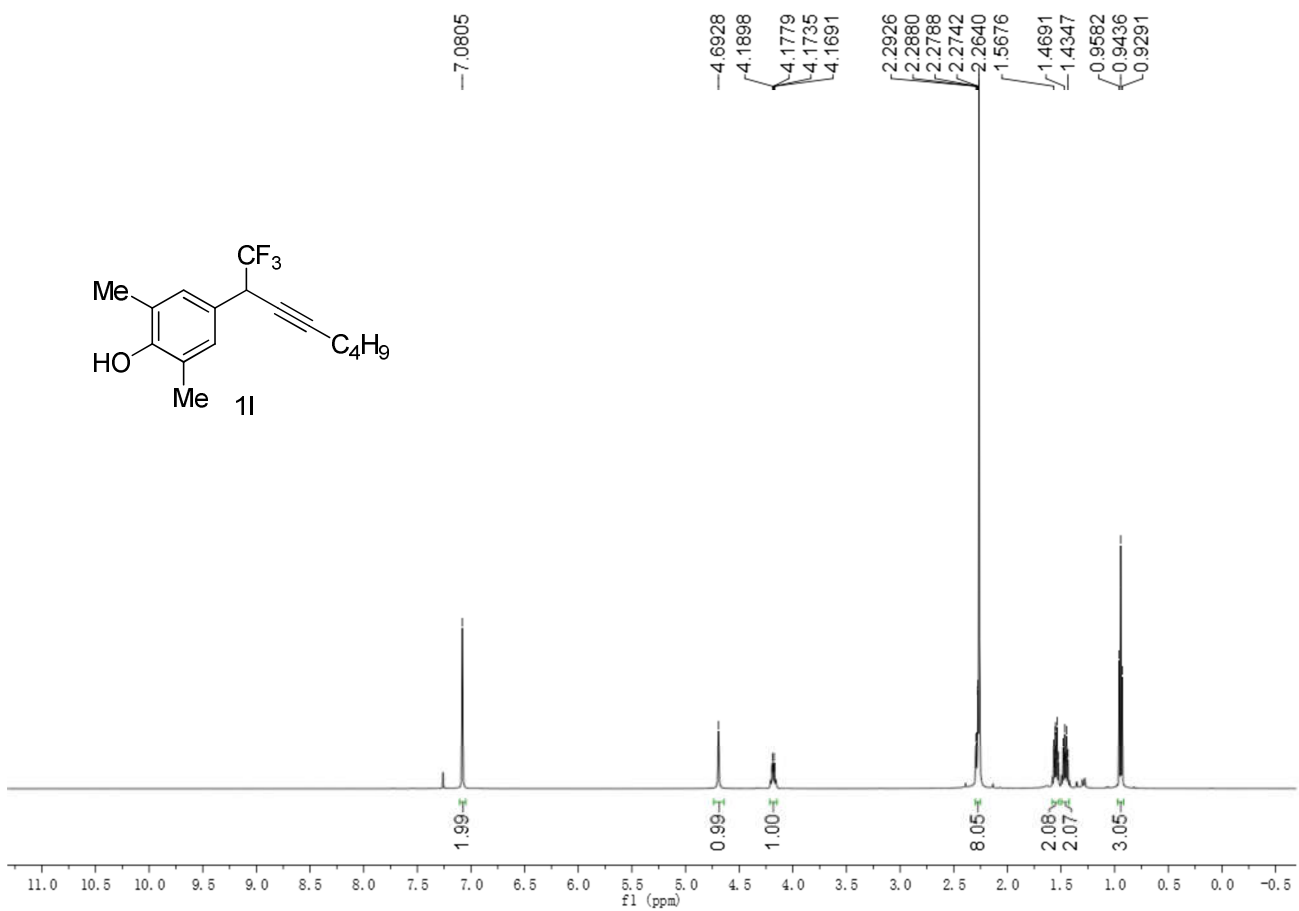

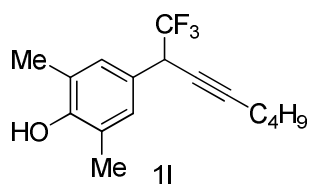

- 152.7010
- 129.6416
- 128.2165
- 125.9881
- 124.1832
- 123.7605
- 123.3381
- 121.5339
- 86.2429
- 73.1971
- 73.1726
- 73.1458
- 73.1189
- 43.3235
- 43.0759
- 42.8282
- 42.5806
- 30.7604
- 22.0731
- 18.5941
- 16.0785
- 13.7479

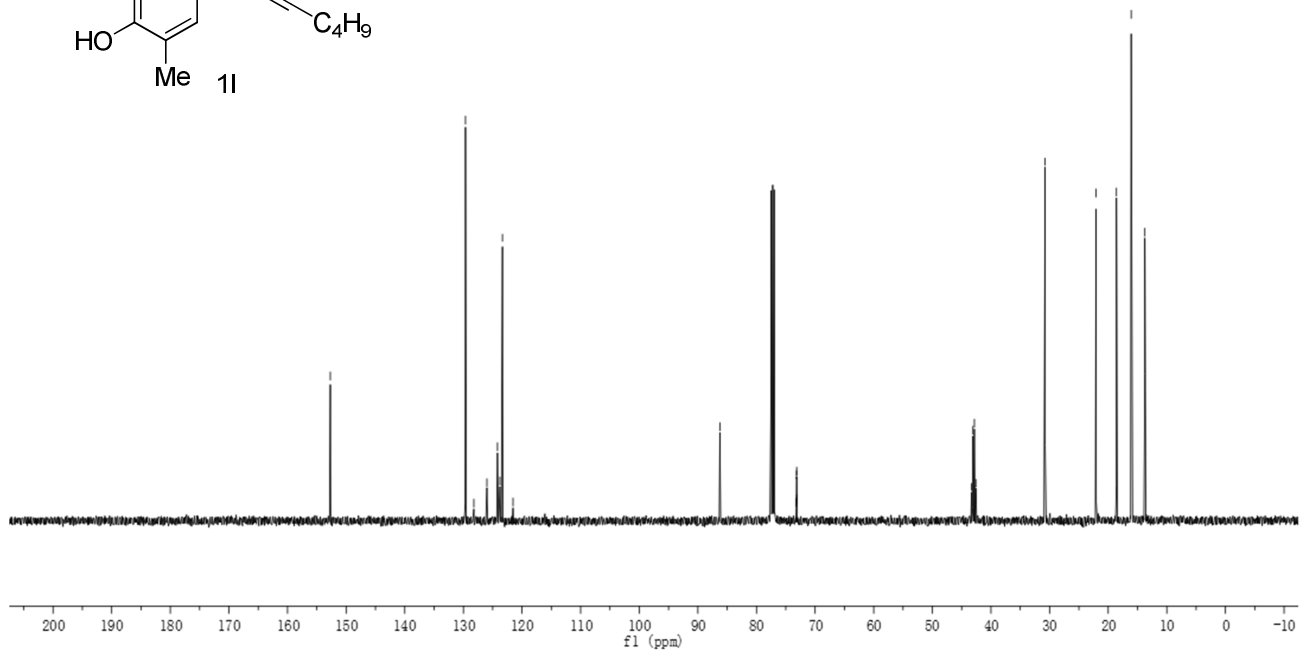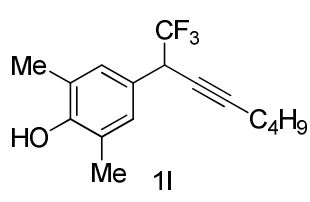

71.1381

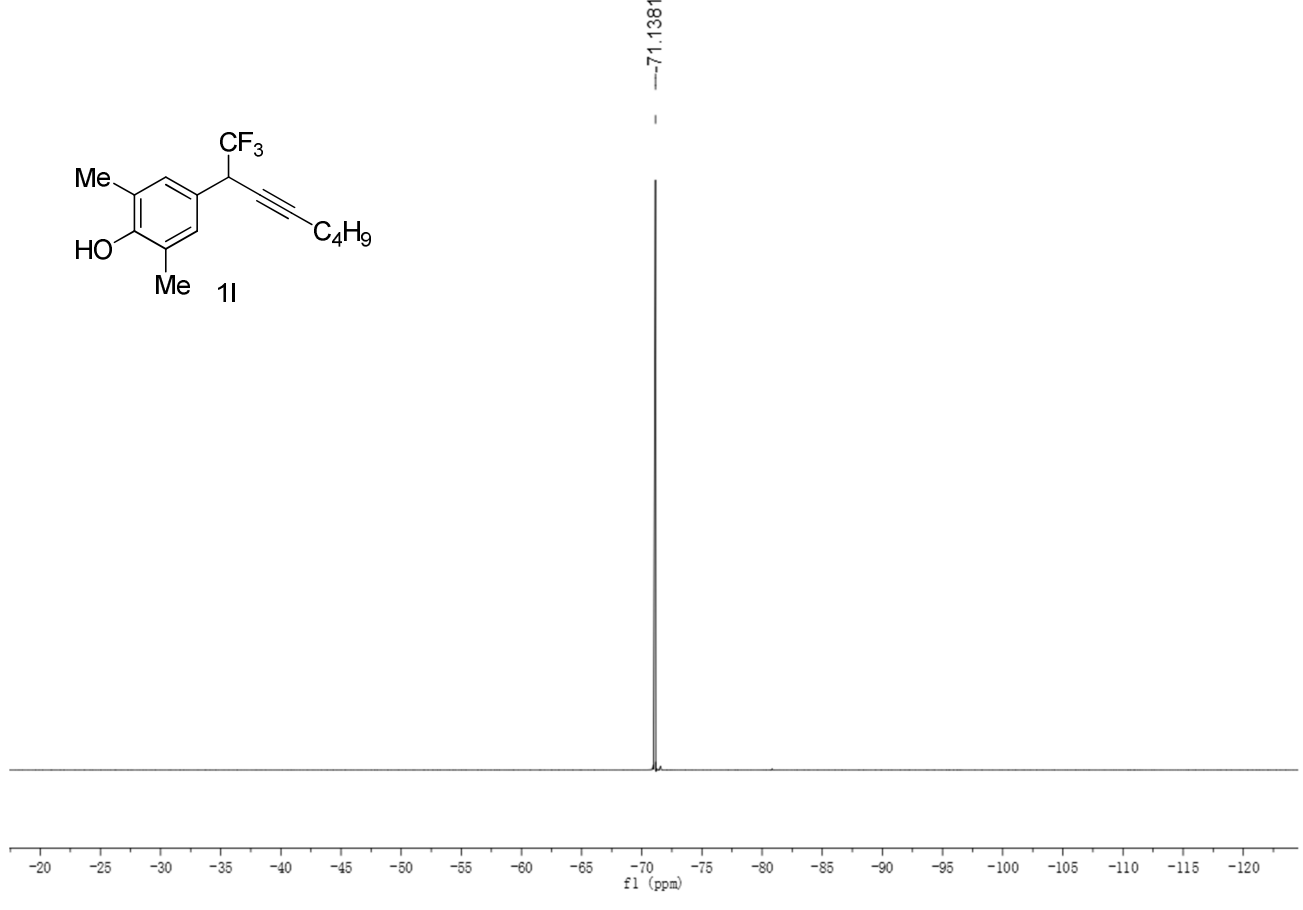

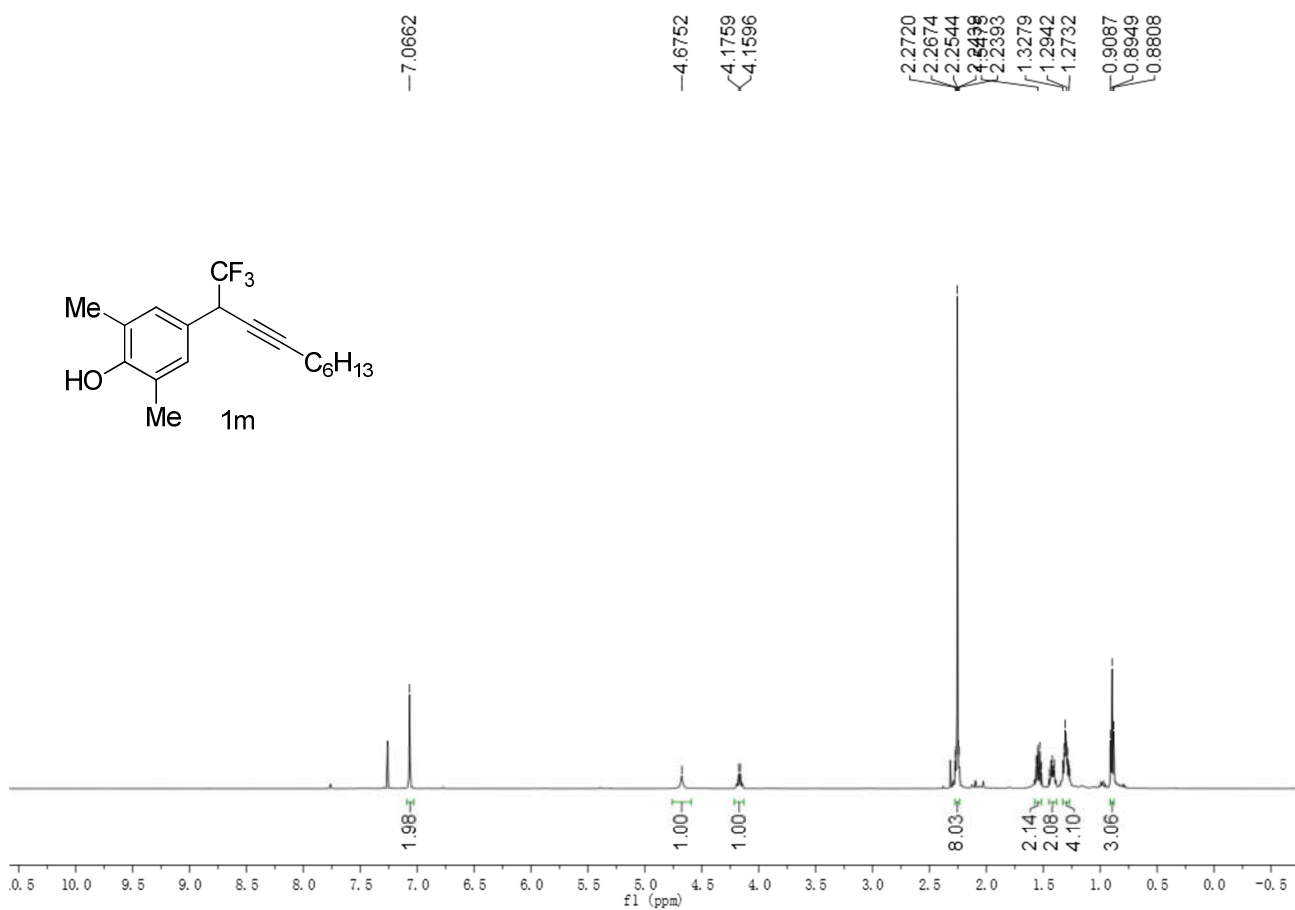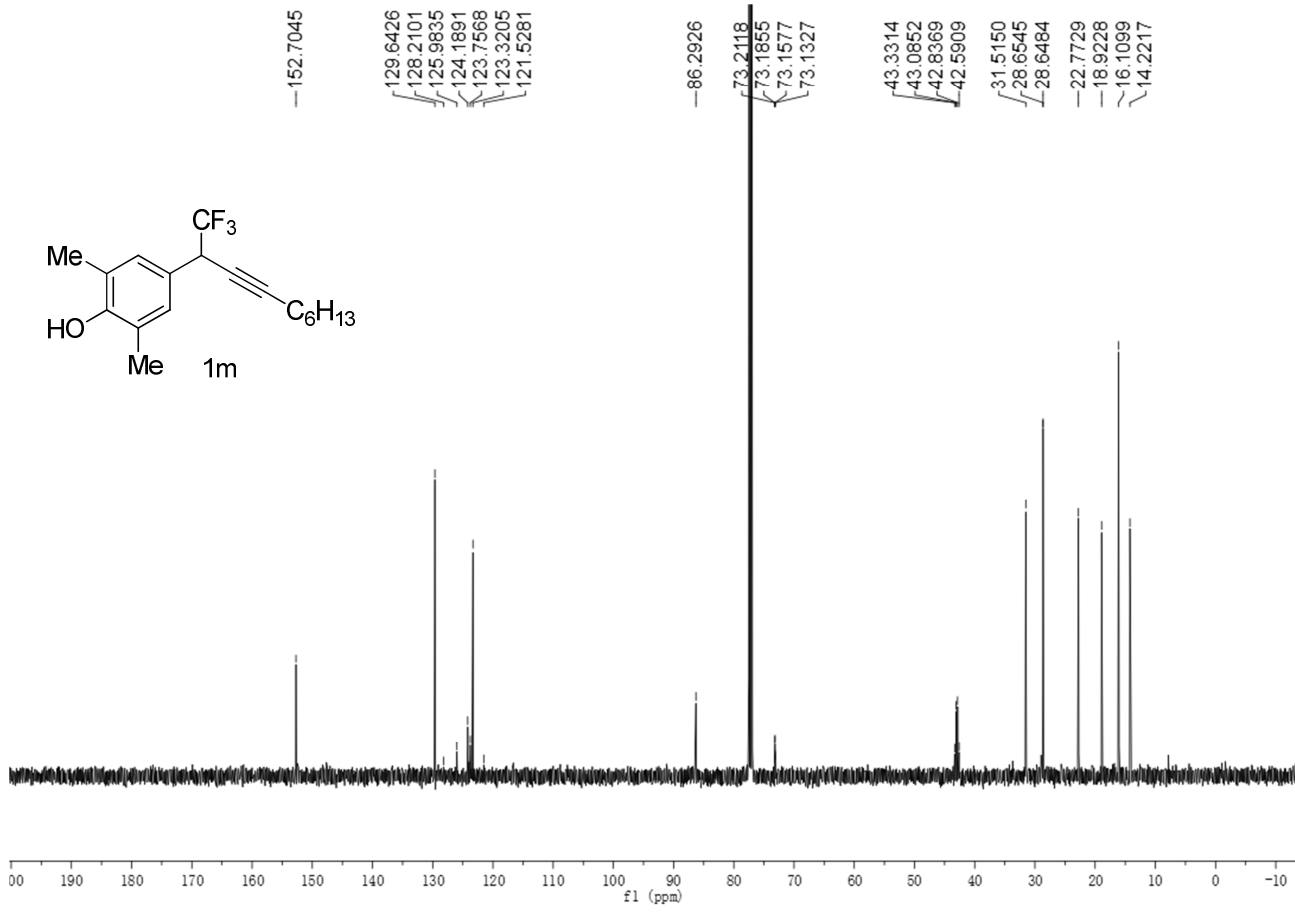

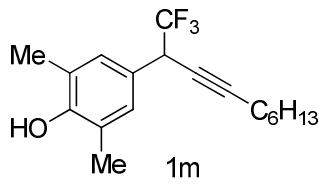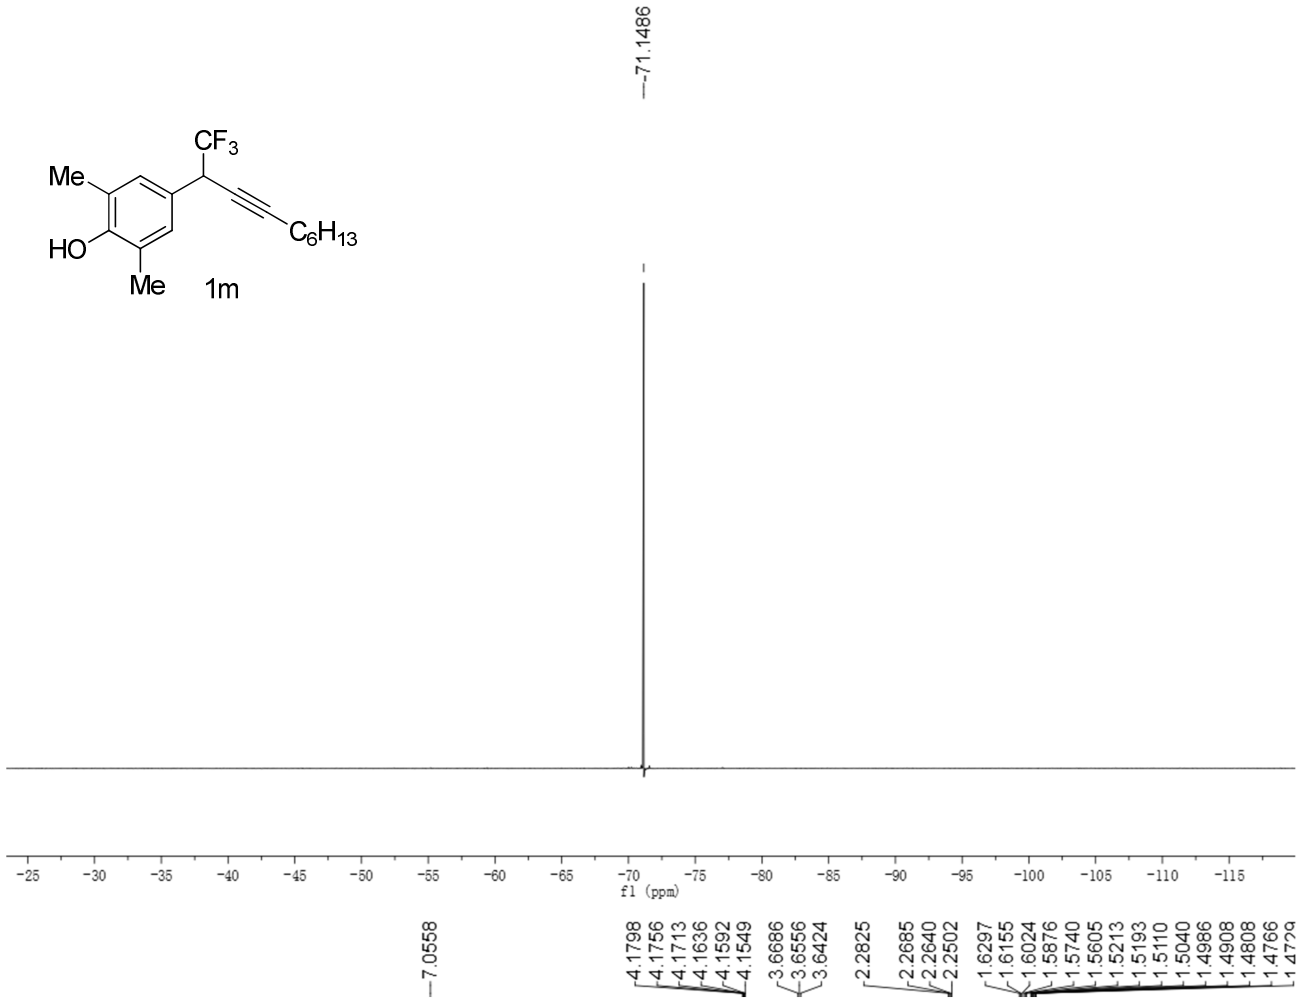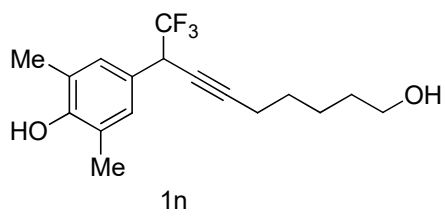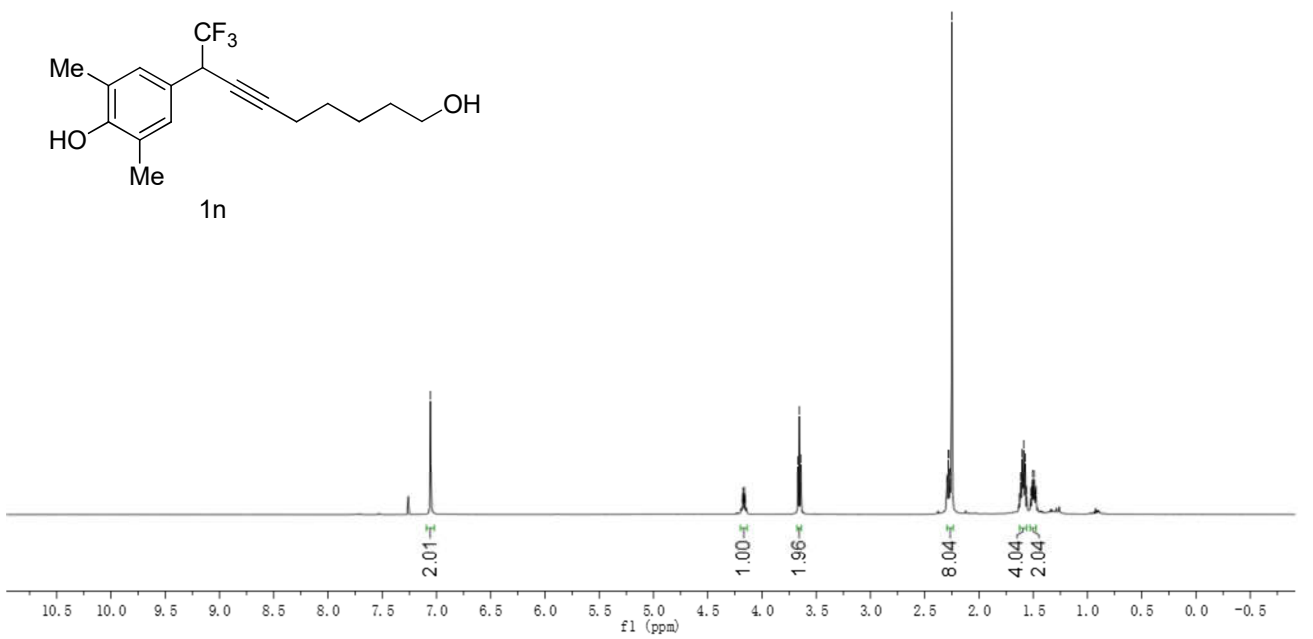

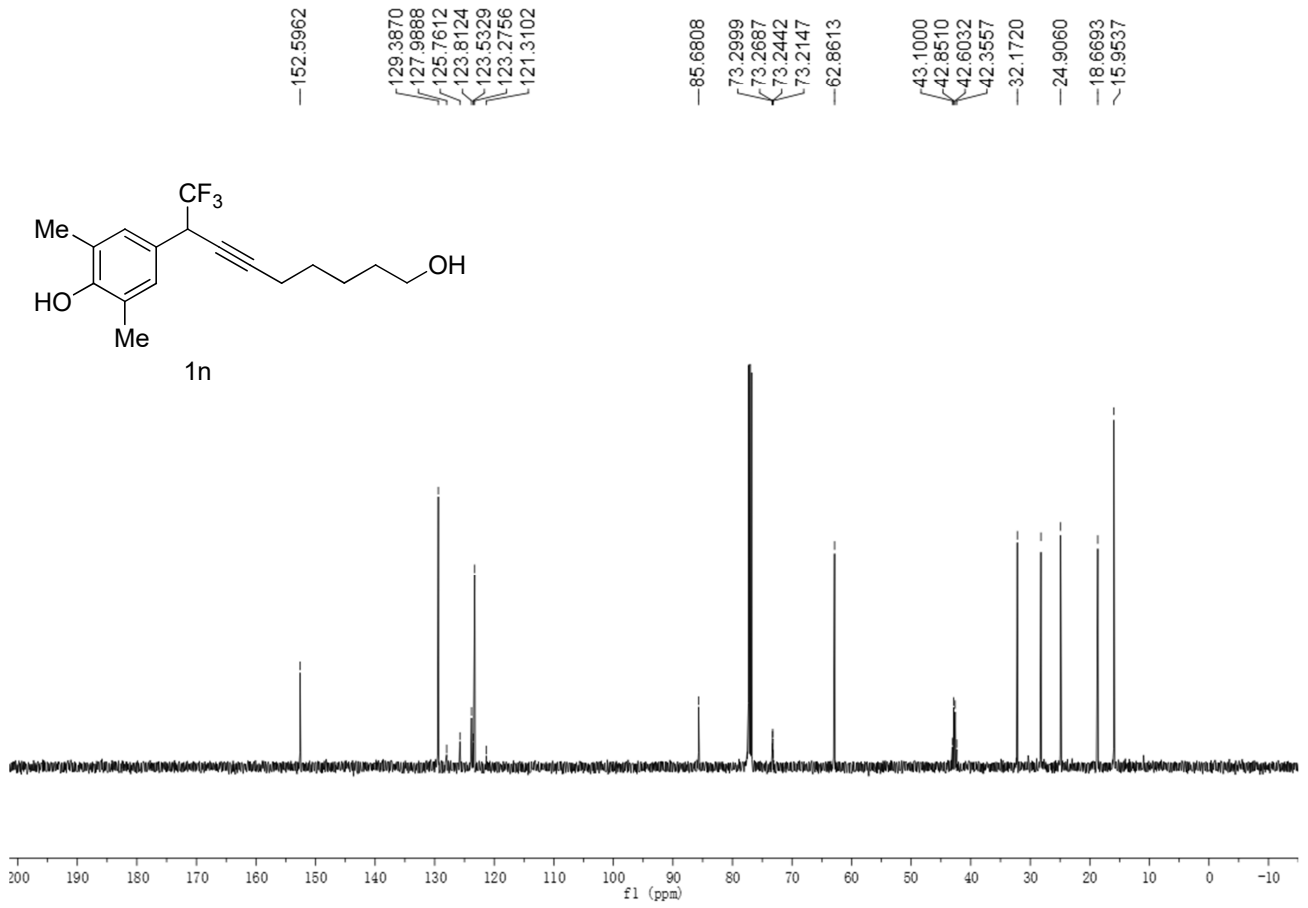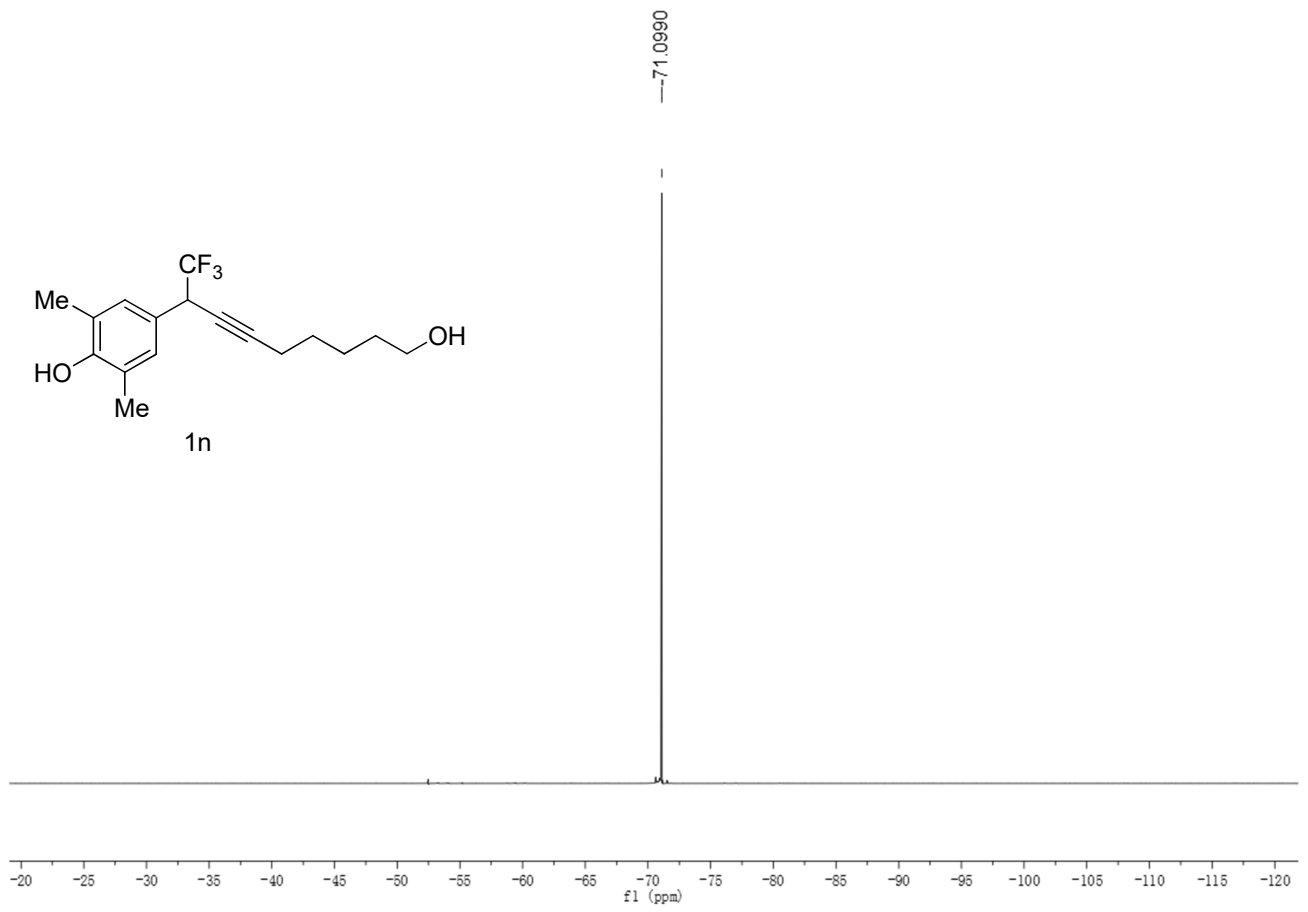



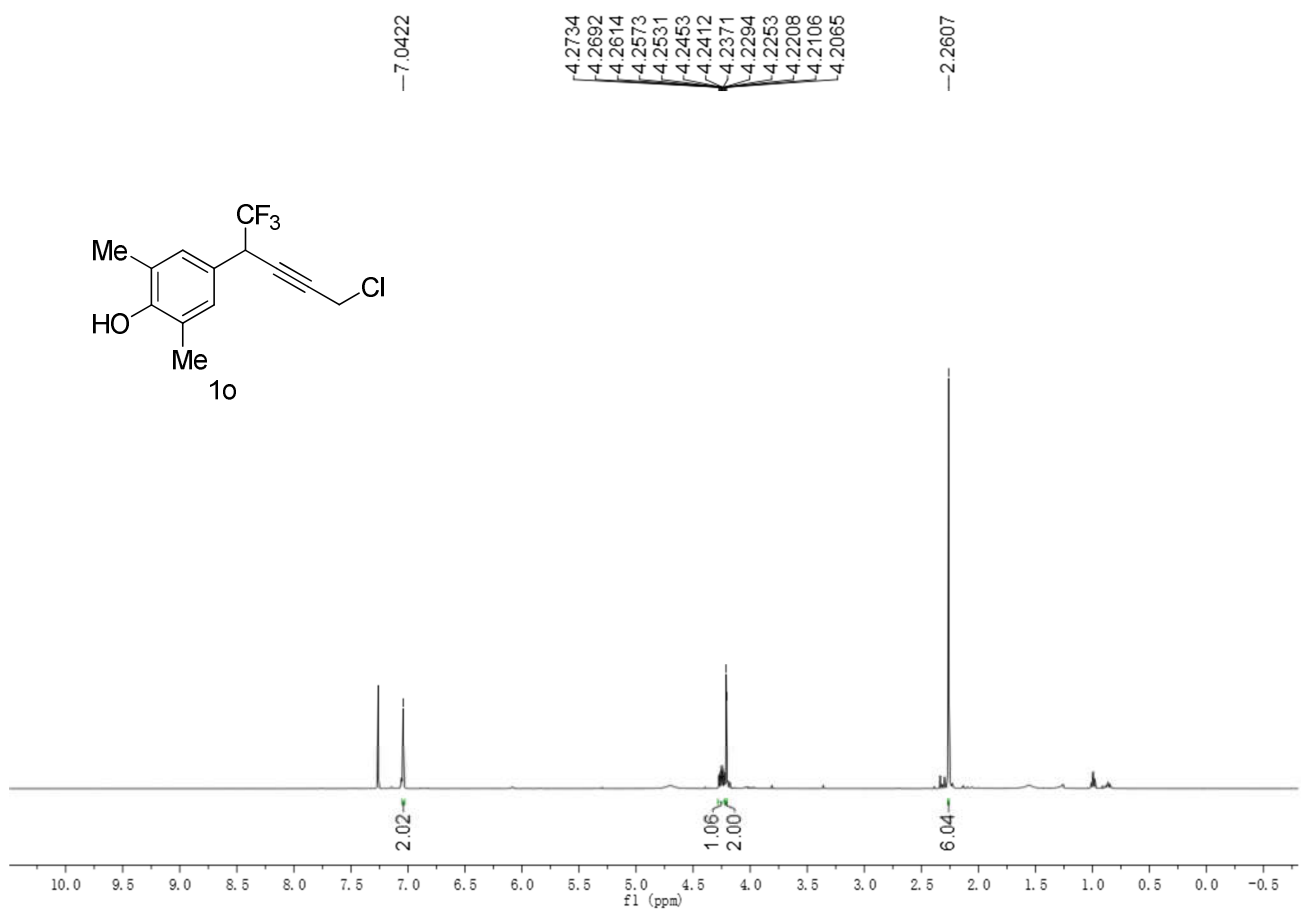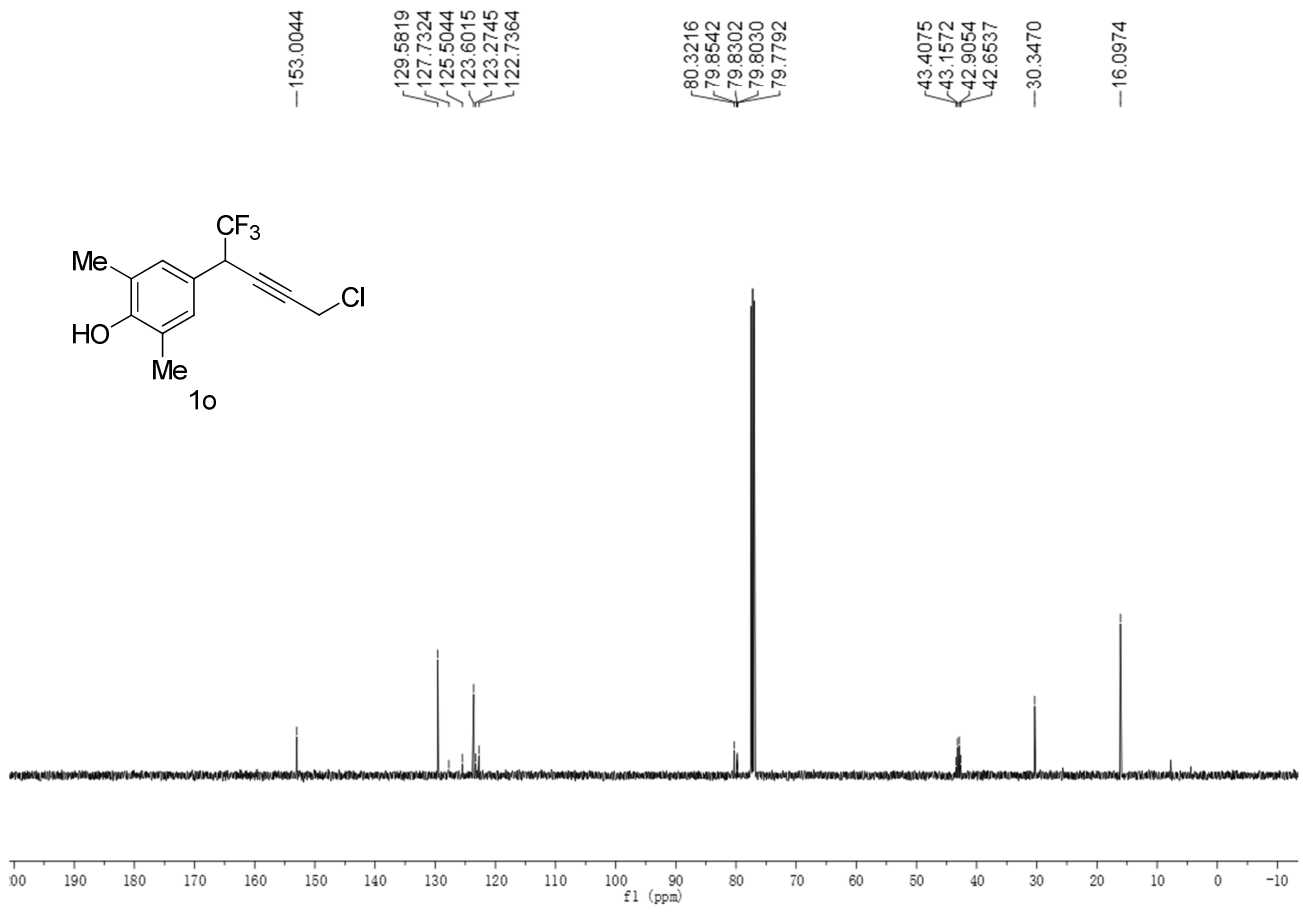

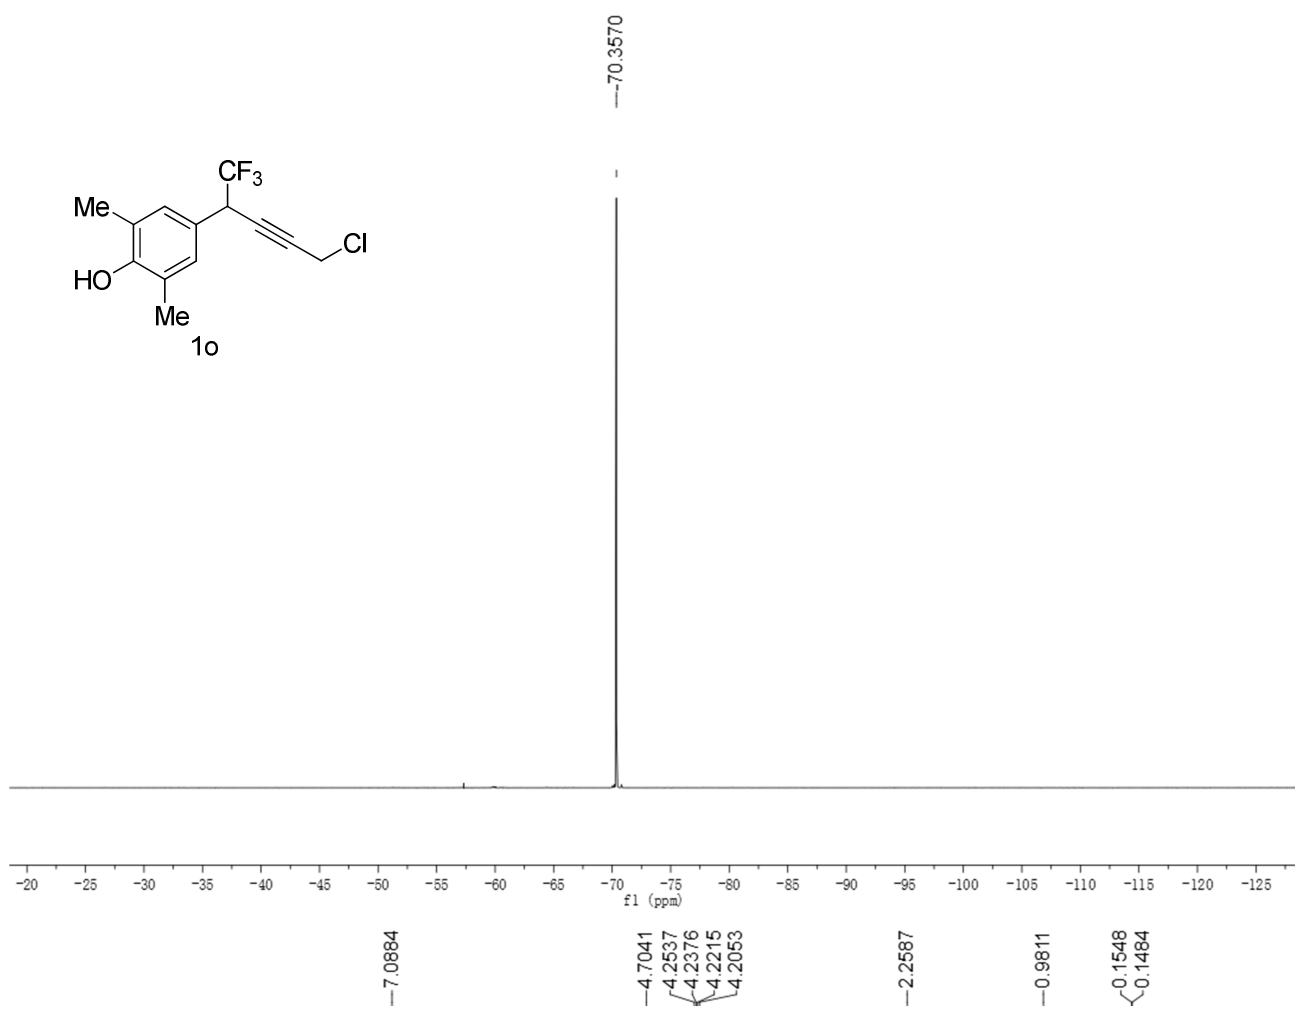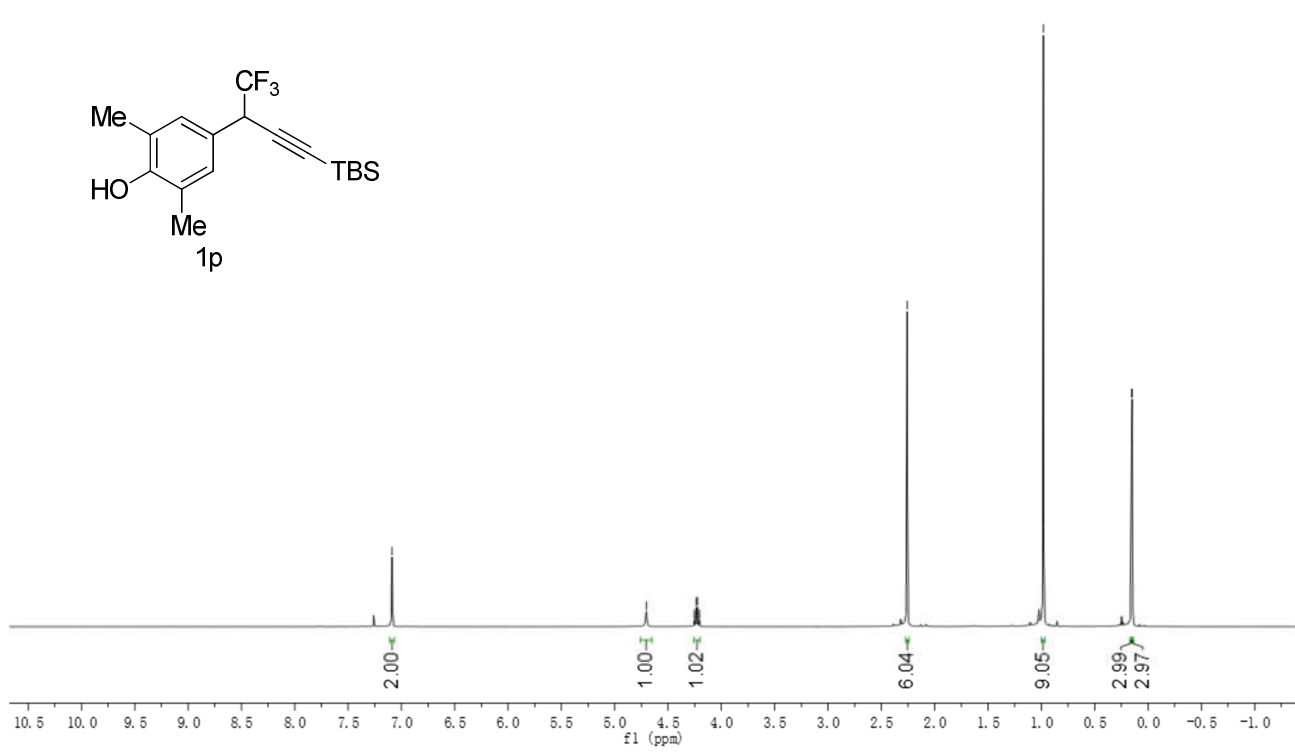

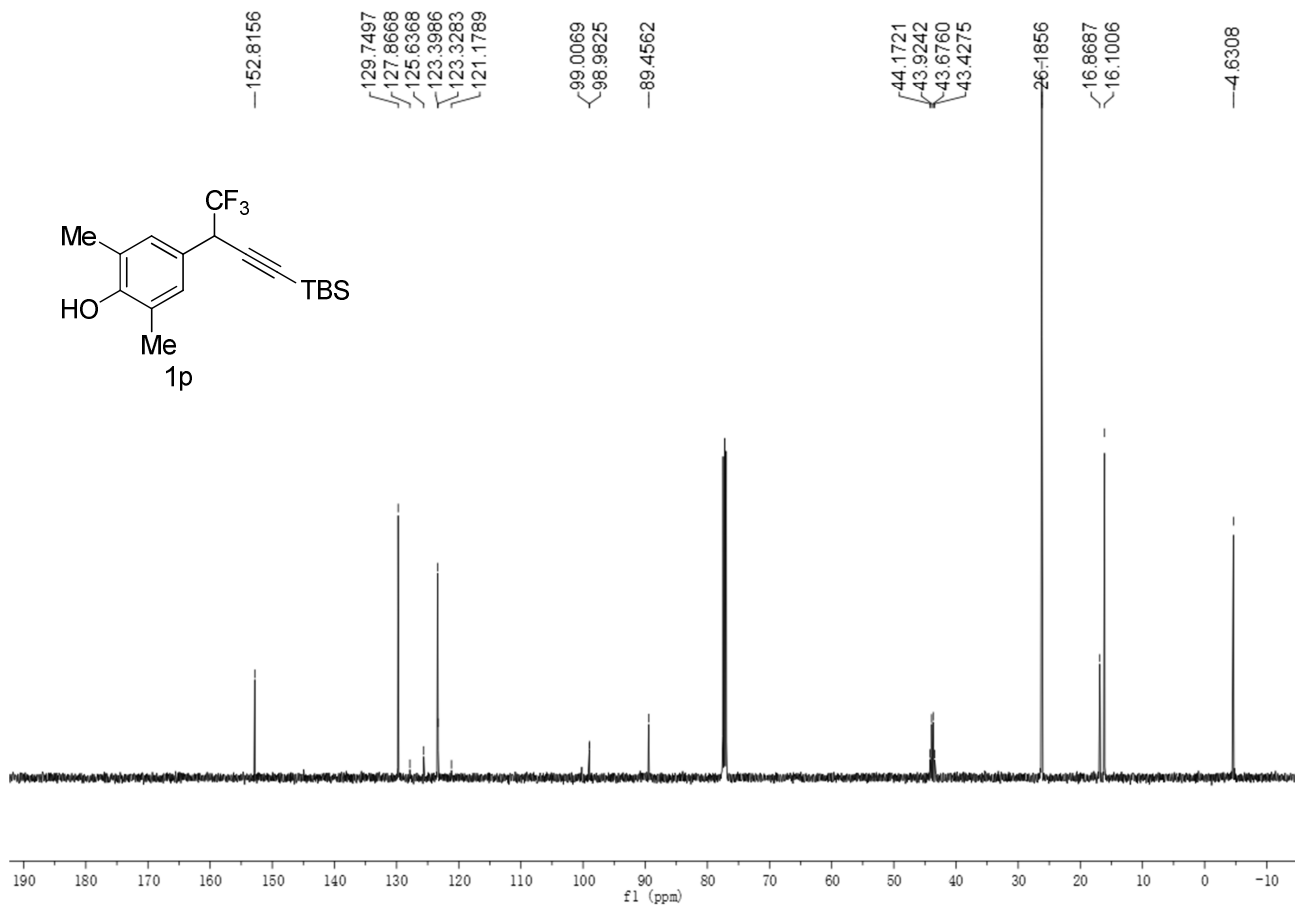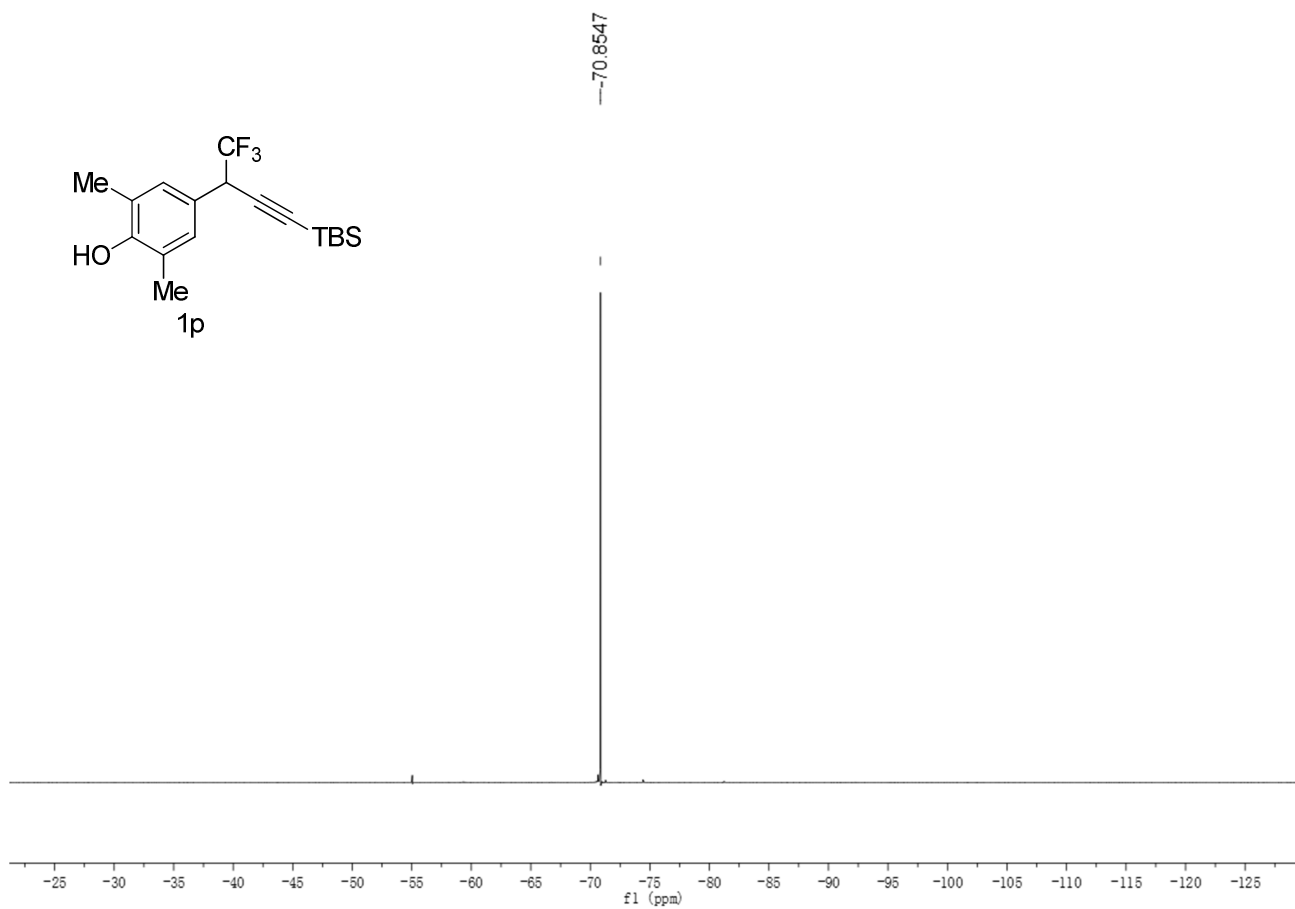

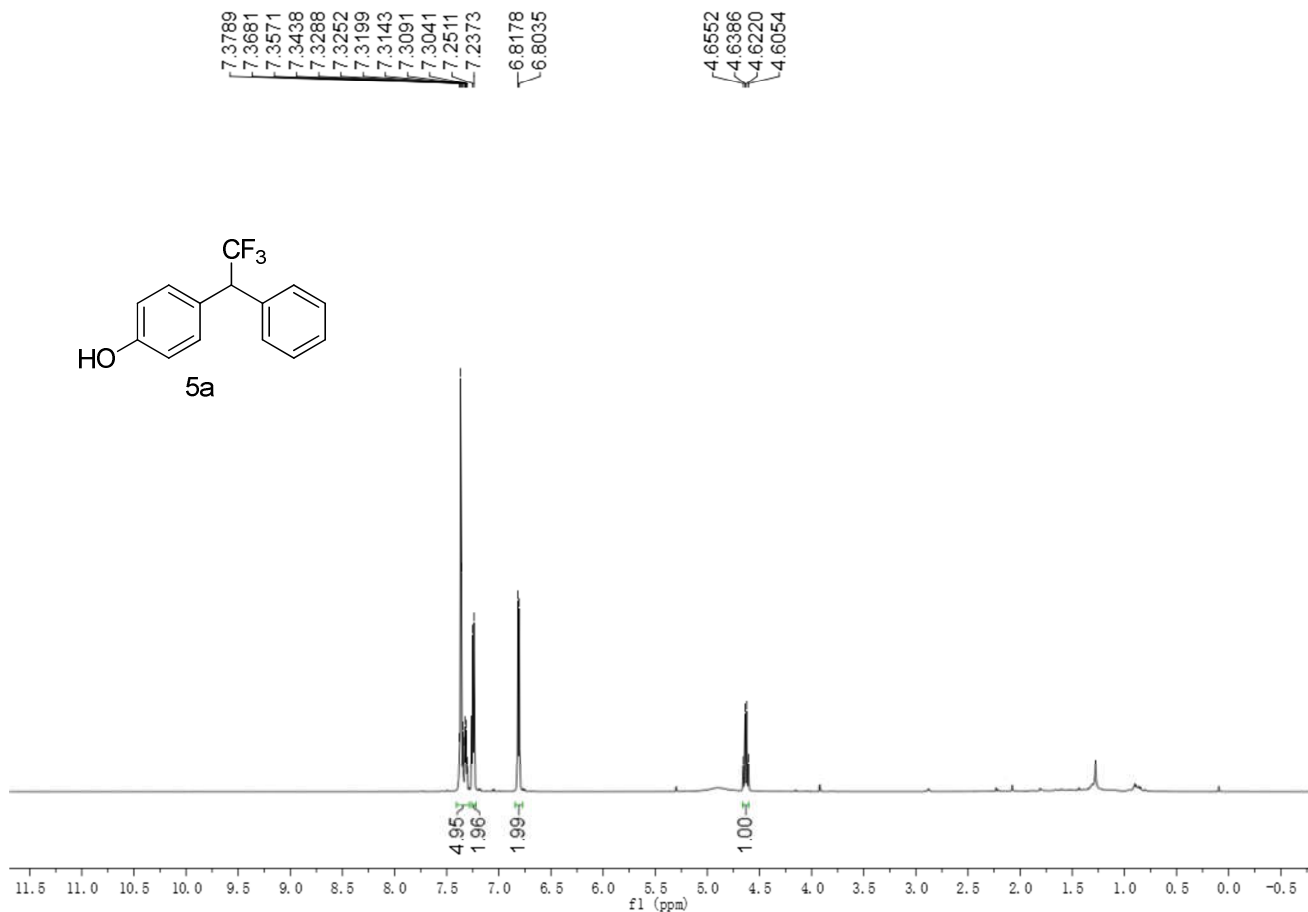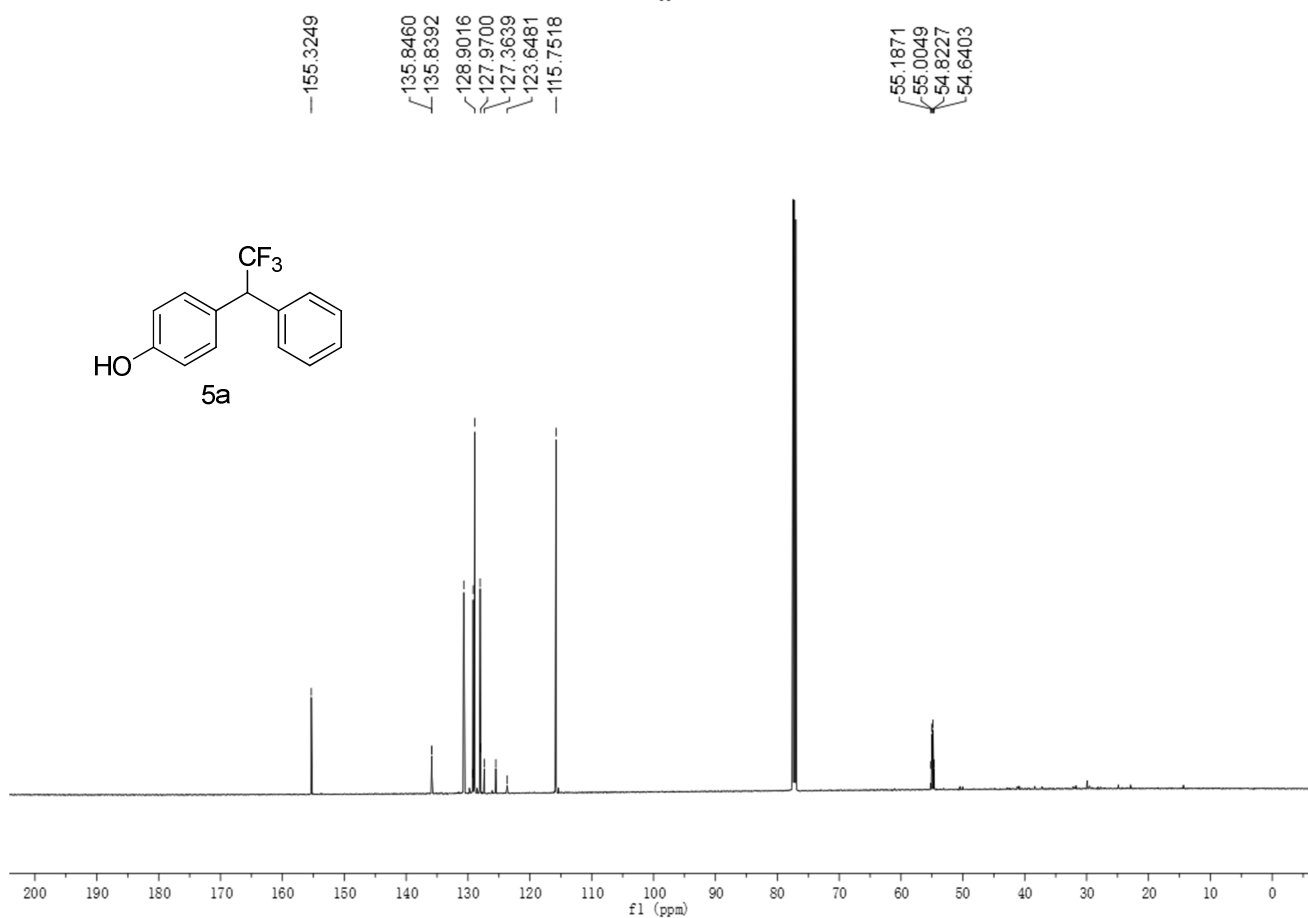

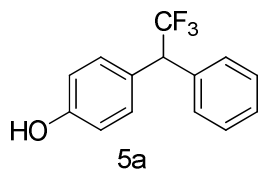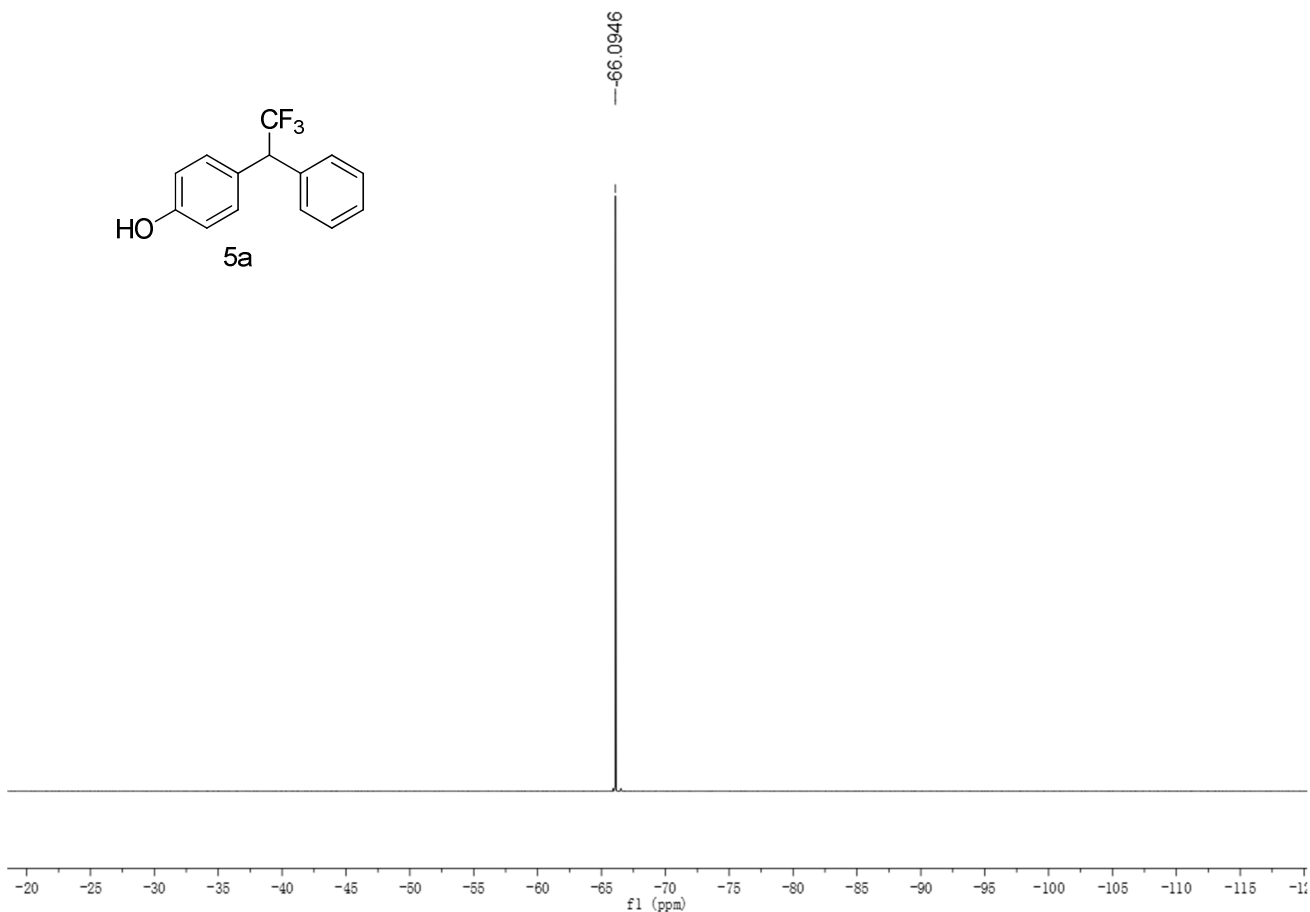

7.2817  
 7.2643  
 7.2002  
 7.1831  
 6.8620  
 6.8444  
 6.7735  
 6.7562  
 4.6963  
 4.6755  
 4.6547  
 4.6339  
 -3.7187

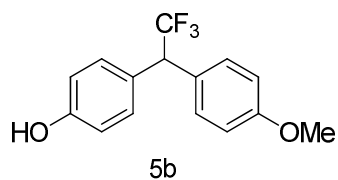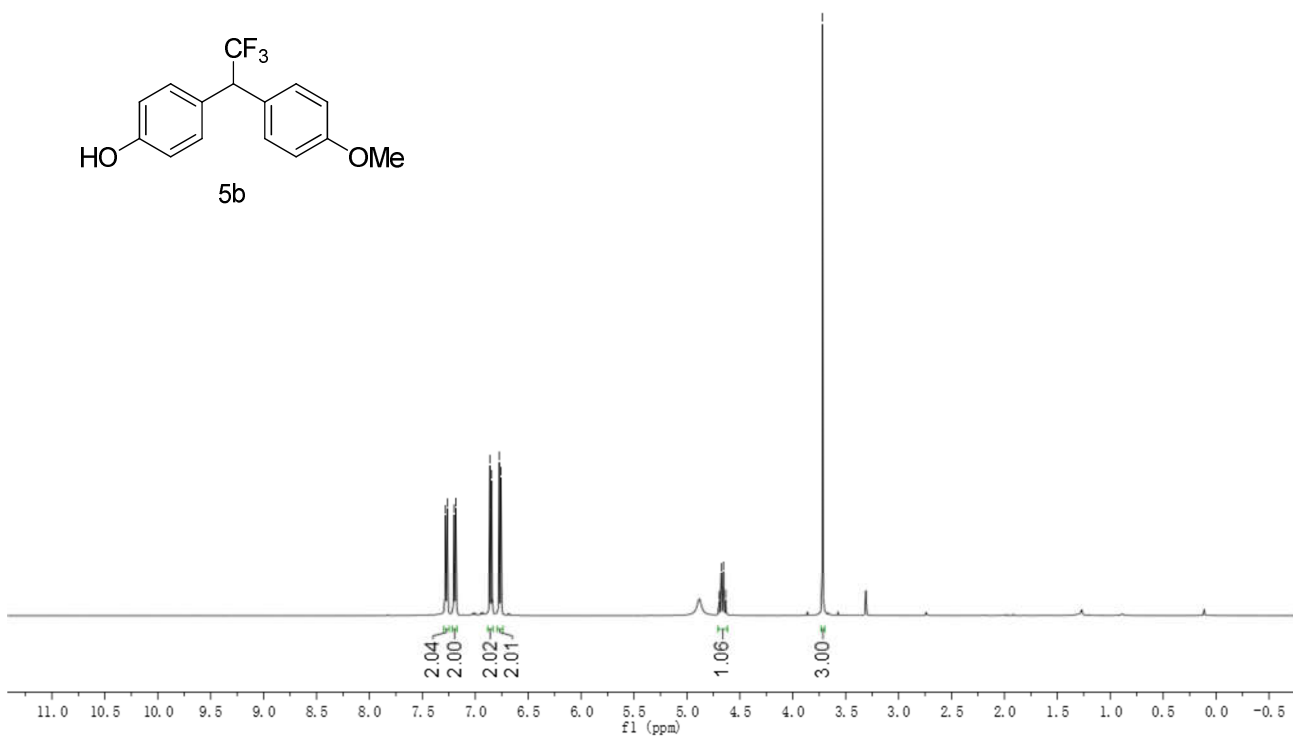

2.04  
 2.00  
 2.02  
 2.01  
 1.06  
 3.00

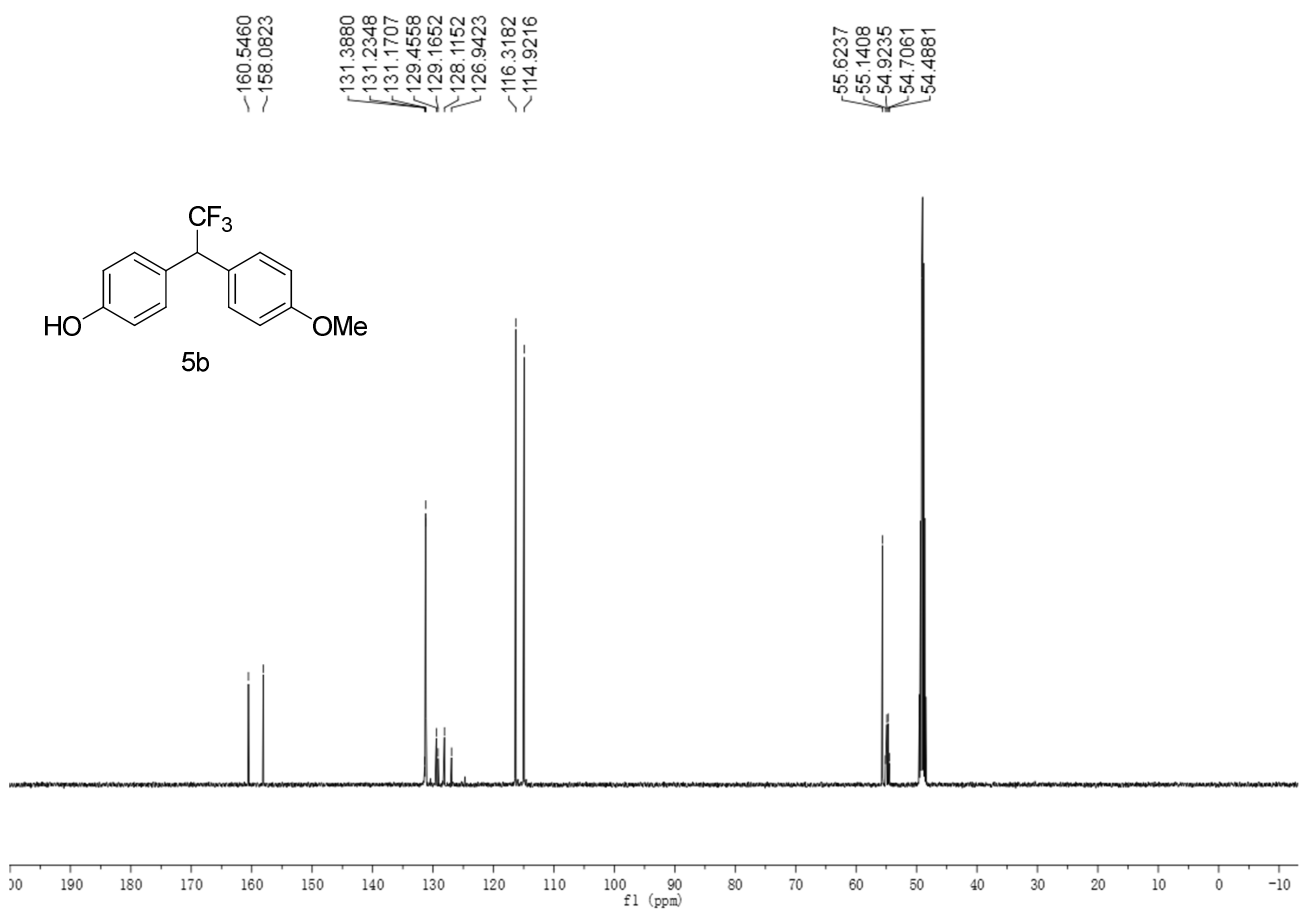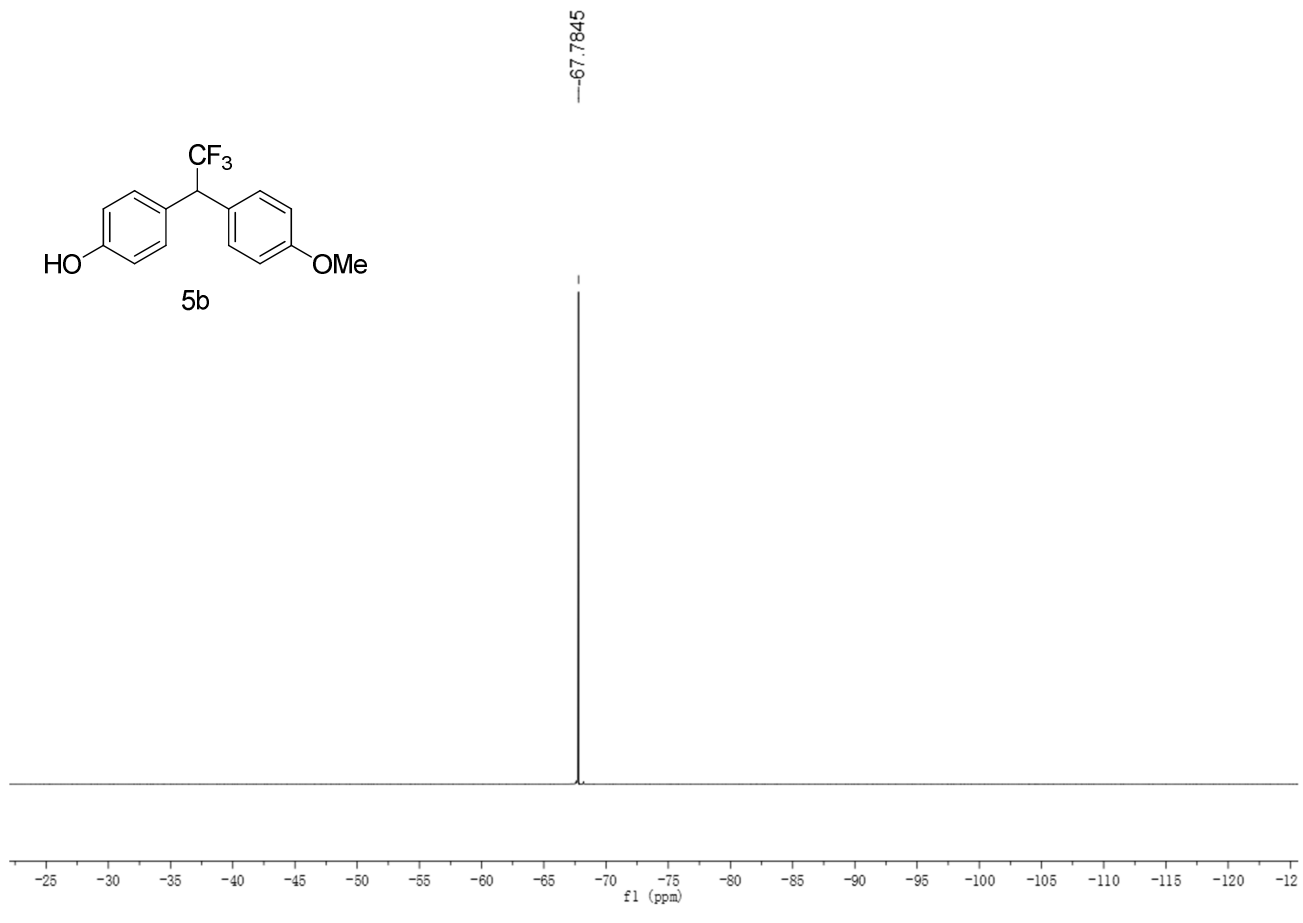

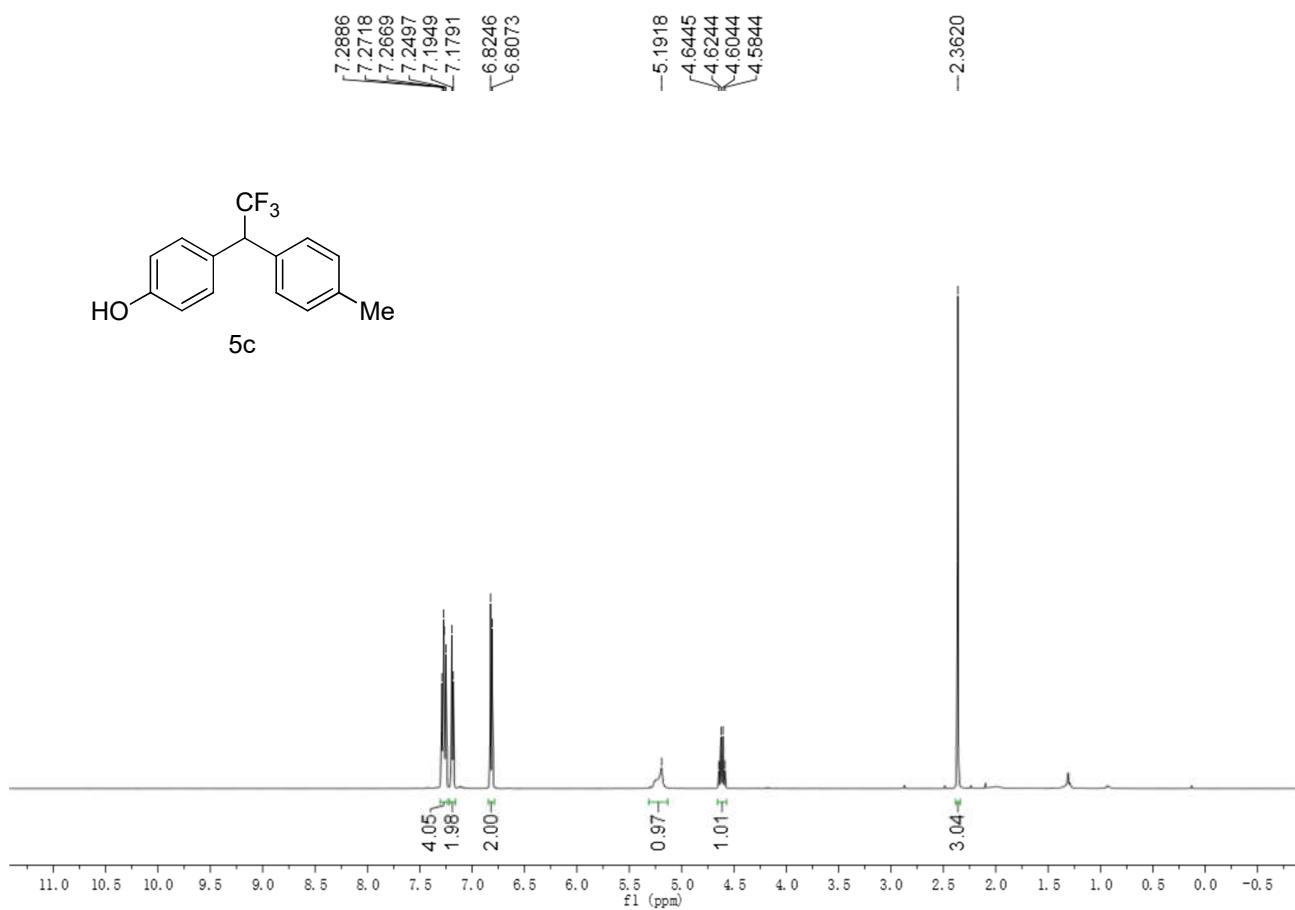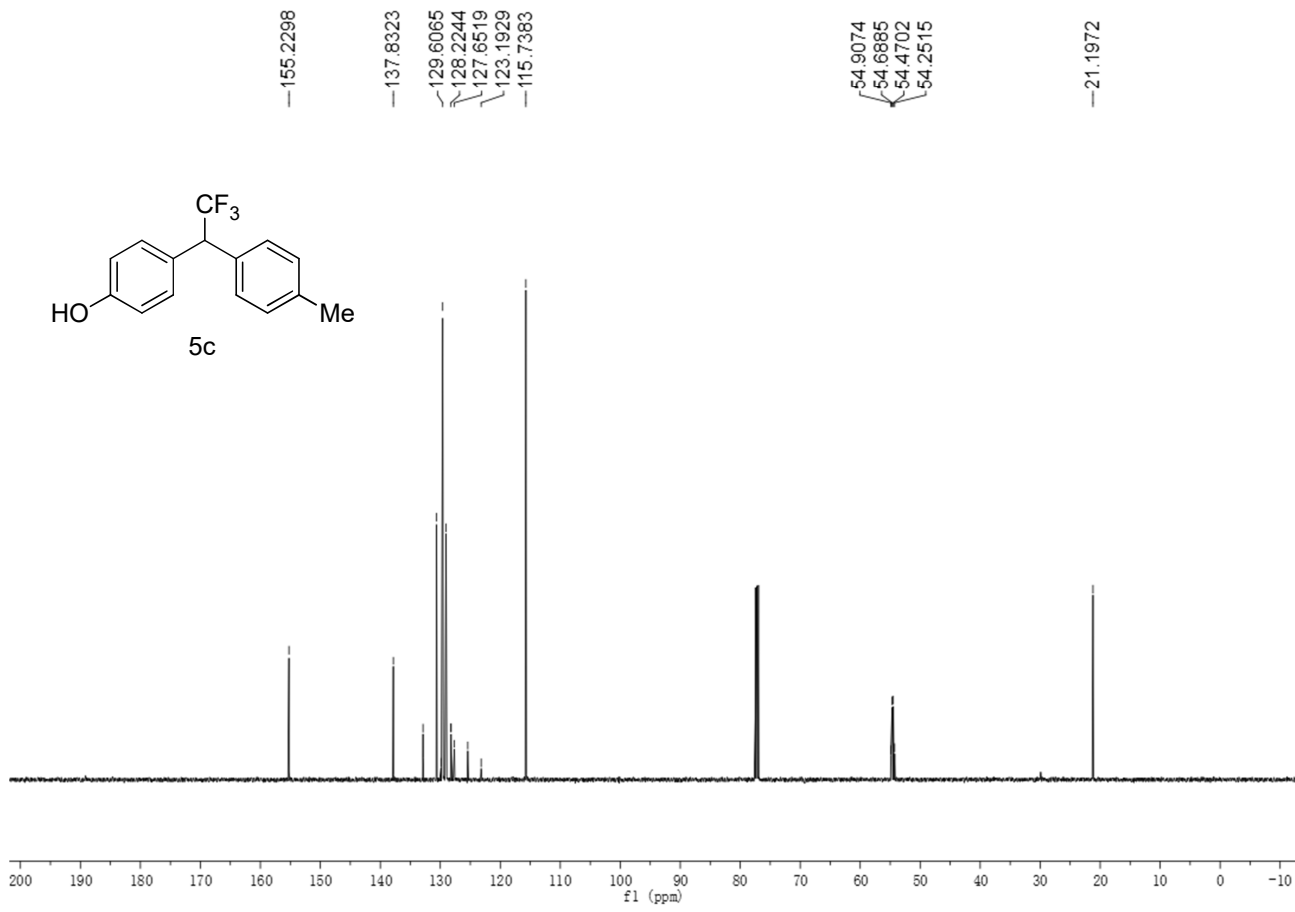

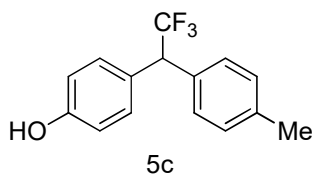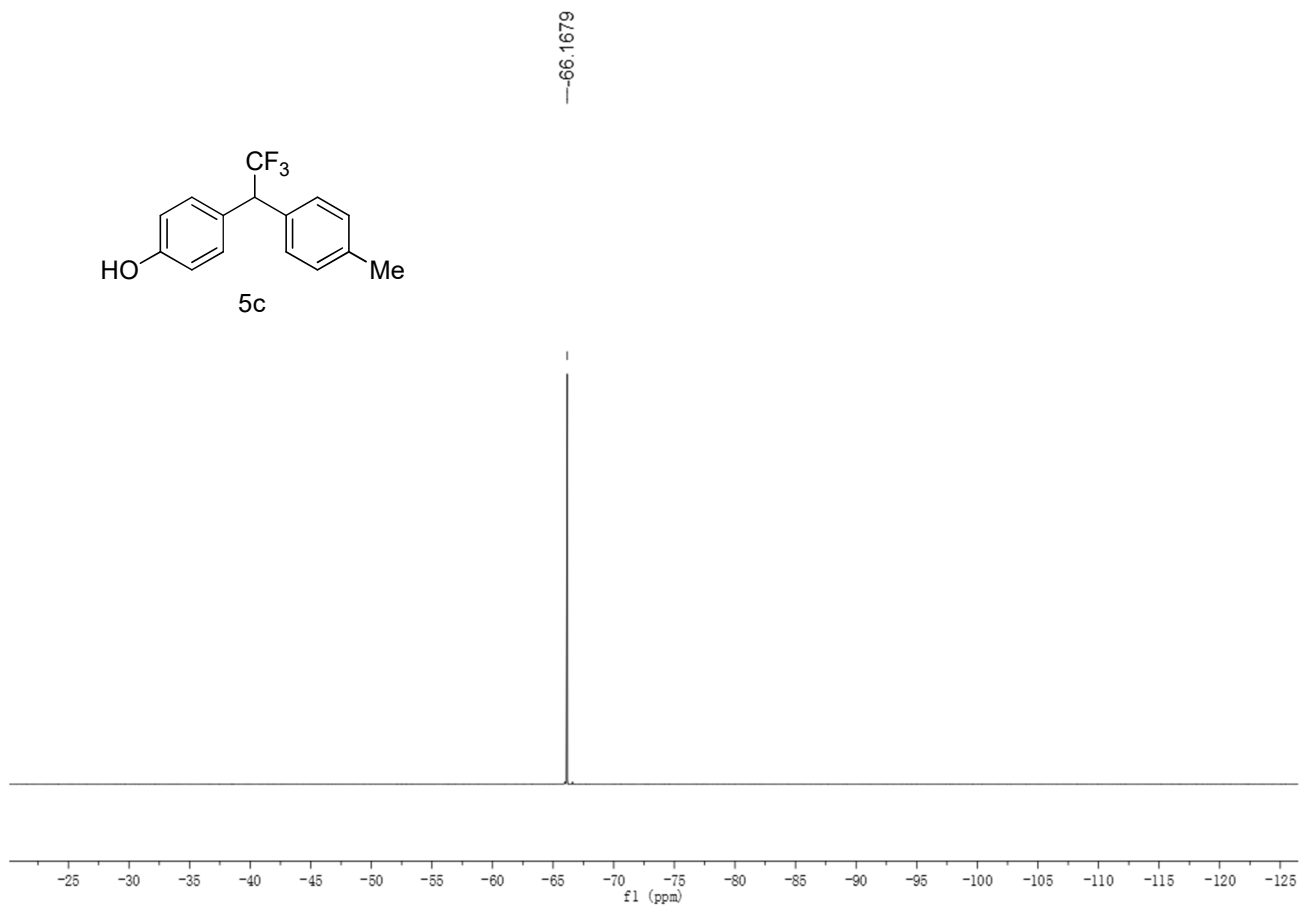

7.3355  
7.3312  
7.3226  
7.3180  
7.3139  
7.2962  
7.2790  
7.2118  
7.1946  
6.8252  
6.8078  
5.0829  
4.6301  
4.6105  
4.5909  
4.5712

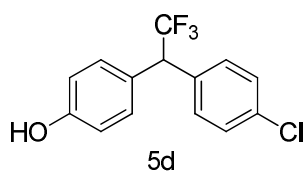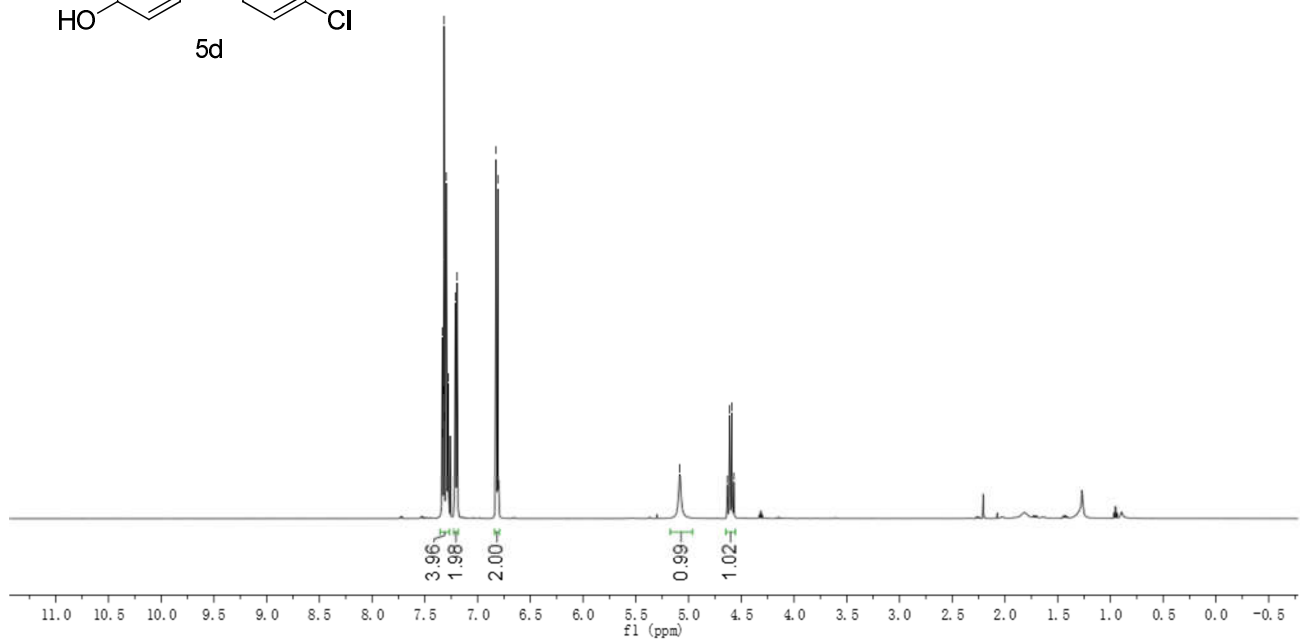



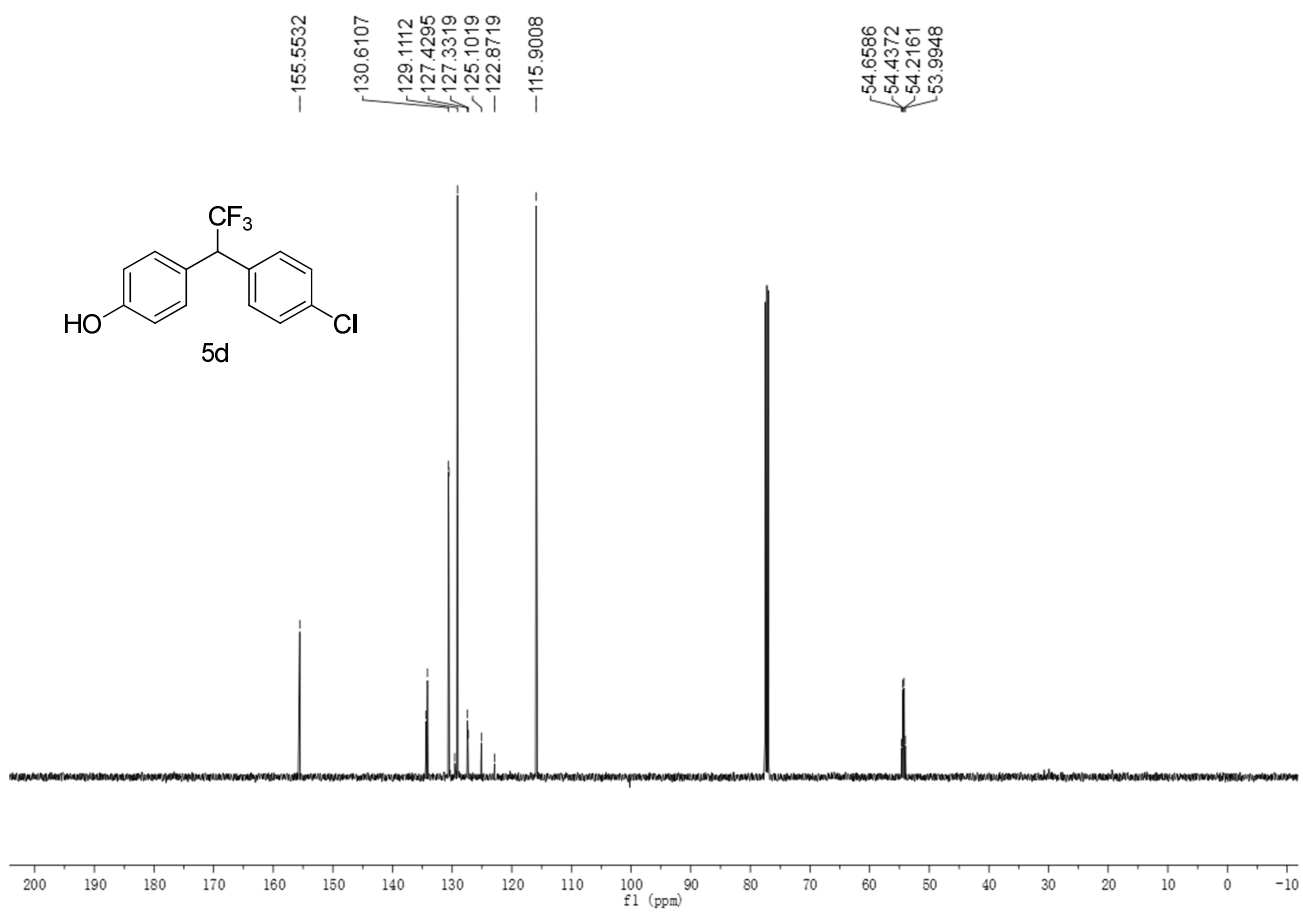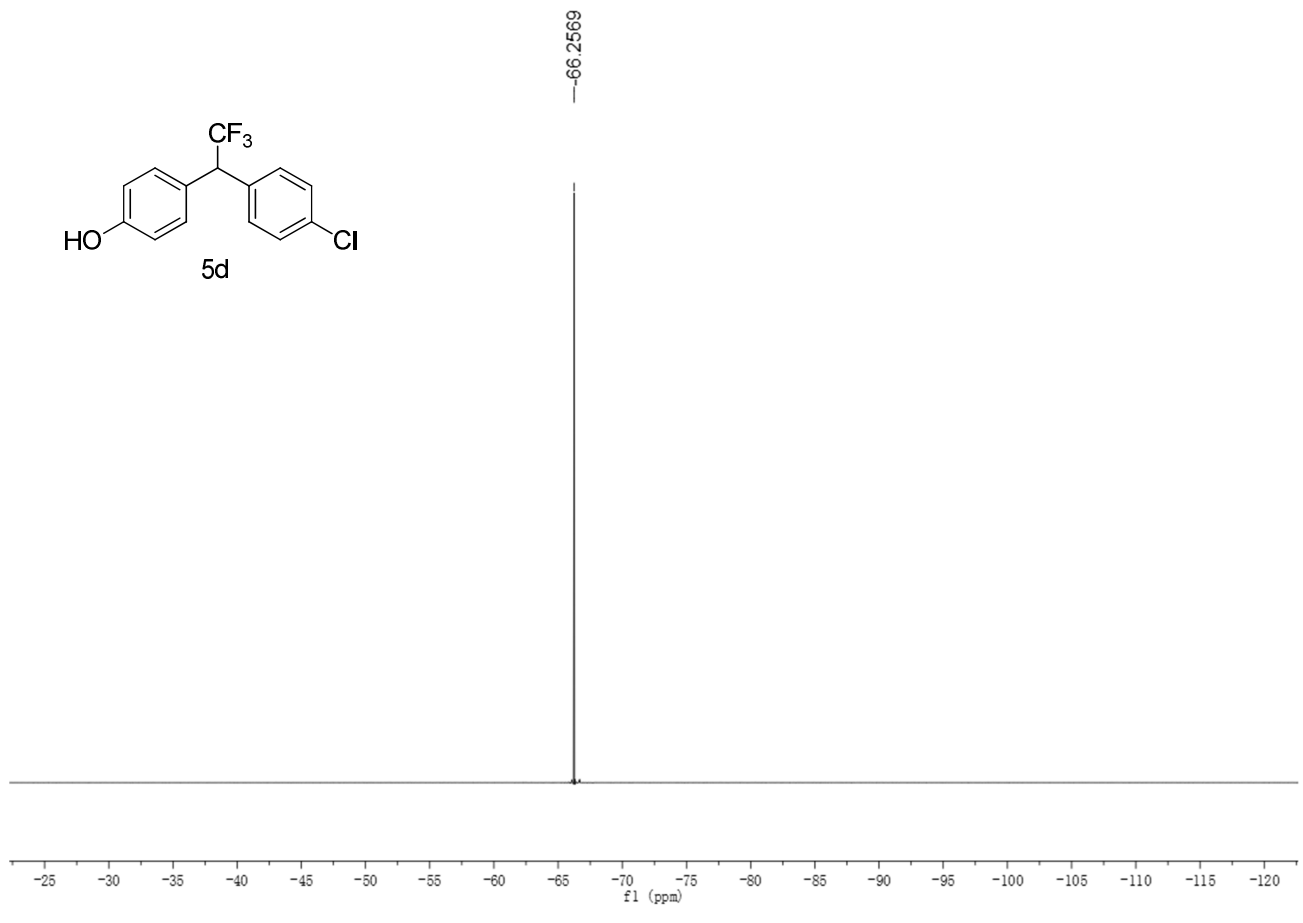

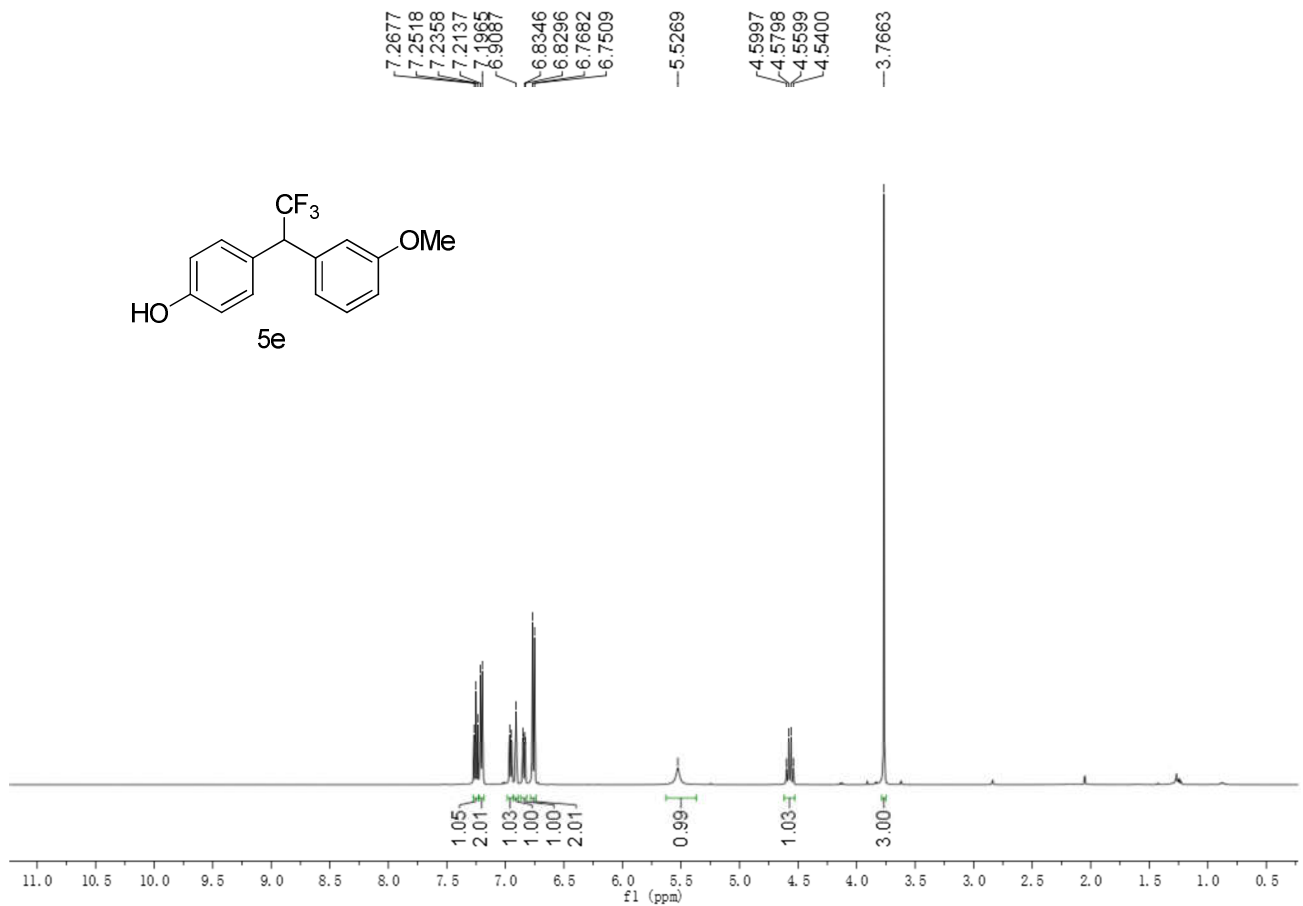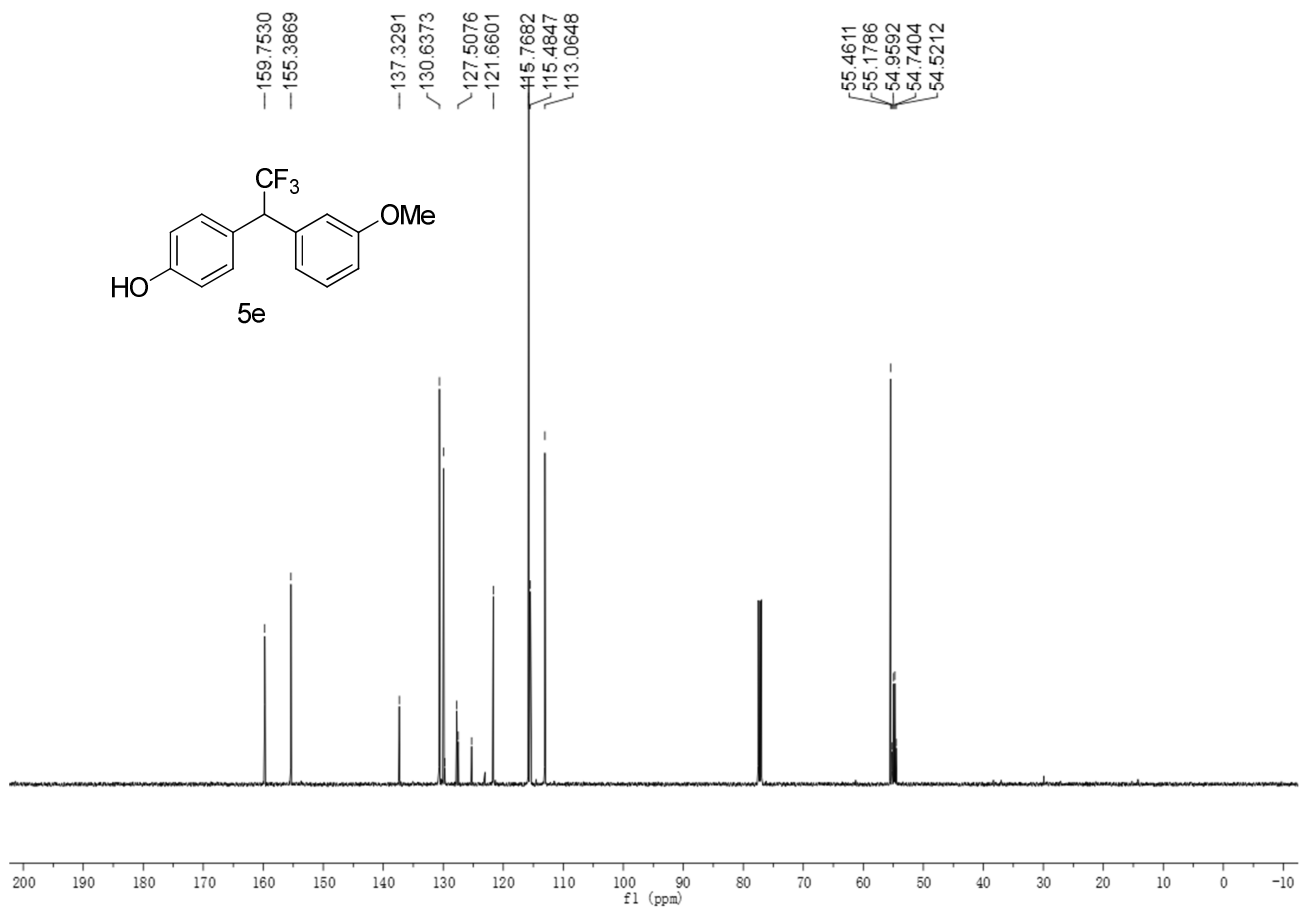

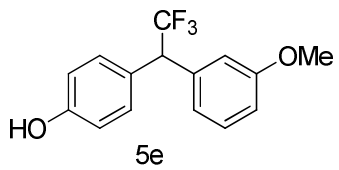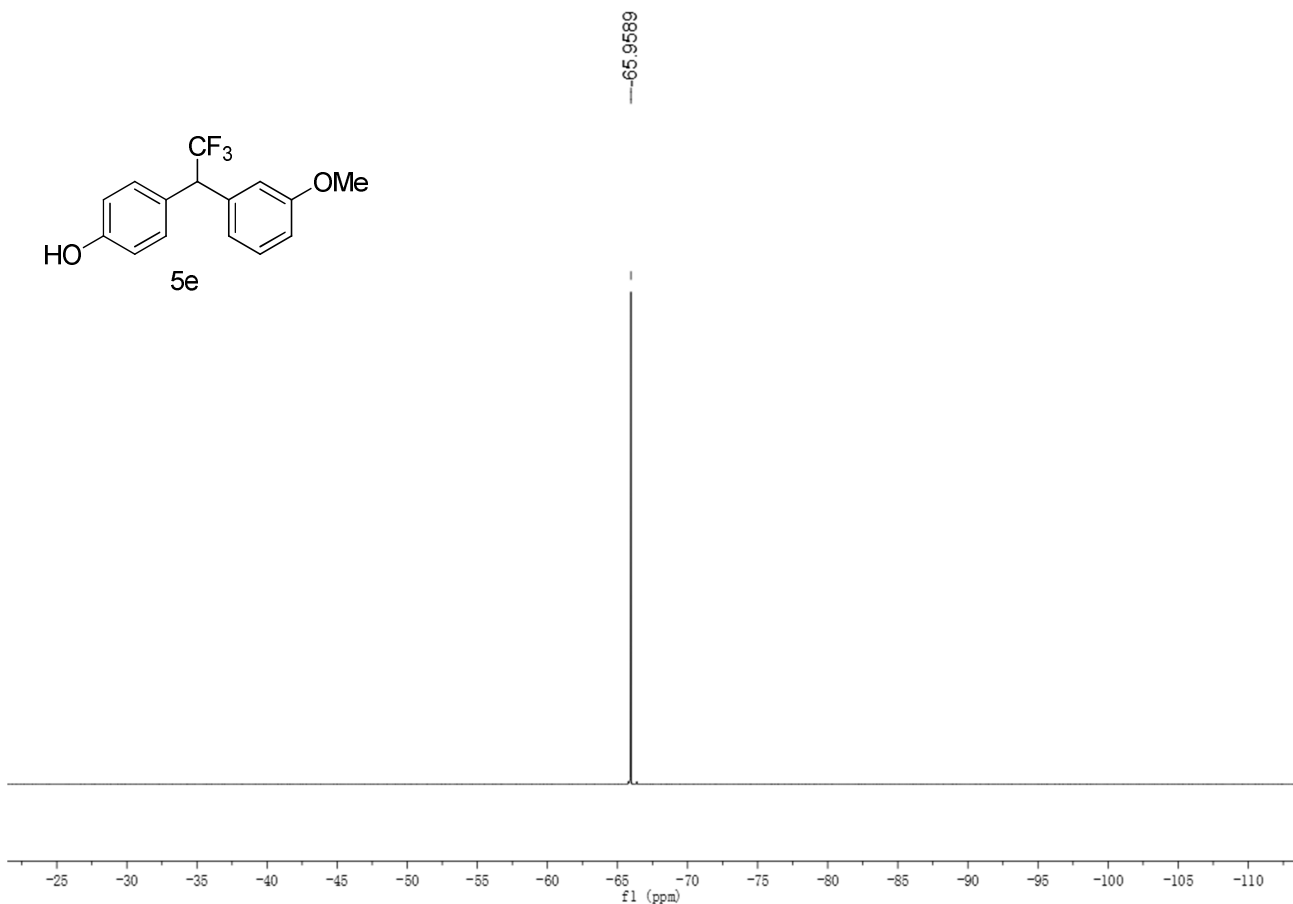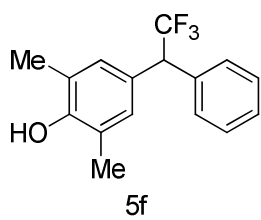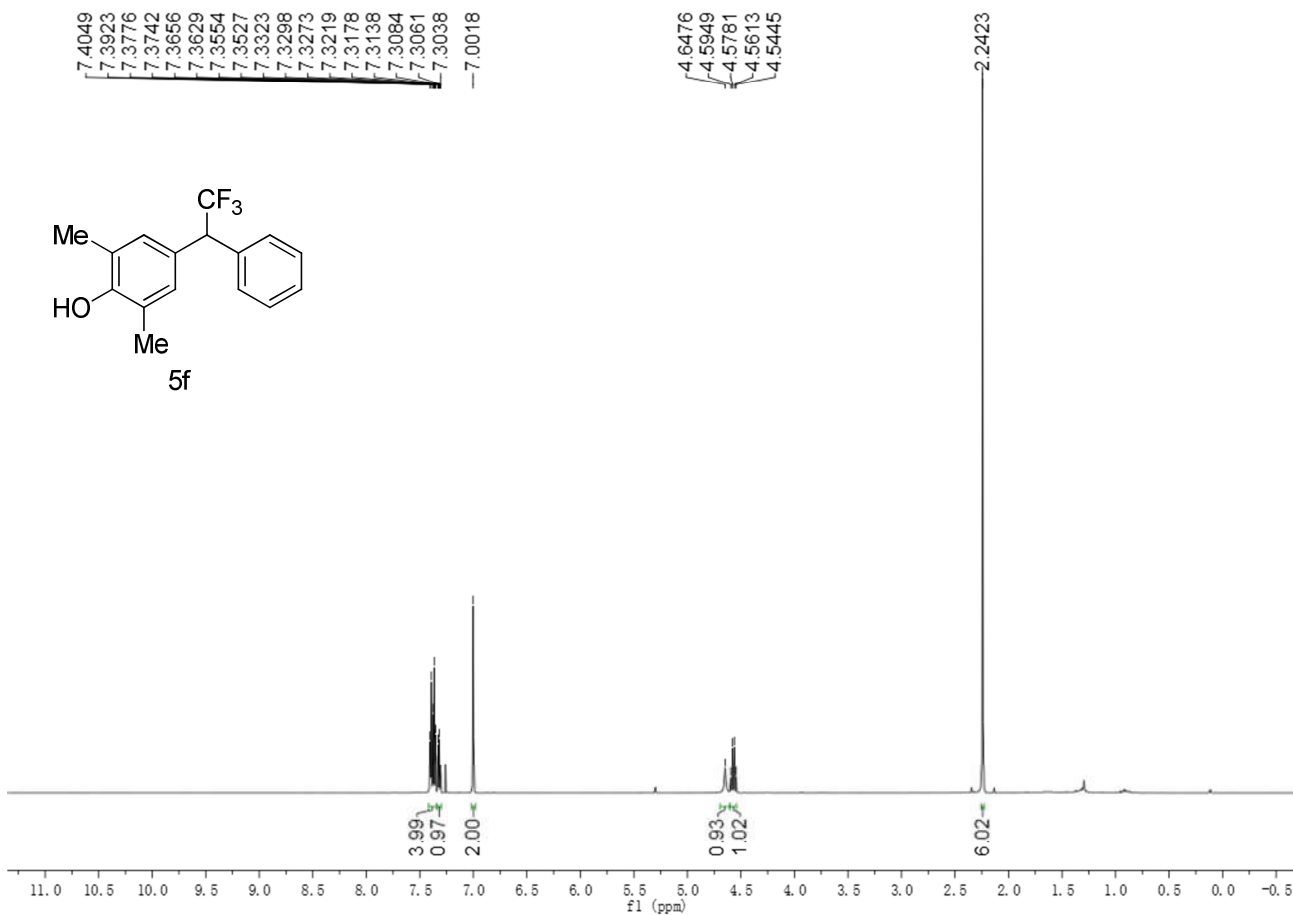

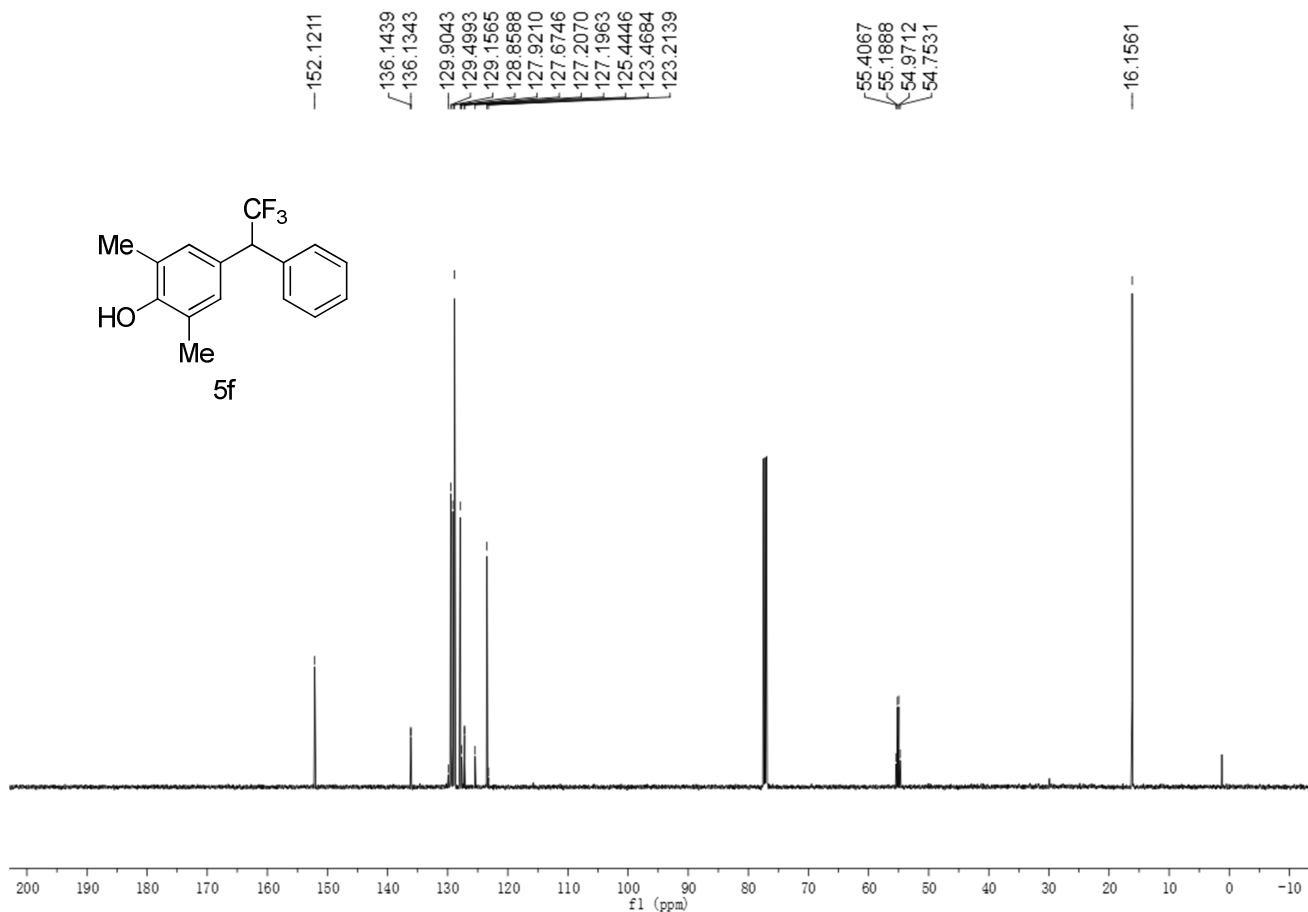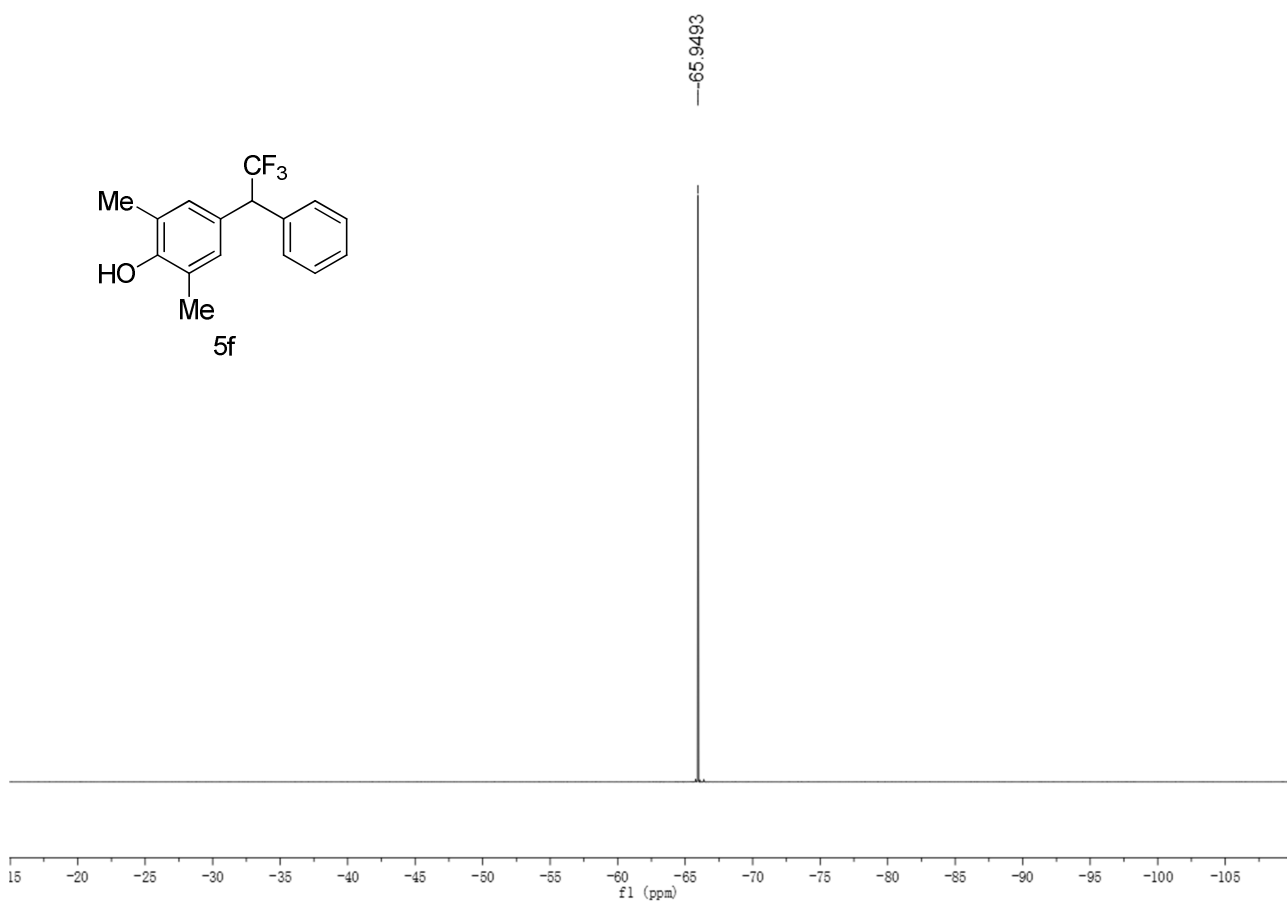

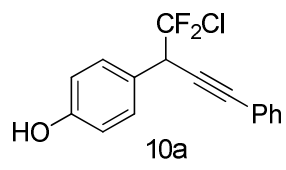

7.4484  
 7.4456  
 7.4424  
 7.4386  
 7.4331  
 7.3906  
 7.3736  
 7.3473  
 7.3436  
 7.3299  
 7.3243  
 7.3208  
 7.3172  
 7.3128  
 7.3096  
 6.8400  
 6.8379  
 6.8228  
 6.8211  
 4.8262  
 4.8180  
 4.8095  
 4.8050  
 4.7963  
 4.7884  
 4.7801  
 4.7747

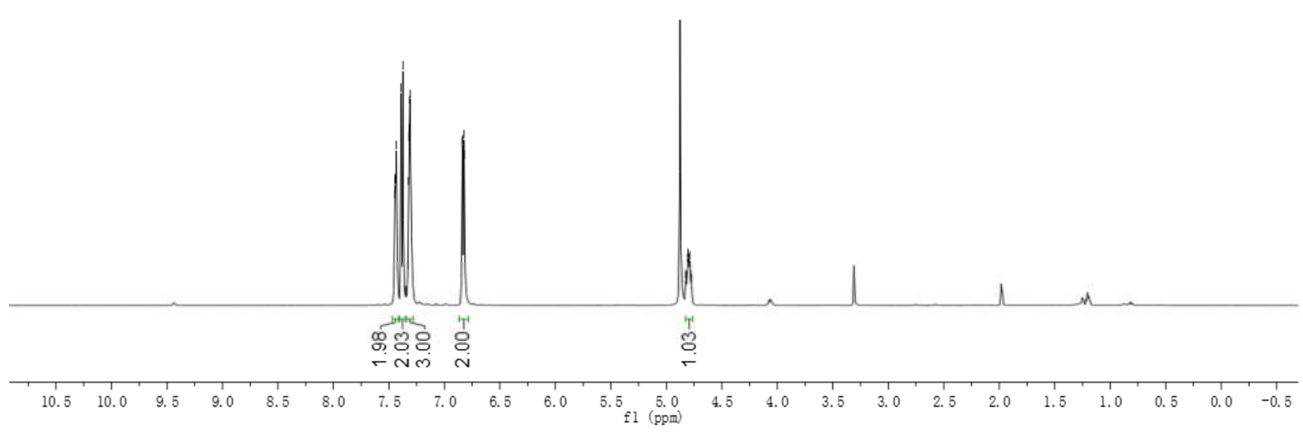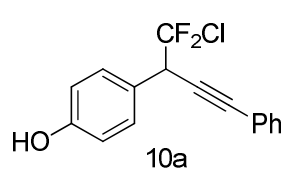

159.1146  
 132.6259  
 132.0535  
 130.1687  
 129.7584  
 129.4583  
 127.8234  
 124.7587  
 123.5469  
 116.2161  
 86.6462  
 84.4383  
 84.4008  
 84.3671  
 50.5668  
 50.3561  
 50.1350

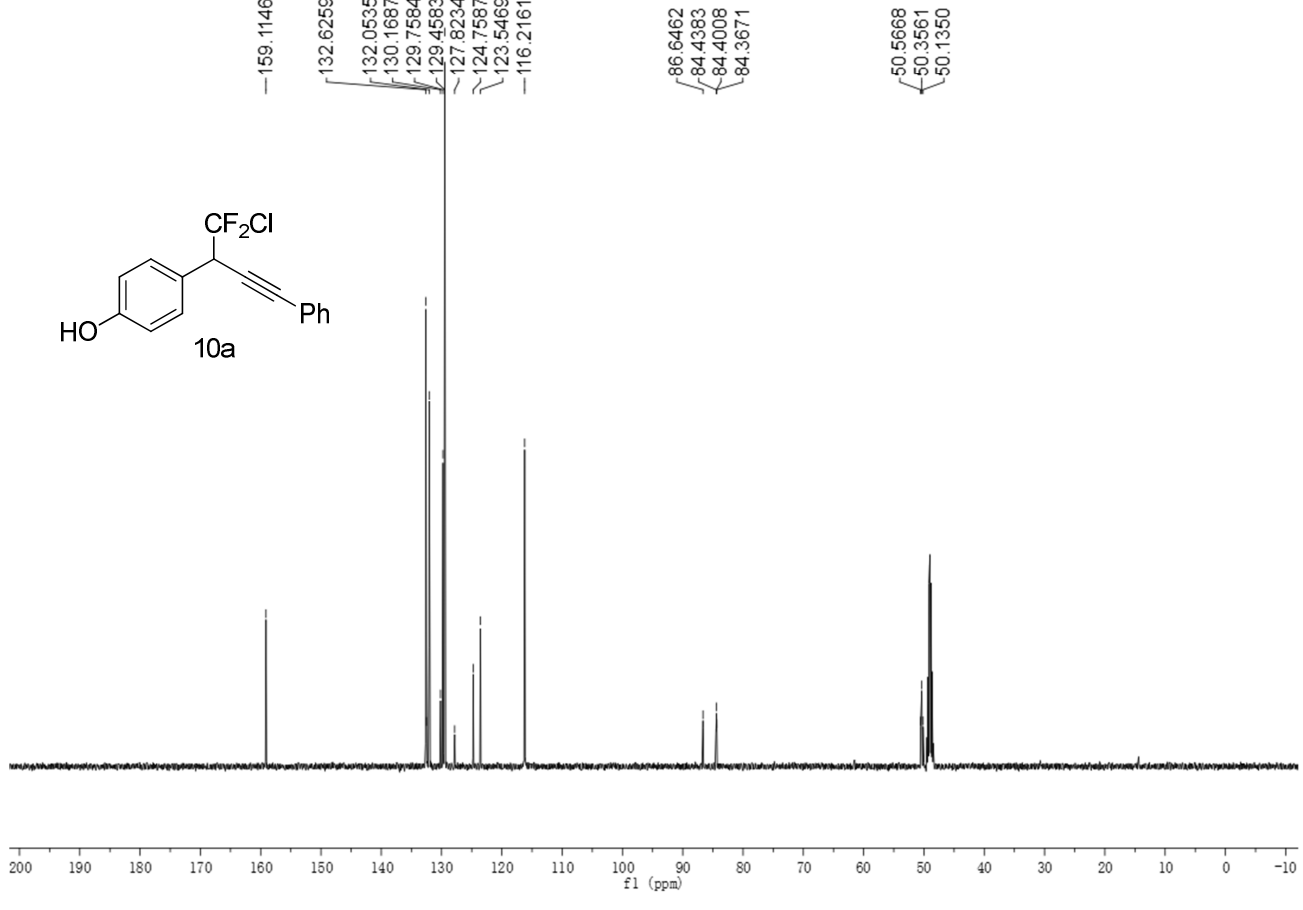

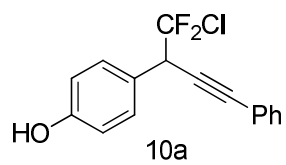

51.7715  
 51.7862  
 51.8004  
 52.1080  
 52.1228  
 52.1371  
 53.6694  
 53.6832  
 53.6974  
 54.0059  
 54.0199  
 54.0340

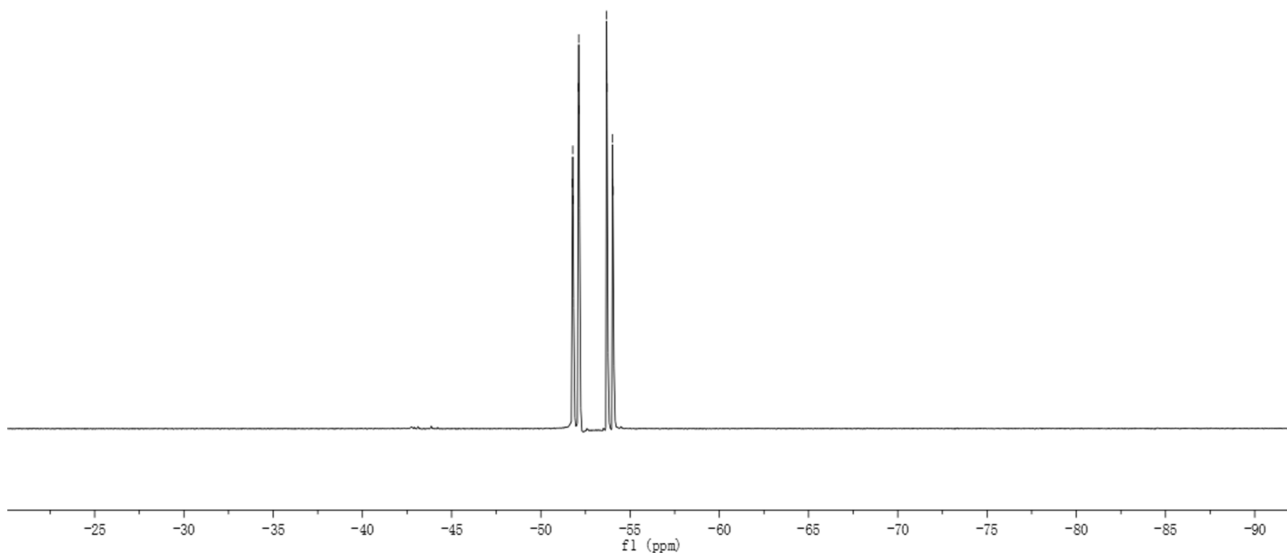

7.3643  
 7.3602  
 7.3481  
 7.3471  
 7.3311  
 6.8860  
 6.8806  
 6.8764  
 6.8674  
 6.8628  
 6.8295  
 6.8122  
 4.7200  
 4.6991  
 4.6825  
 4.6615  
 -3.7699

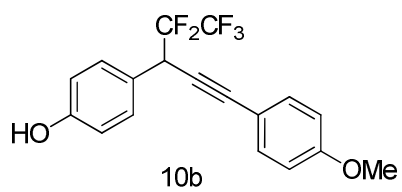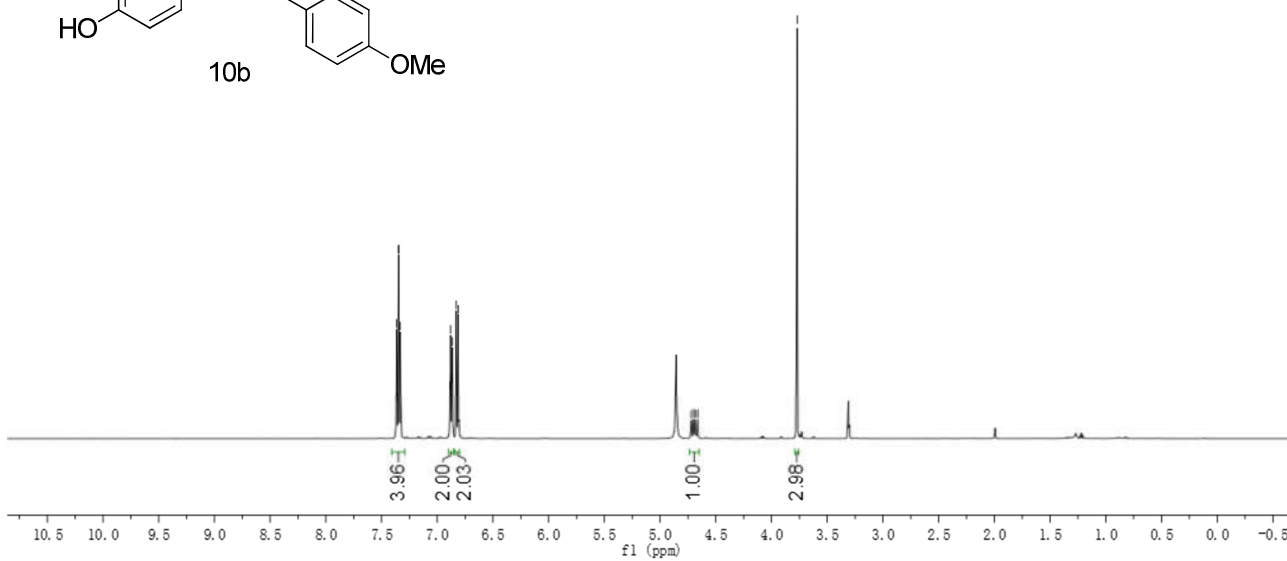

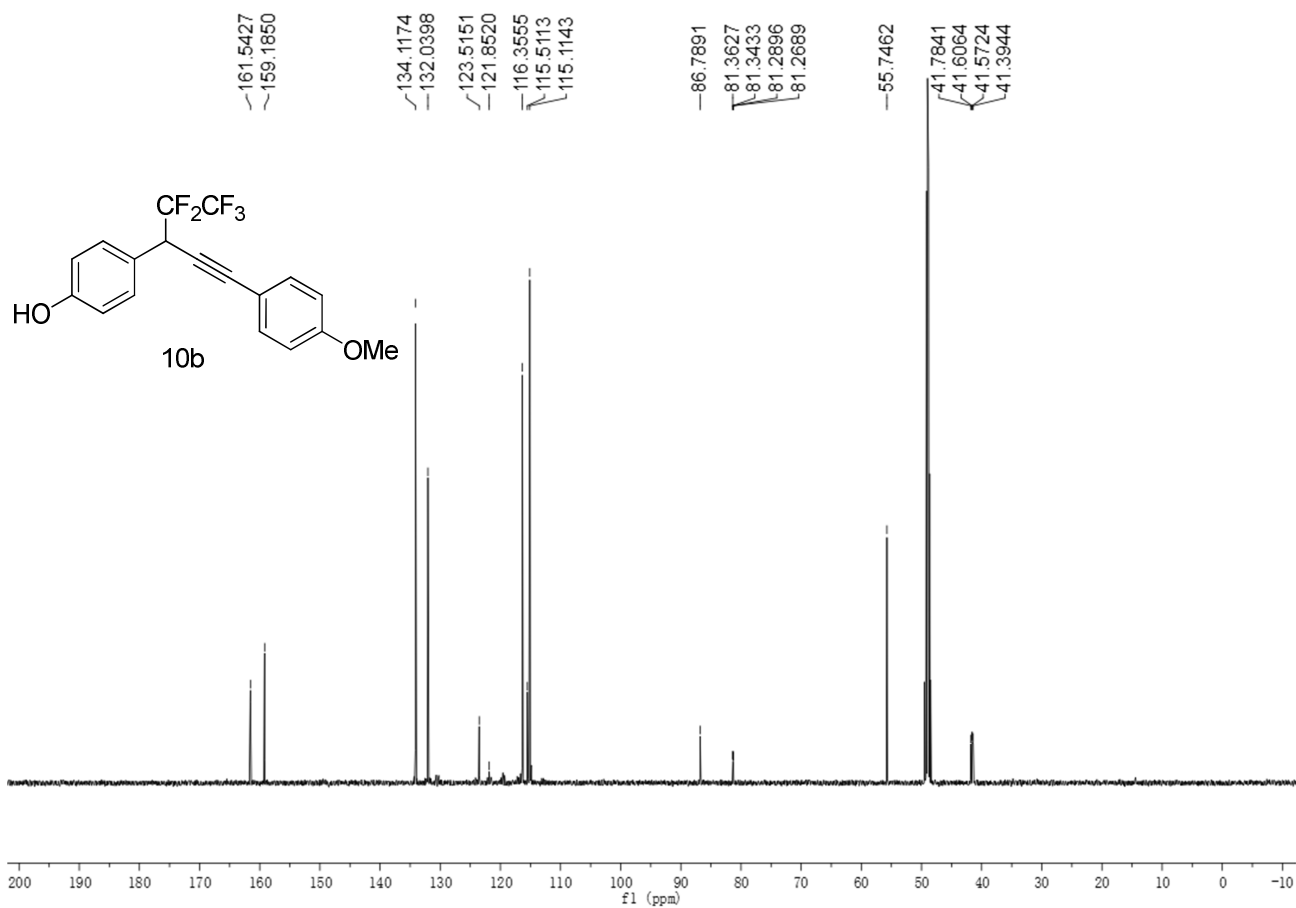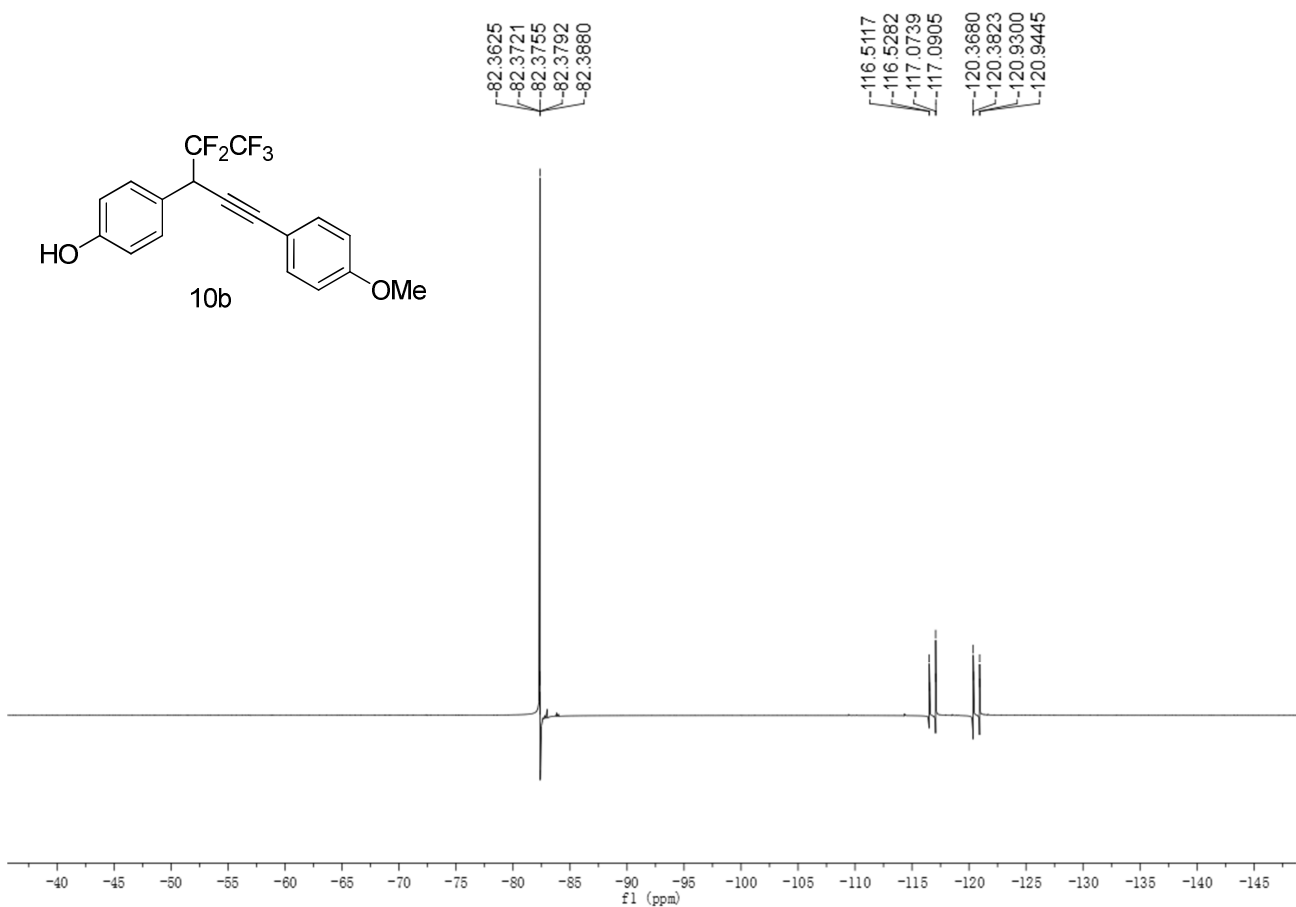

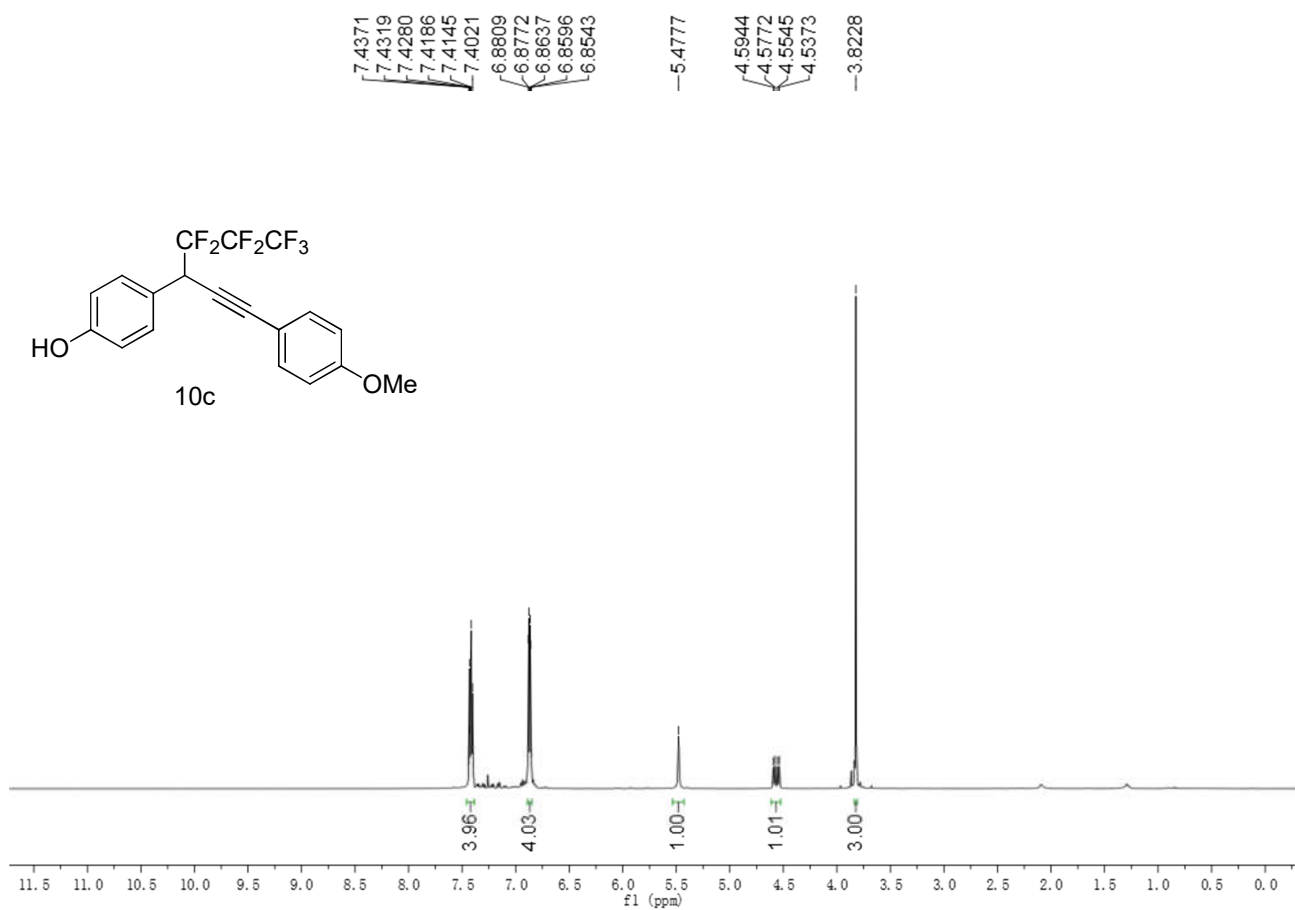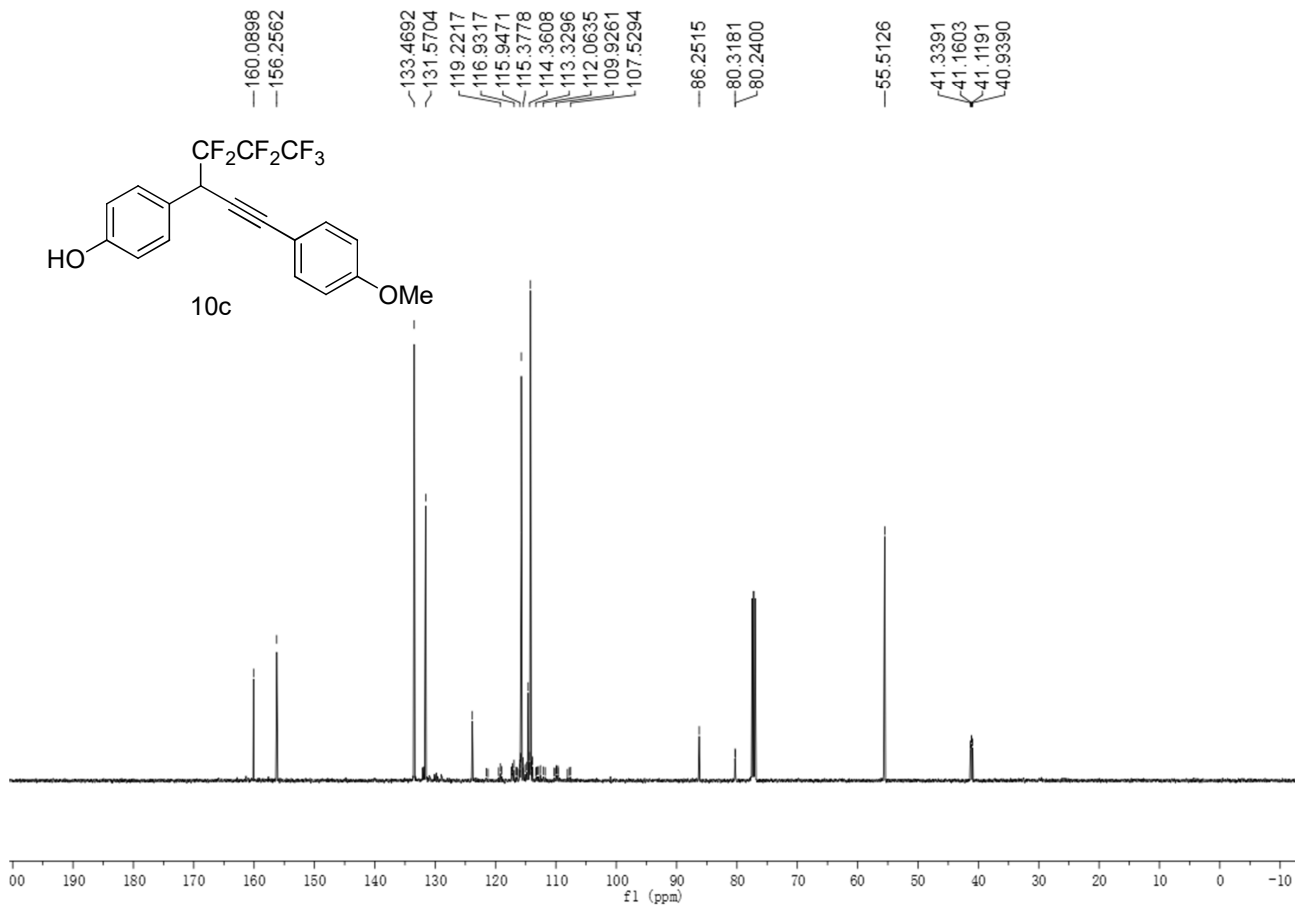



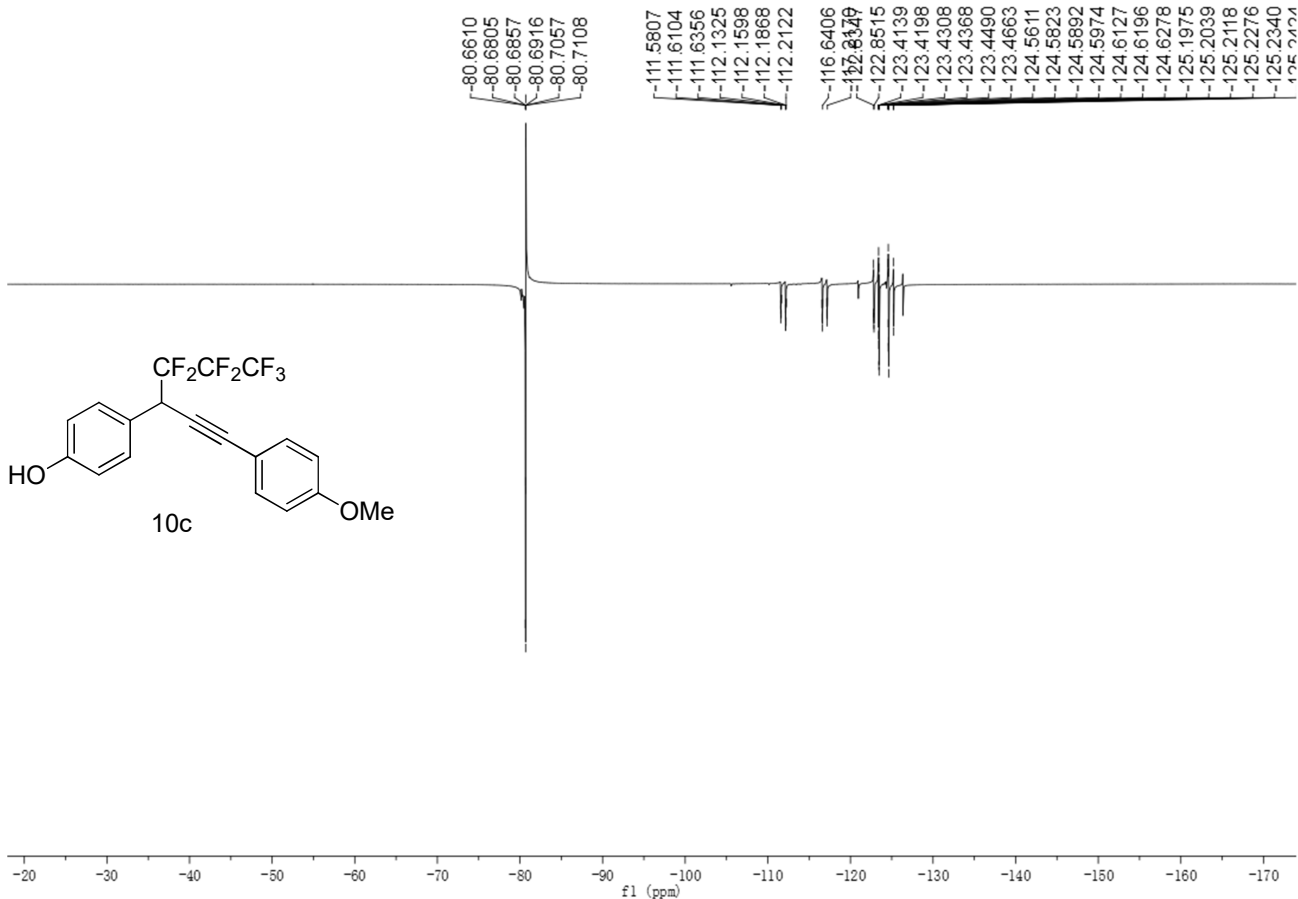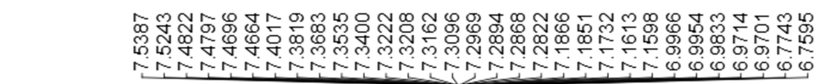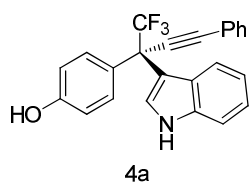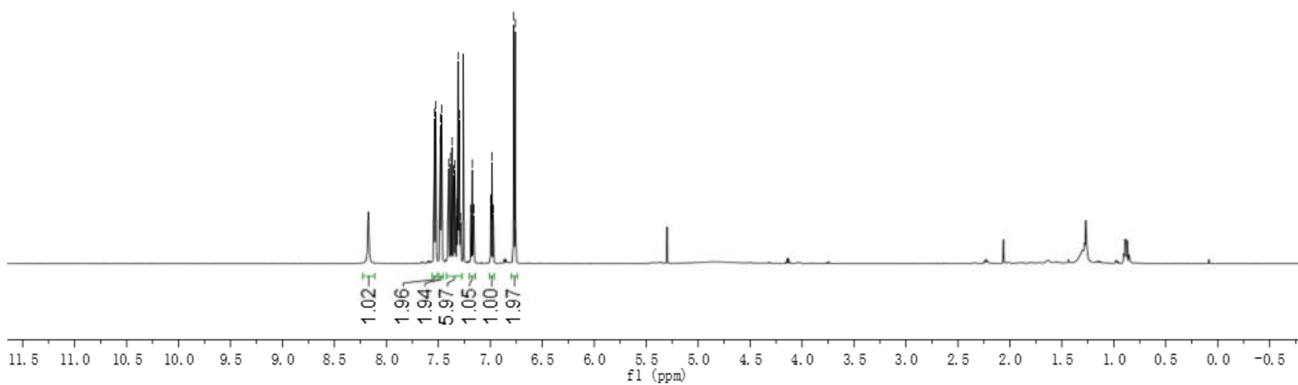

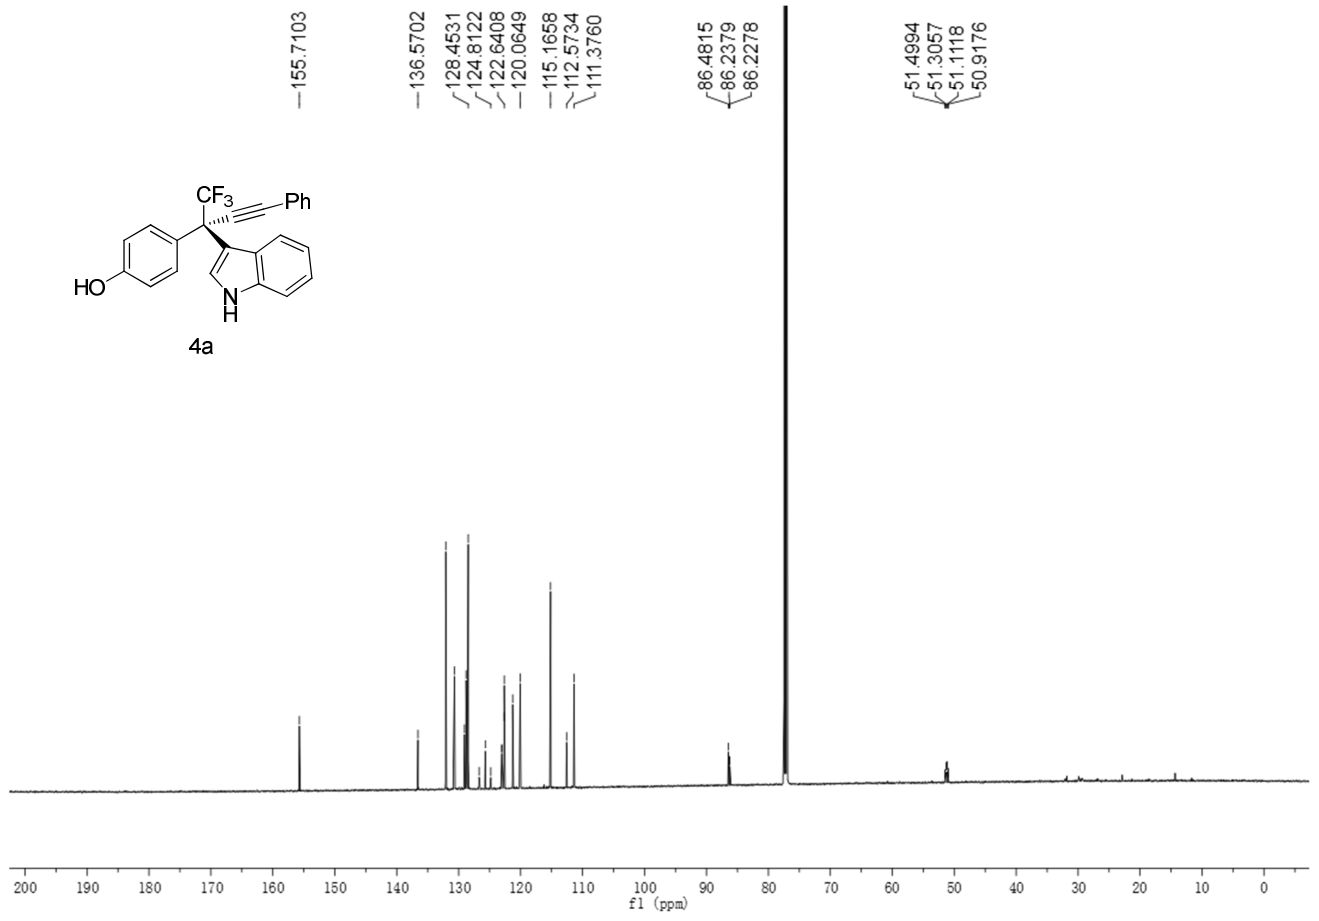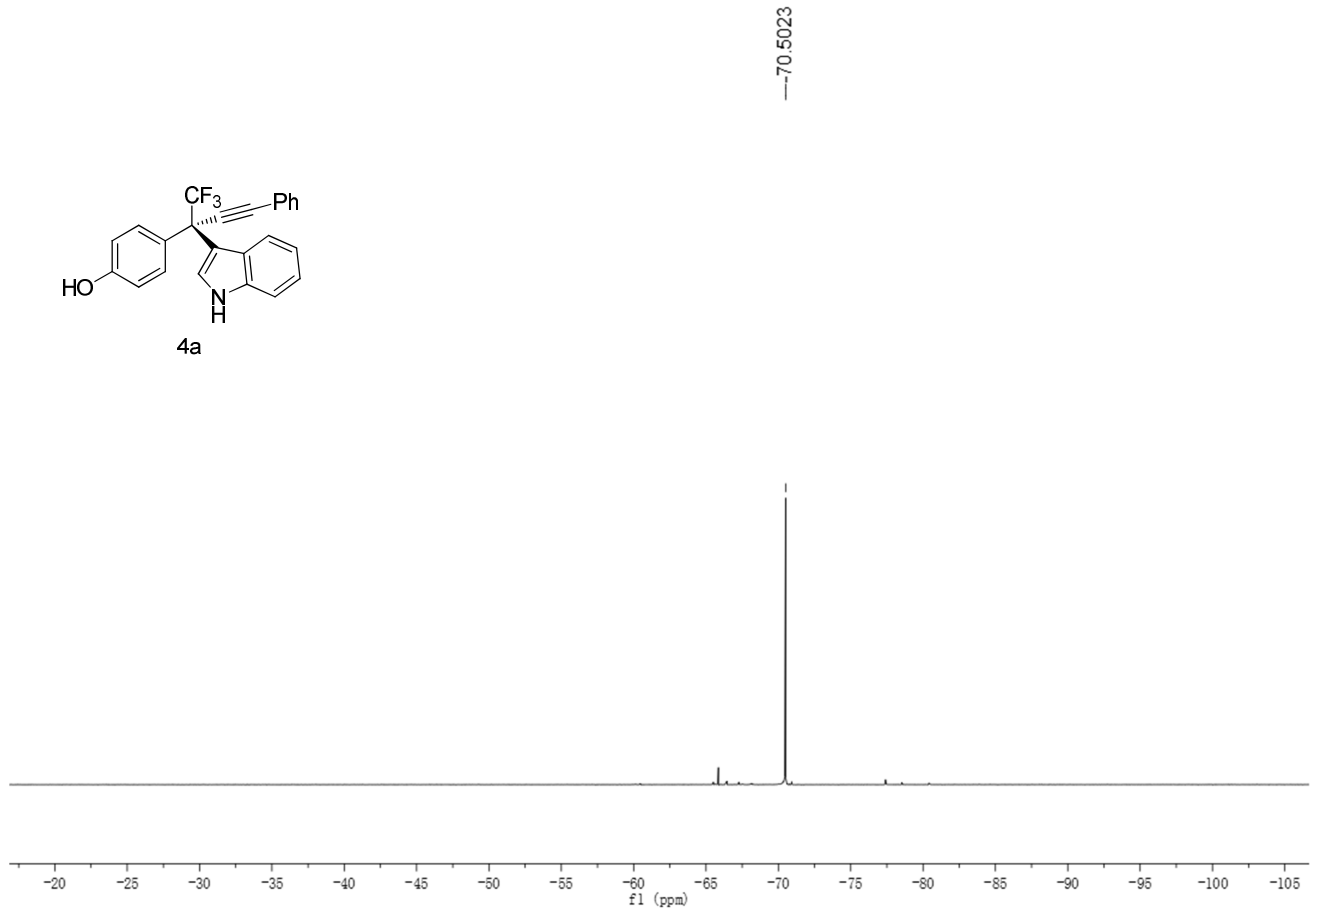

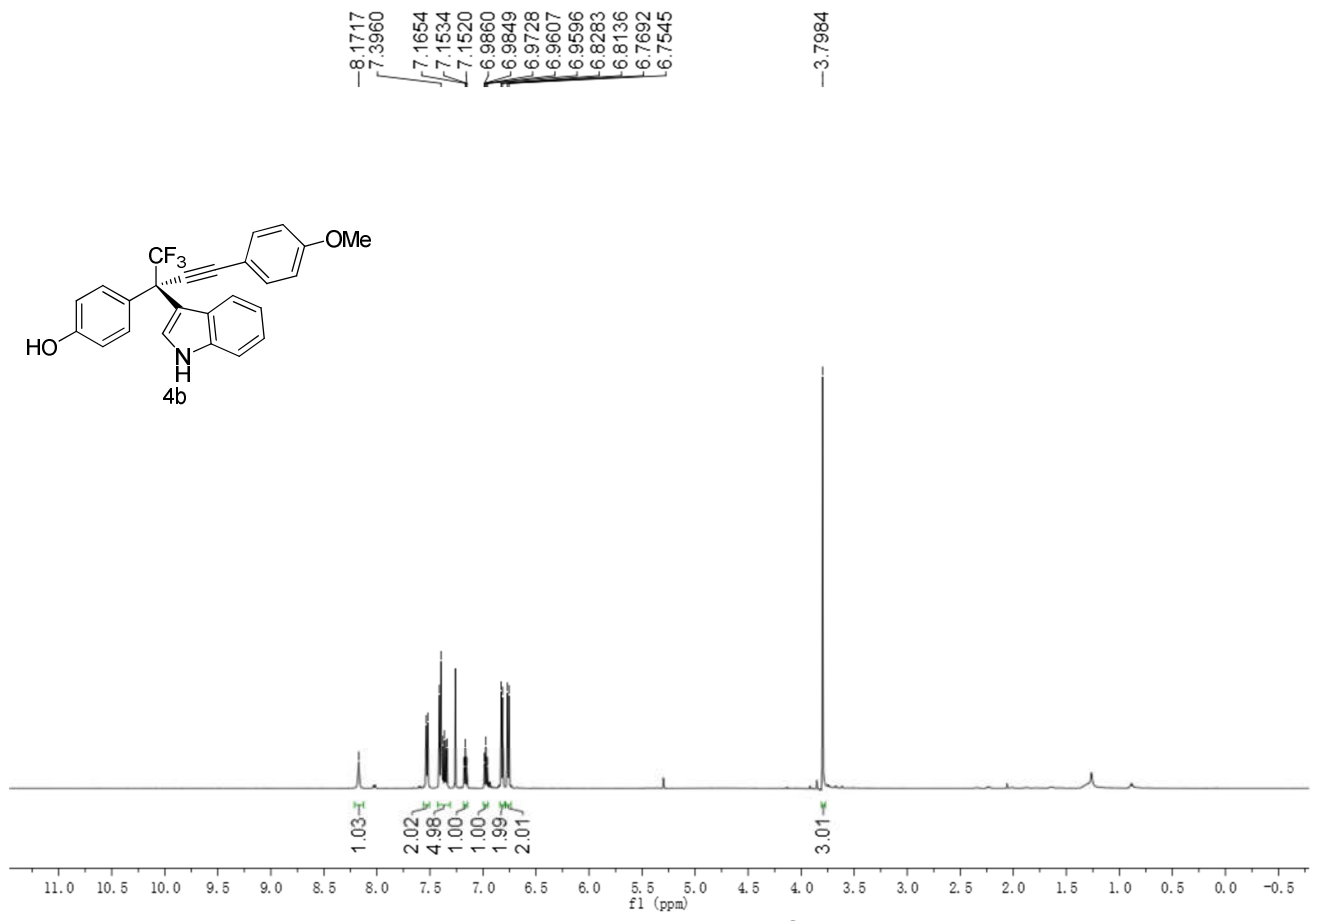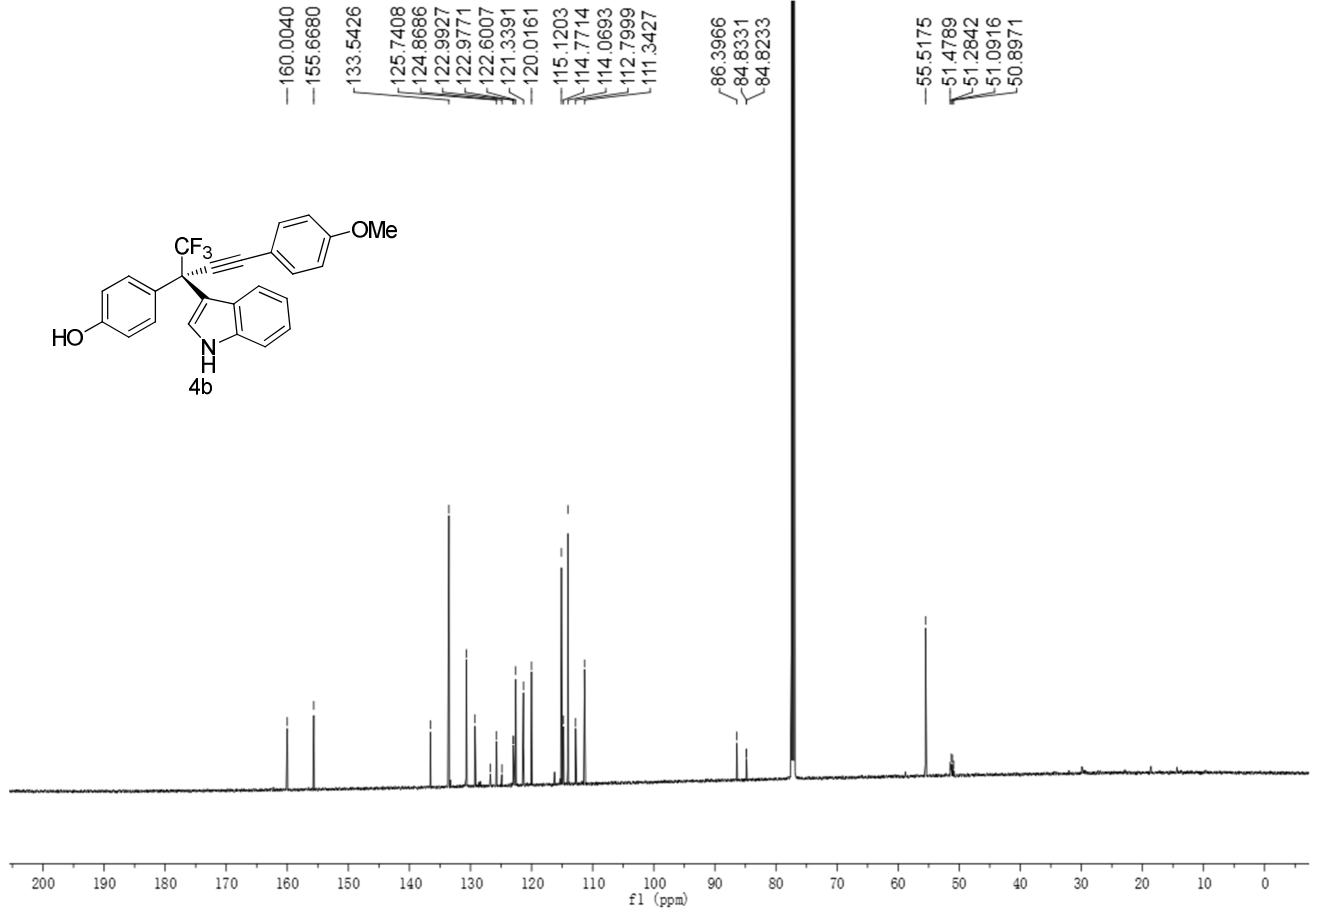

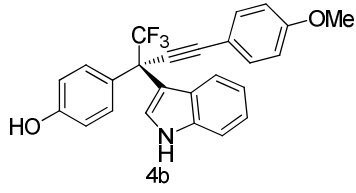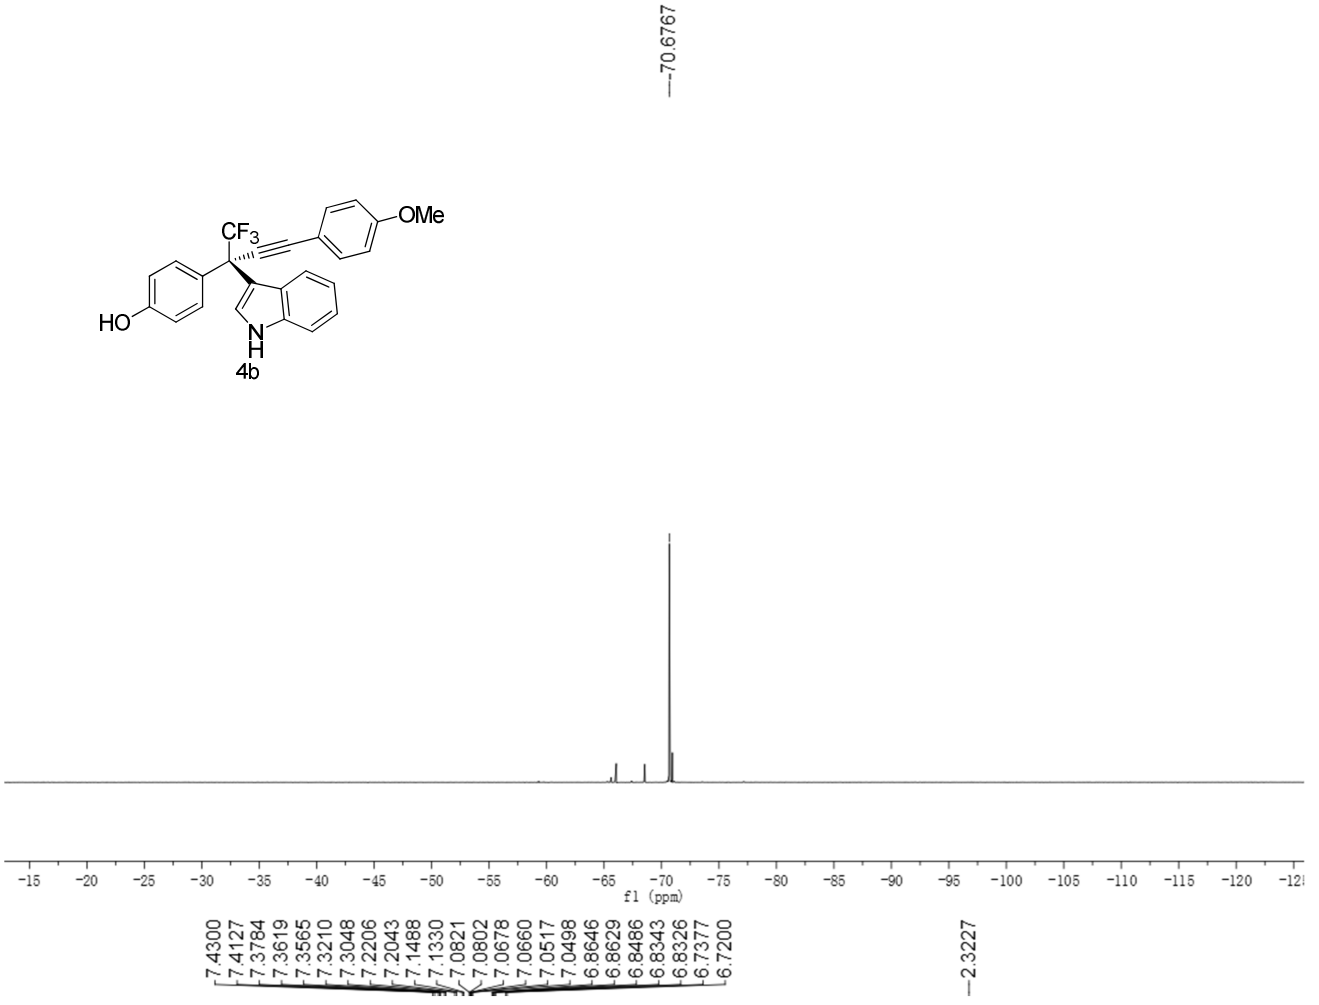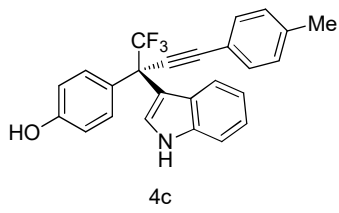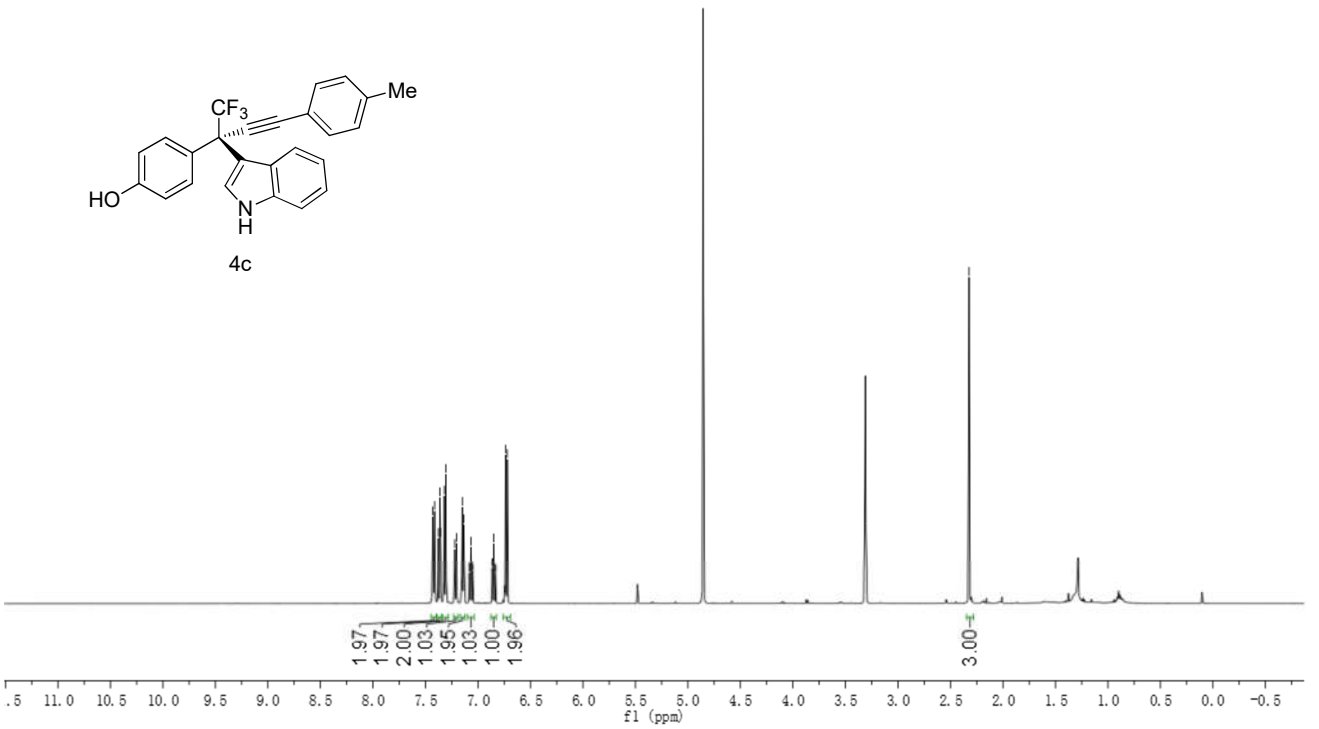

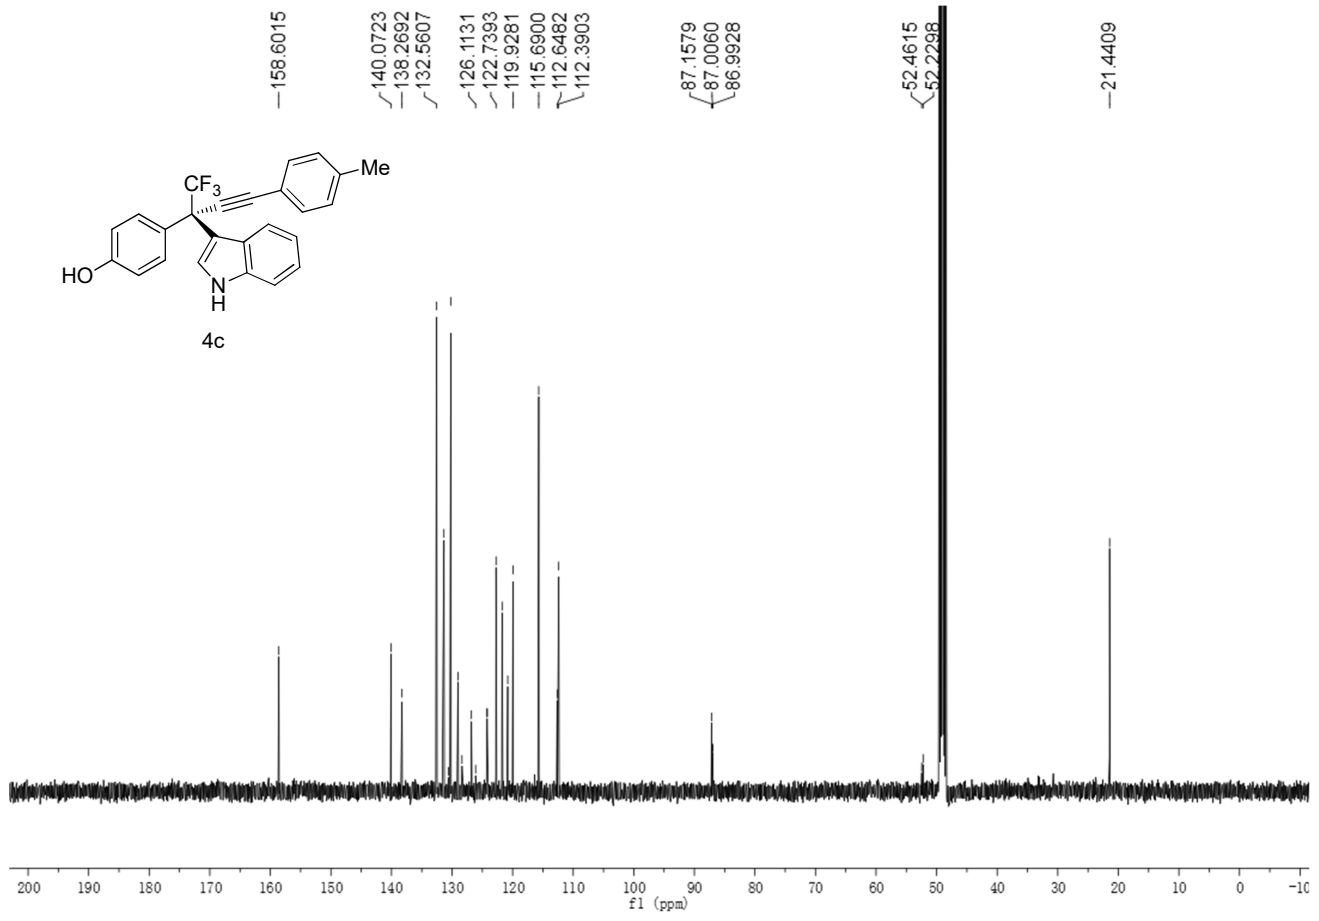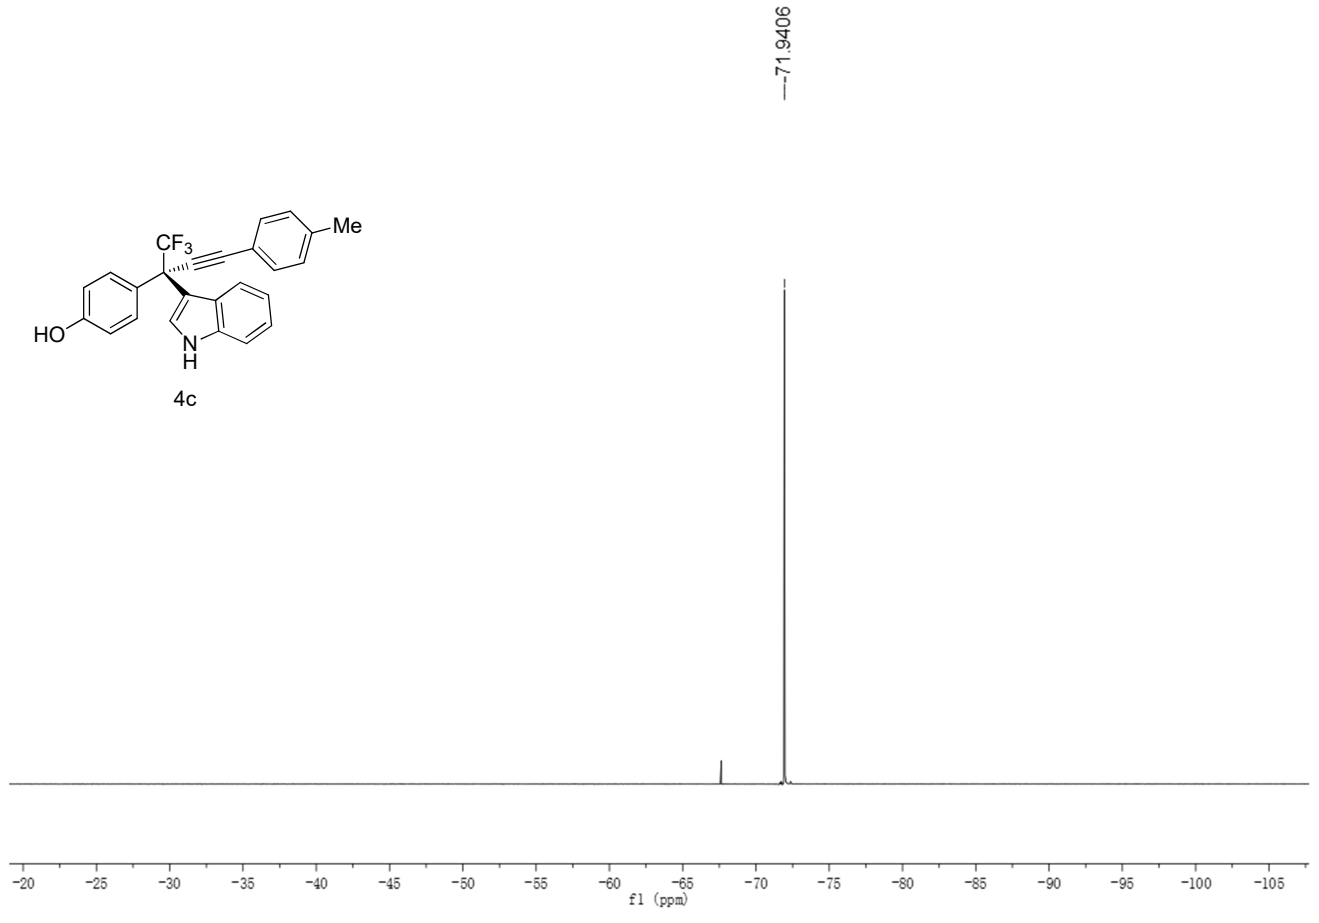

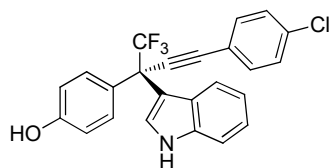

4d

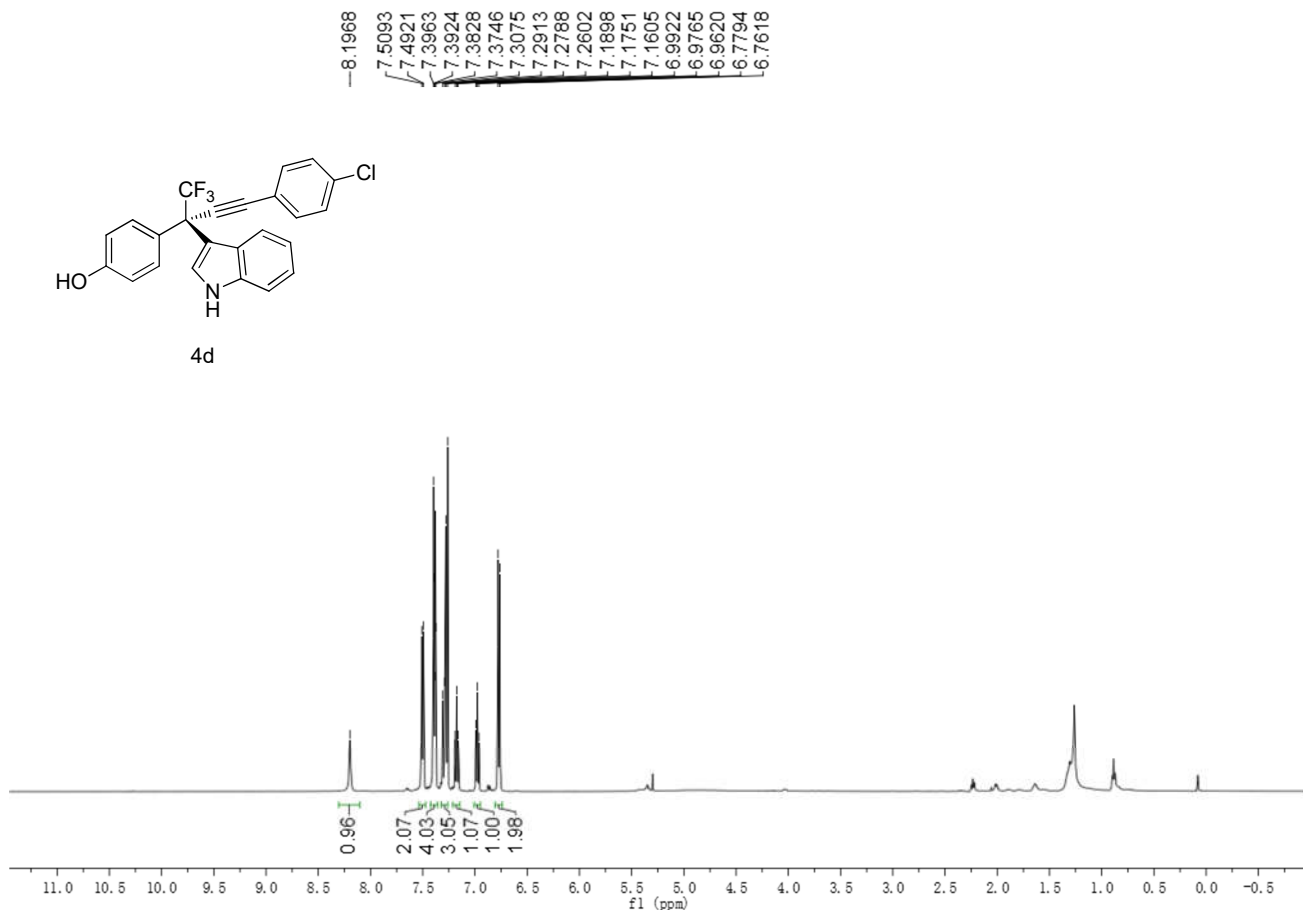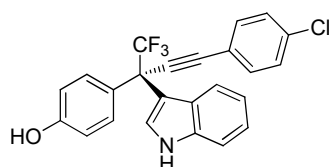

4d

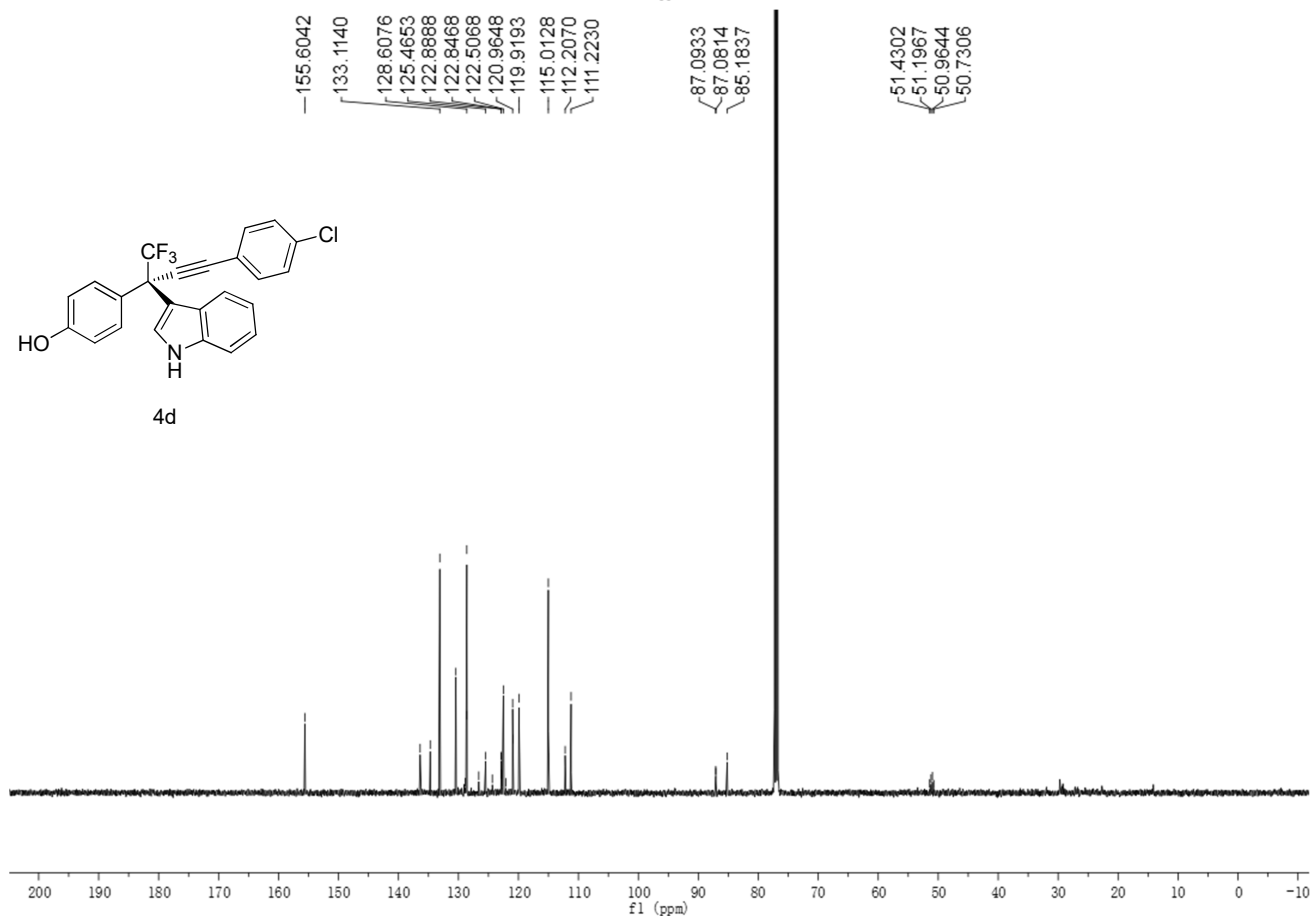

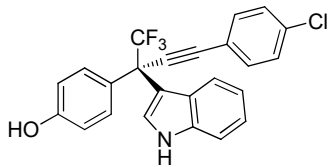

4d

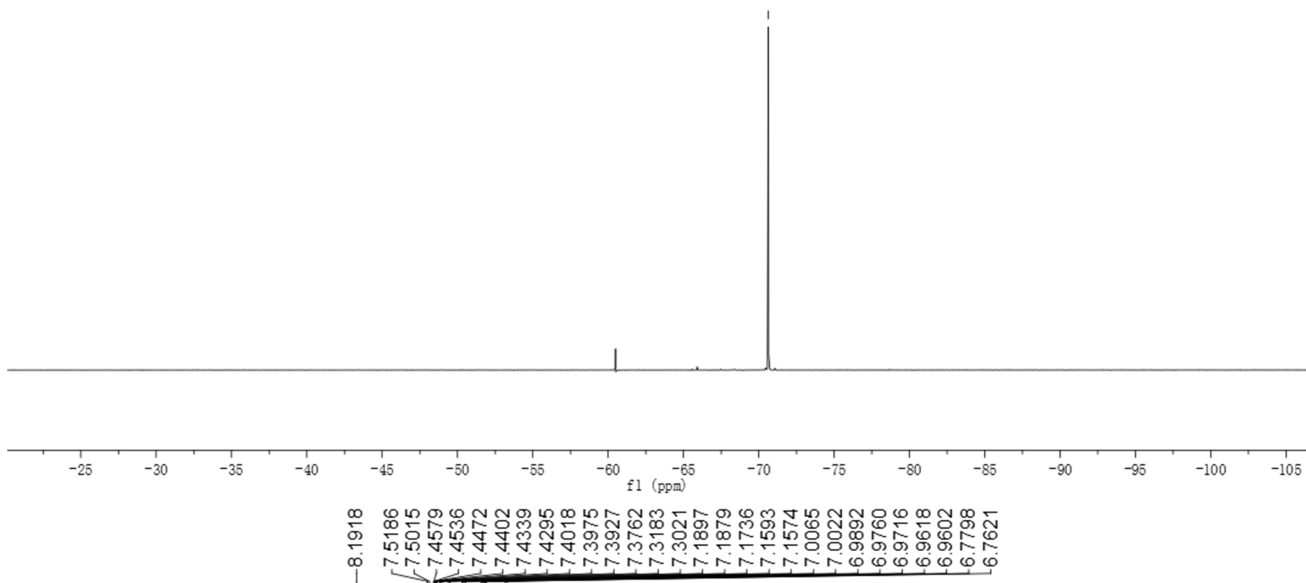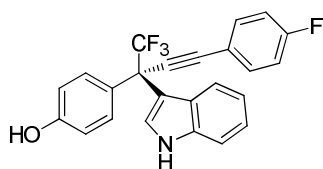

4e

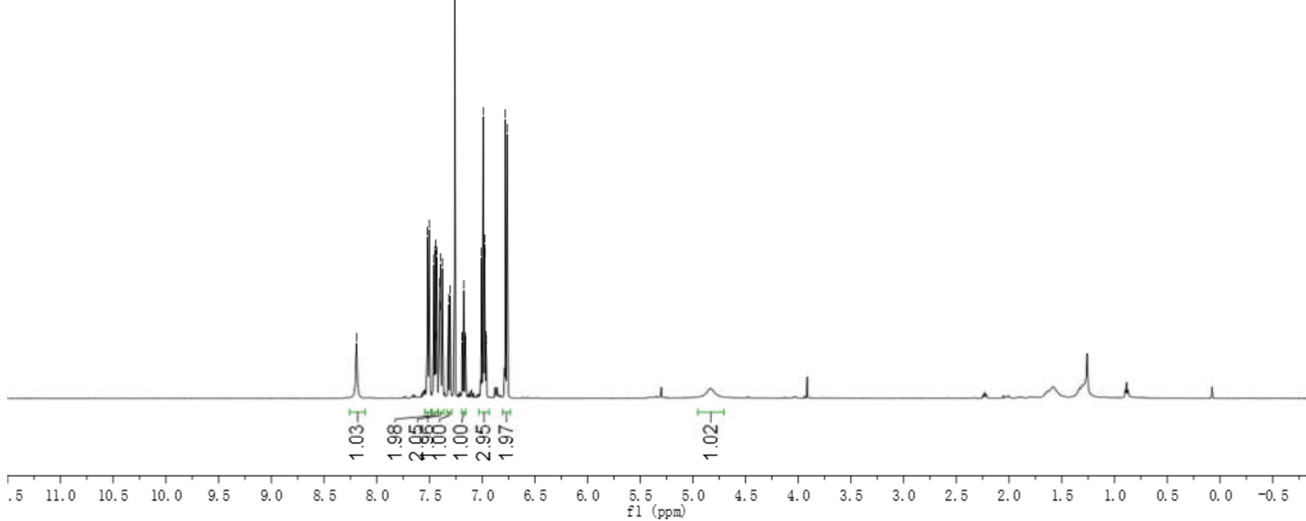

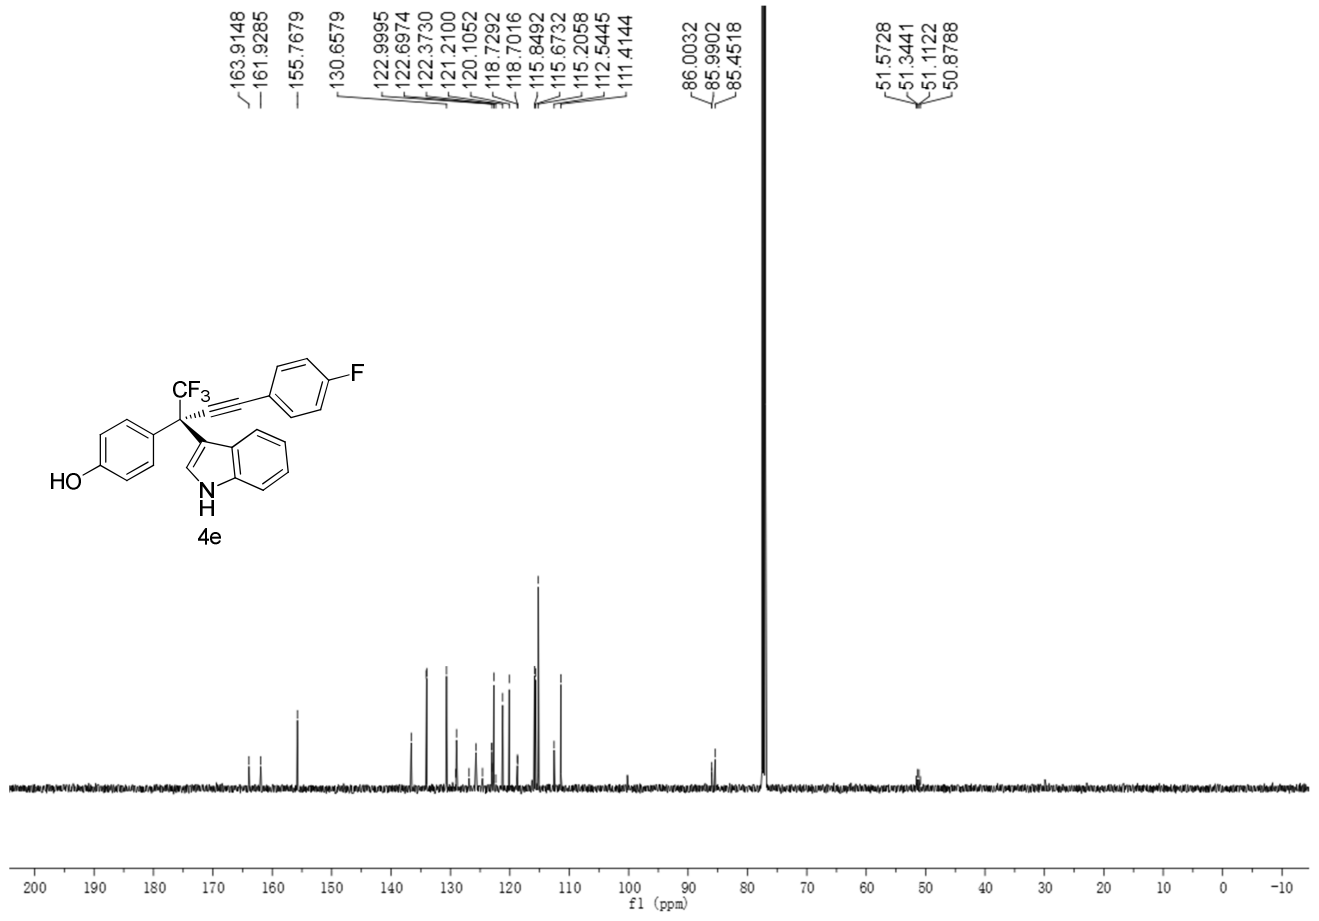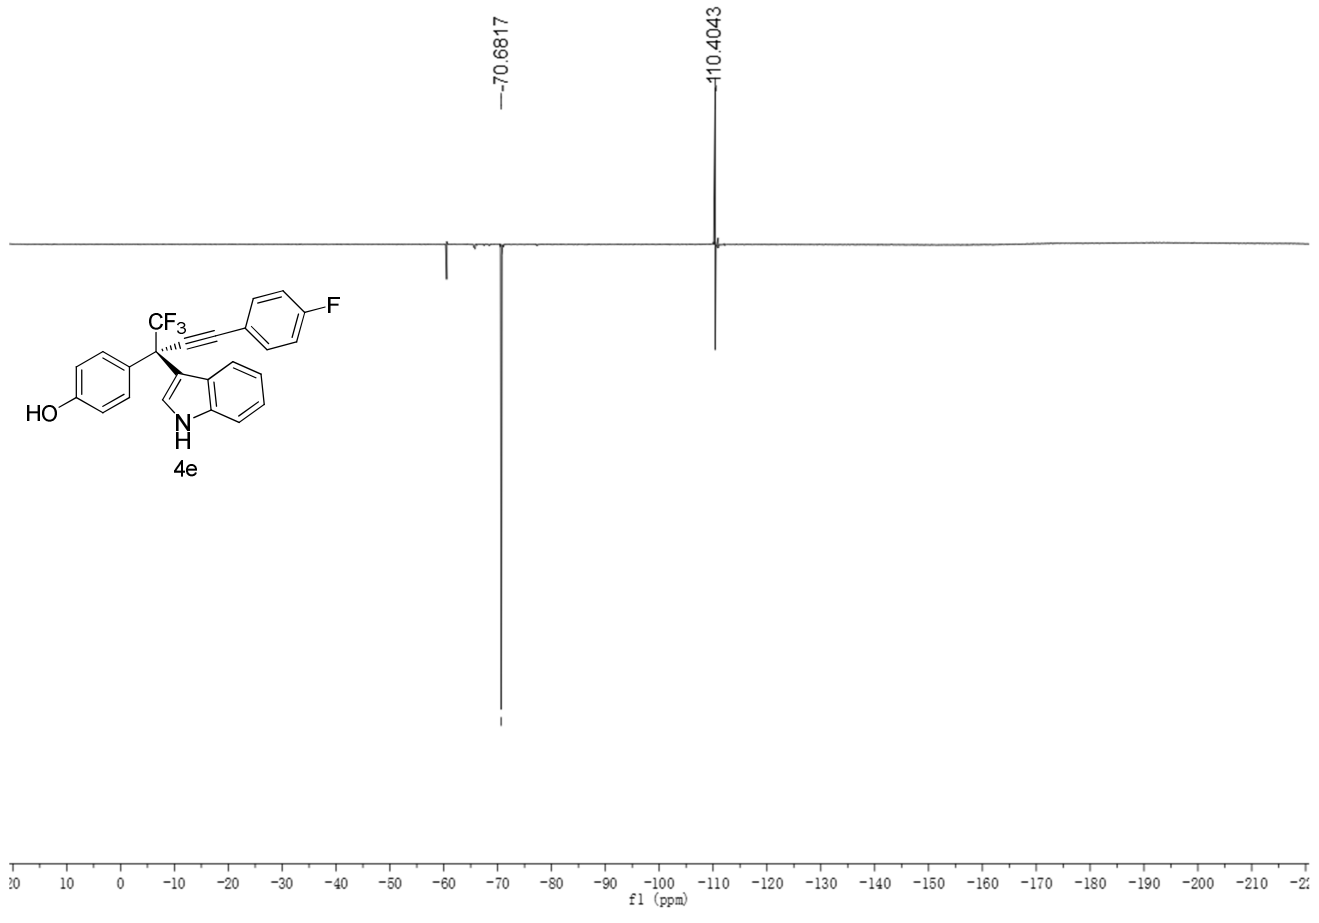



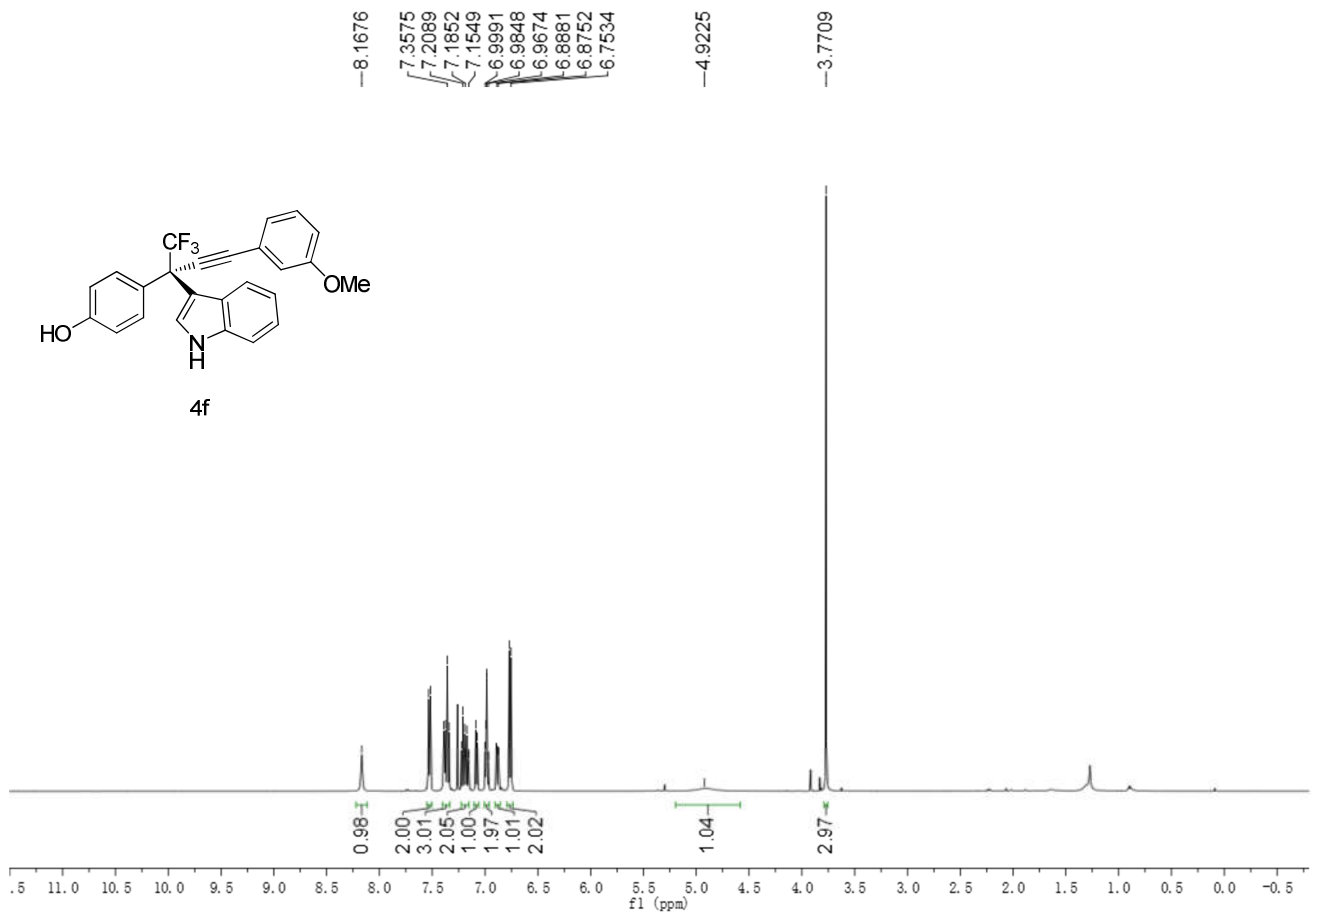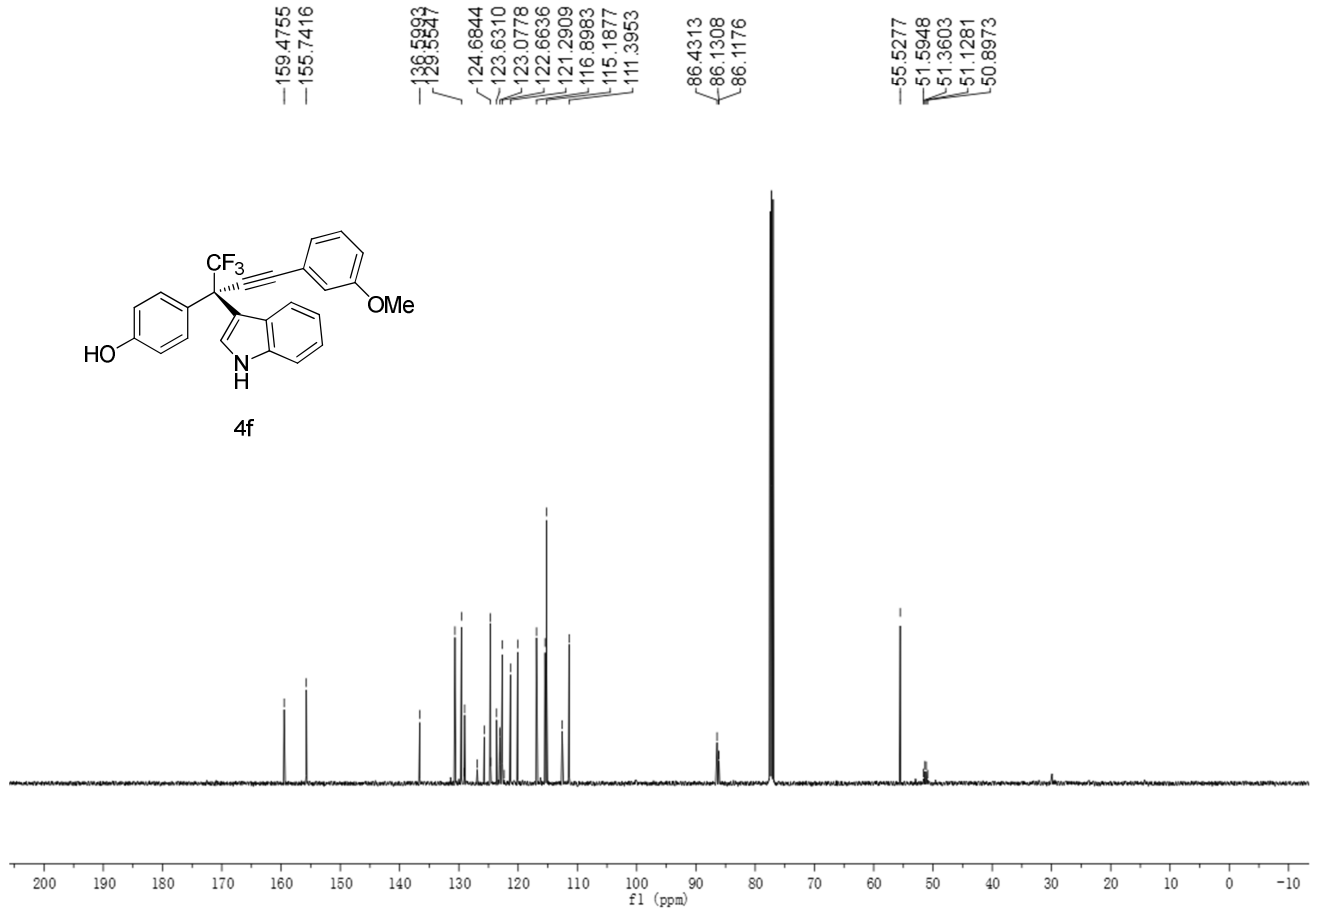

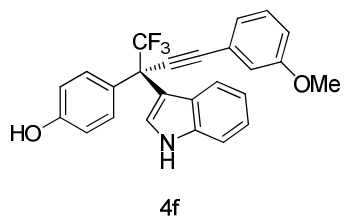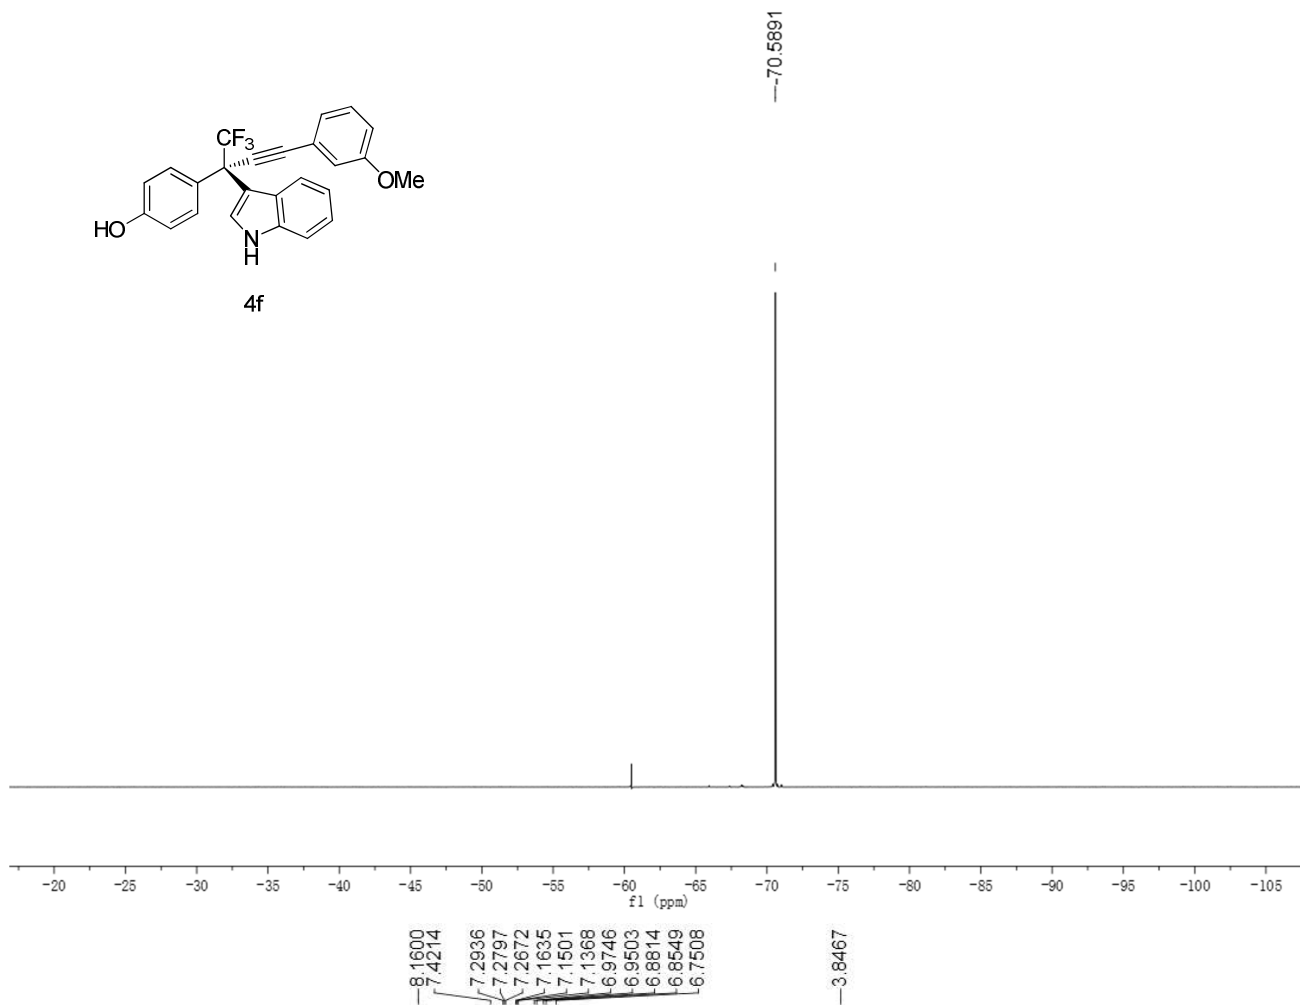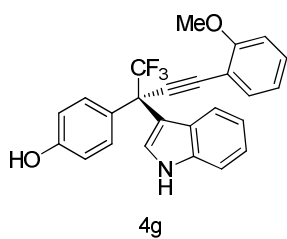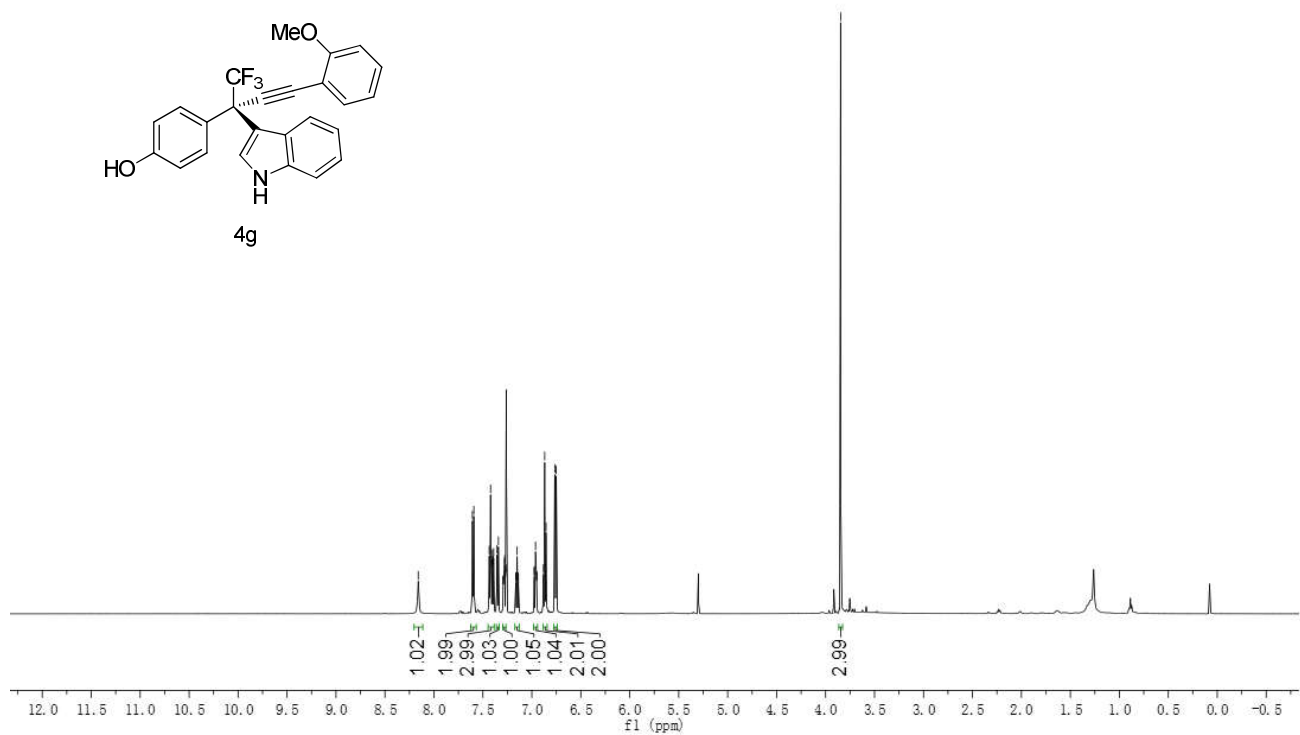

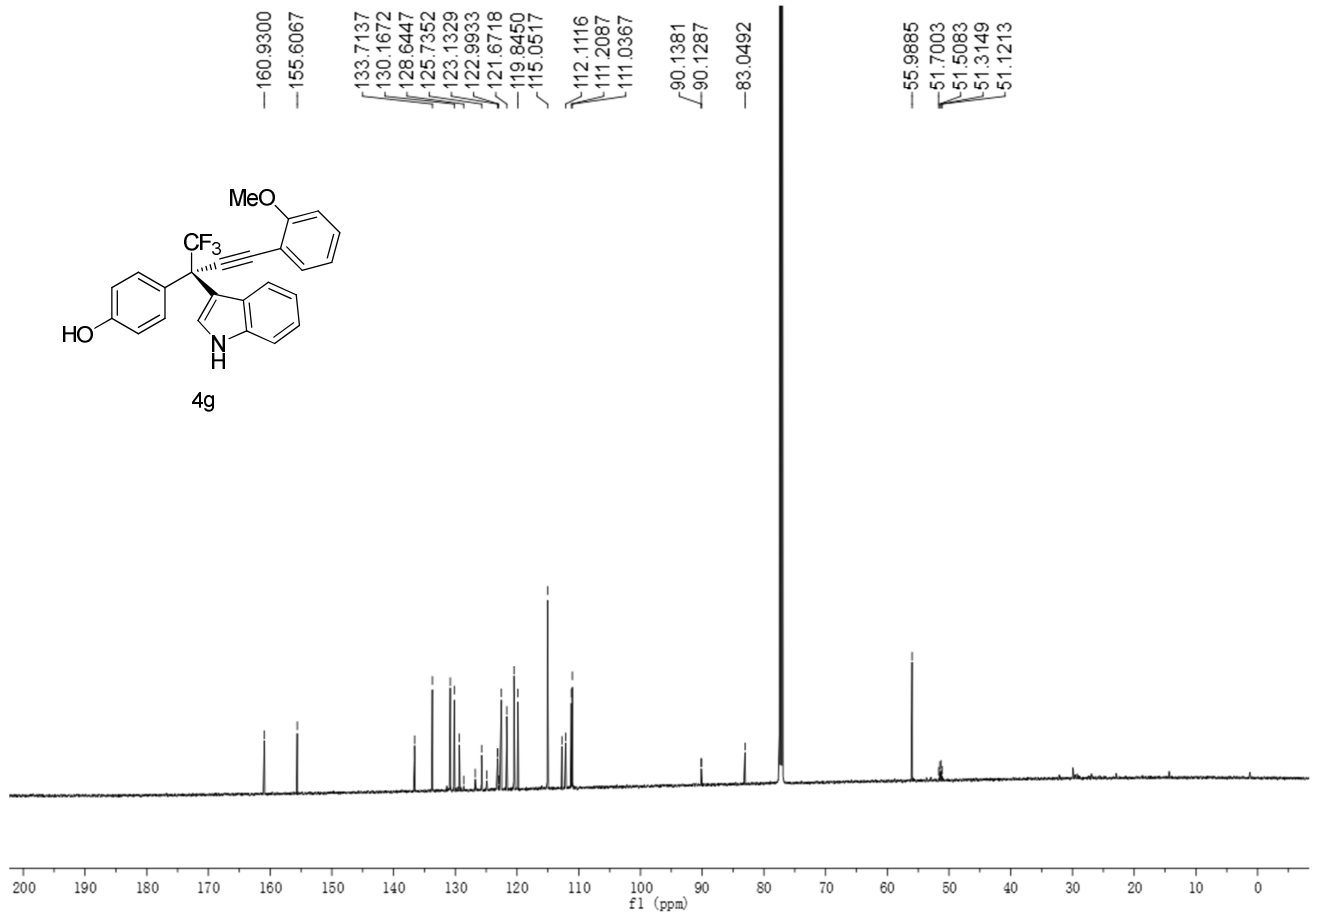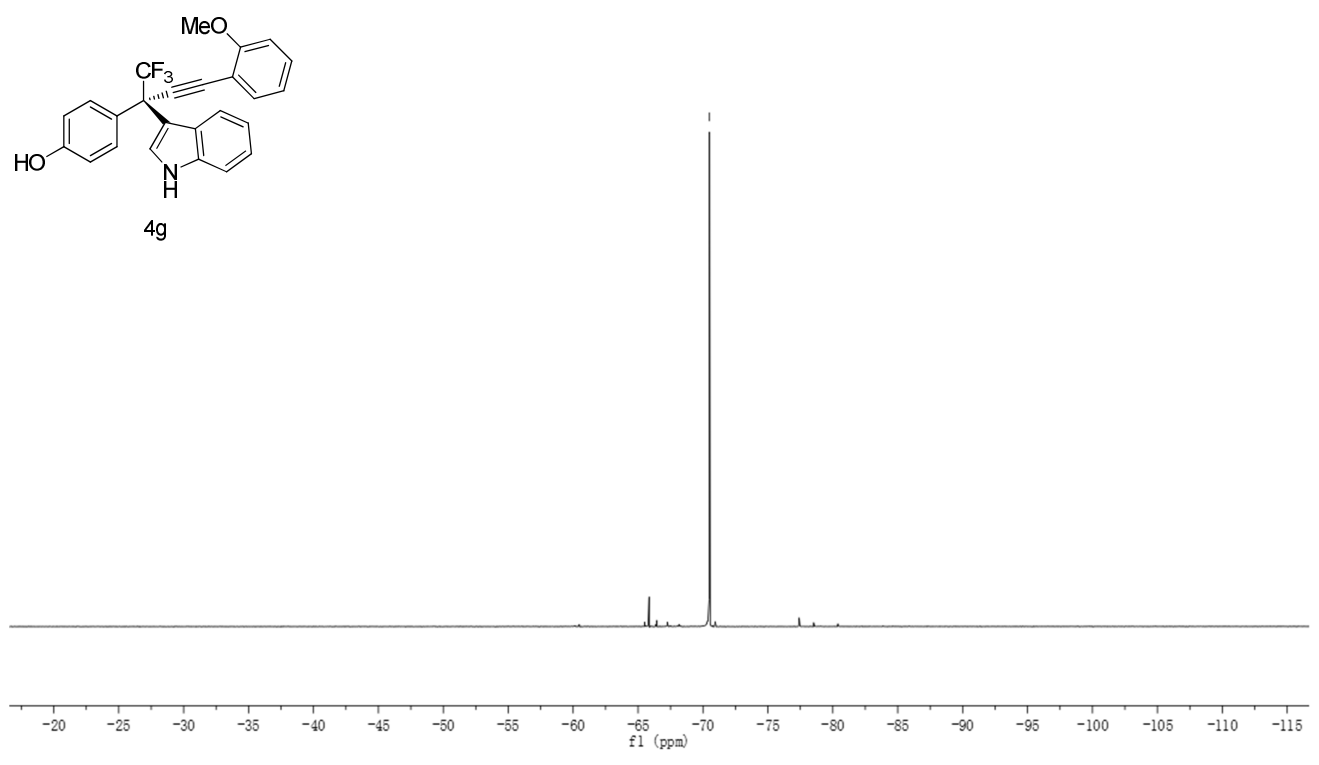

8.1665  
7.9983  
7.8090  
7.8024  
7.7902  
7.7676  
7.7509  
7.5852  
7.5680  
7.5201  
7.5171  
7.5030  
7.4912  
7.4834  
7.4773  
7.4723  
7.4178  
7.4015  
7.3847  
7.3683  
7.2072  
7.1915  
7.1769  
7.0307  
7.0156  
7.0009  
6.7875  
6.7699  
-4.9880

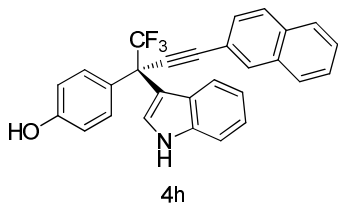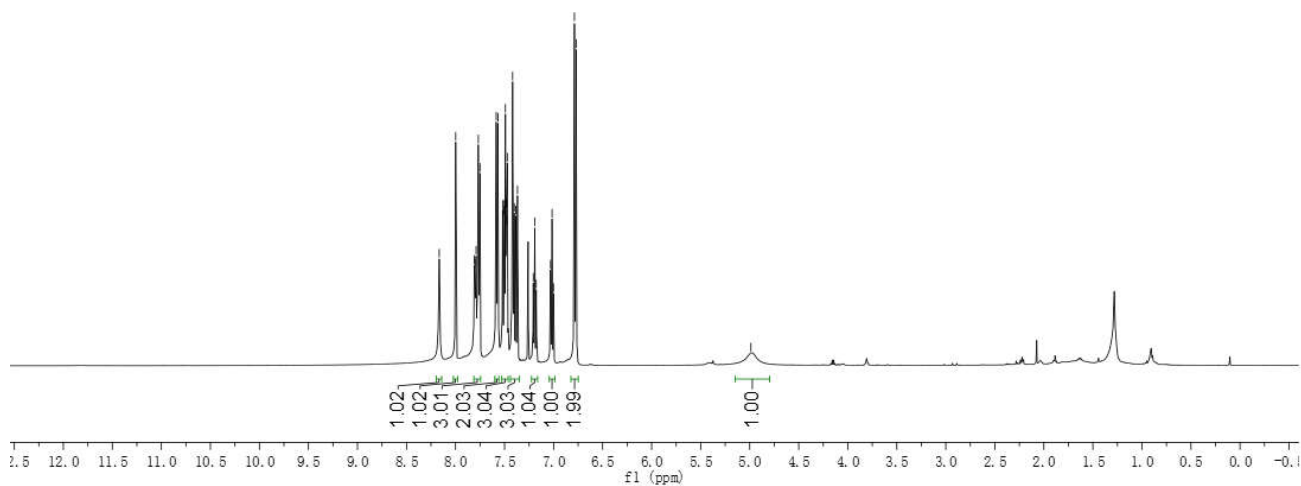

155.7569  
133.0477  
129.1989  
128.1303  
126.9900  
125.7388  
123.1215  
122.4166  
119.8858  
115.2136  
112.5801  
111.4292  
86.8535  
86.5421  
86.5298  
86.5083  
51.6861  
51.4559  
51.2219  
50.9681

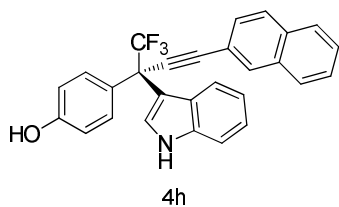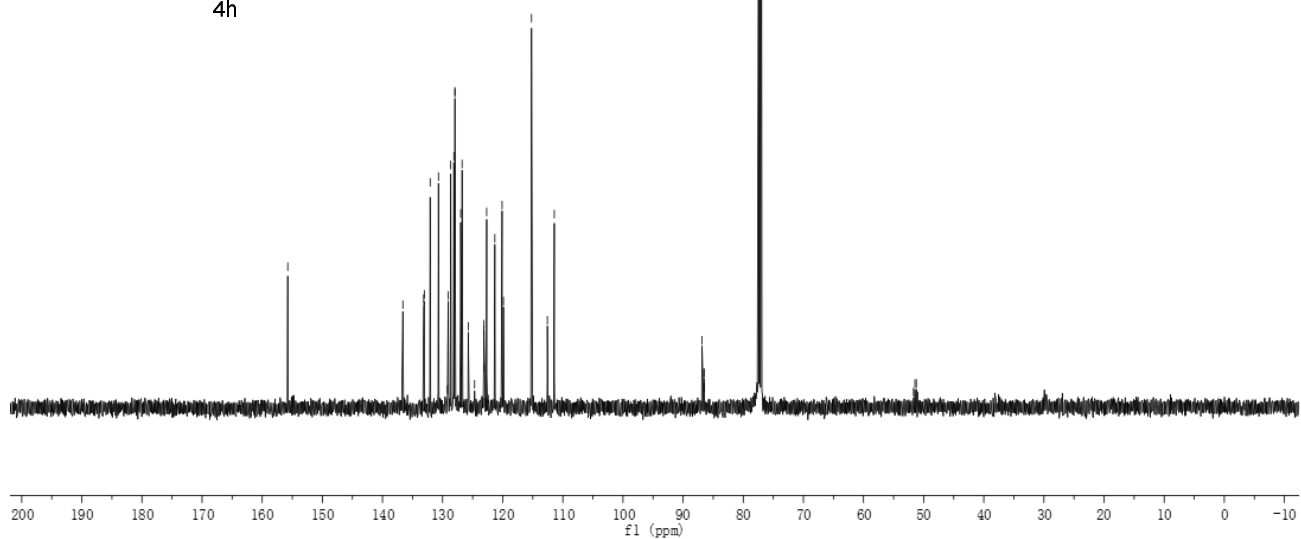

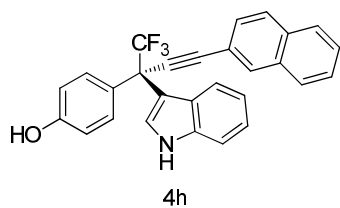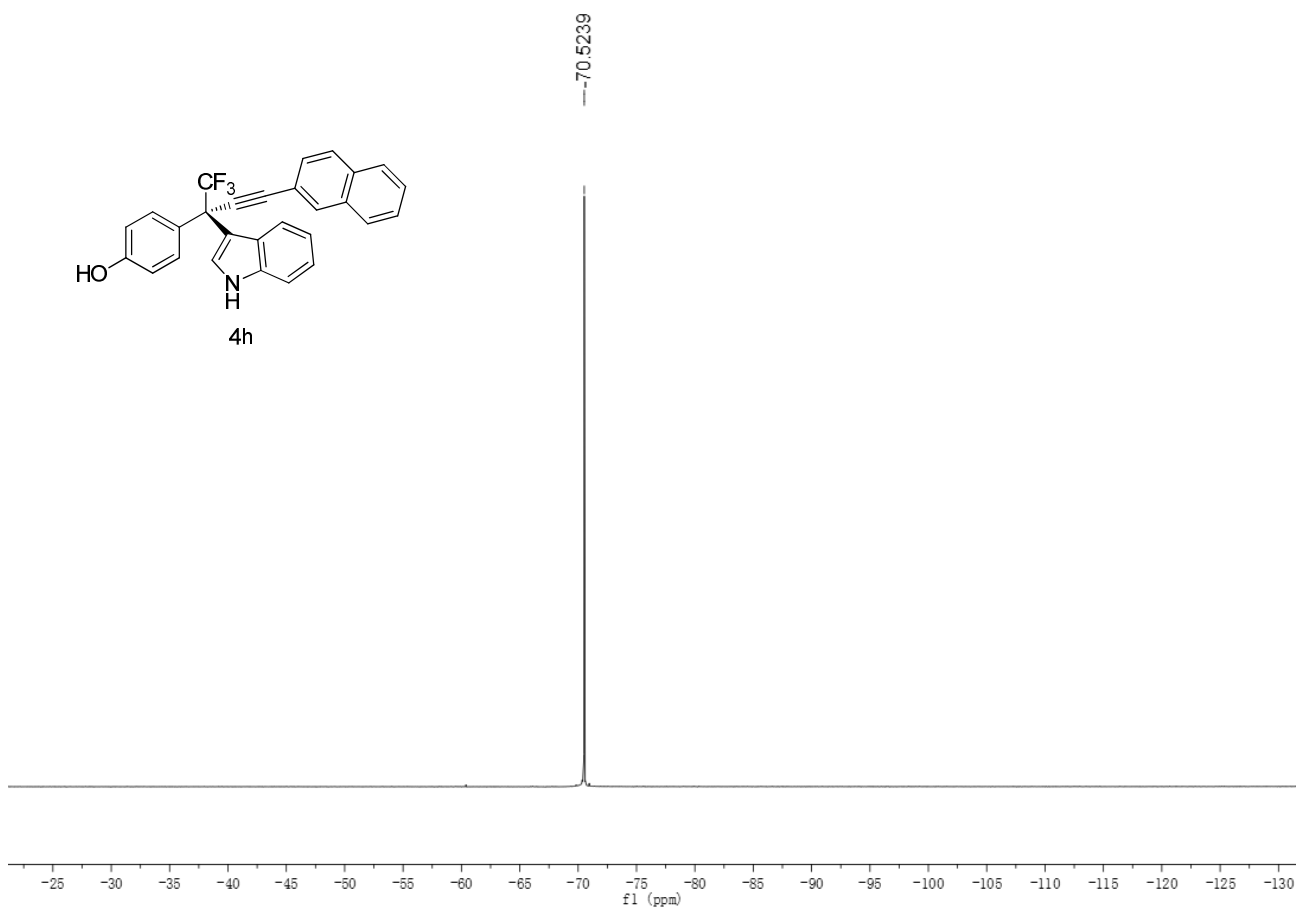

Chemical shift values (ppm):

- 8.1799
- 7.5212
- 7.5041
- 7.4734
- 7.4712
- 7.4675
- 7.4652
- 7.3846
- 7.3807
- 7.3745
- 7.3580
- 7.3281
- 7.3118
- 7.2507
- 7.2447
- 7.2407
- 7.2347
- 7.1858
- 7.1839
- 7.1715
- 7.1696
- 7.1554
- 7.1534
- 7.1341
- 7.1319
- 7.1241
- 7.1219
- 6.9923
- 6.9907
- 6.9763
- 6.9746
- 6.9620
- 6.9603
- 6.7706
- 6.7529

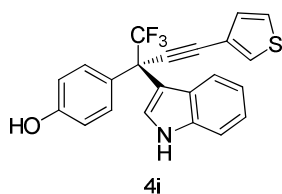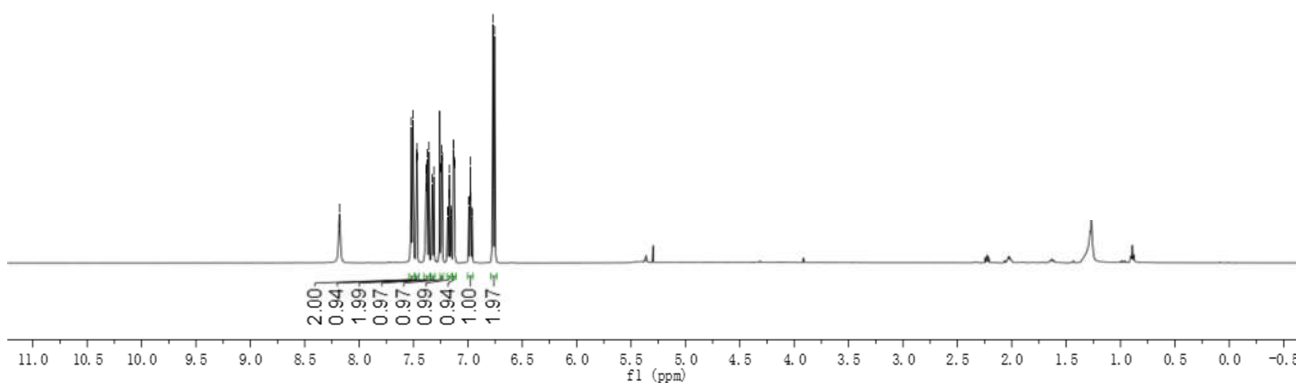

Integration values:

- 2.00
- 0.94
- 1.99
- 0.97
- 0.99
- 0.94
- 1.00
- 1.97

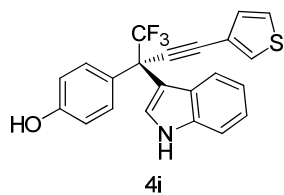

155.7731

136.5722

130.1953

123.0415

120.0491

115.1729

112.5402

111.3901

85.8229

85.8102

81.7321

51.6043

51.3690

51.1367

50.9038

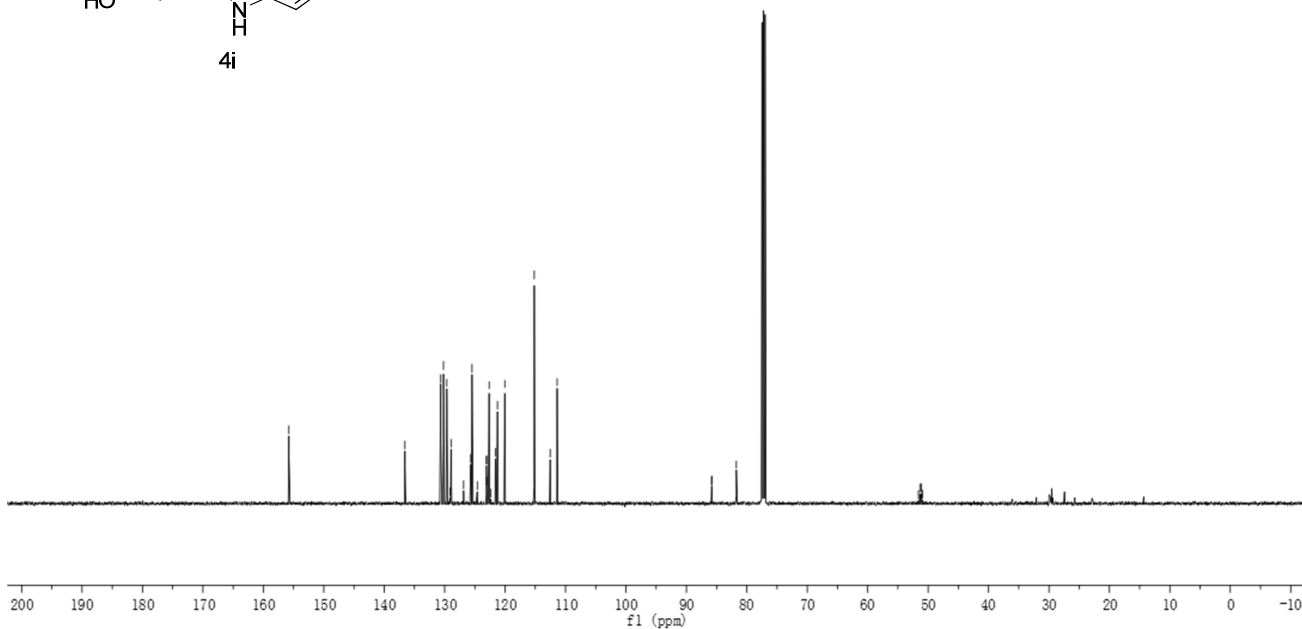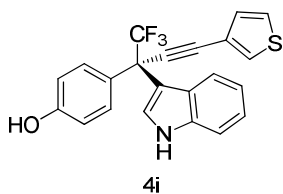

70.5933

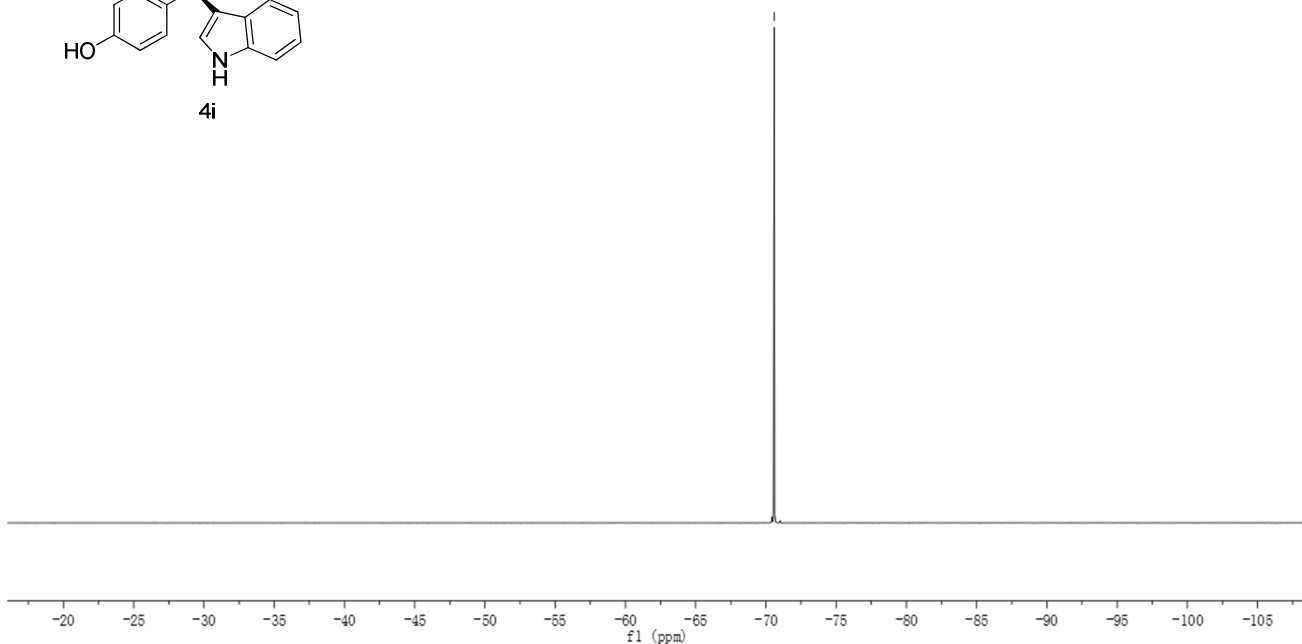

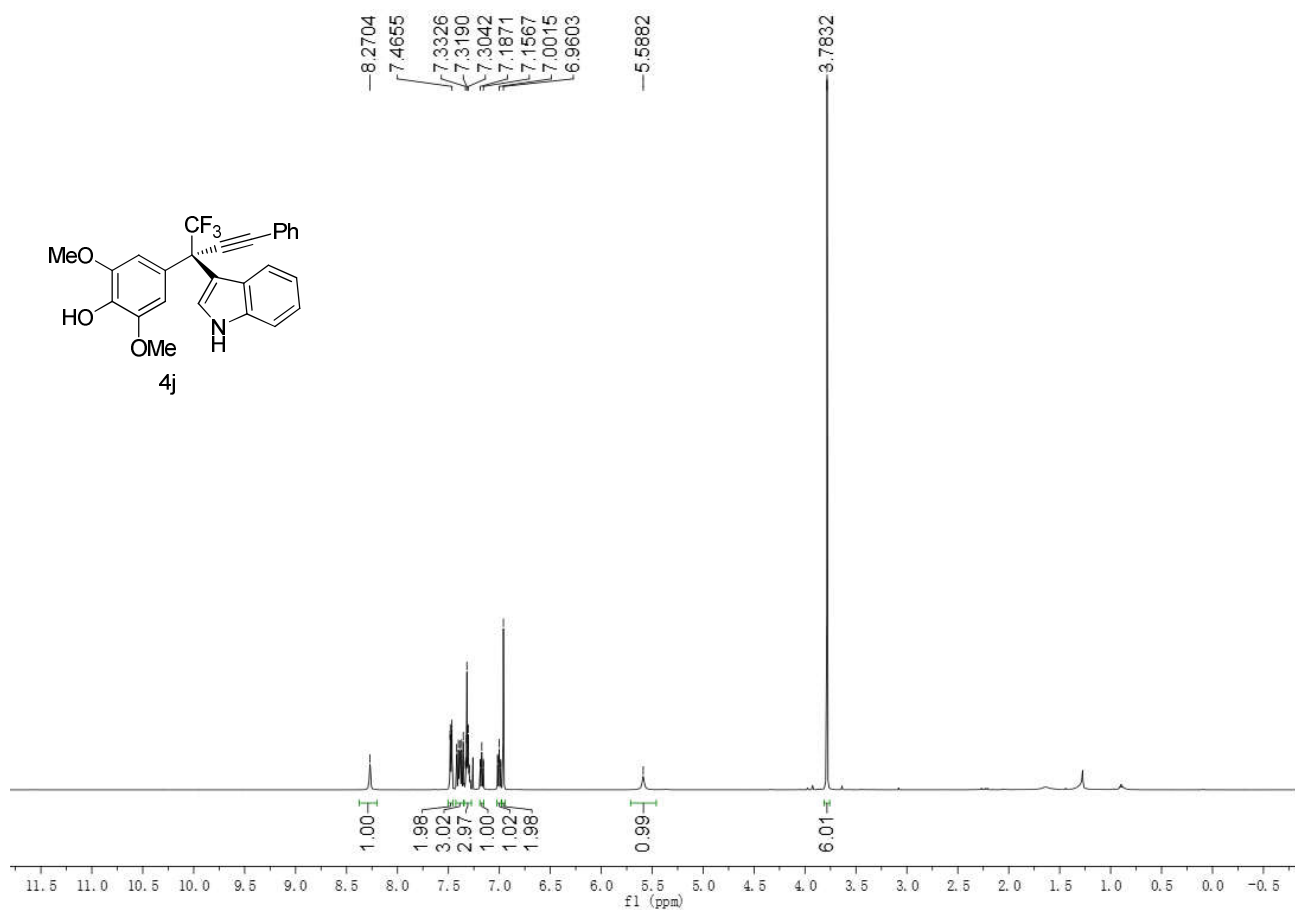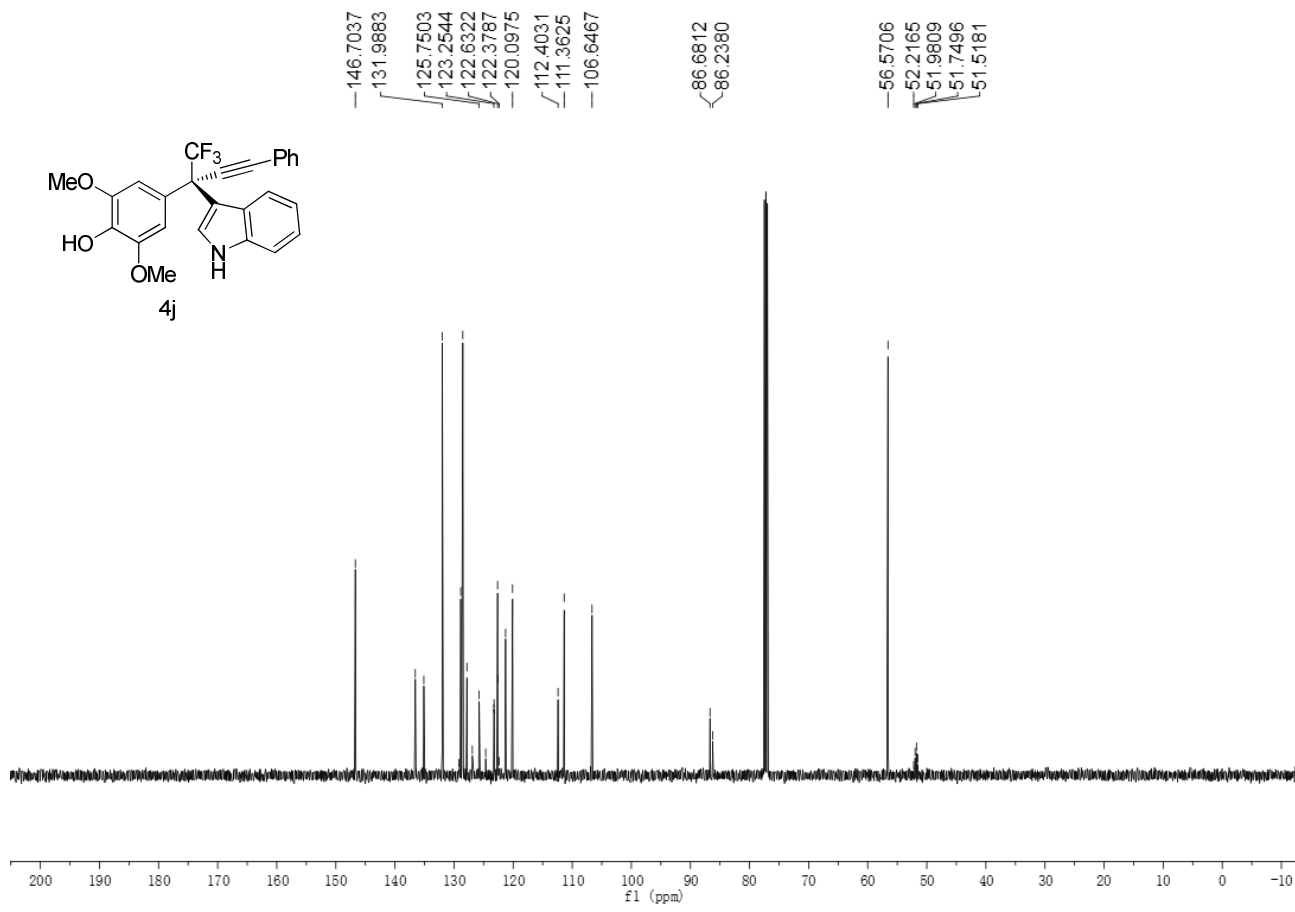

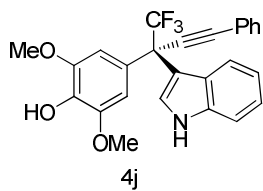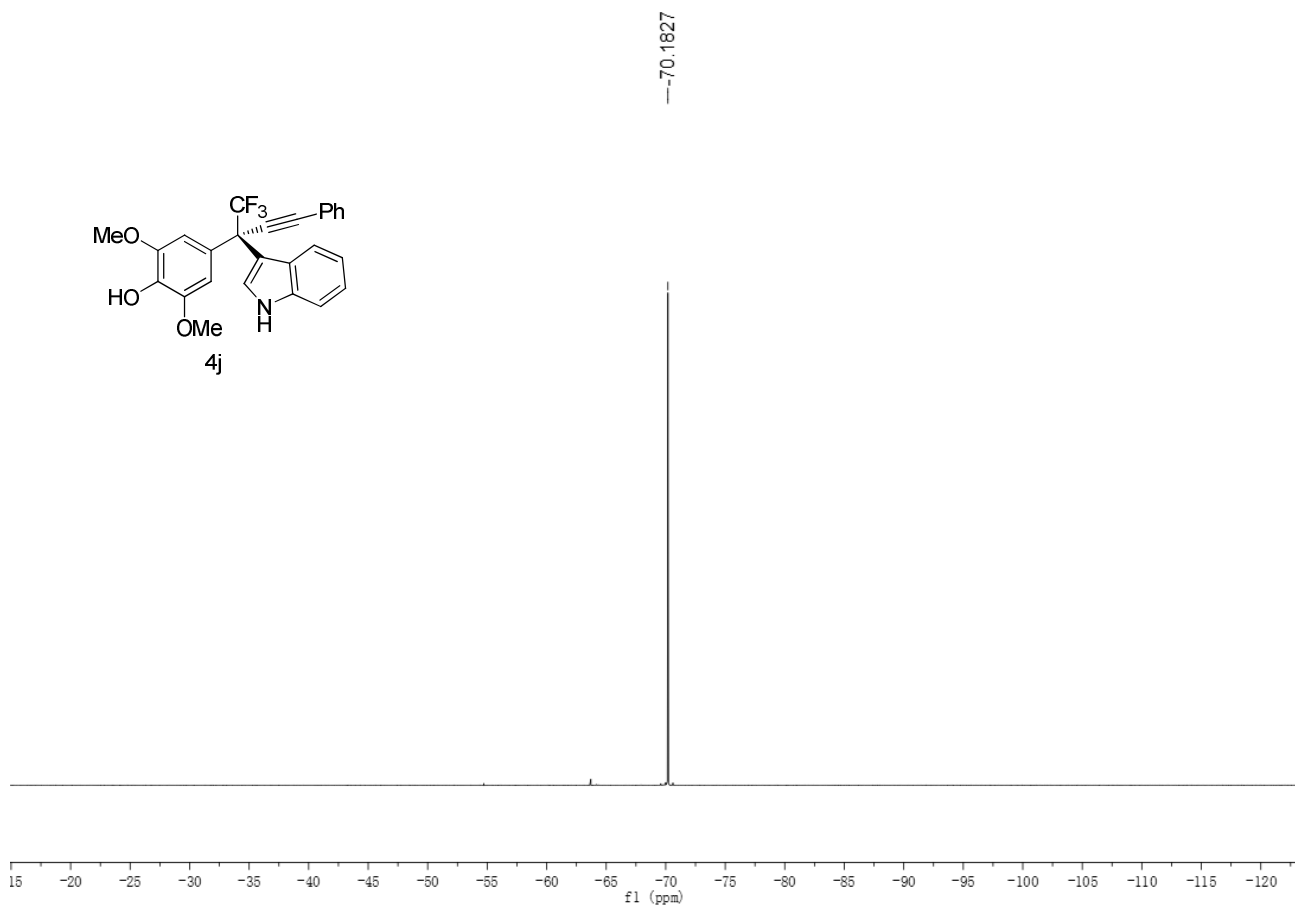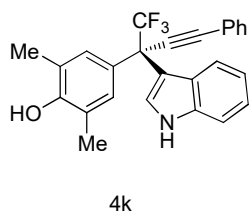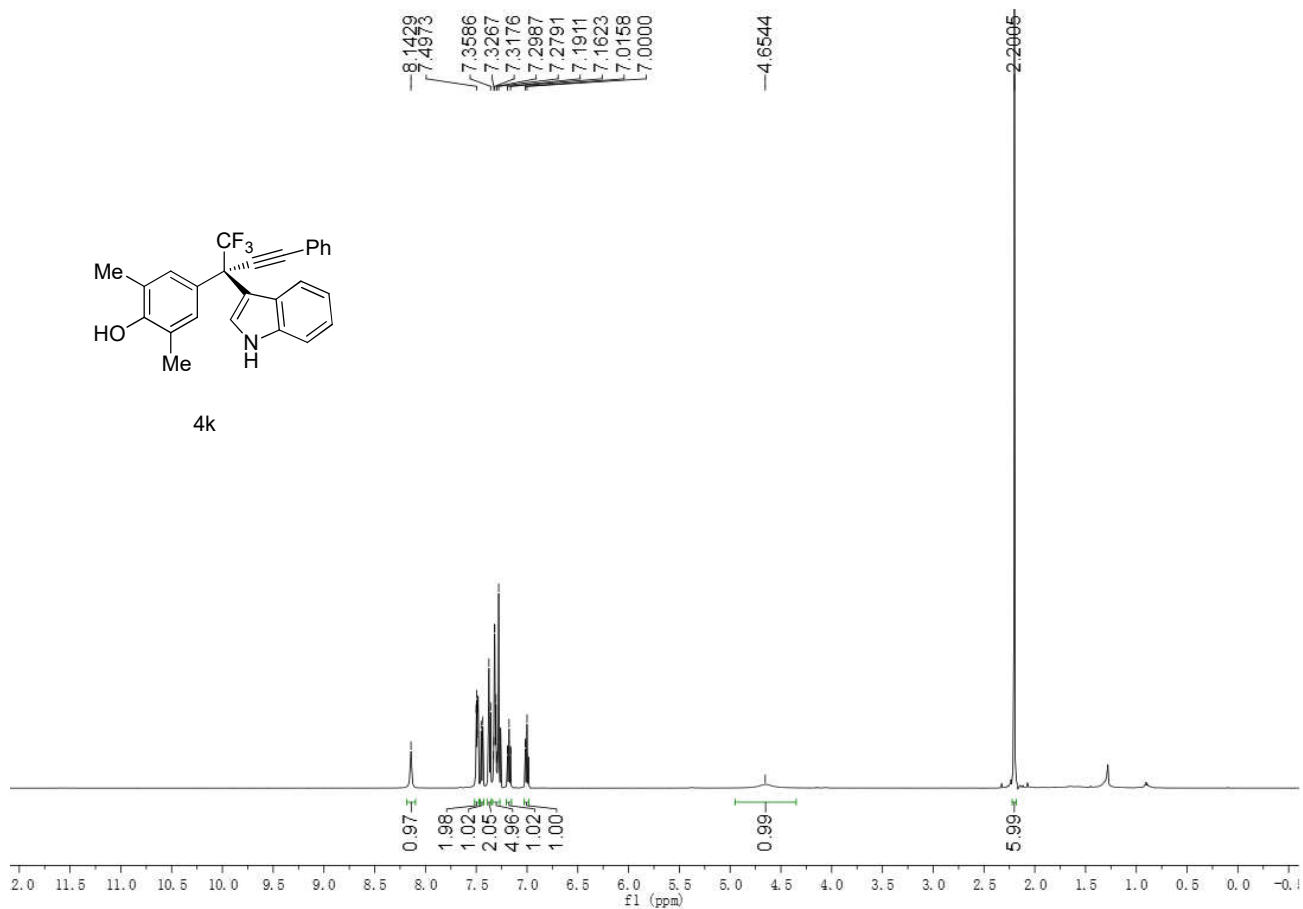



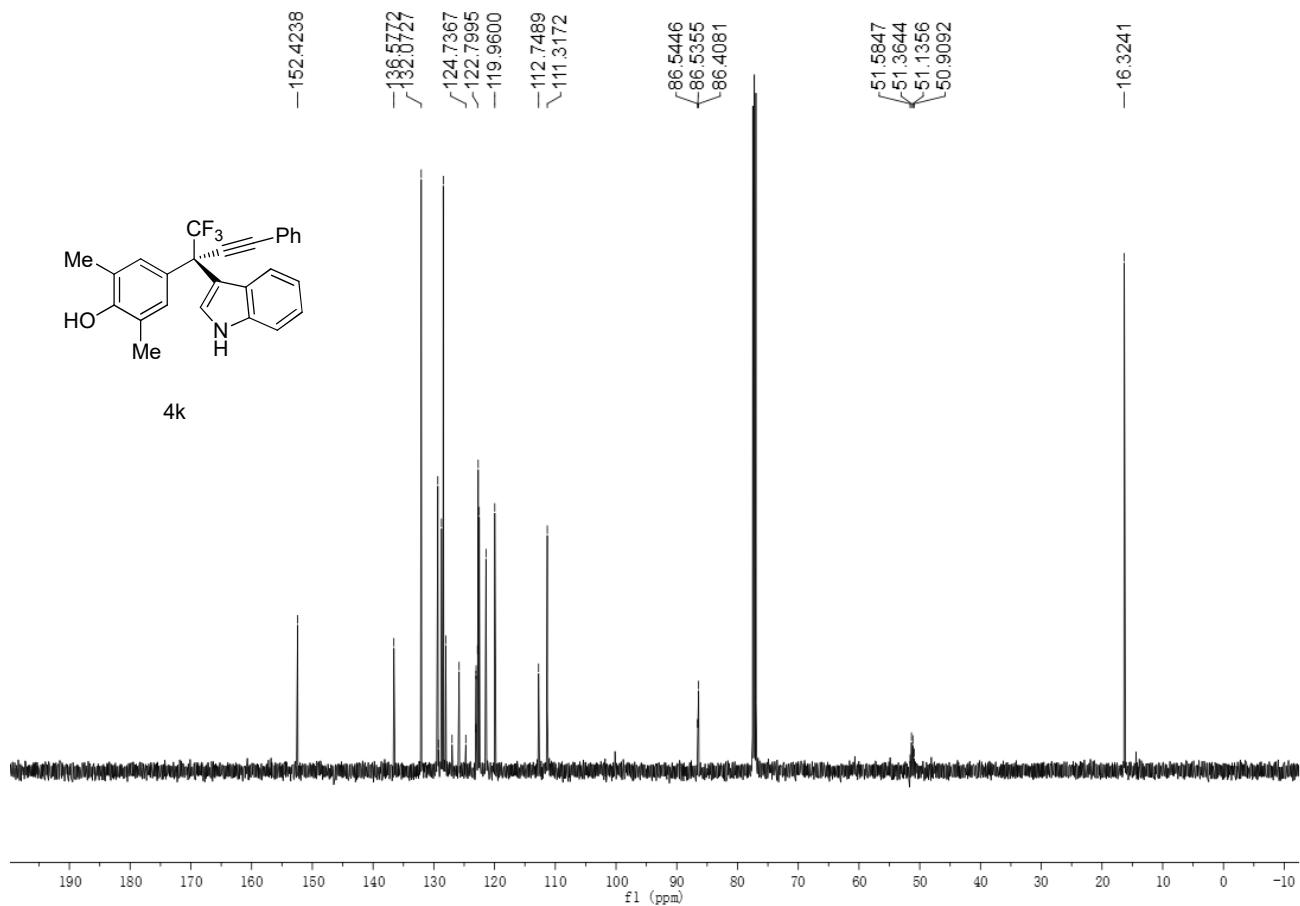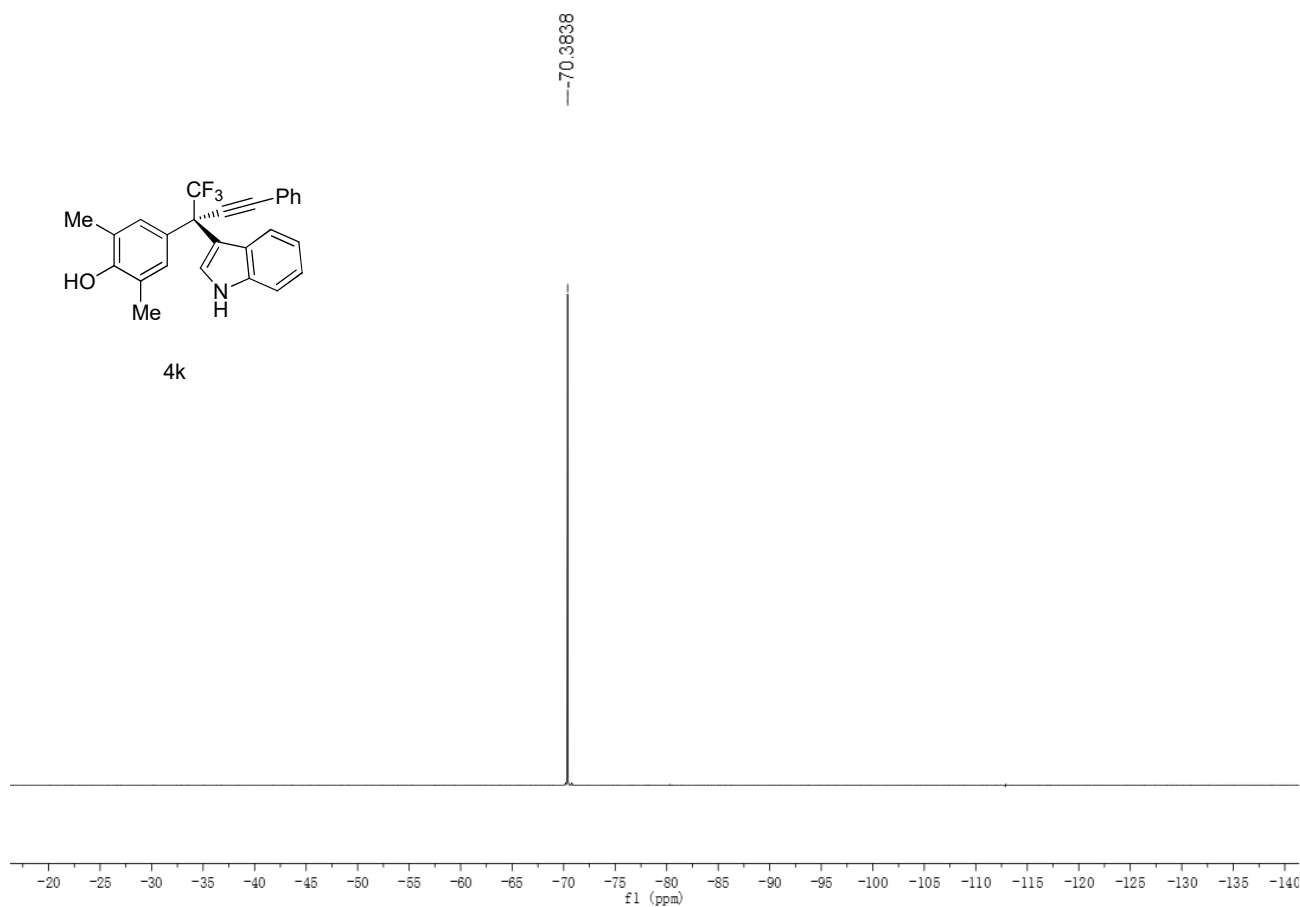

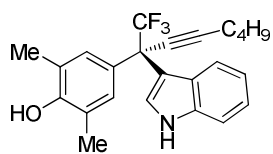

4I

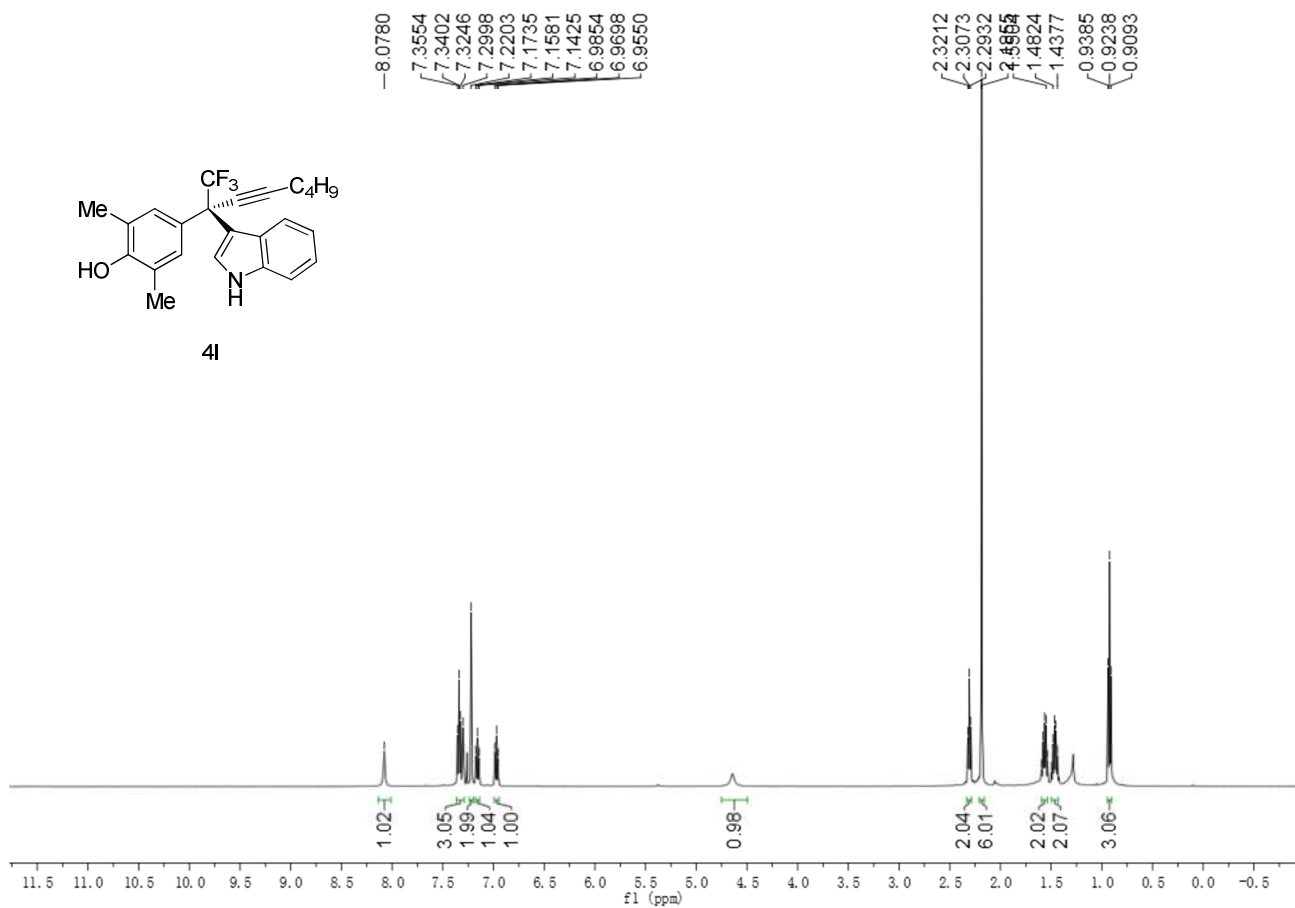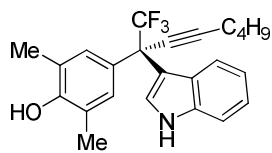

4I

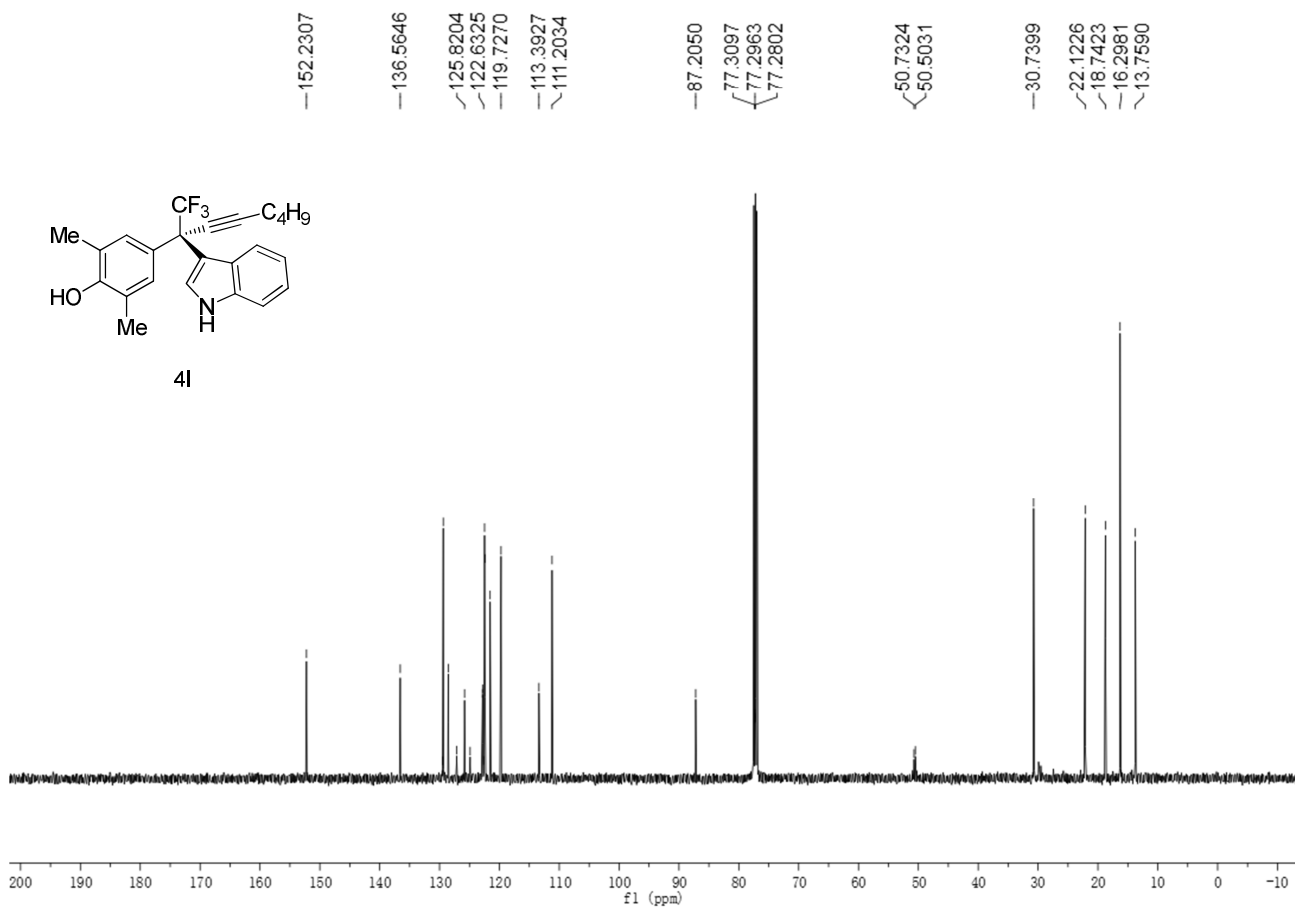

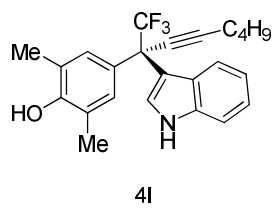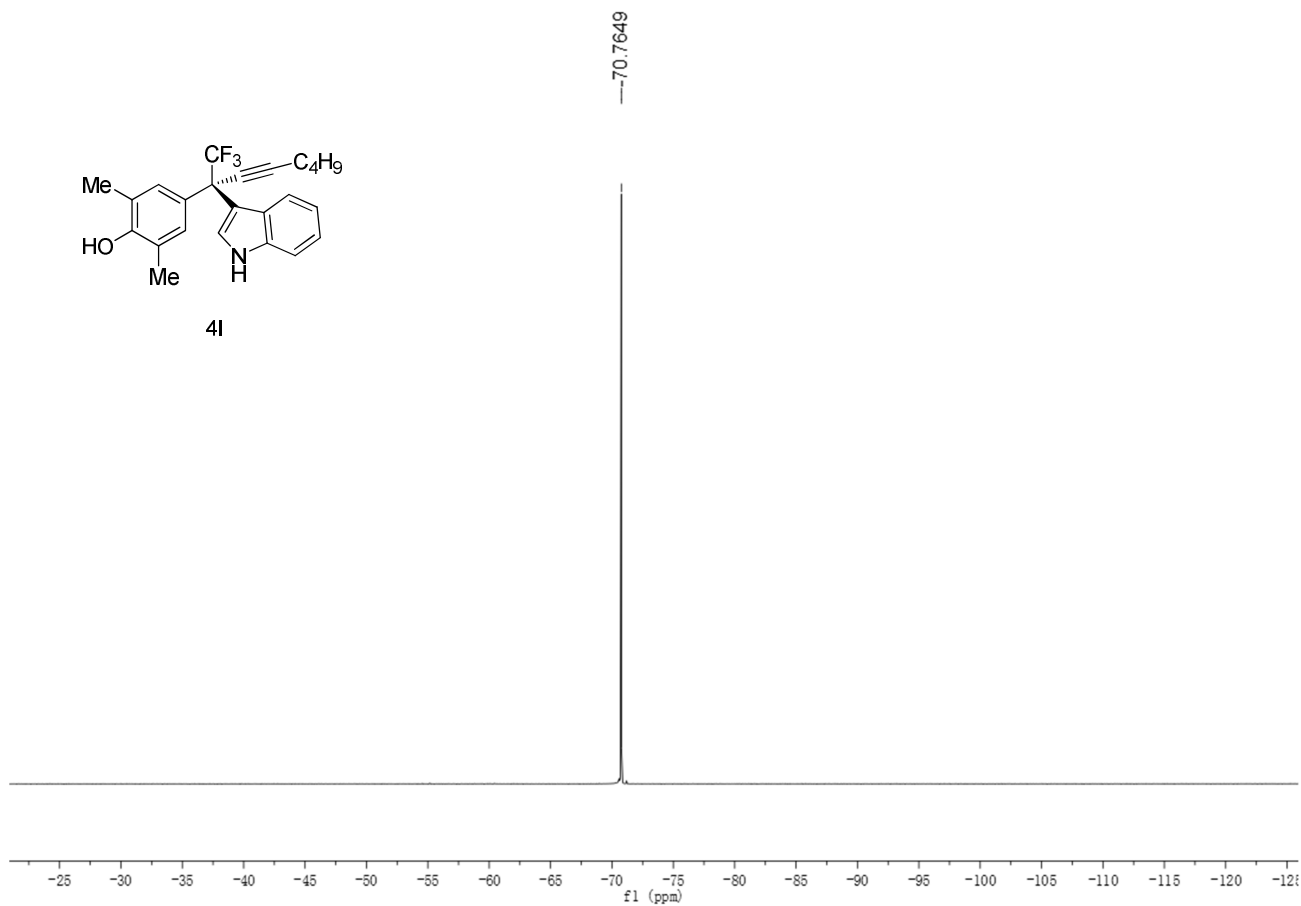

Chemical shift values (ppm):

- 8.0697
- 7.3380
- 7.3220
- 7.2997
- 7.2246
- 7.1741
- 7.1724
- 7.1579
- 7.1439
- 7.1419
- 6.9838
- 6.9821
- 6.9680
- 6.9534
- 6.9520
- 2.3176
- 2.3150
- 2.3034
- 2.3014
- 2.2891
- 2.1866
- 1.4648
- 1.3228
- 1.2758
- 0.9055
- 0.8916
- 0.8839
- 0.8776

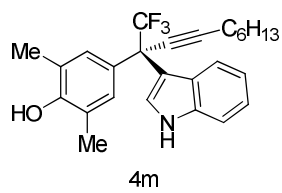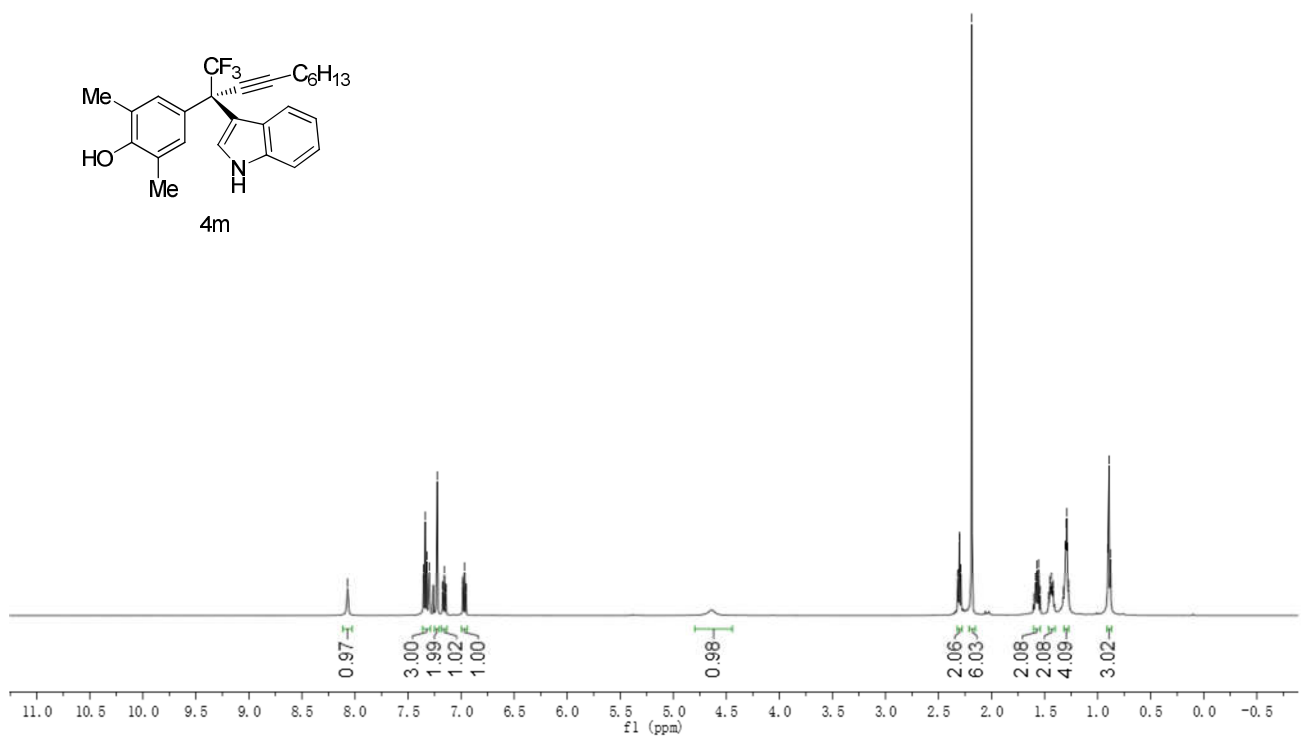

Integration values:

- 0.97
- 3.00
- 1.99
- 1.02
- 1.00
- 0.98
- 2.06
- 6.03
- 2.08
- 2.08
- 4.09
- 3.02

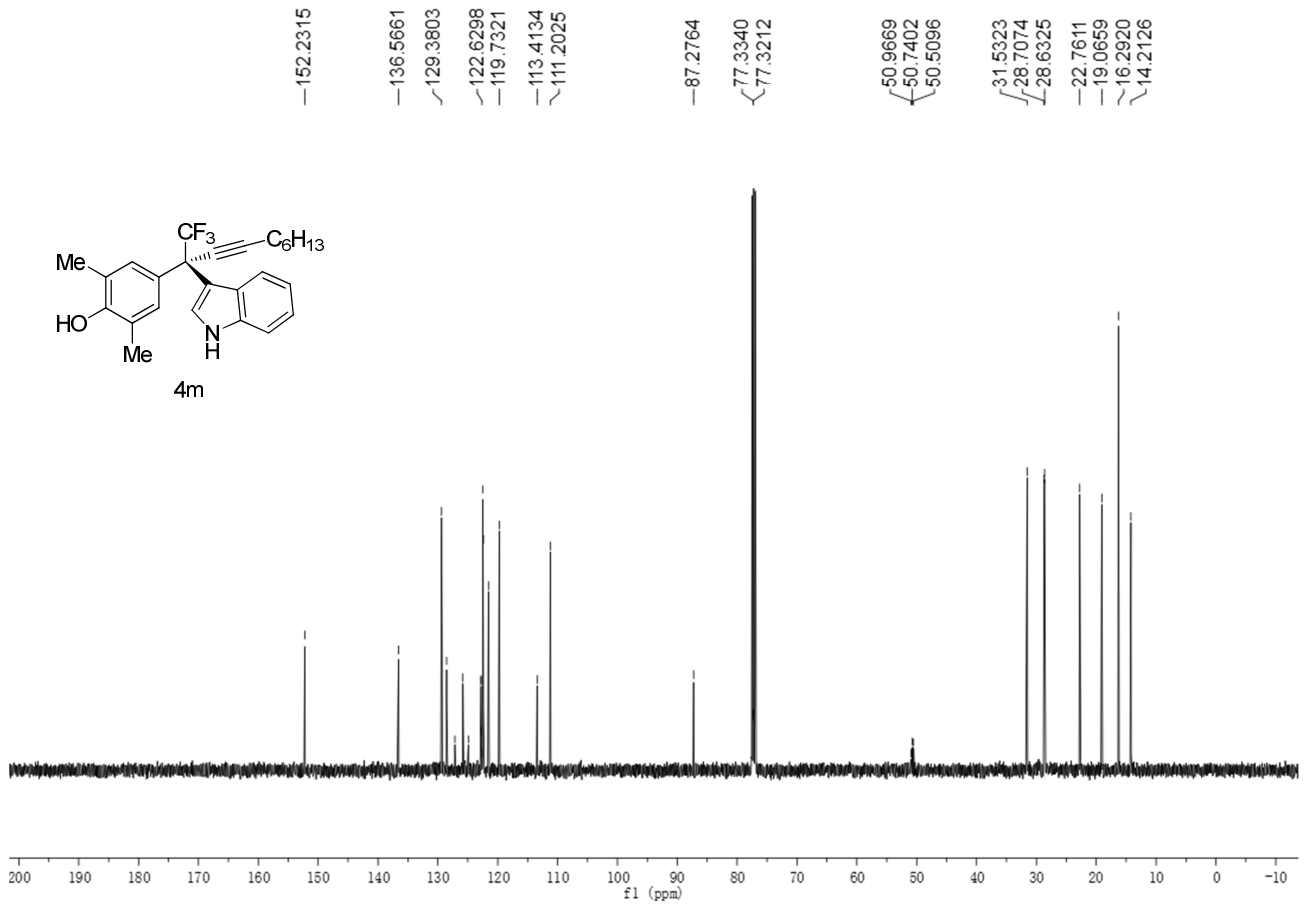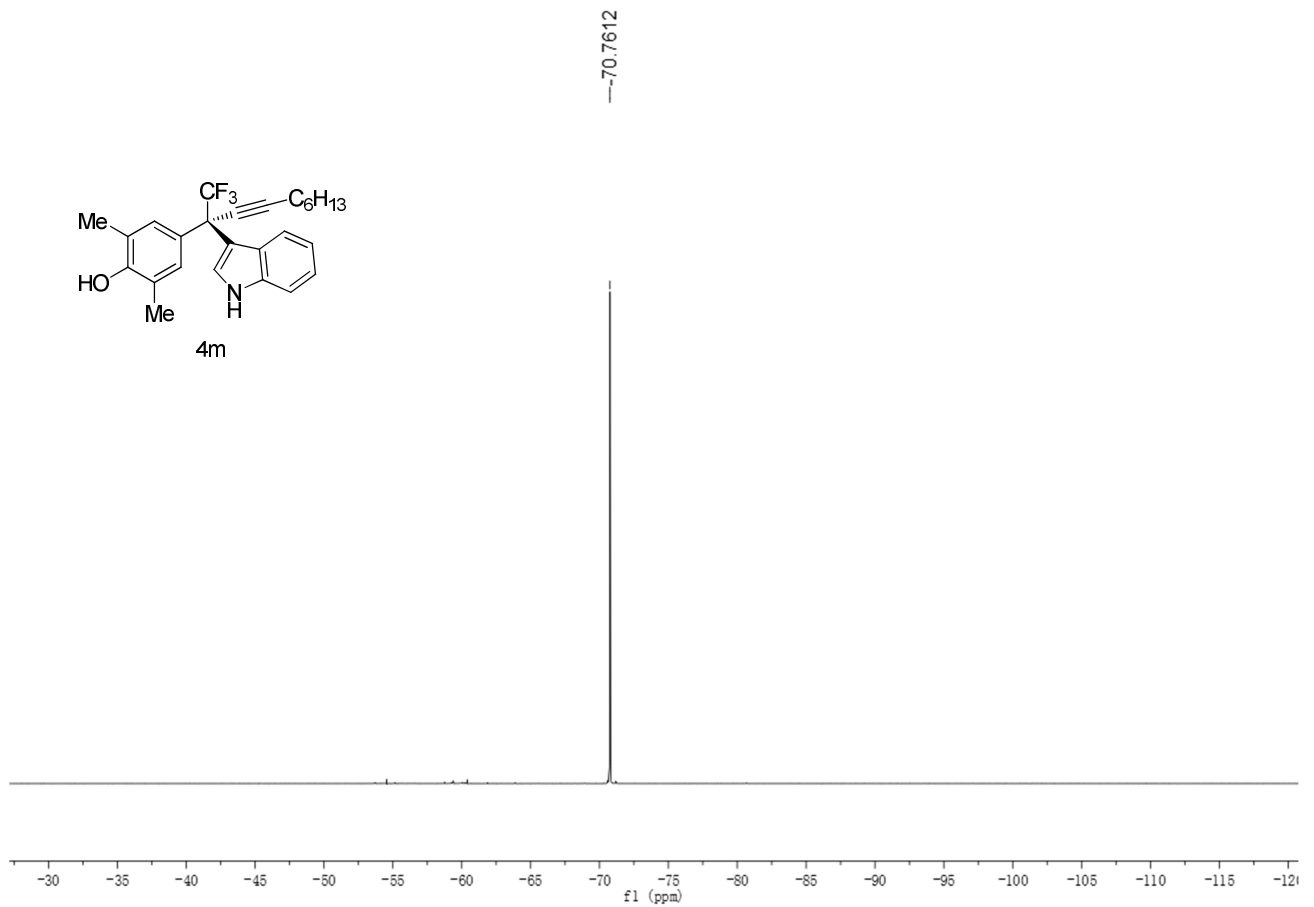

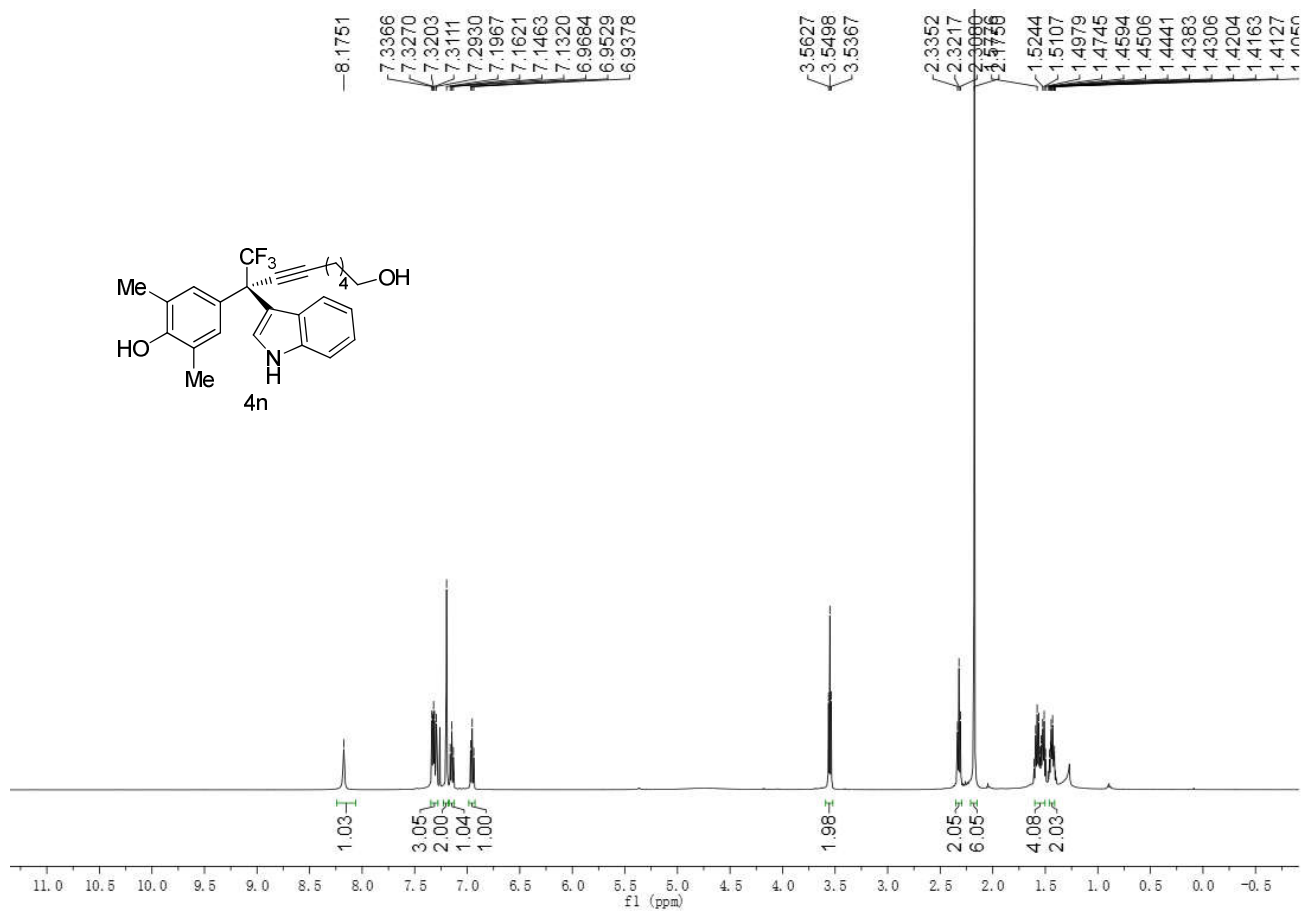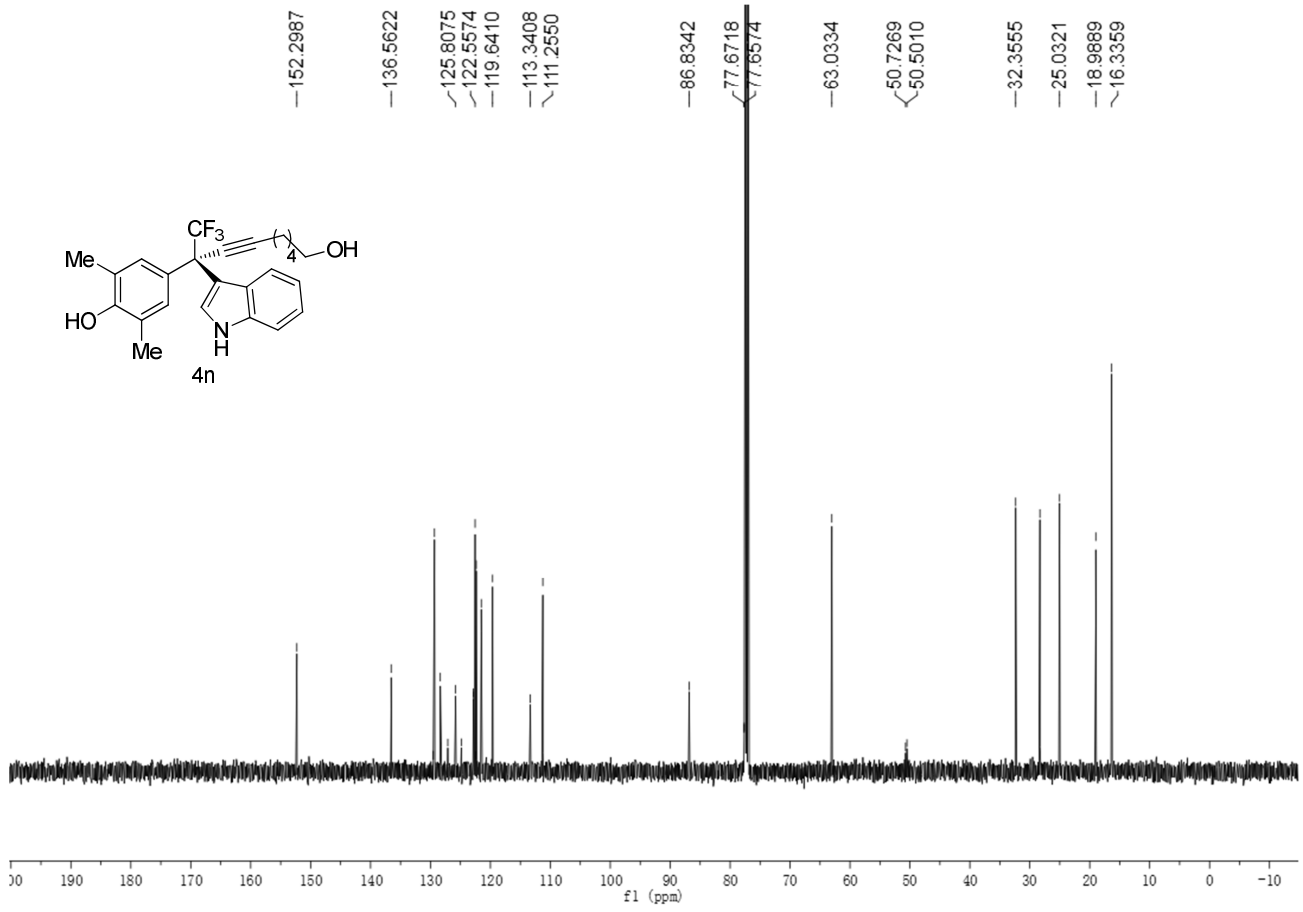

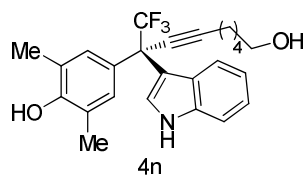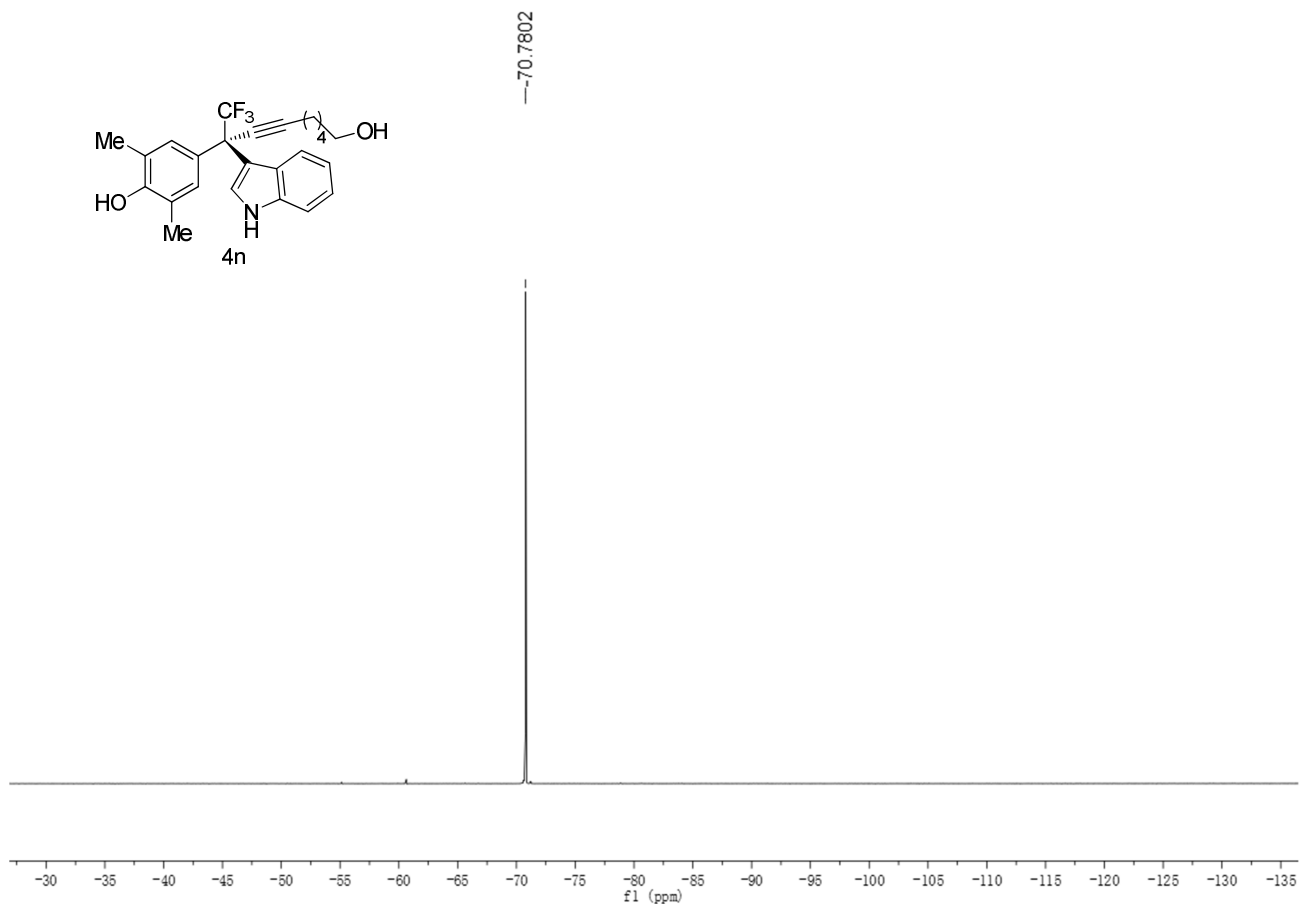

Chemical shift values (ppm):  
 -8.1198  
 7.1925  
 7.1827  
 7.1684  
 7.1664  
 7.0145  
 7.0127  
 7.0002  
 6.9984  
 6.9966  
 6.9842  
 6.9824  
 4.2246  
 4.2192  
 2.1922

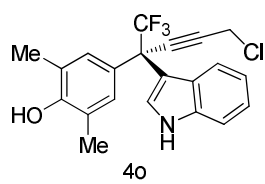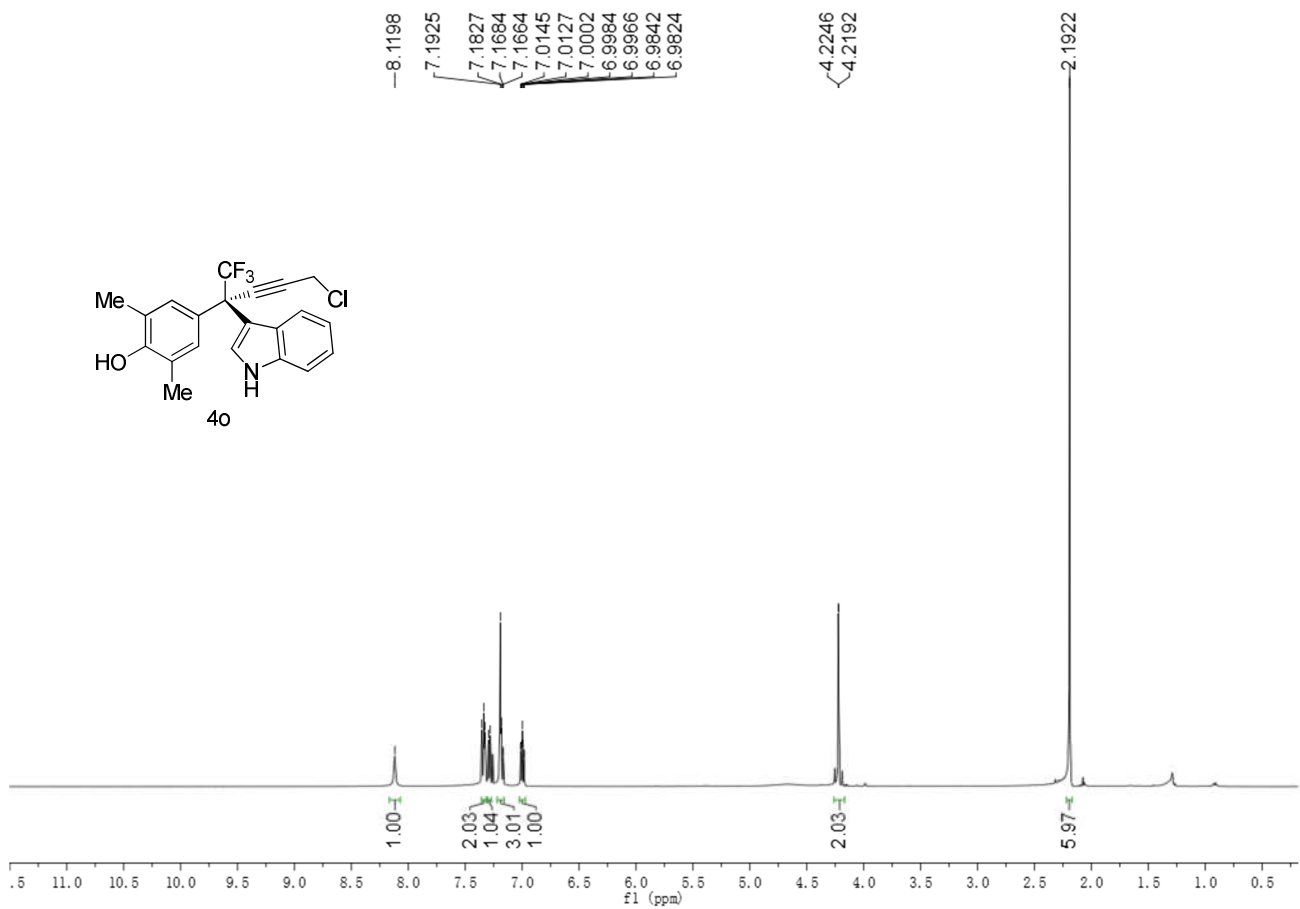

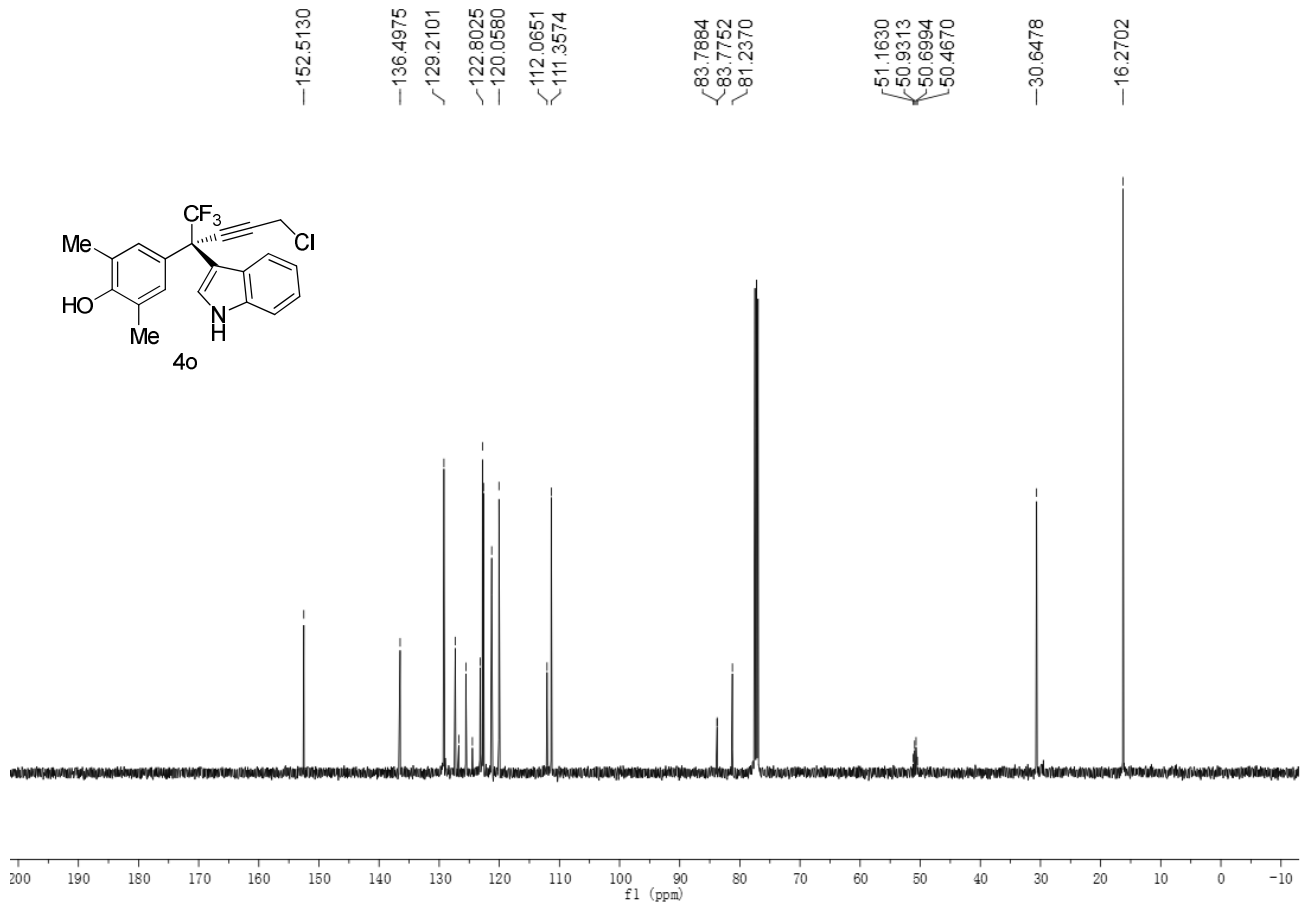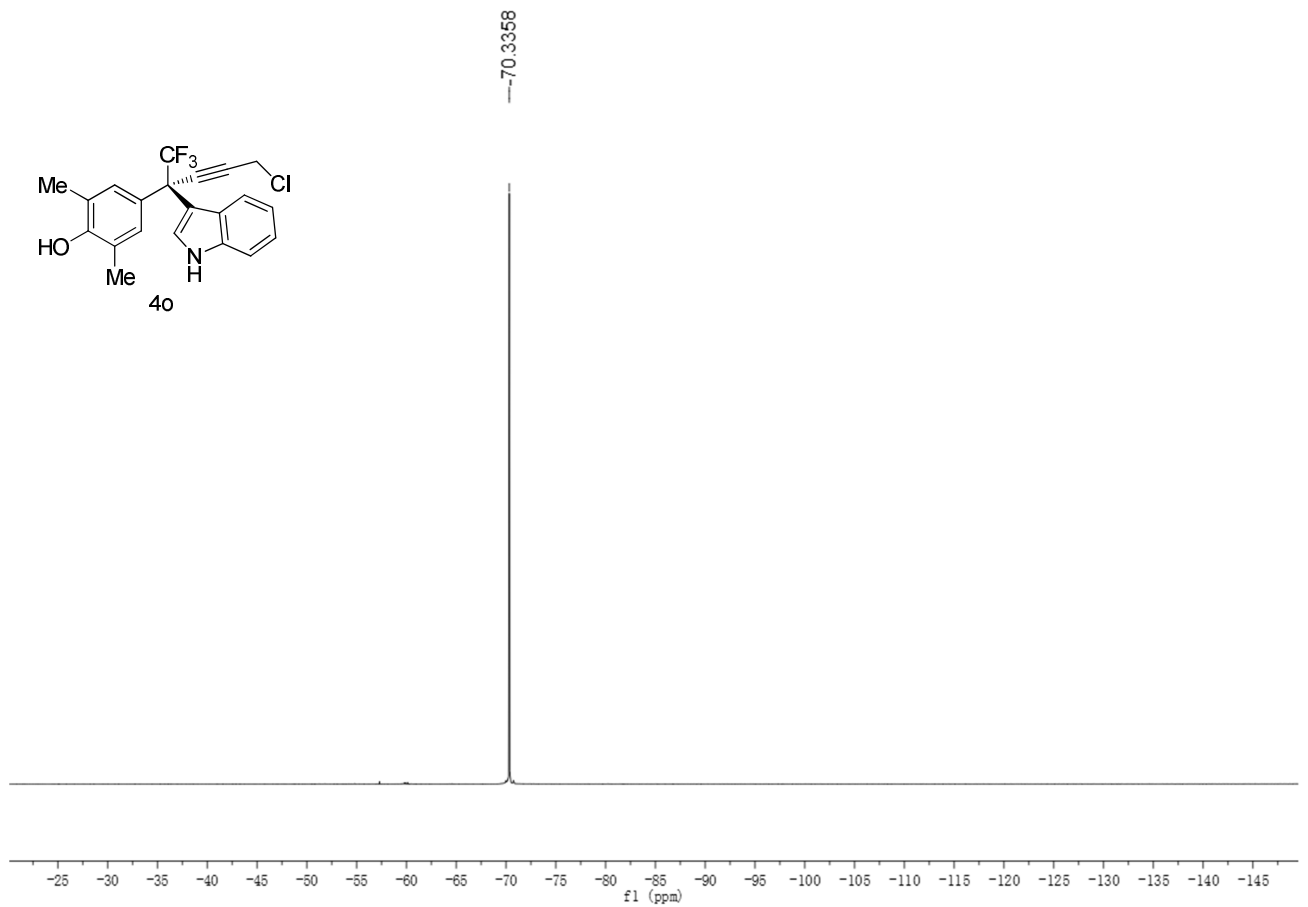

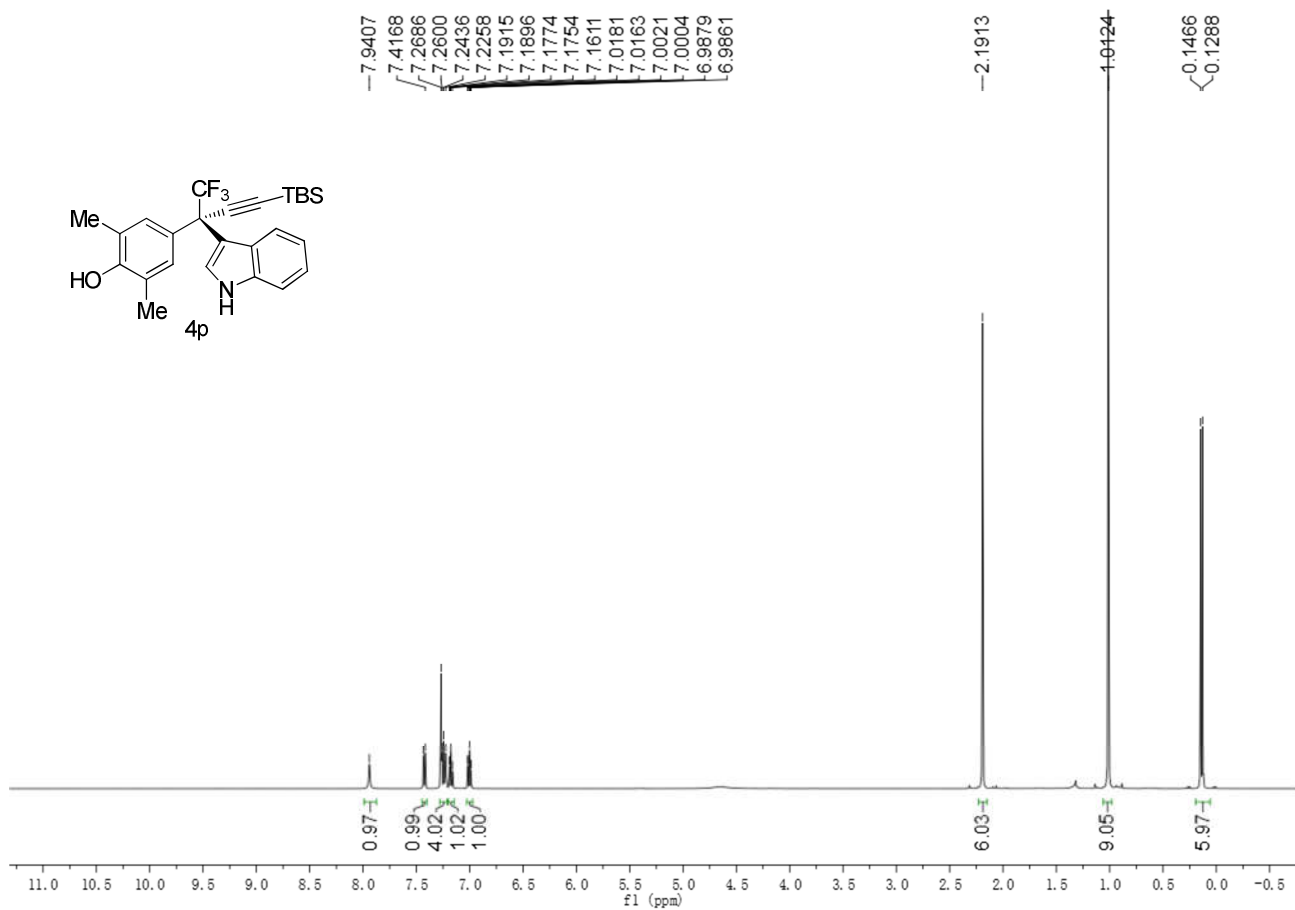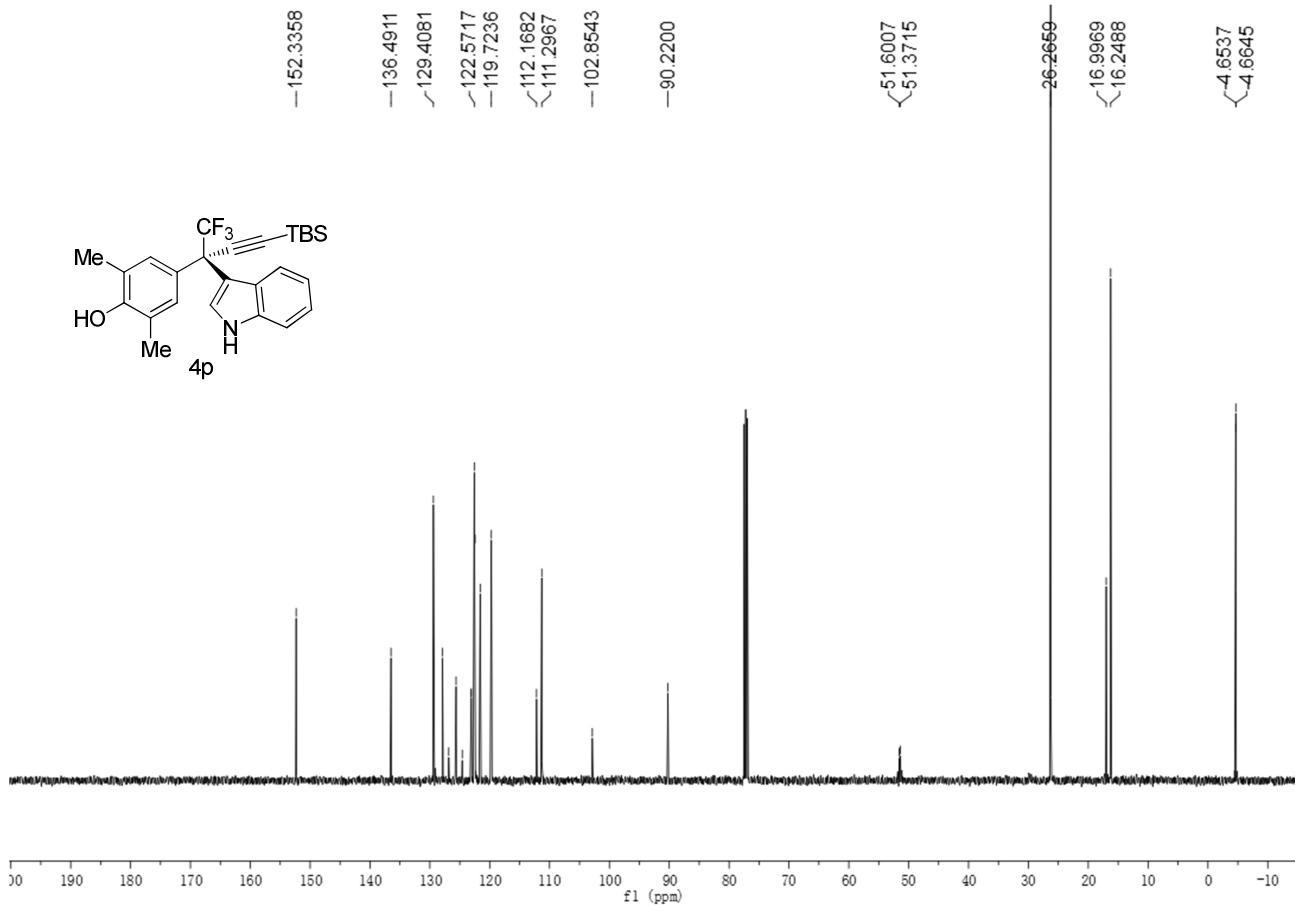



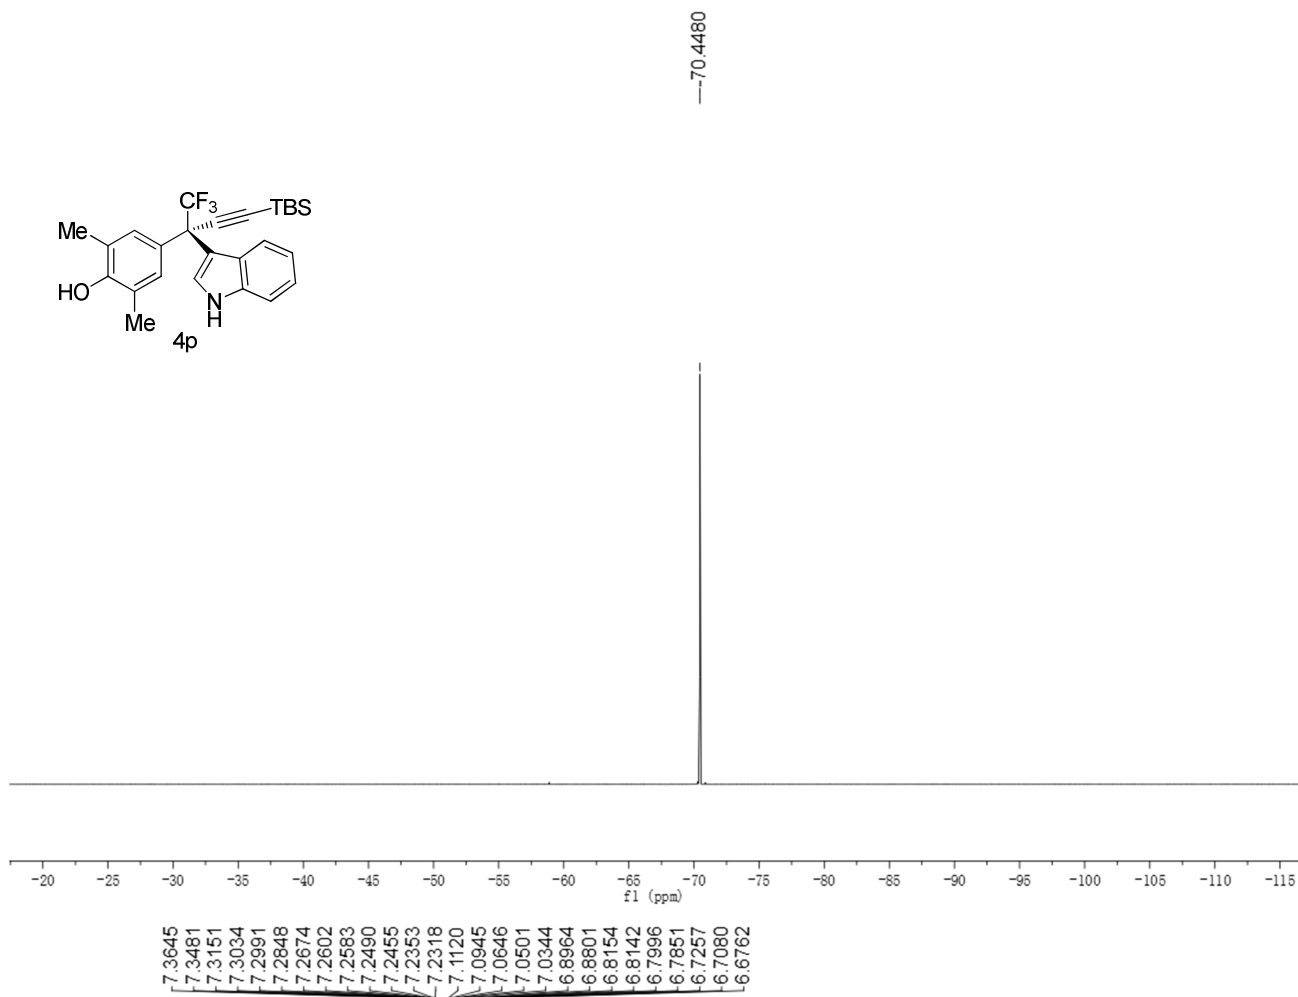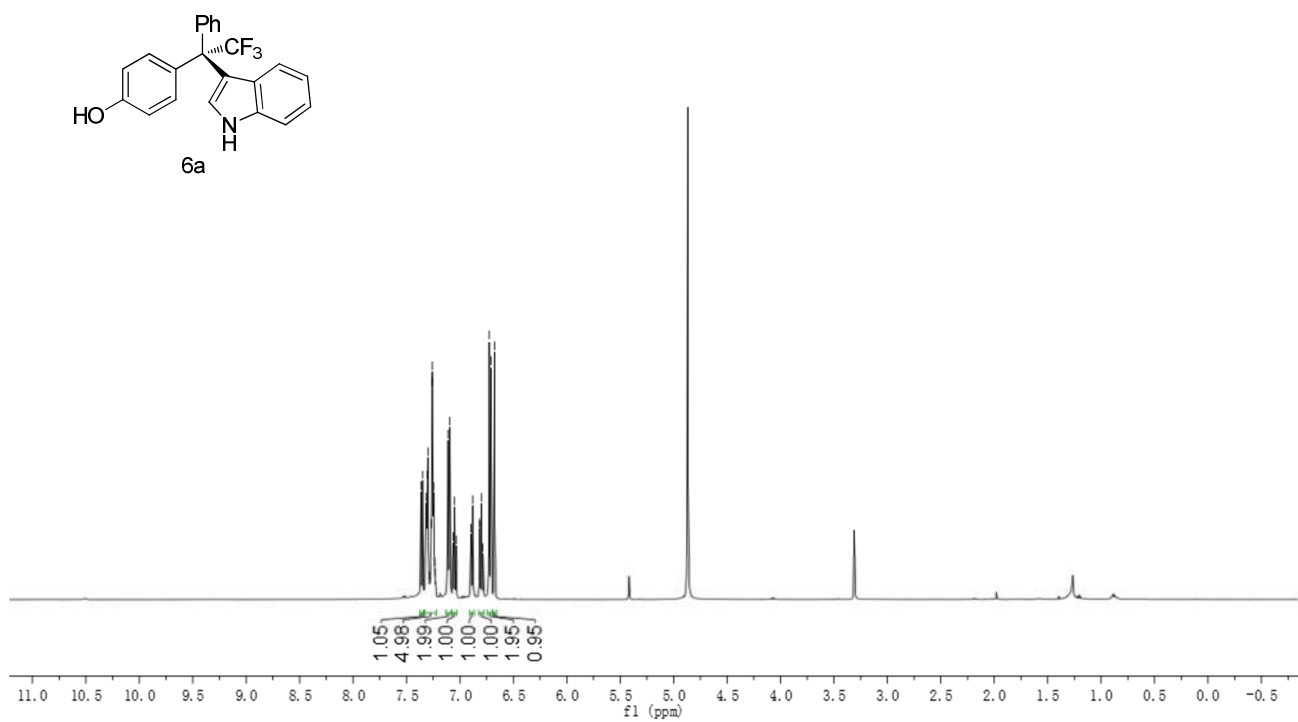

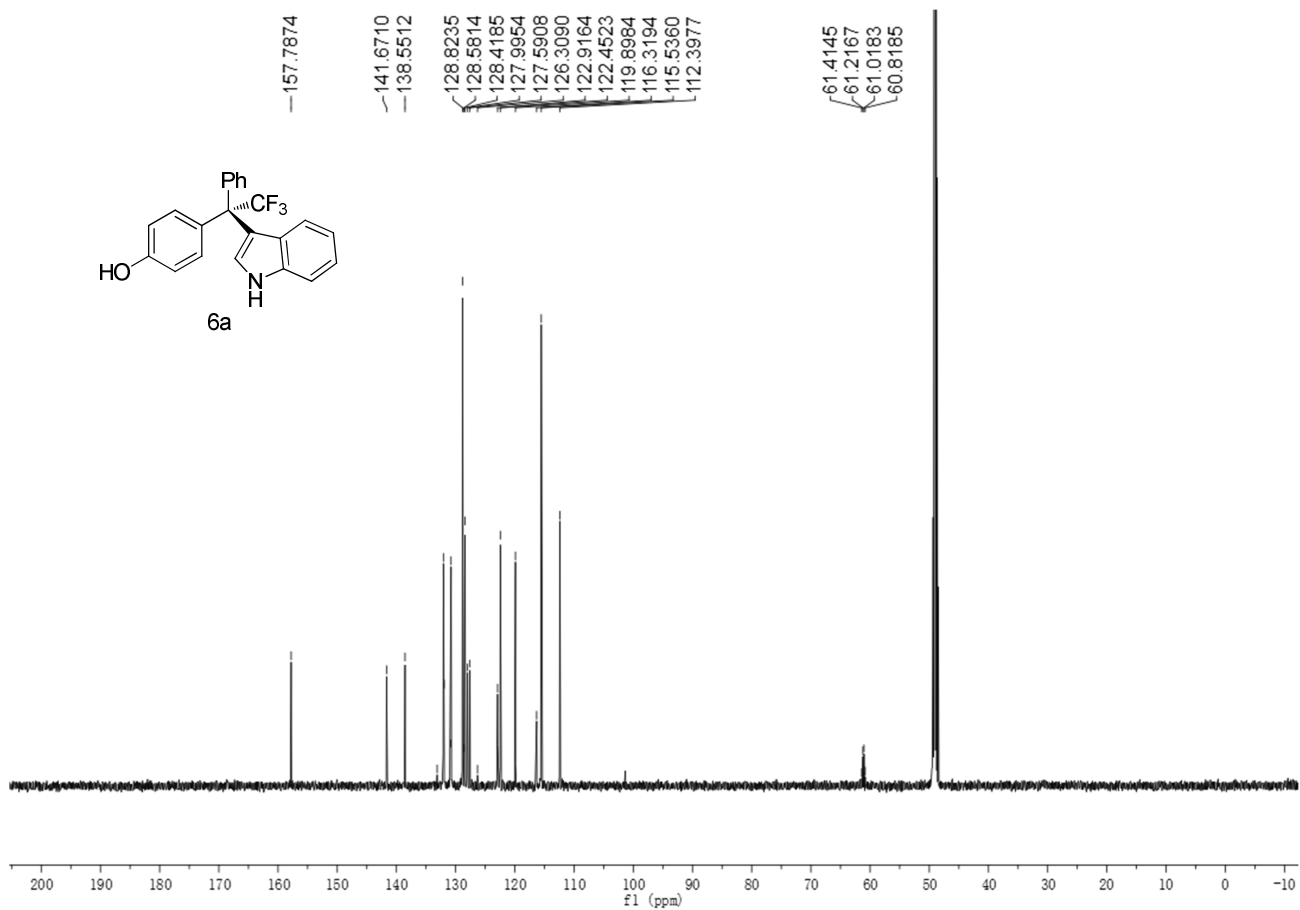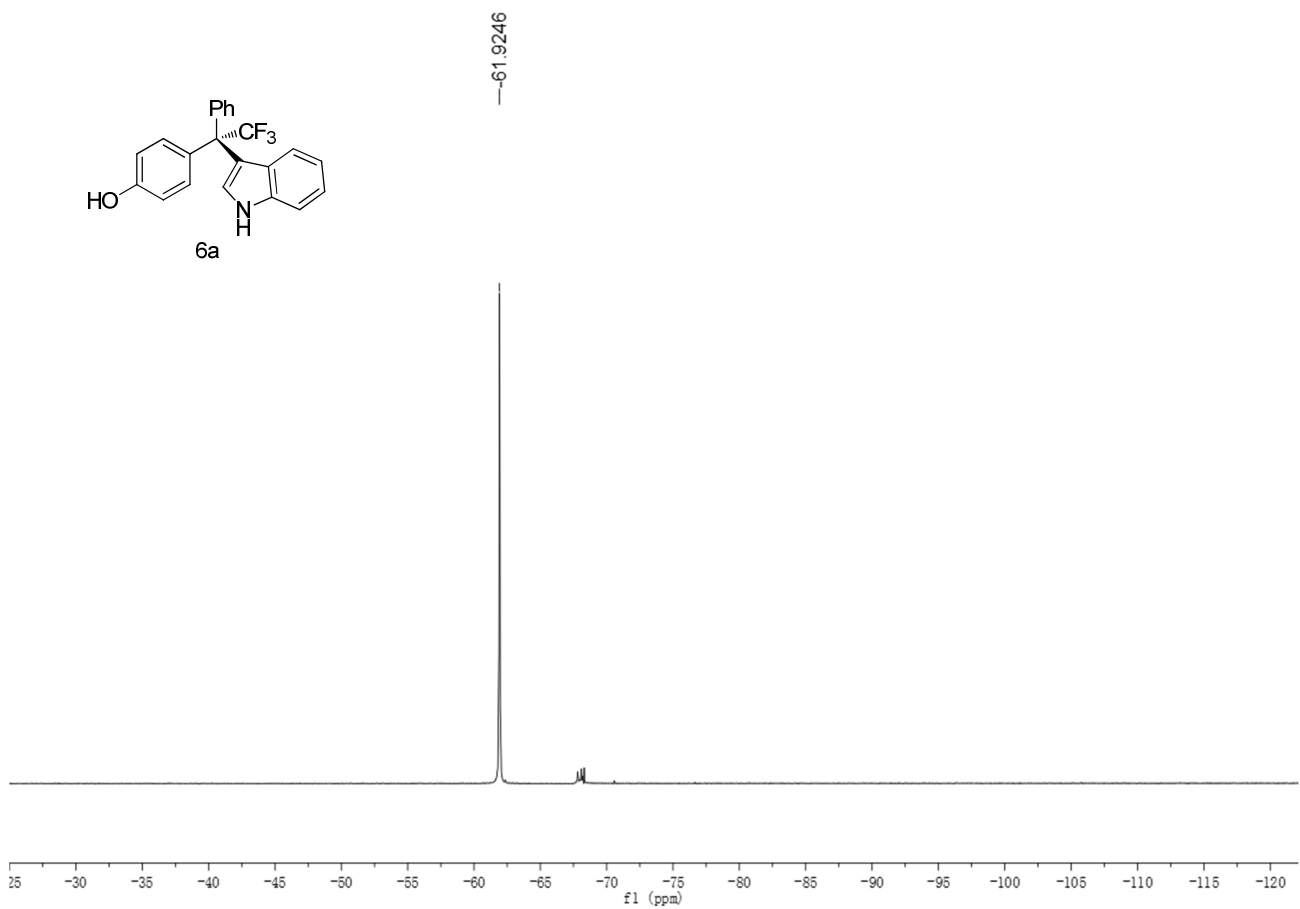

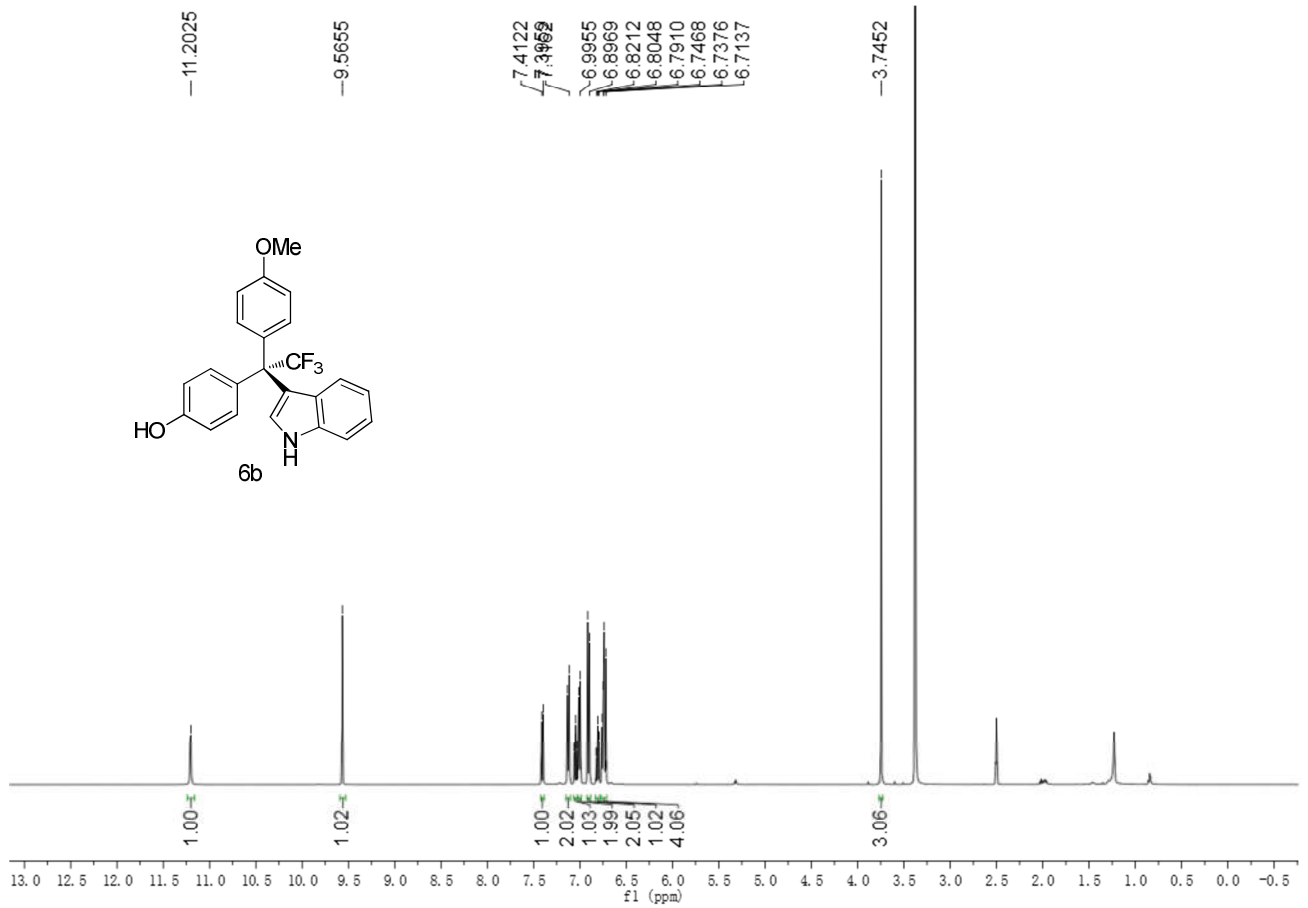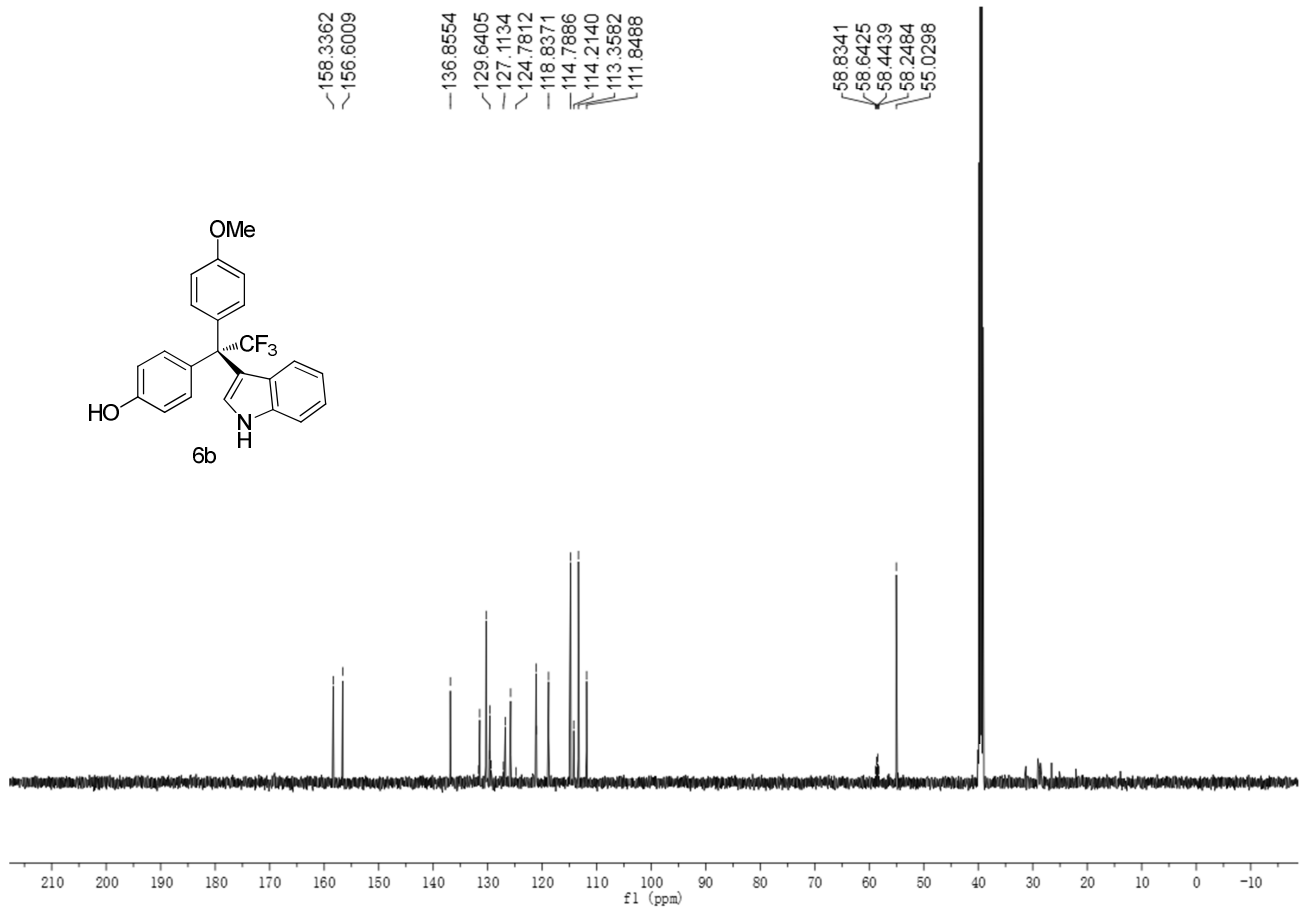

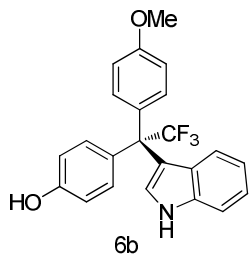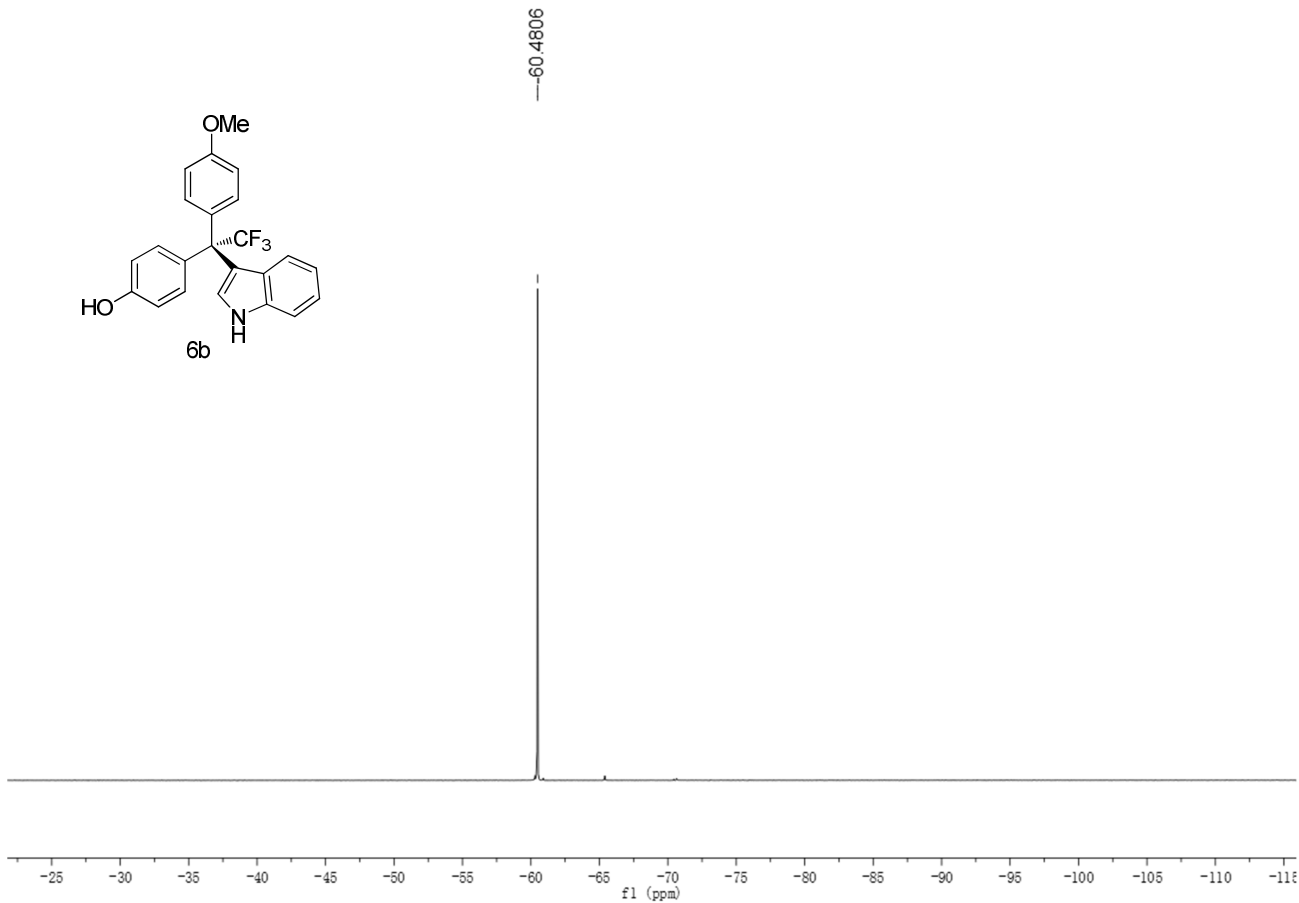

7.3560  
7.3397  
7.1764  
7.1600  
7.1021  
7.0852  
7.0788  
7.0623  
7.0571  
7.0454  
7.0431  
7.0265  
6.8983  
6.8838  
6.8073  
6.7916  
6.7769  
6.7110  
6.7083  
6.6934  
6.6905  
6.6730  
6.6708

2.2987  
2.2888

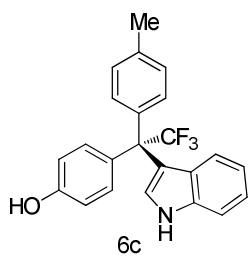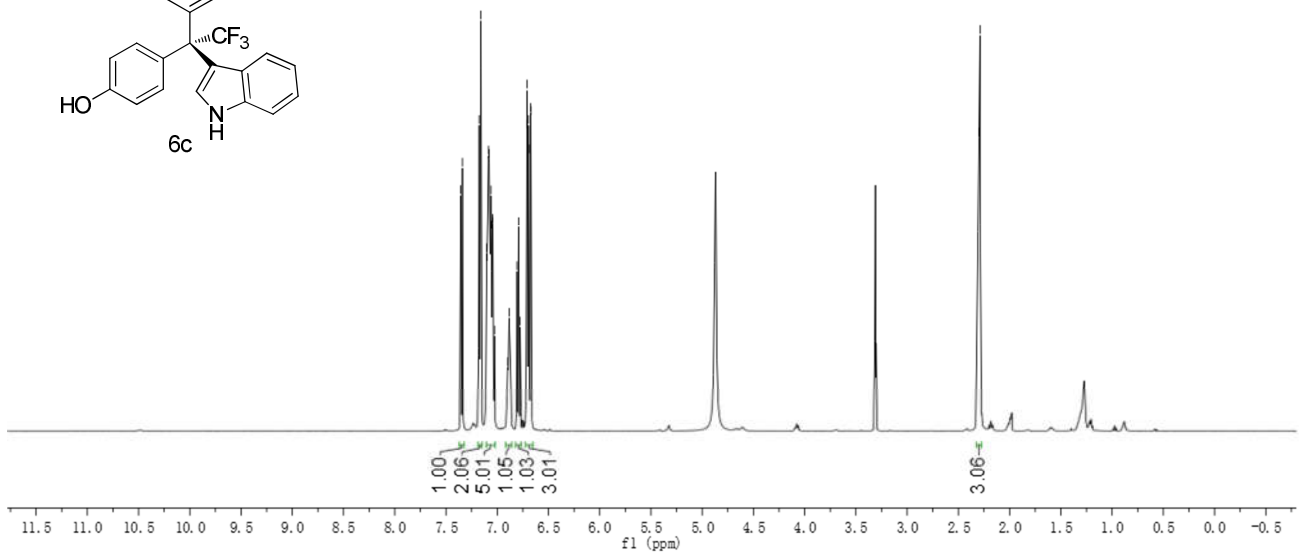

1.00  
2.06  
5.01  
1.05  
1.03  
3.01

3.06

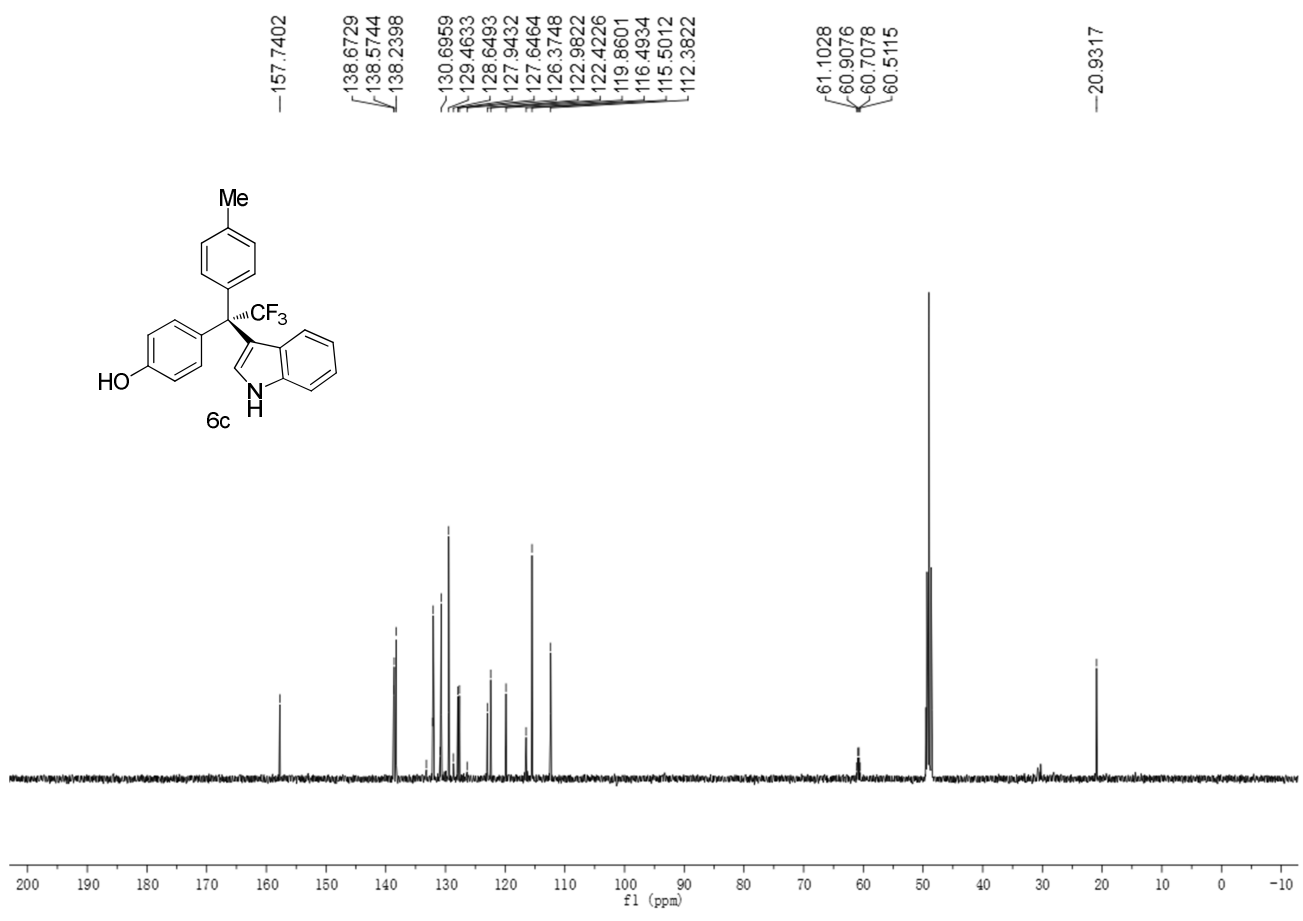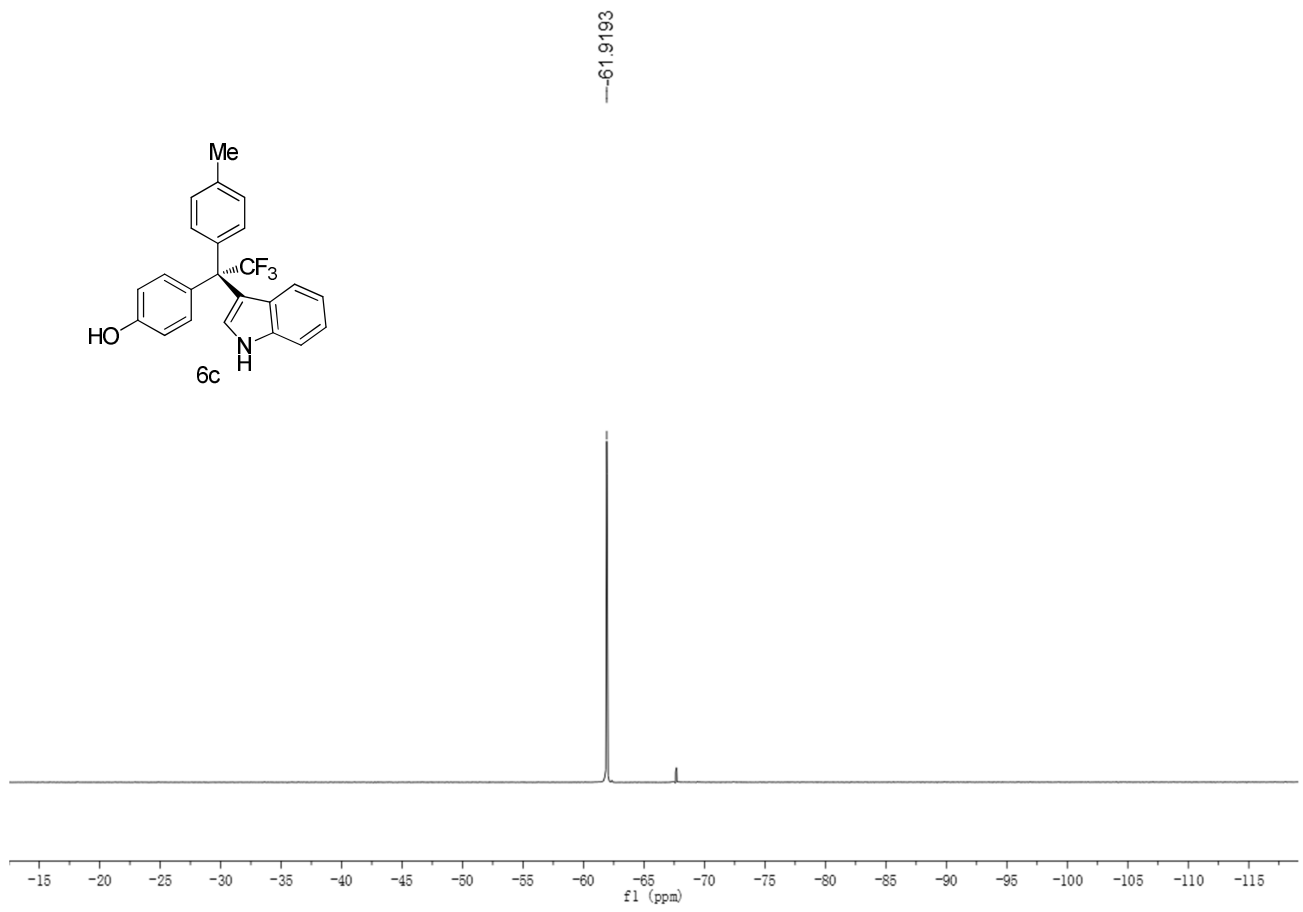

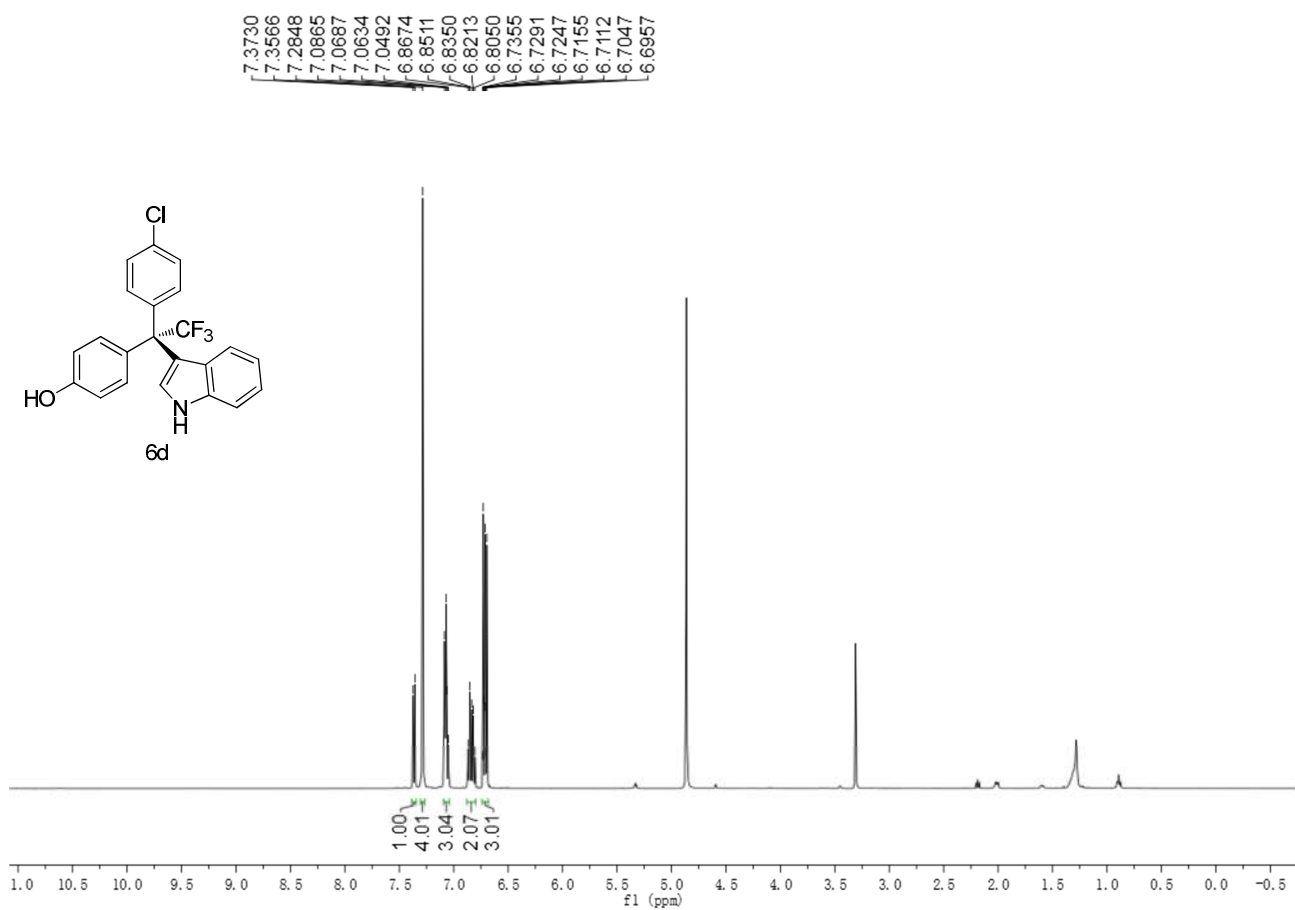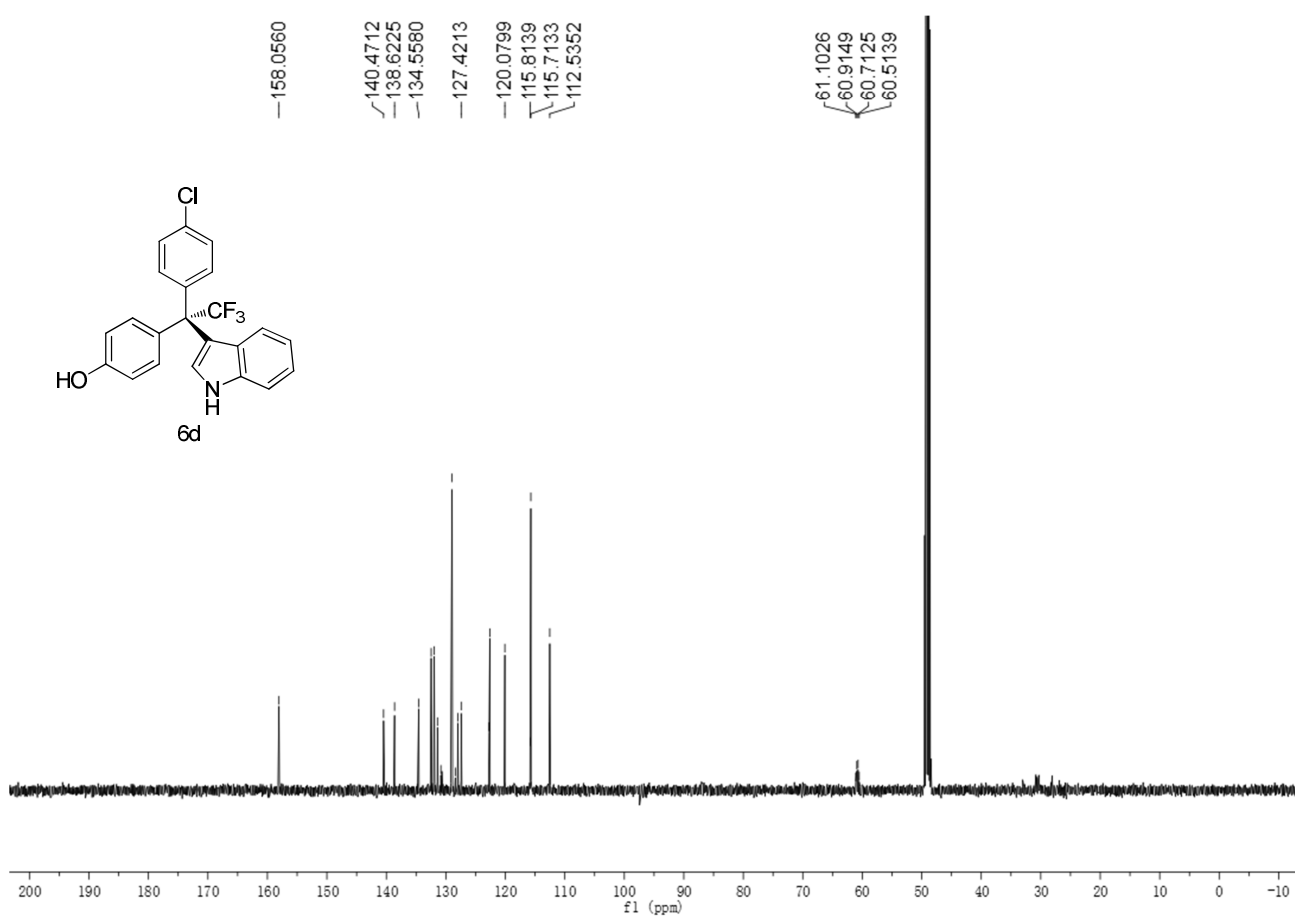

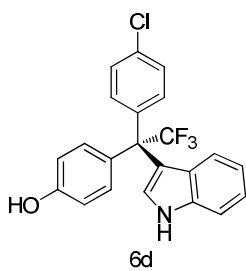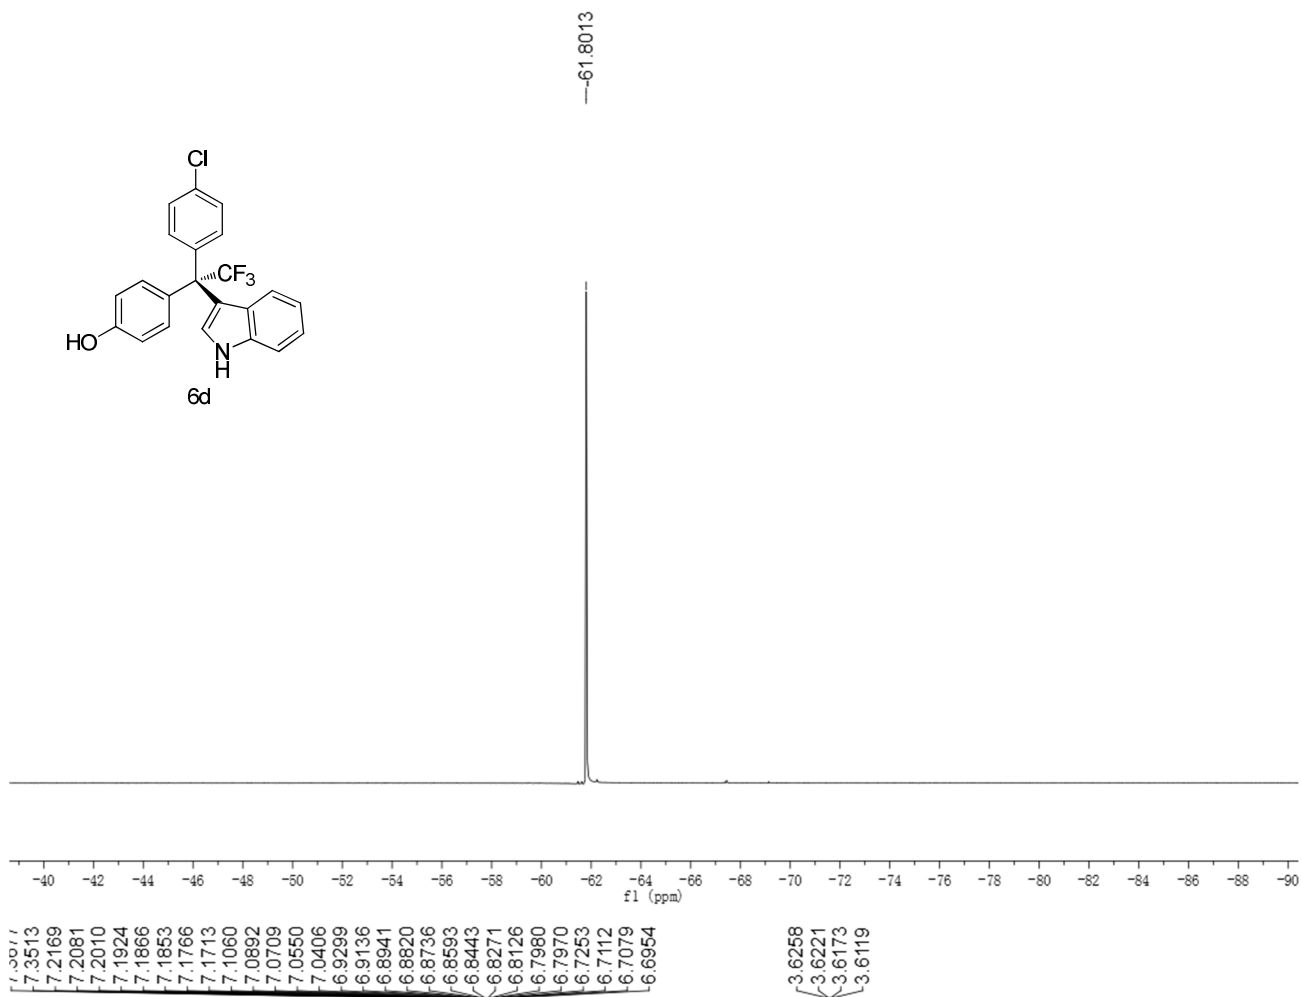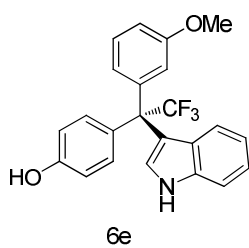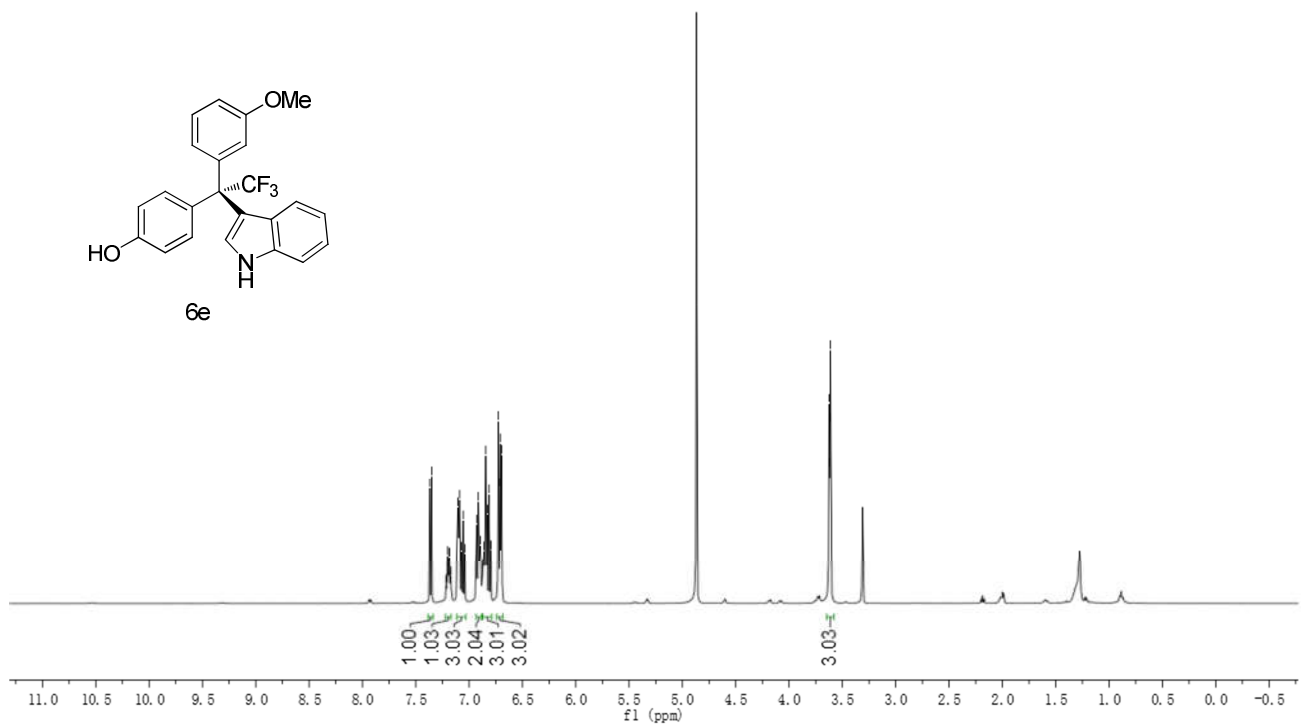

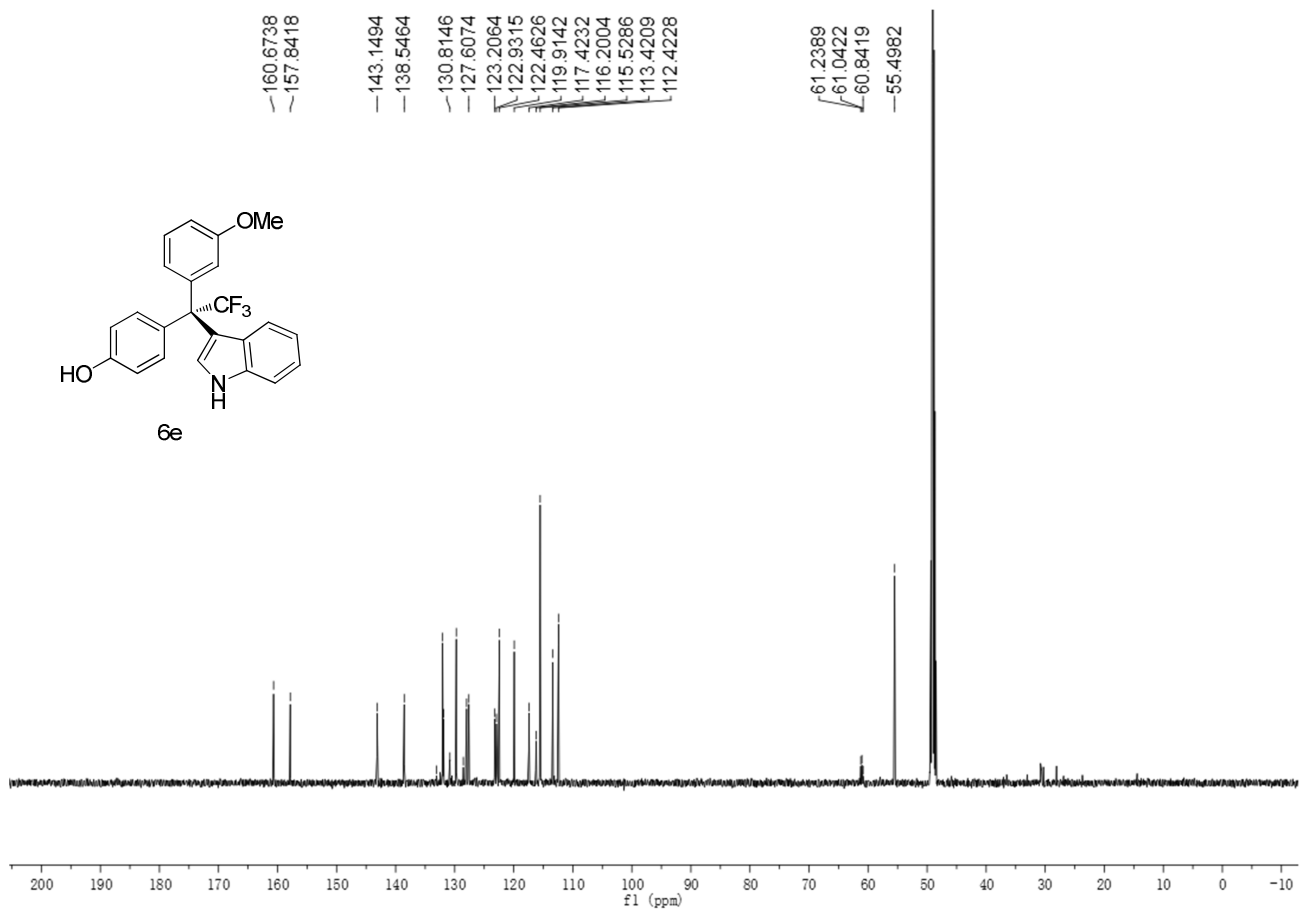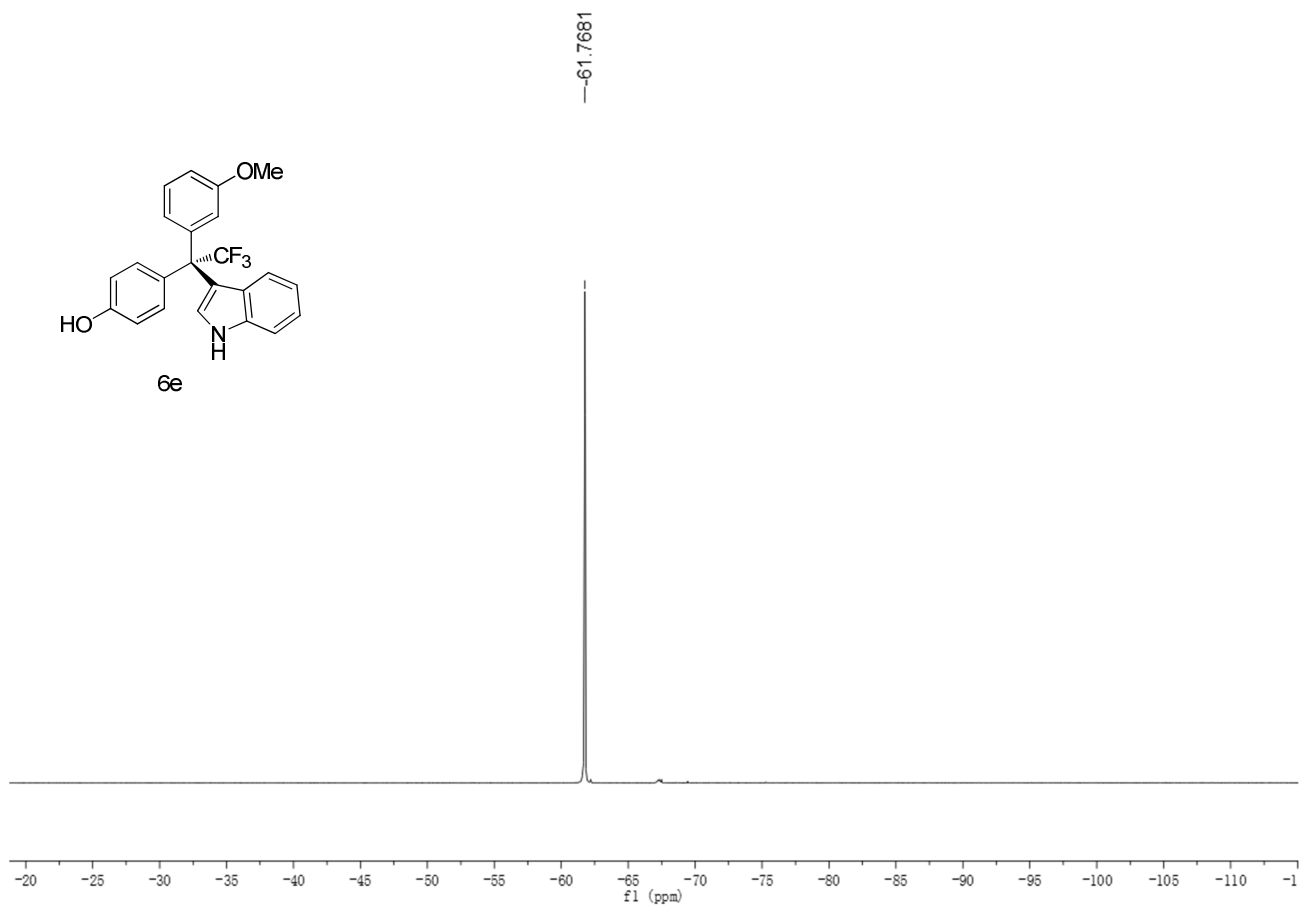



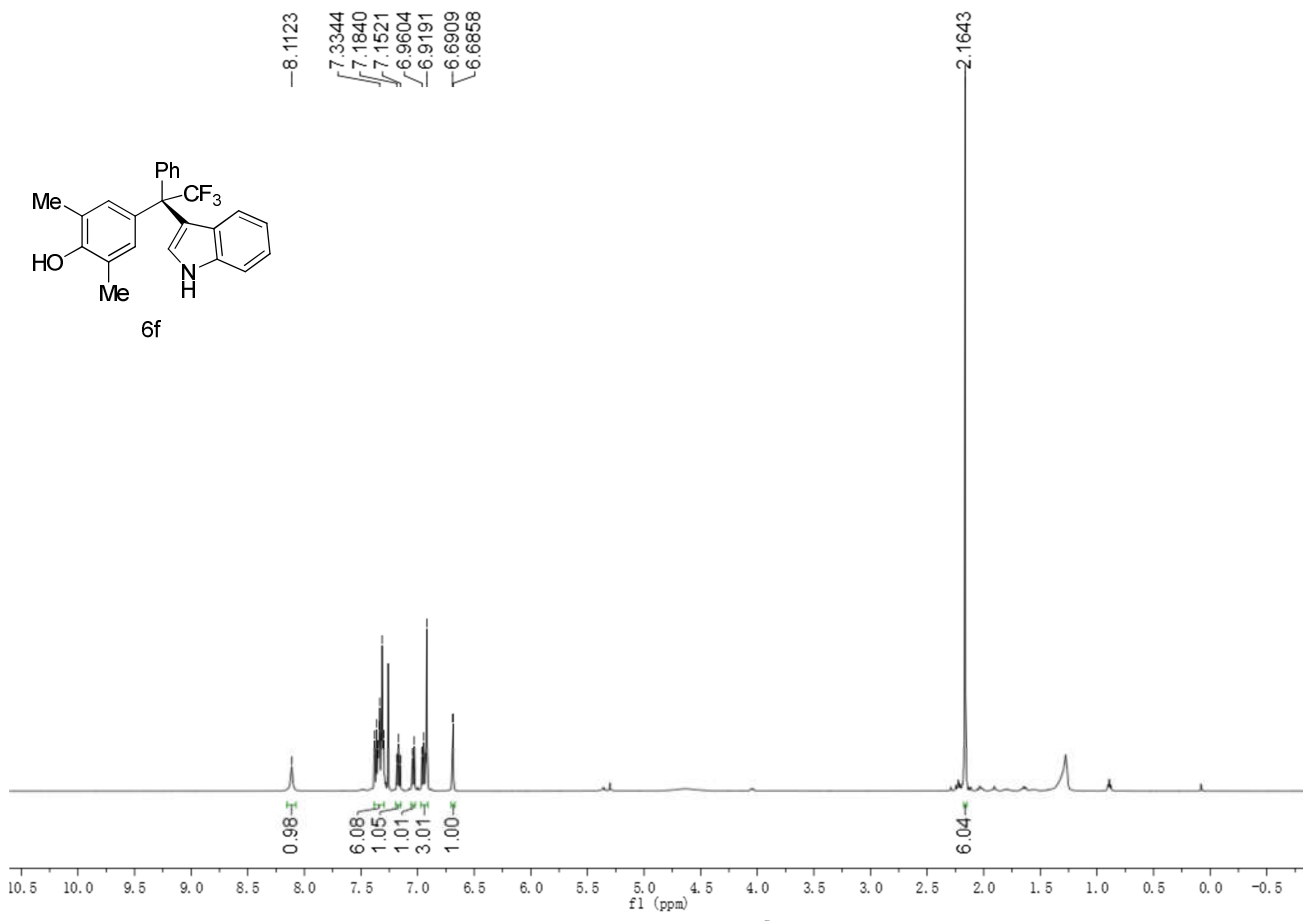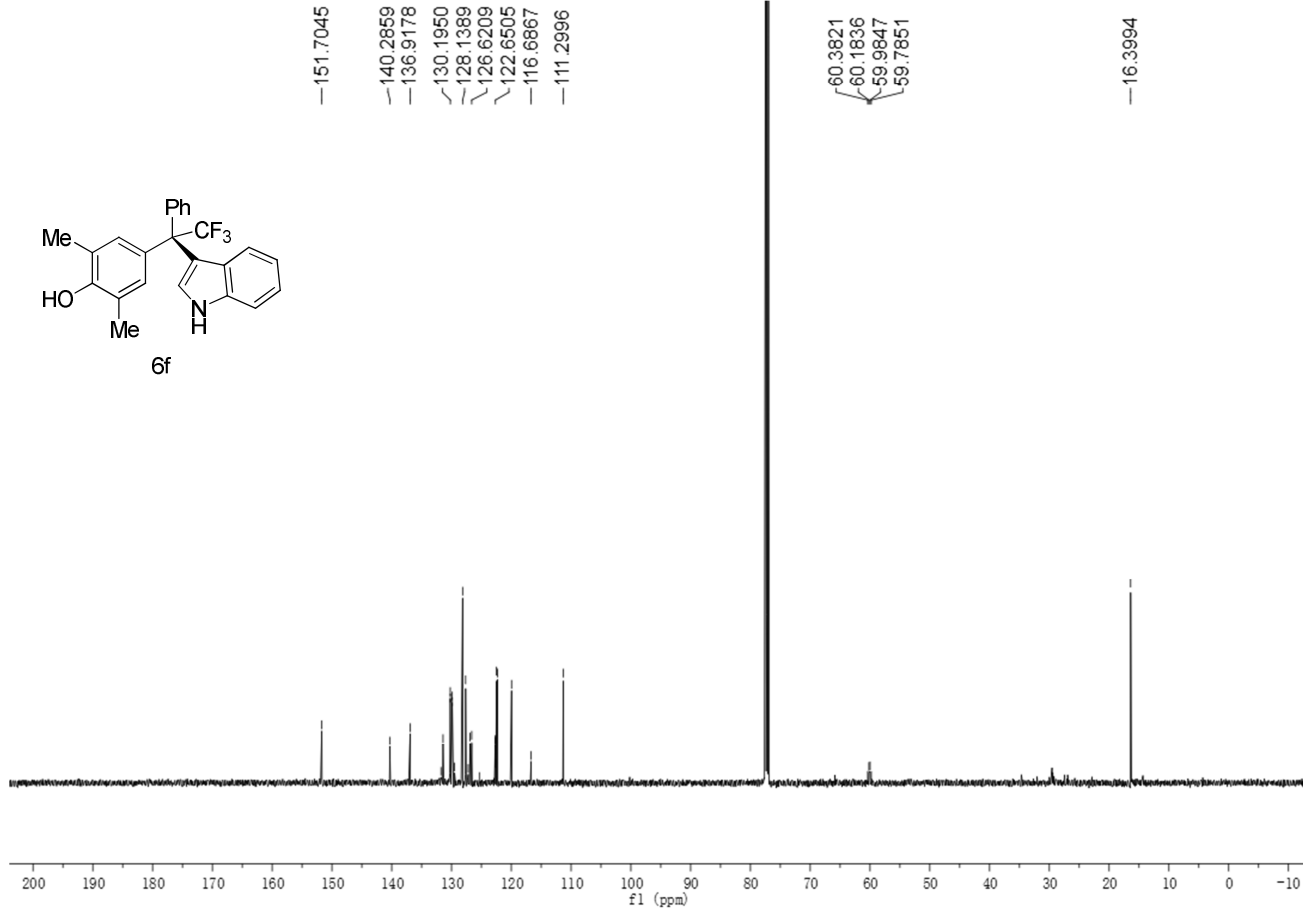

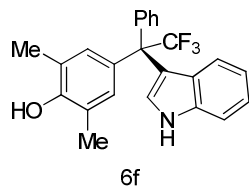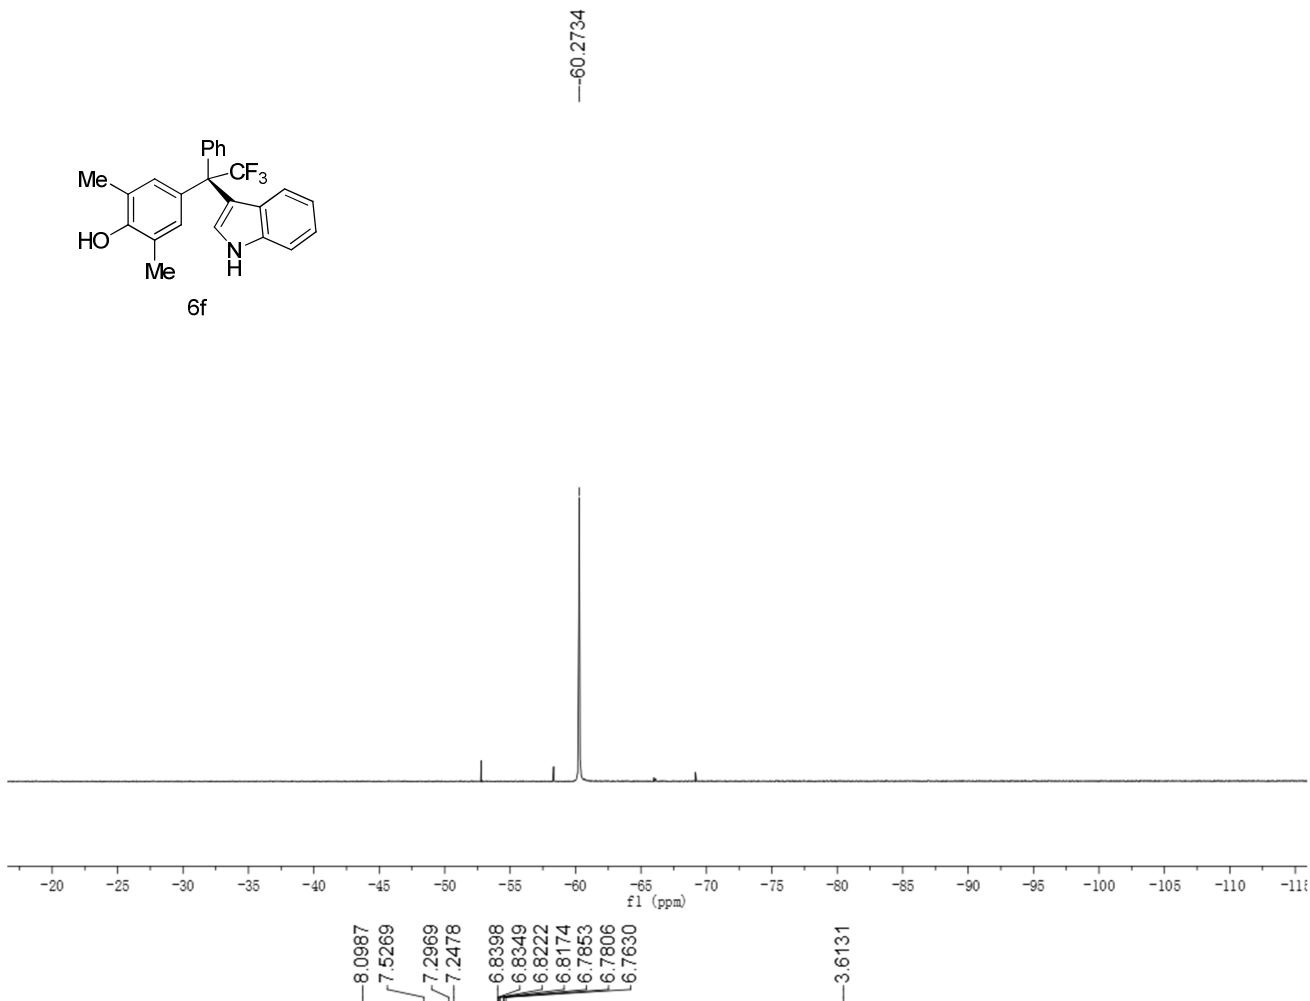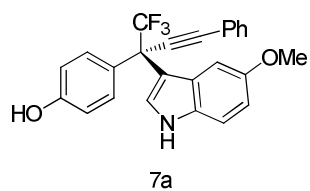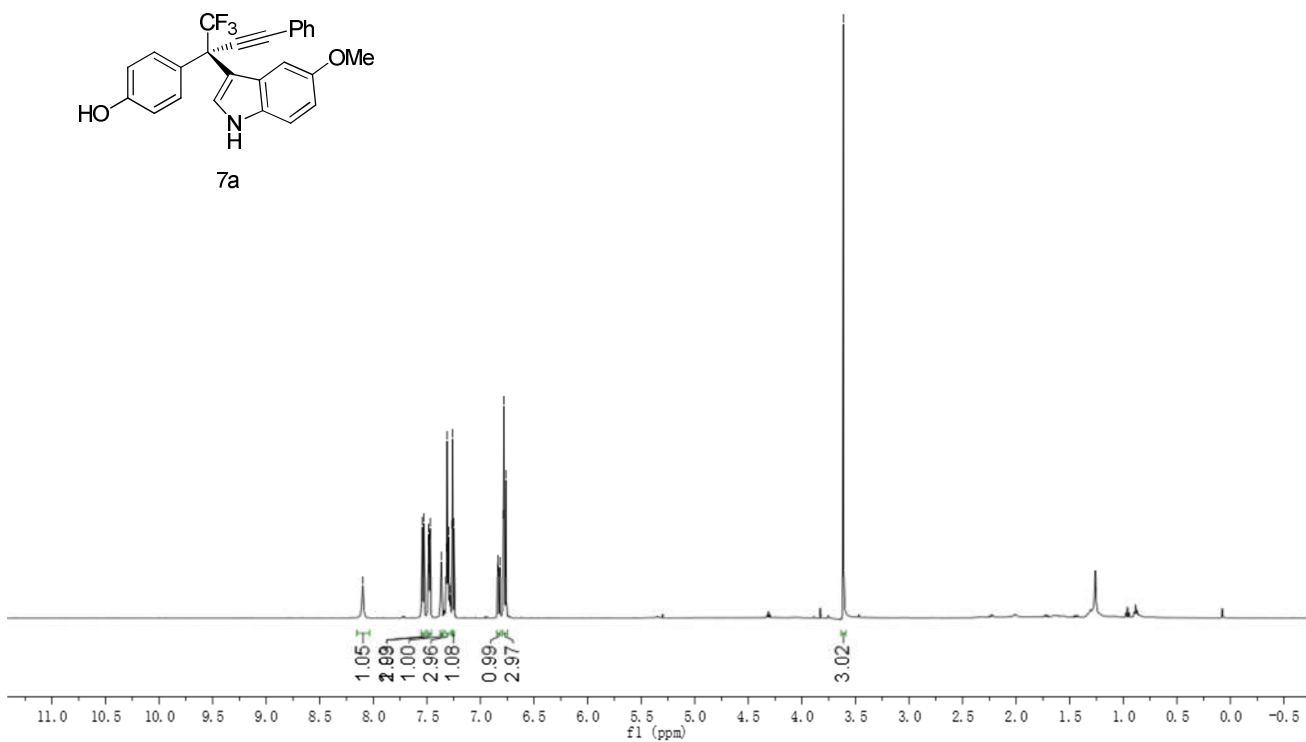

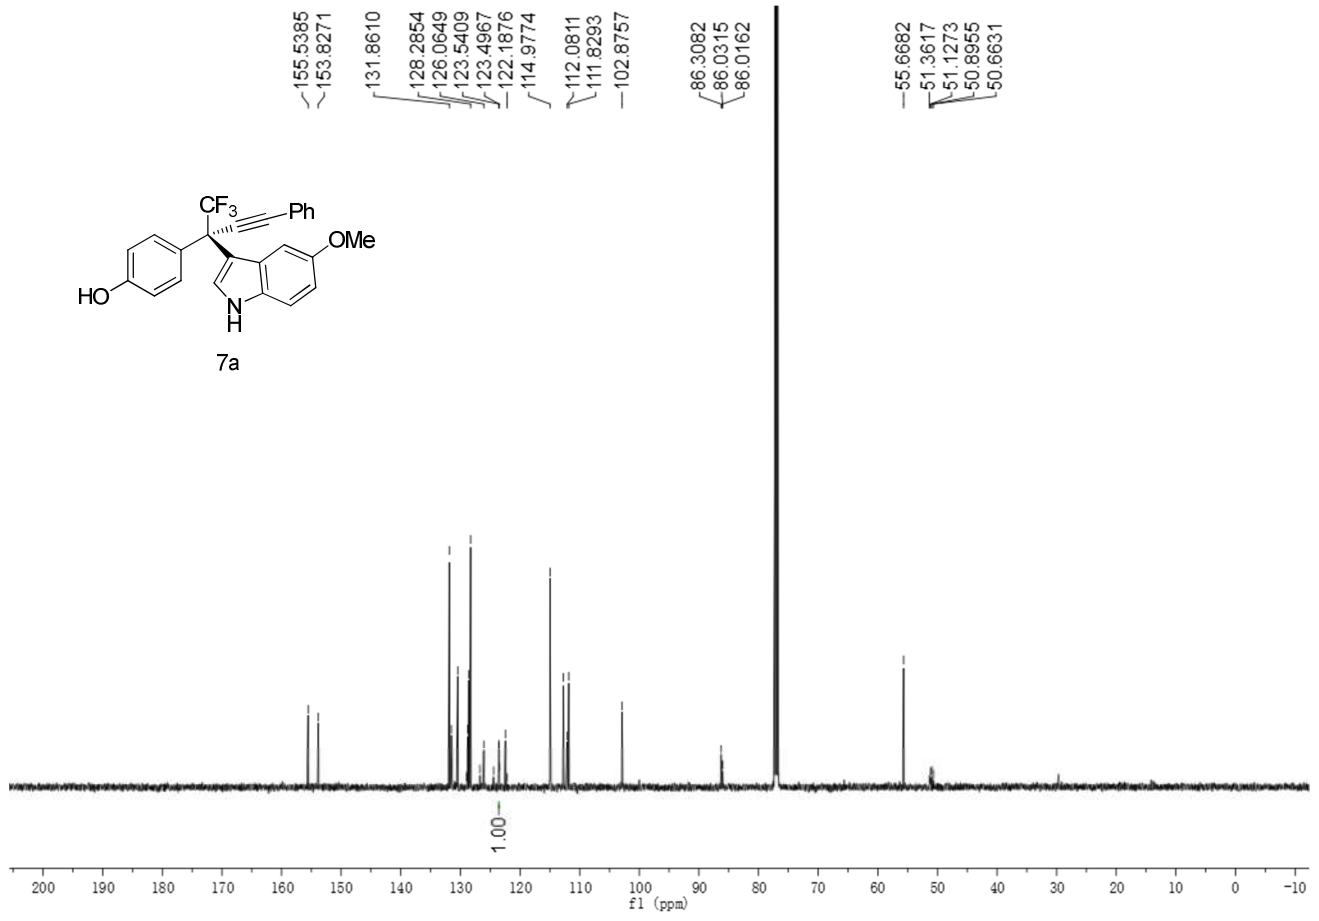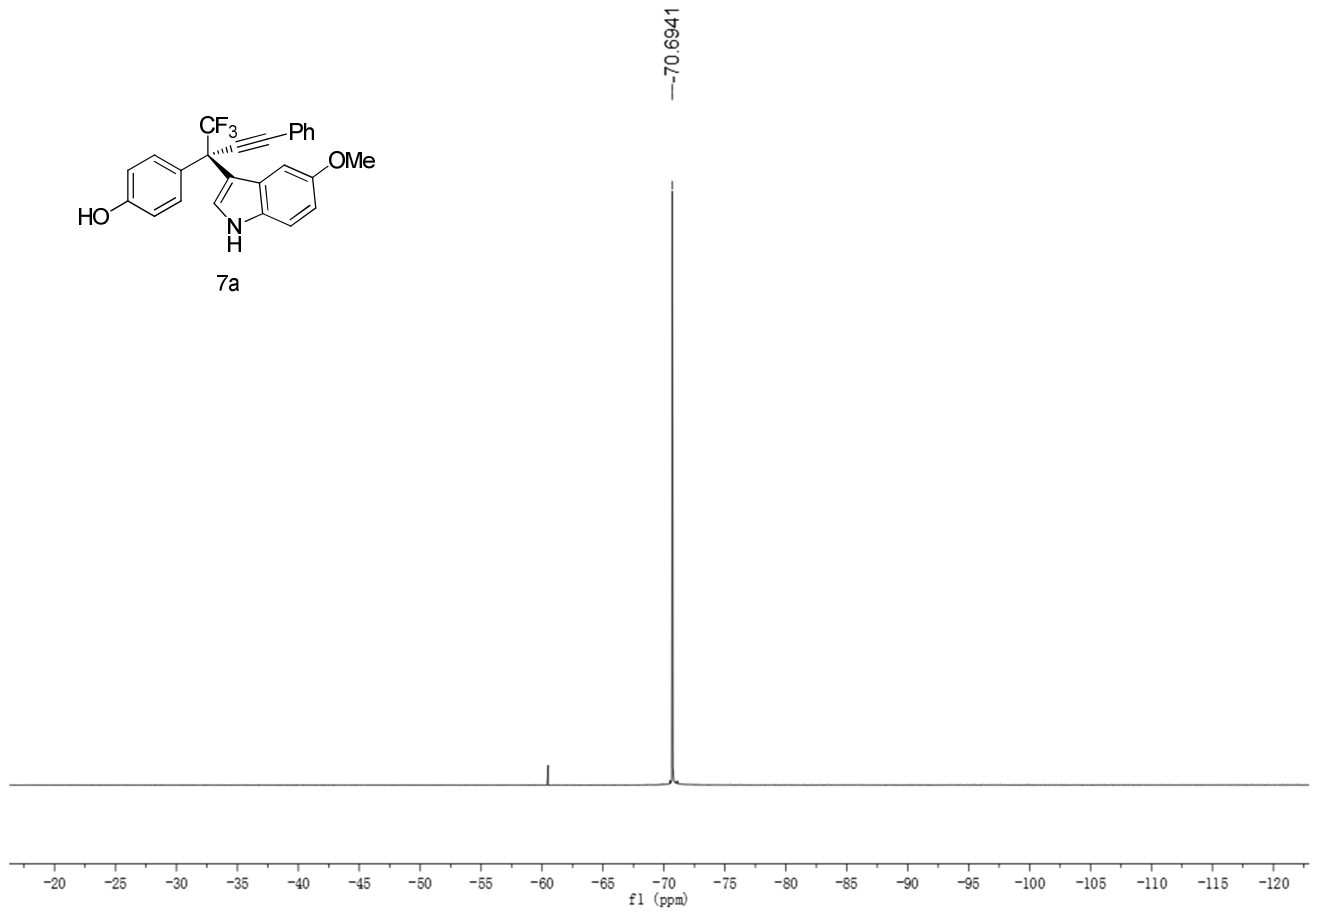

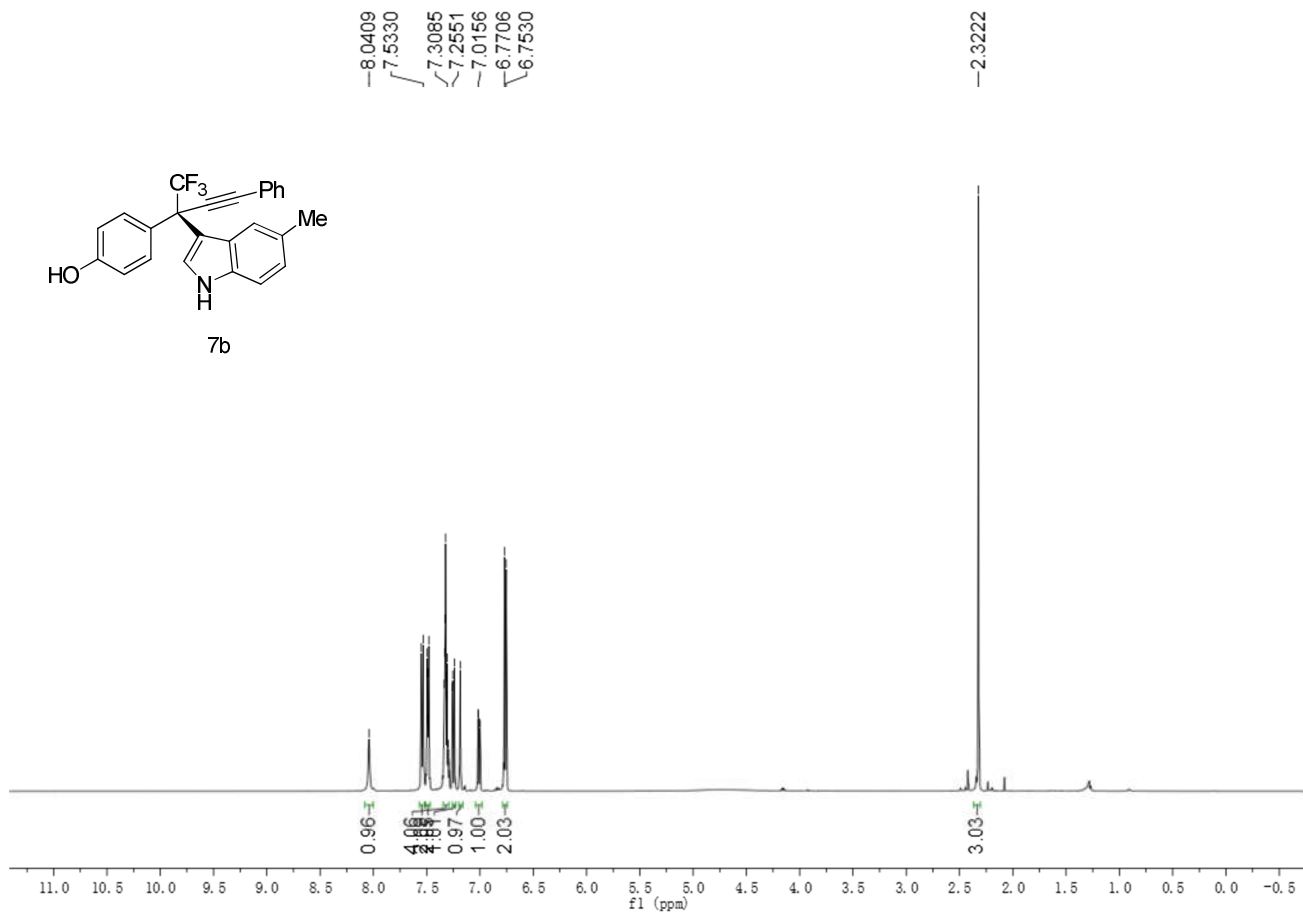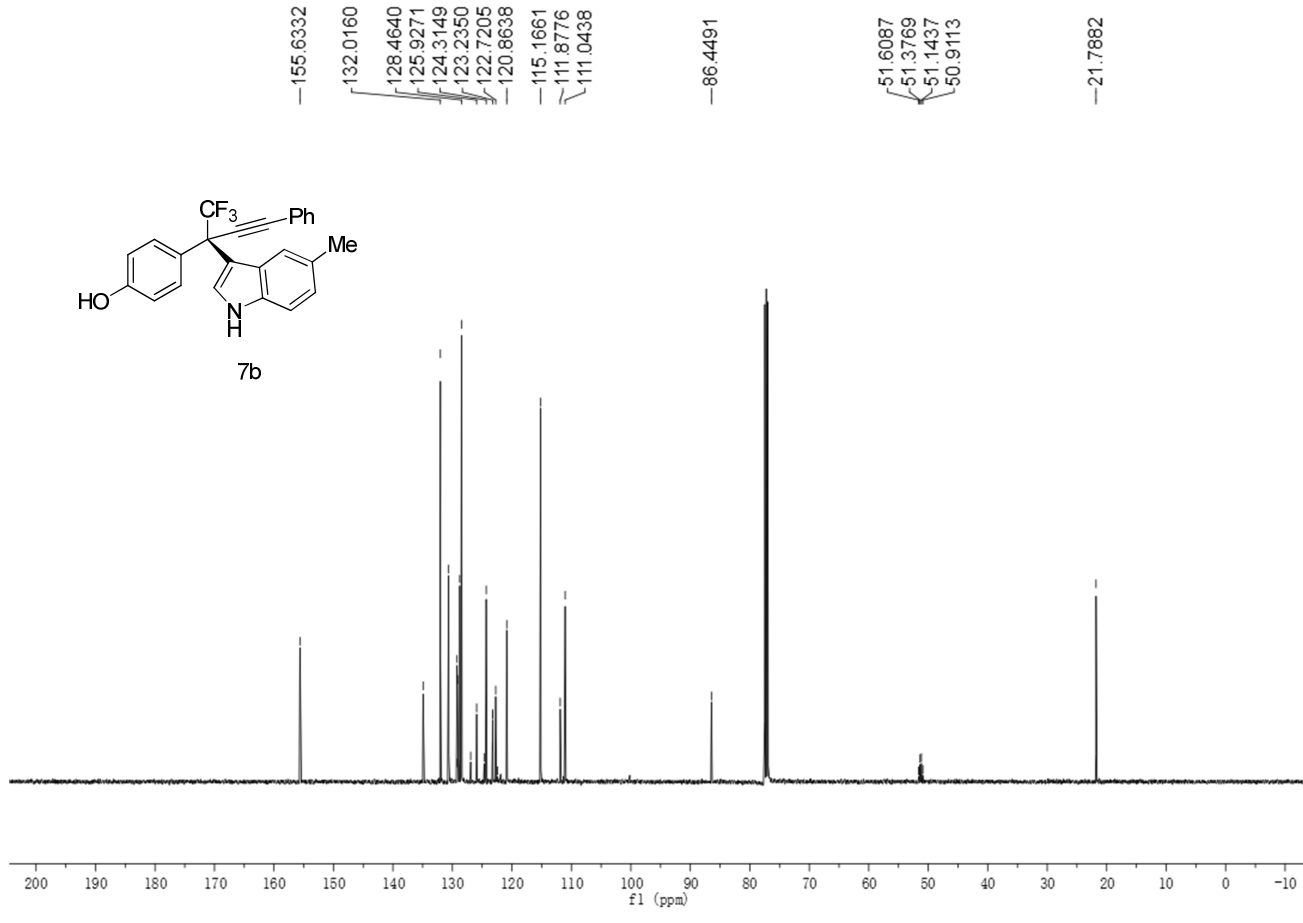

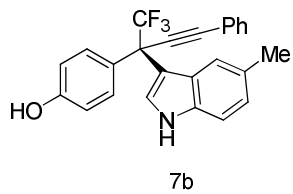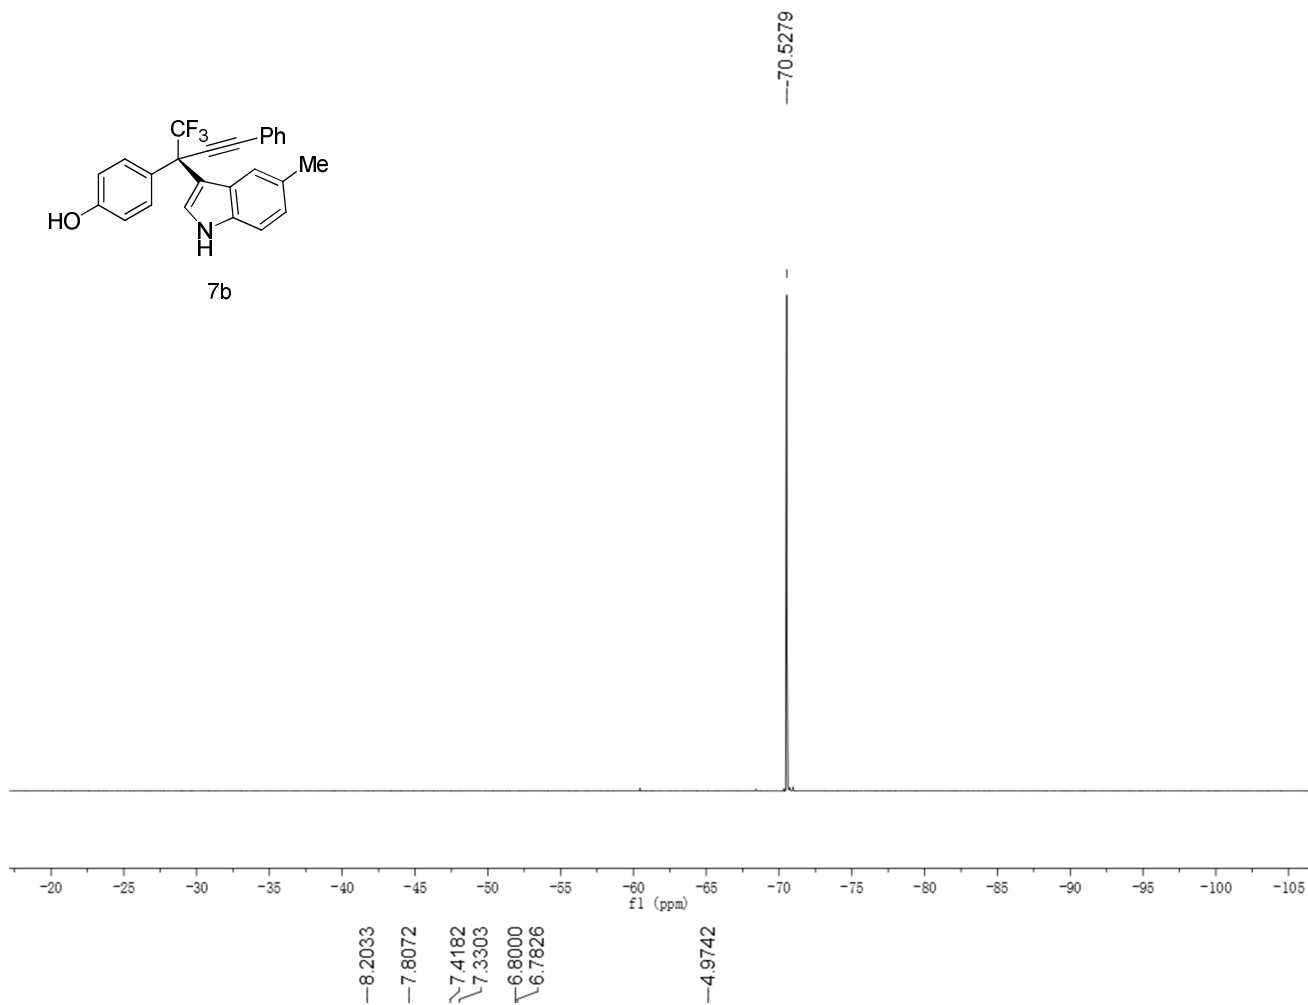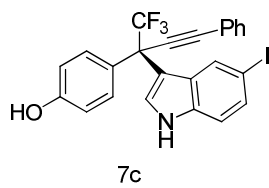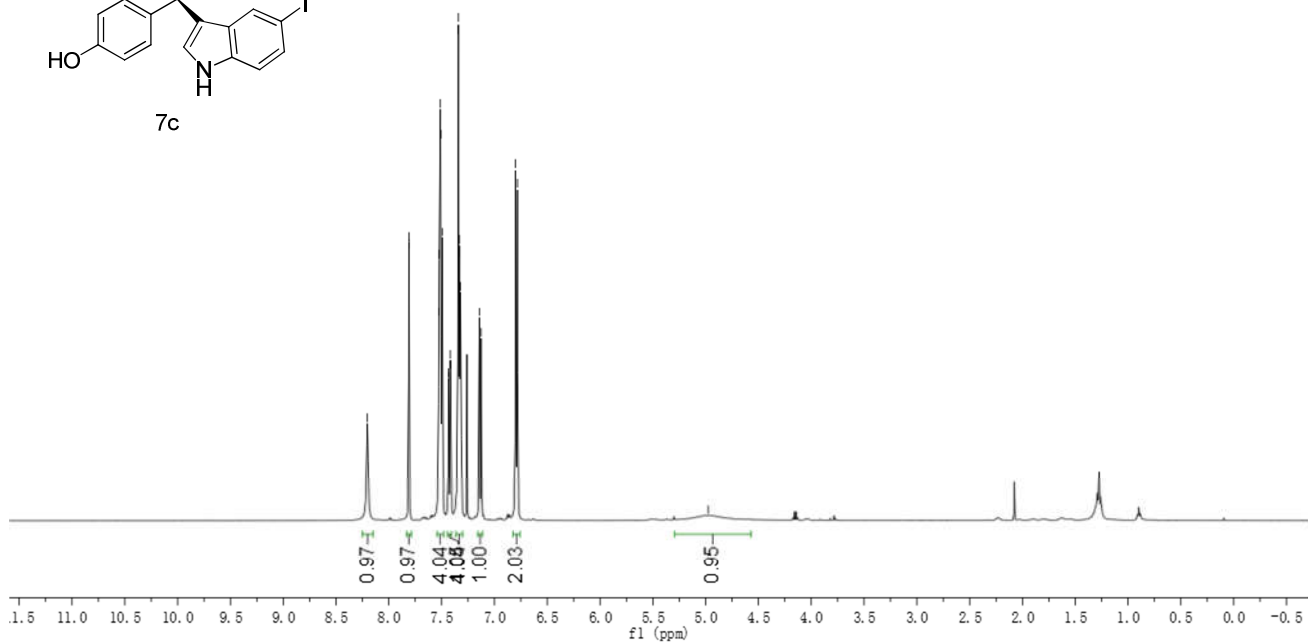

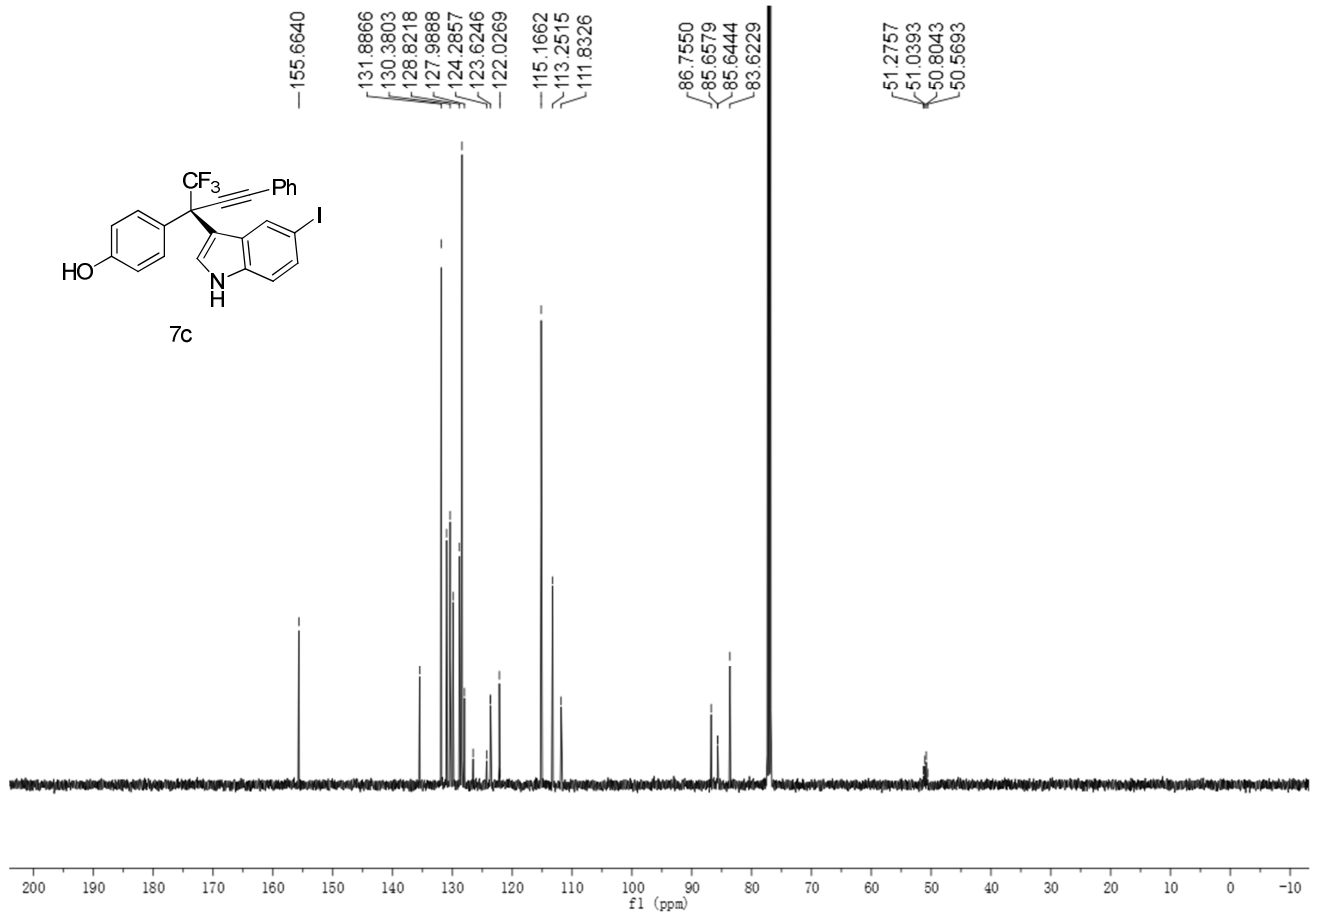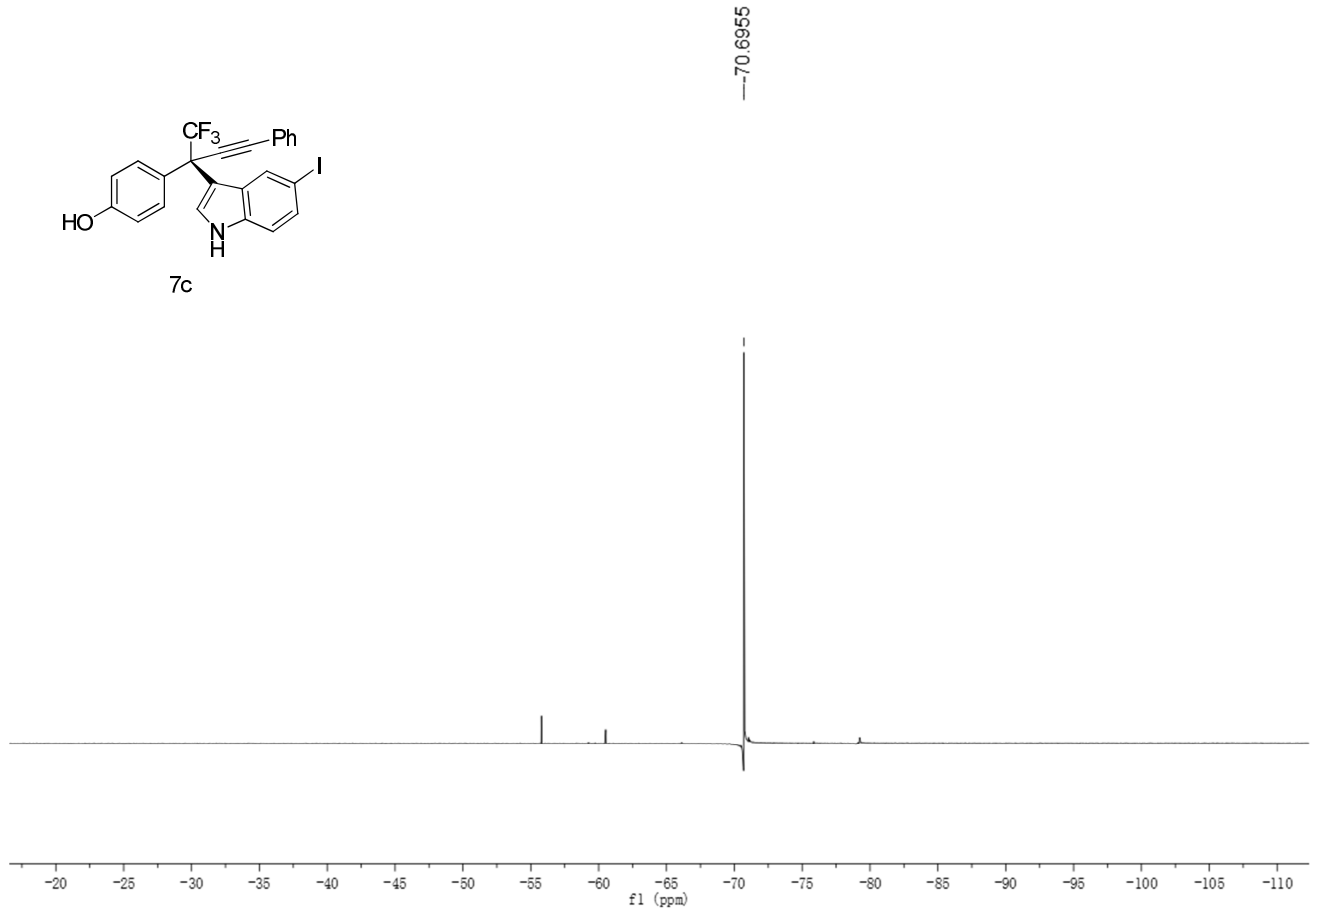

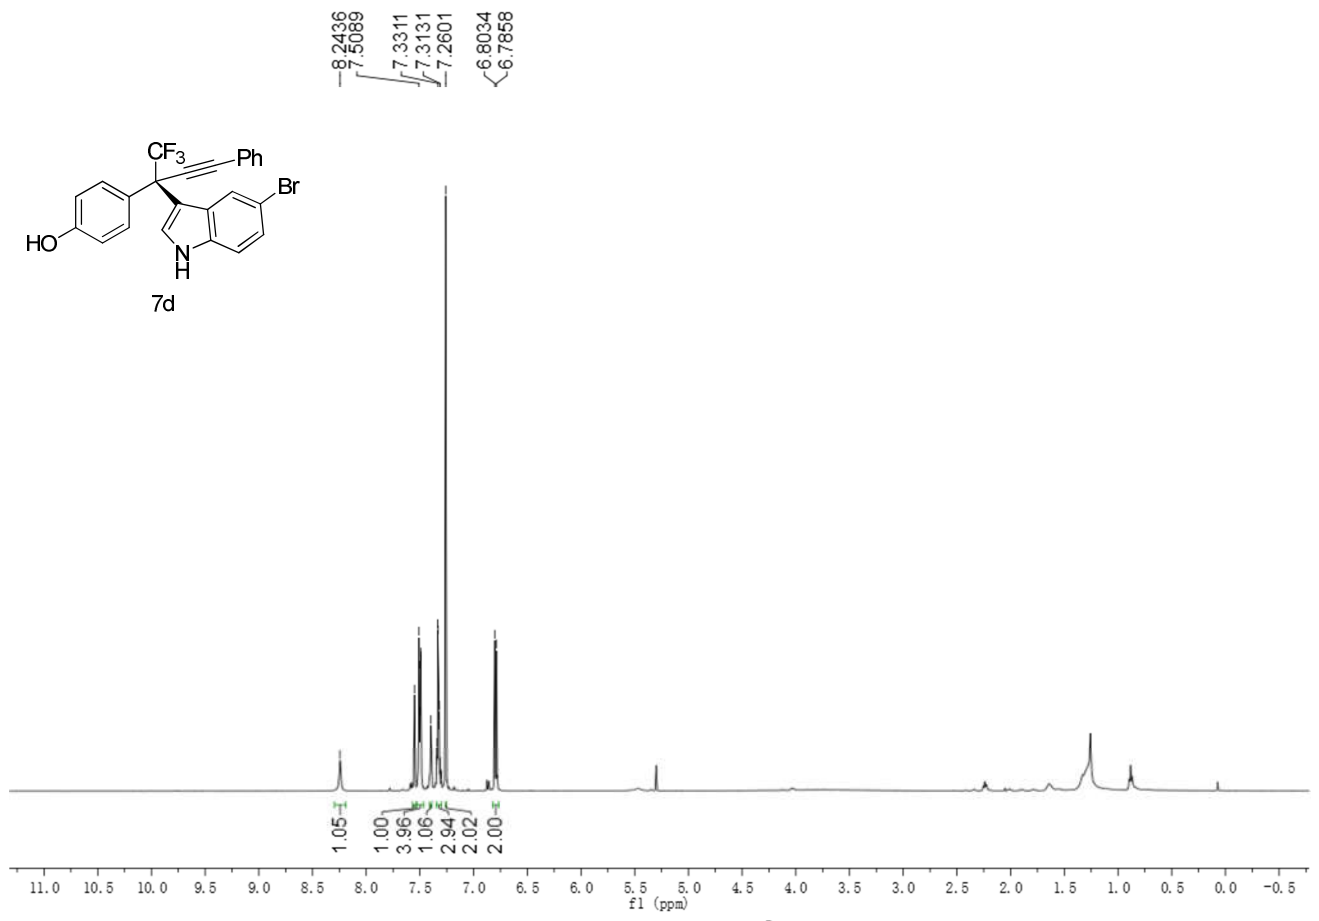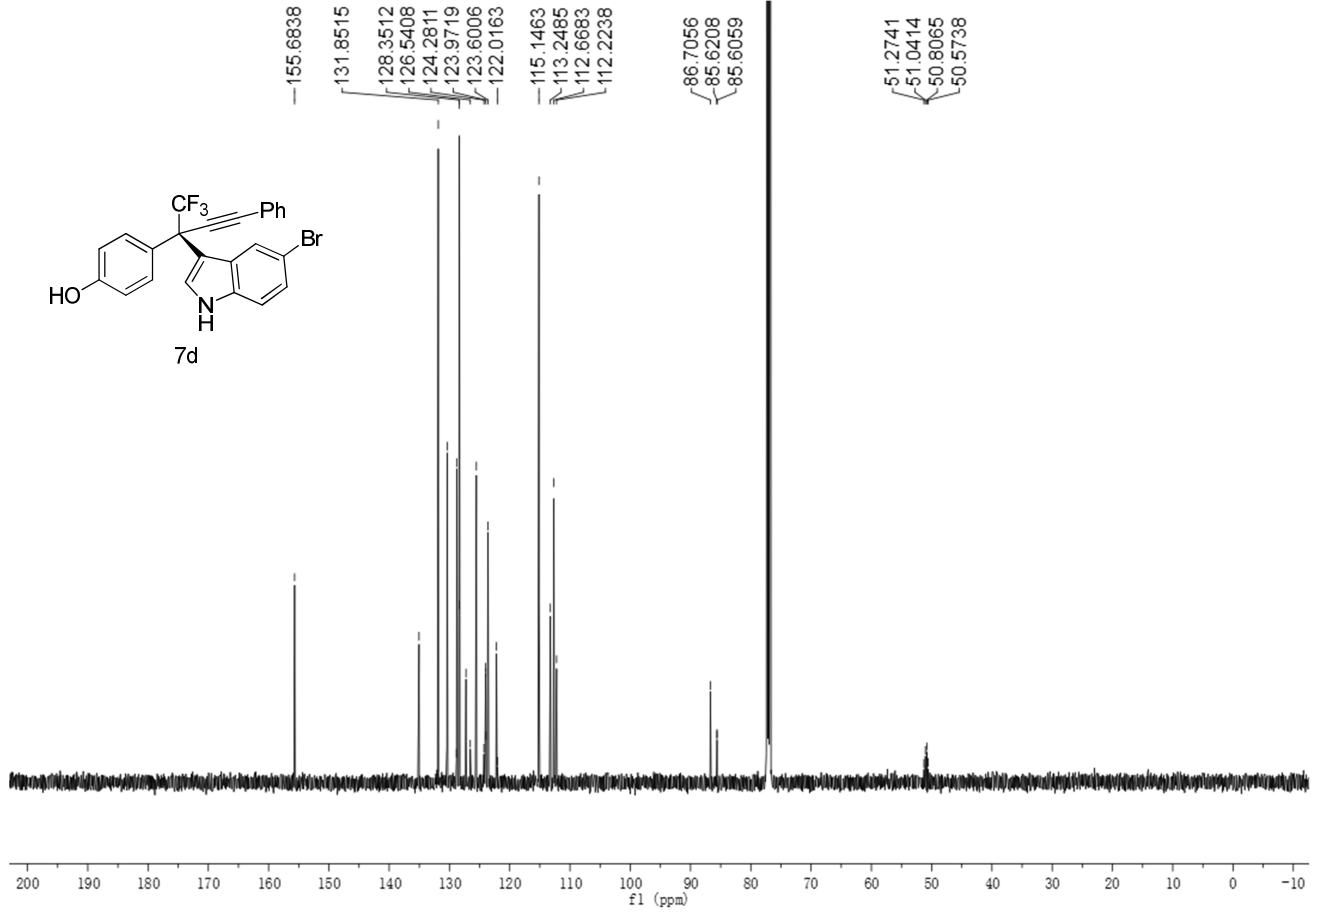

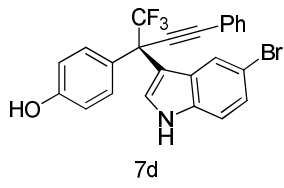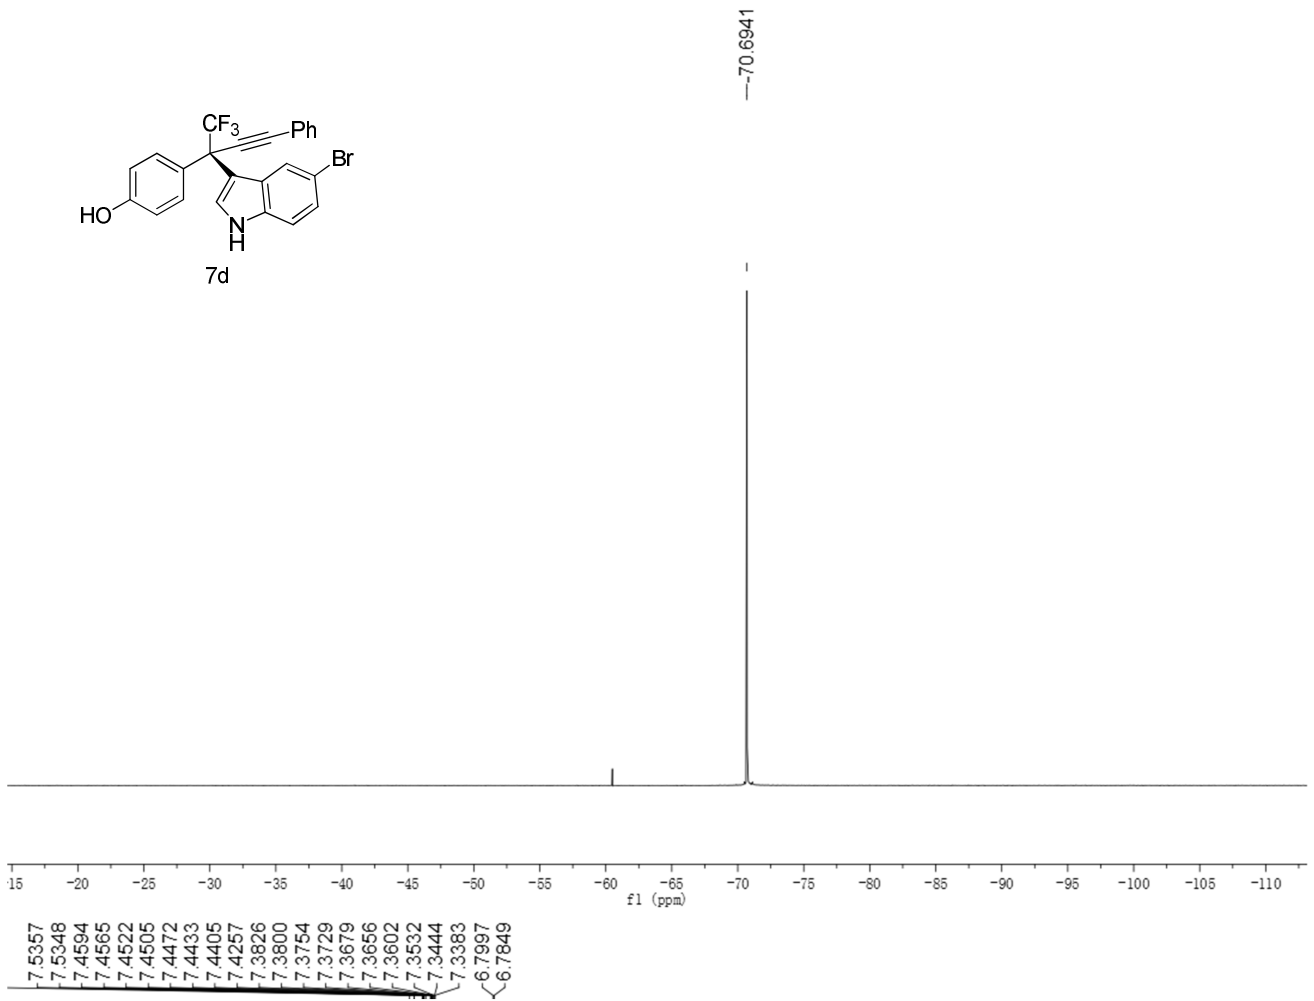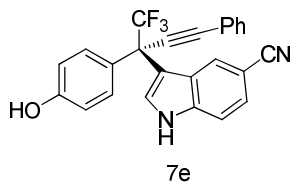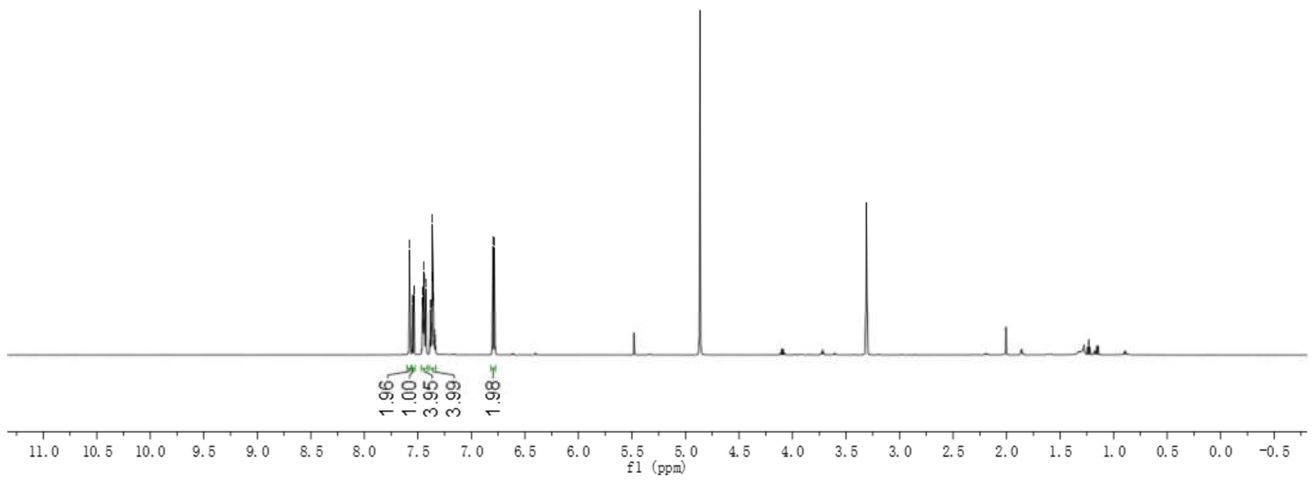



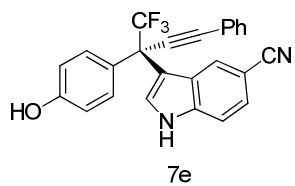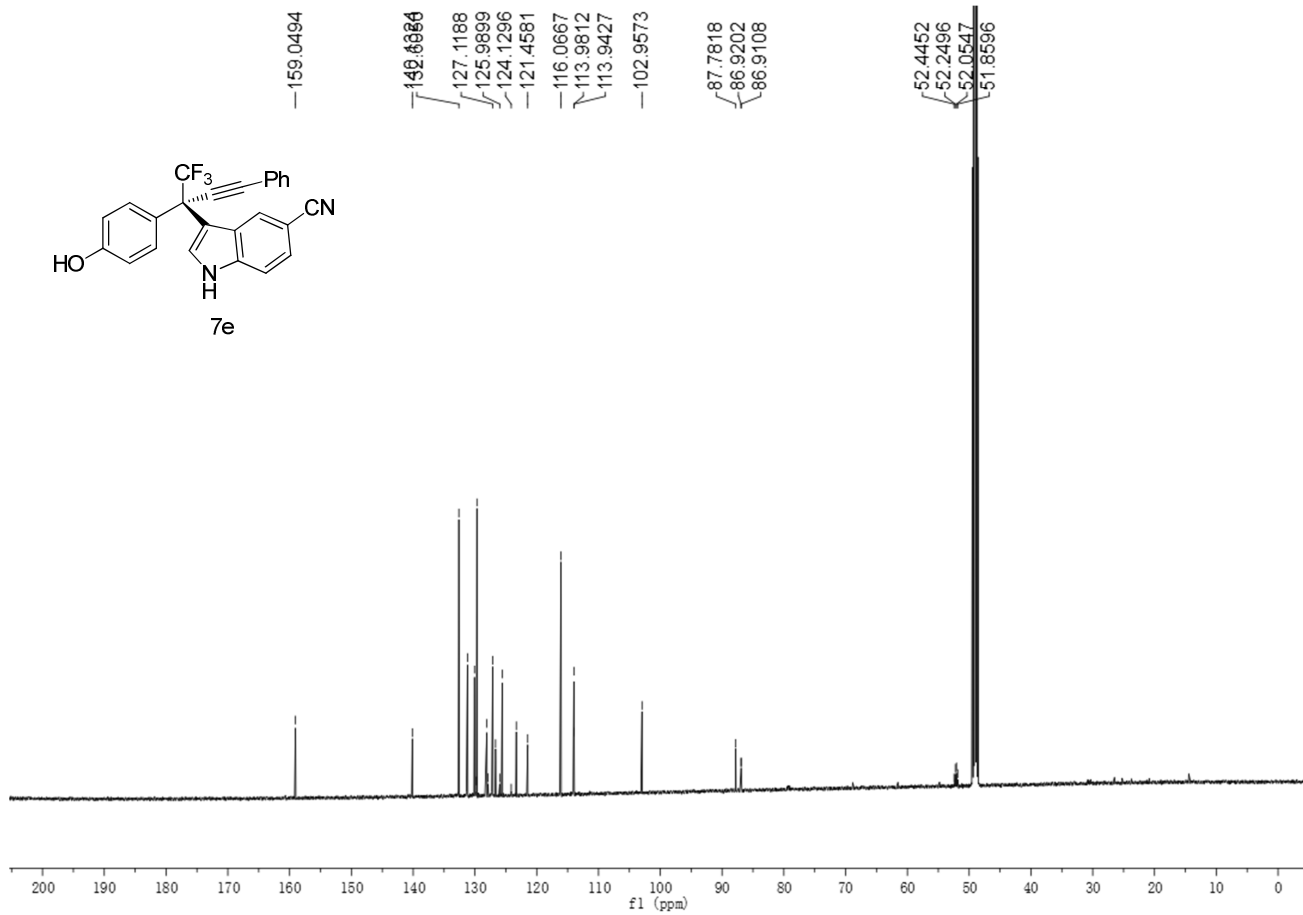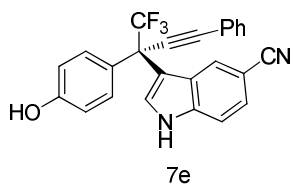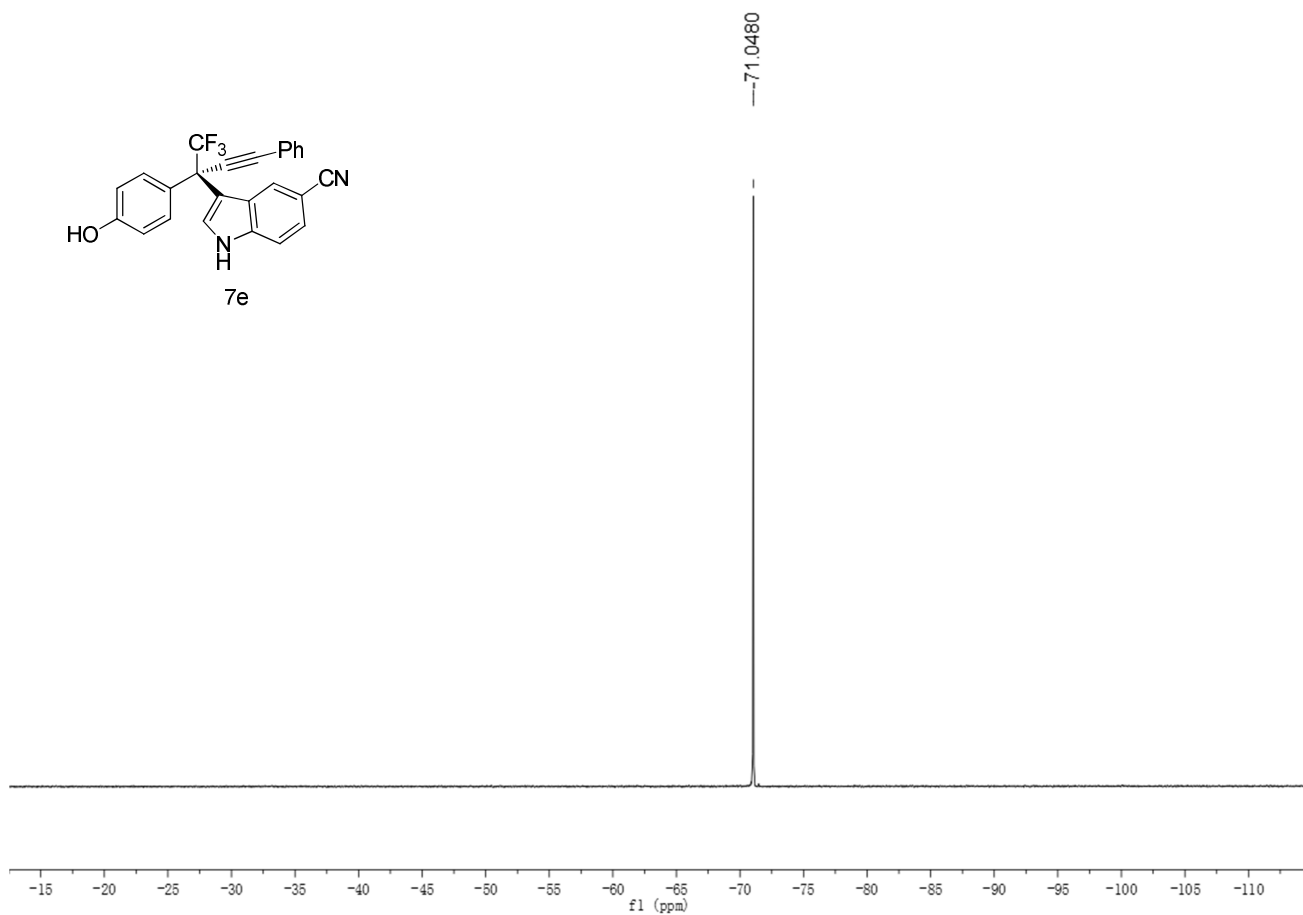

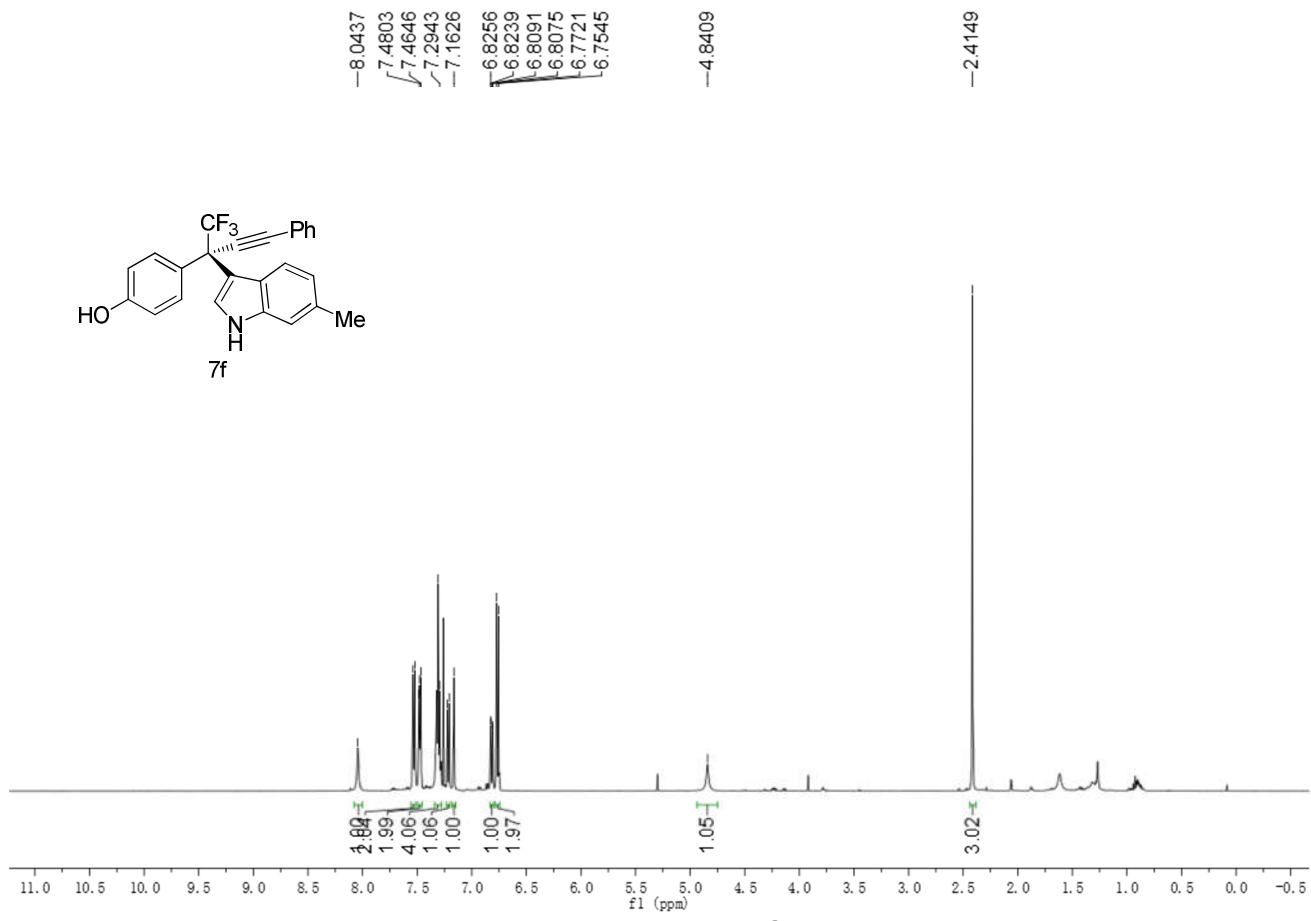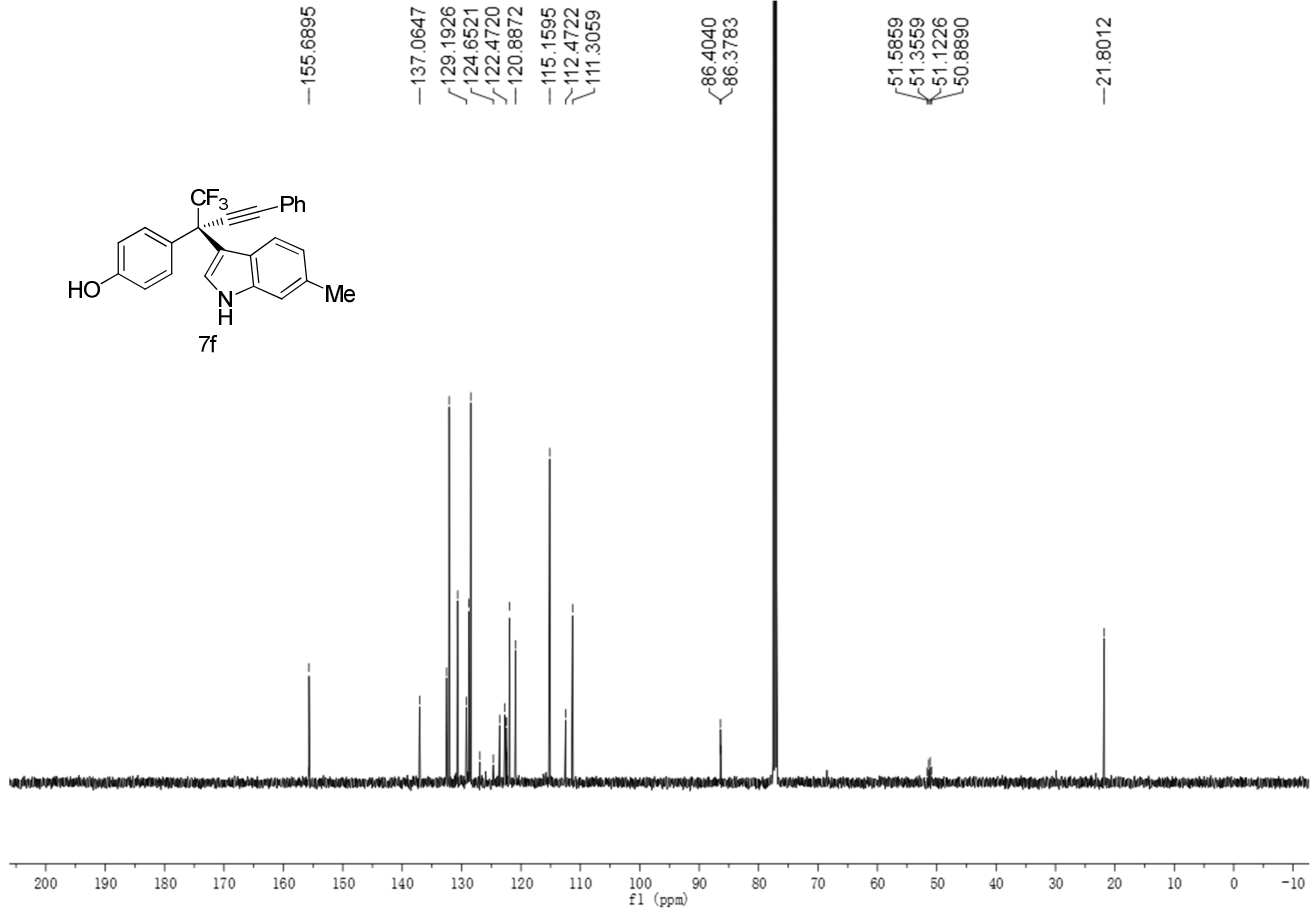

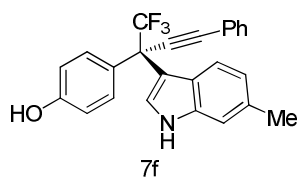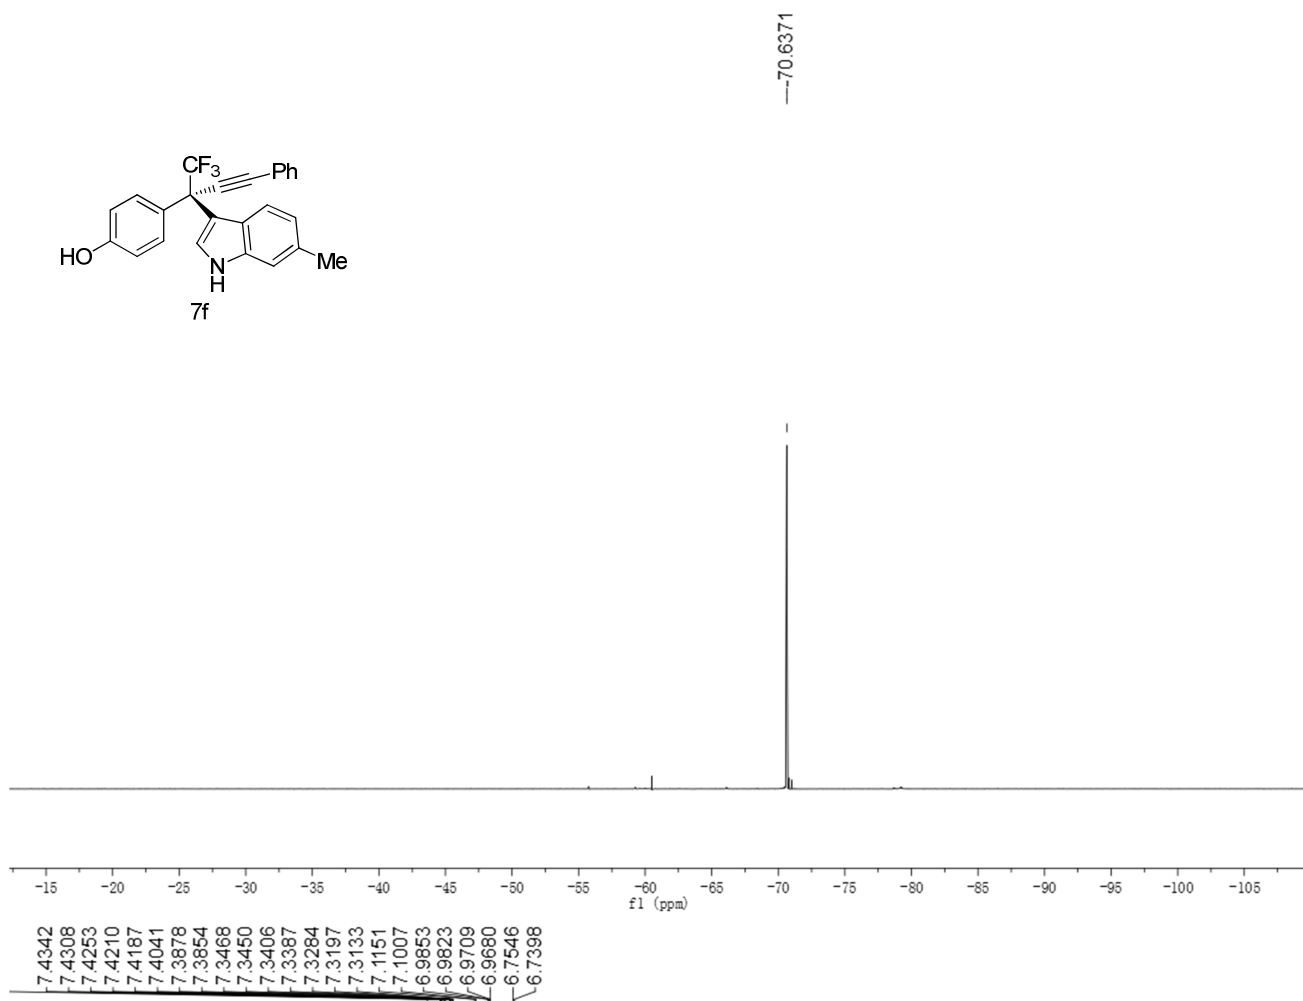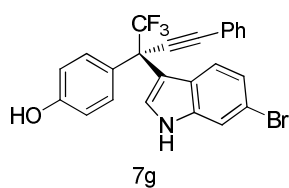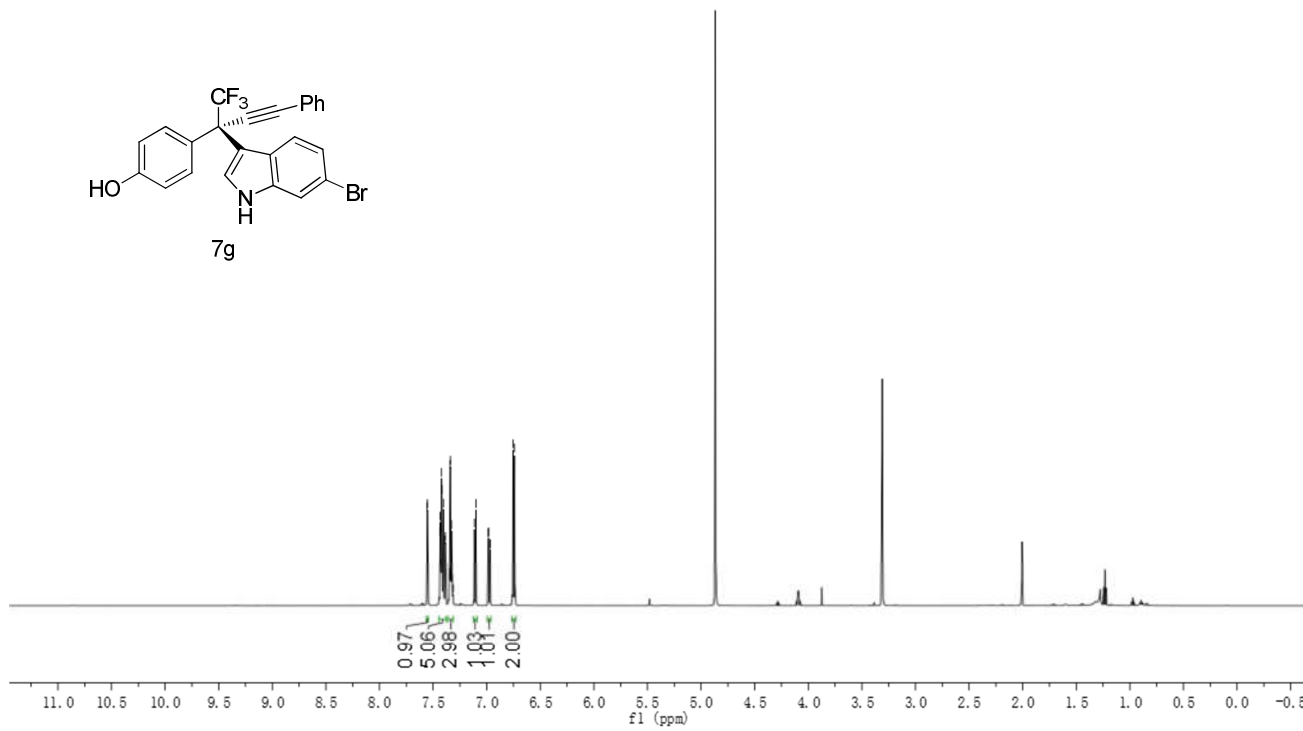

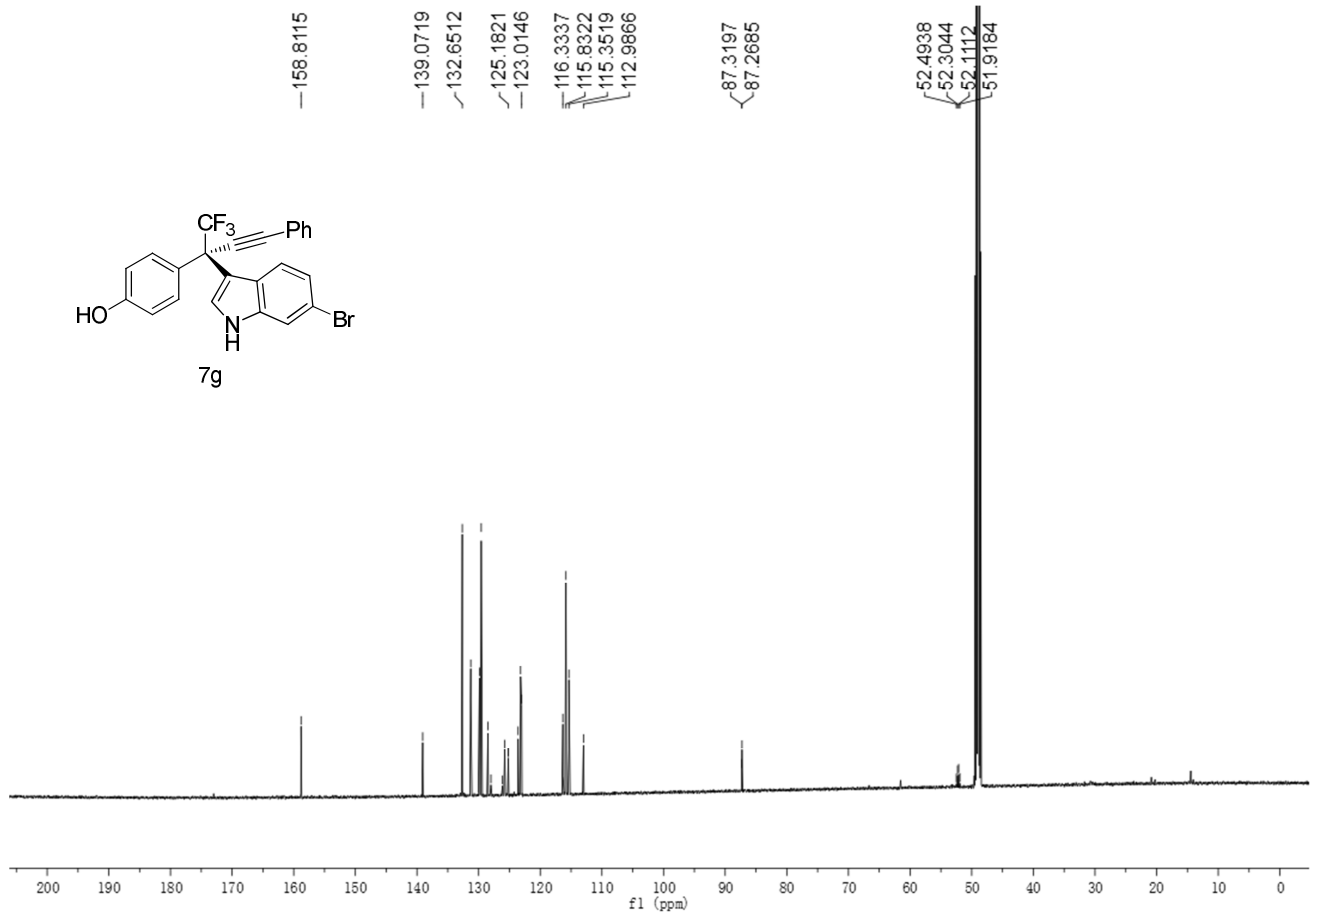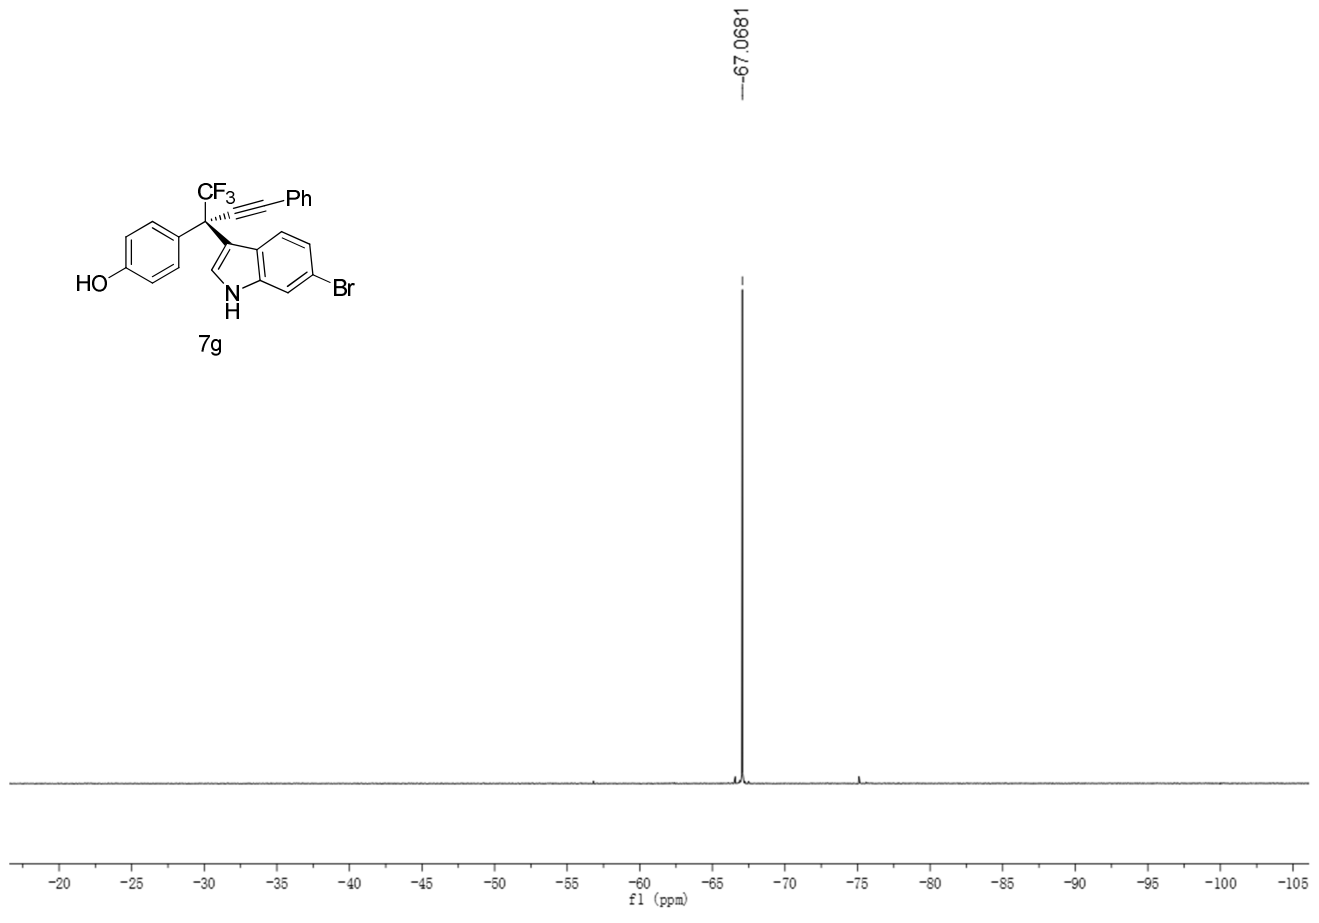

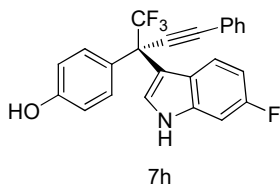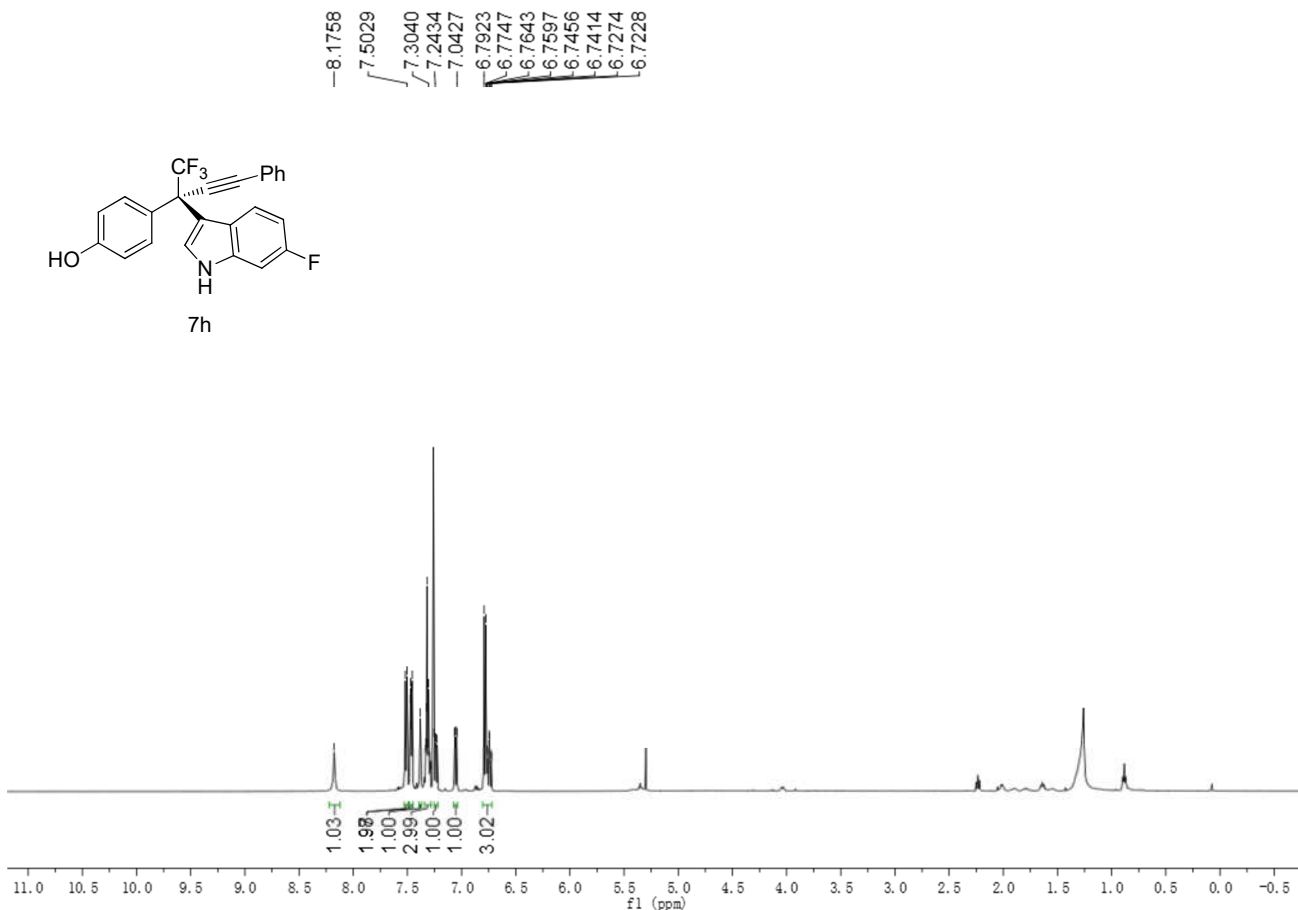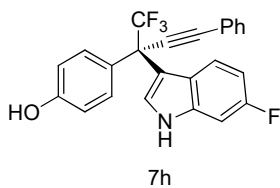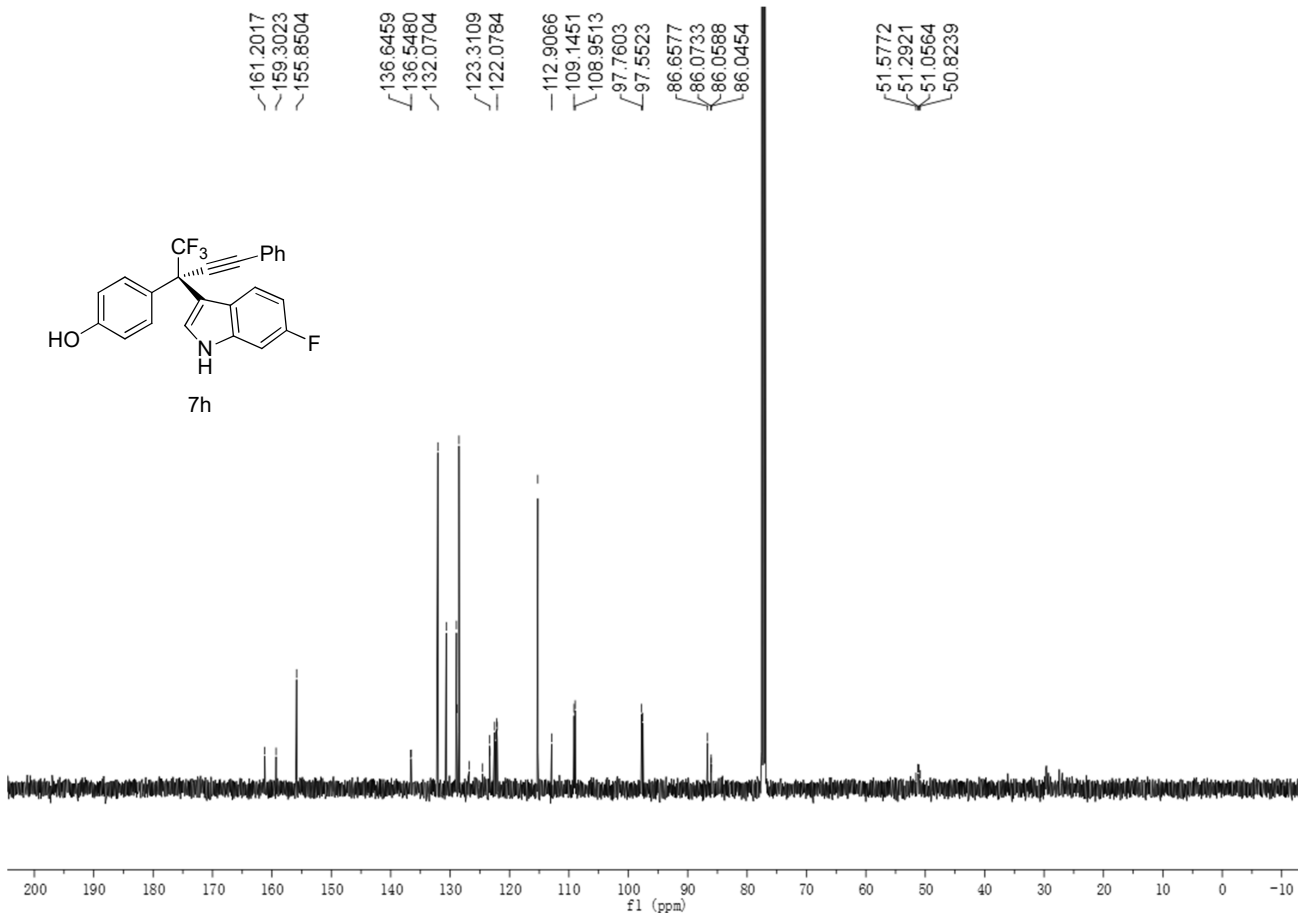

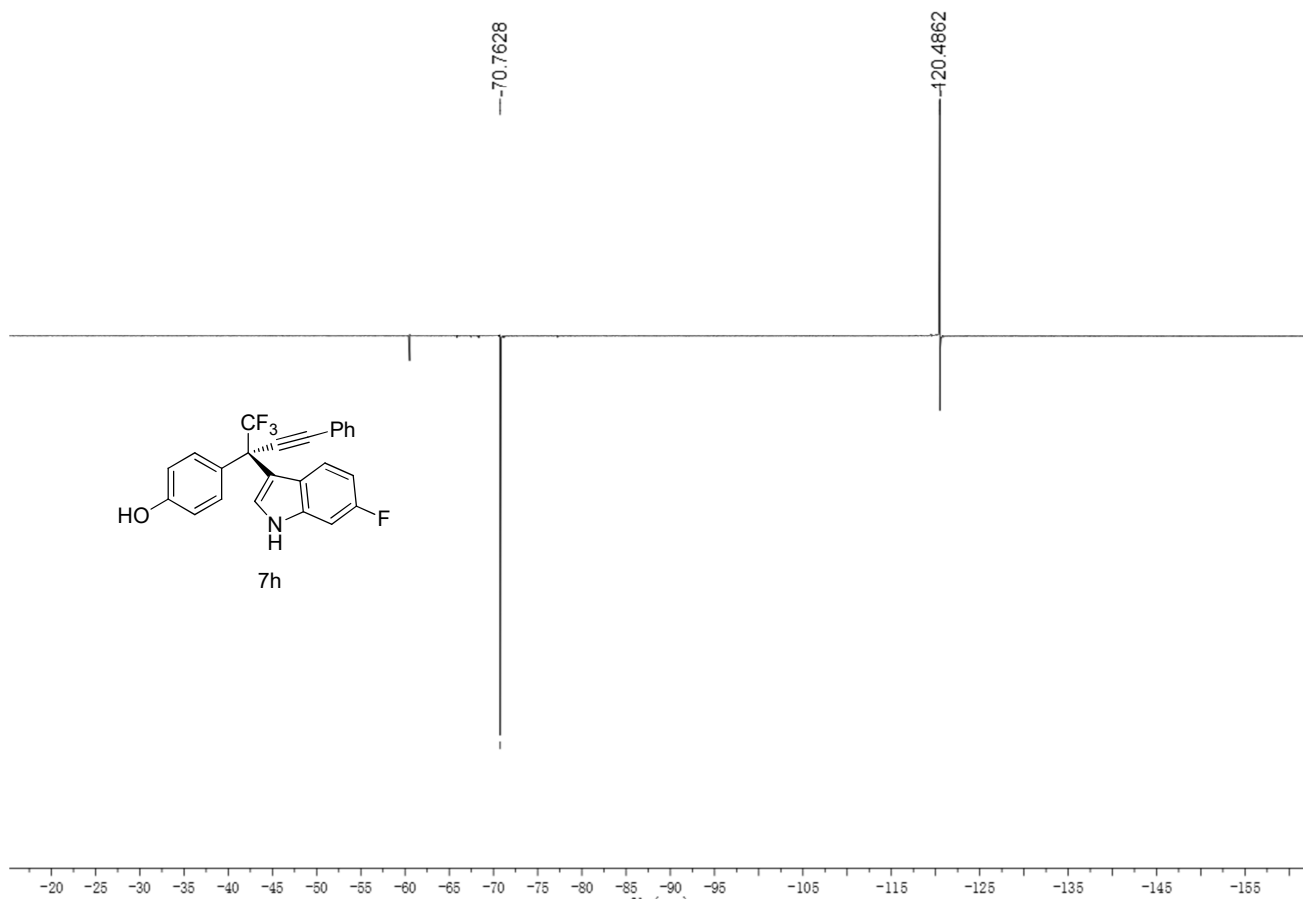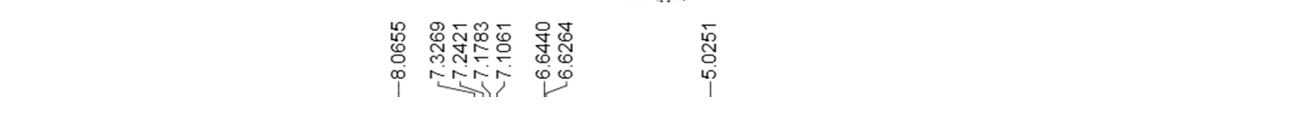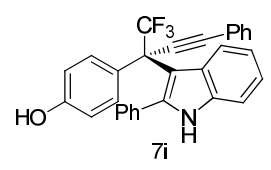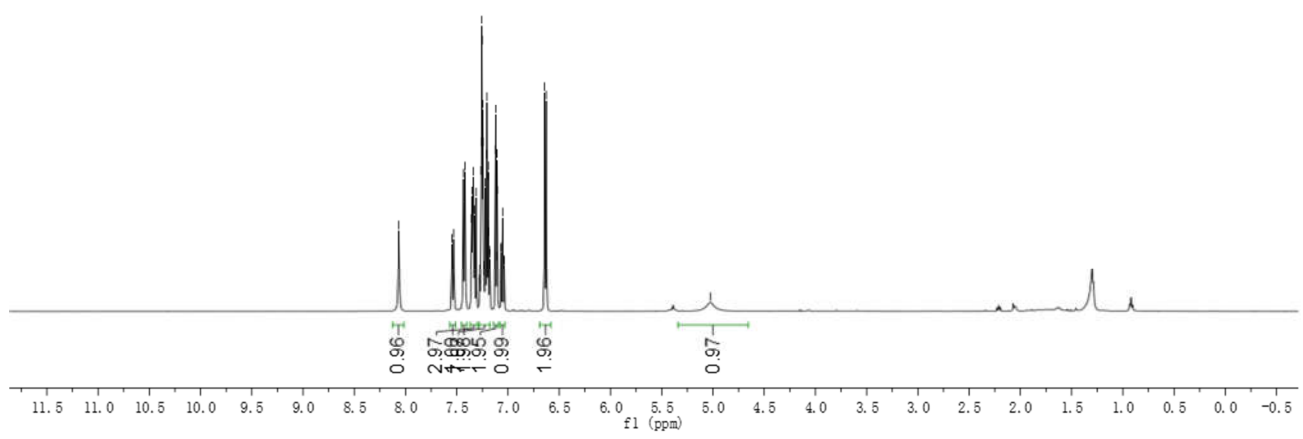

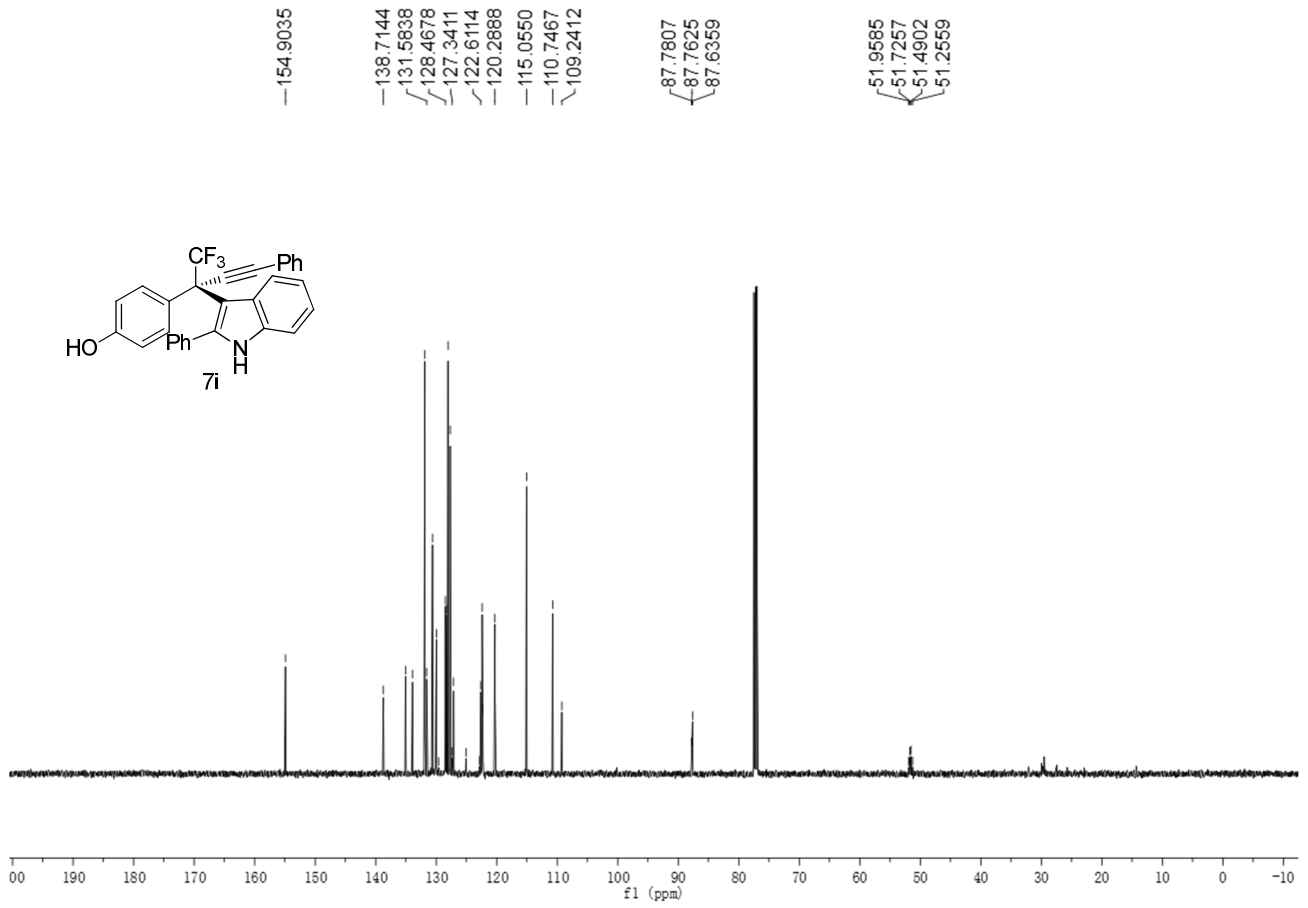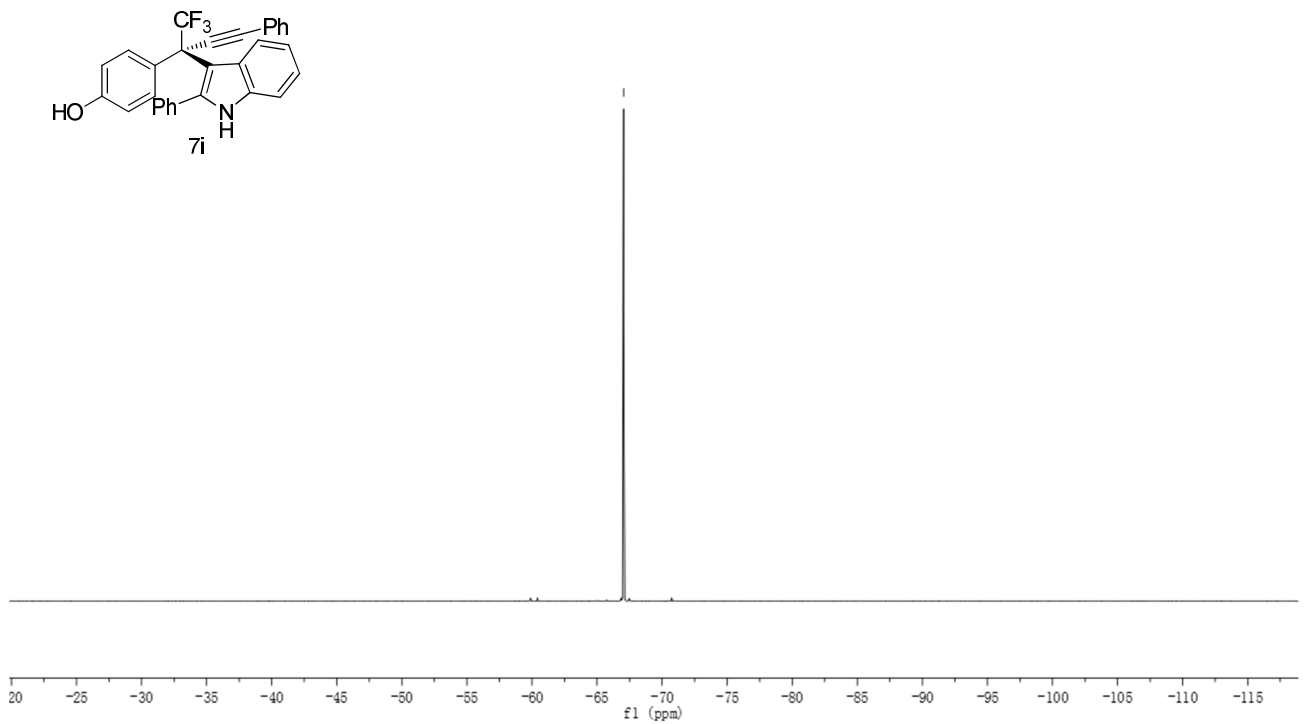

7.5677  
7.5645  
7.5533  
7.5489  
7.5139  
7.4966  
7.4031  
7.3875  
7.3752  
7.3621  
7.3514  
7.3443  
7.3238  
7.3102  
7.3066  
7.3007  
7.2935  
7.2895  
-6.9228  
-6.5468  
-6.2864  
-6.2787

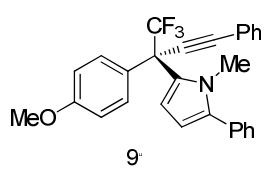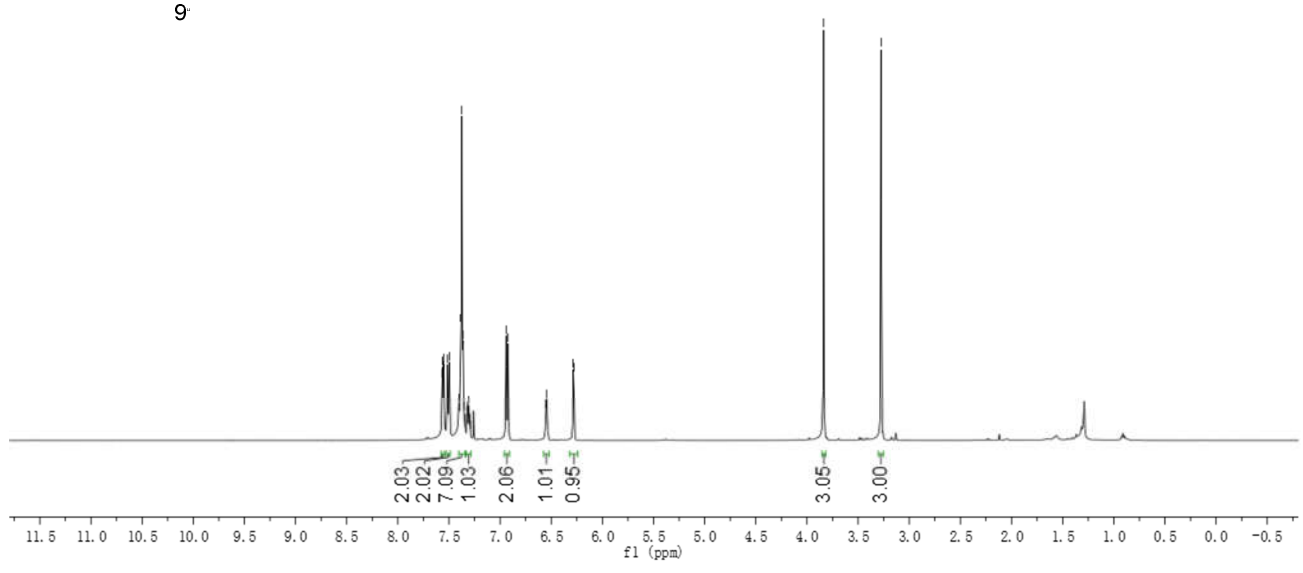

-3.8373  
-3.2754

160.0761  
128.6064  
128.4941  
127.9321  
127.3114  
127.2105  
126.2459  
123.9865  
122.3070  
121.7257  
114.0085  
109.0182  
108.9949  
107.7884  
87.2713  
84.6866  
55.4898  
52.7545  
52.5253  
52.2939  
52.0639  
33.6925

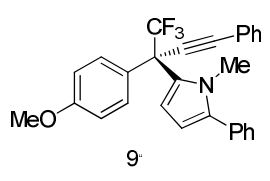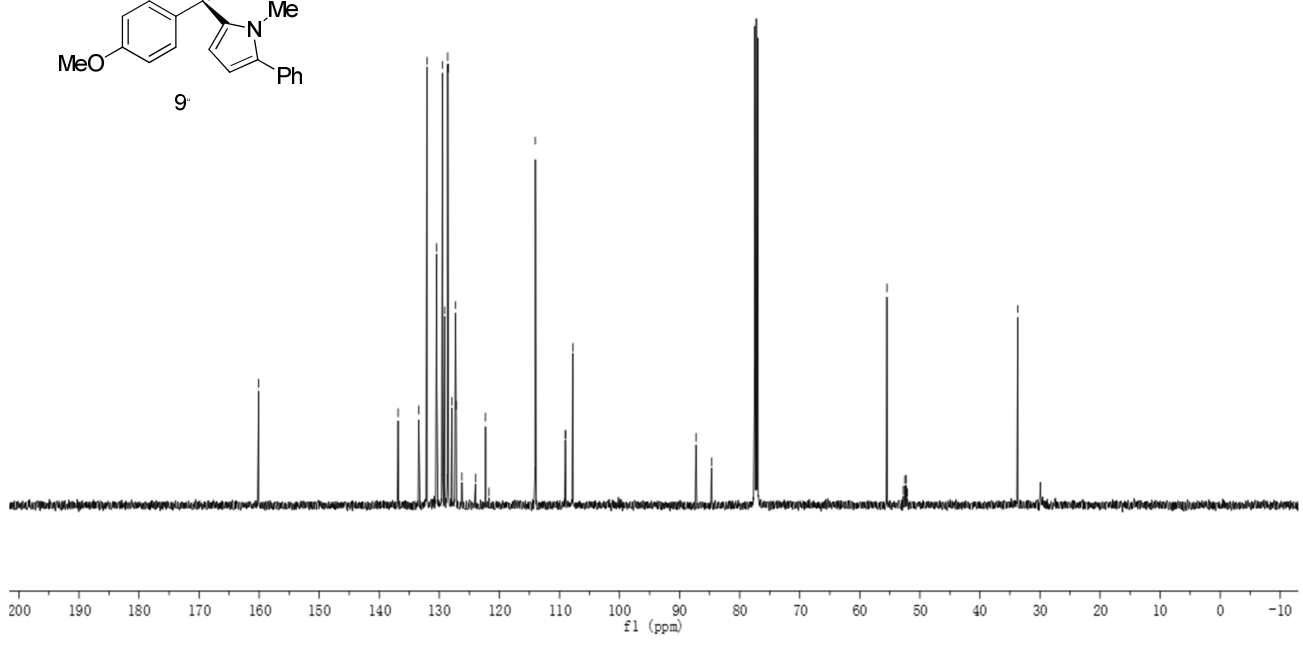



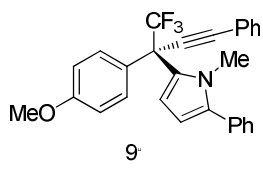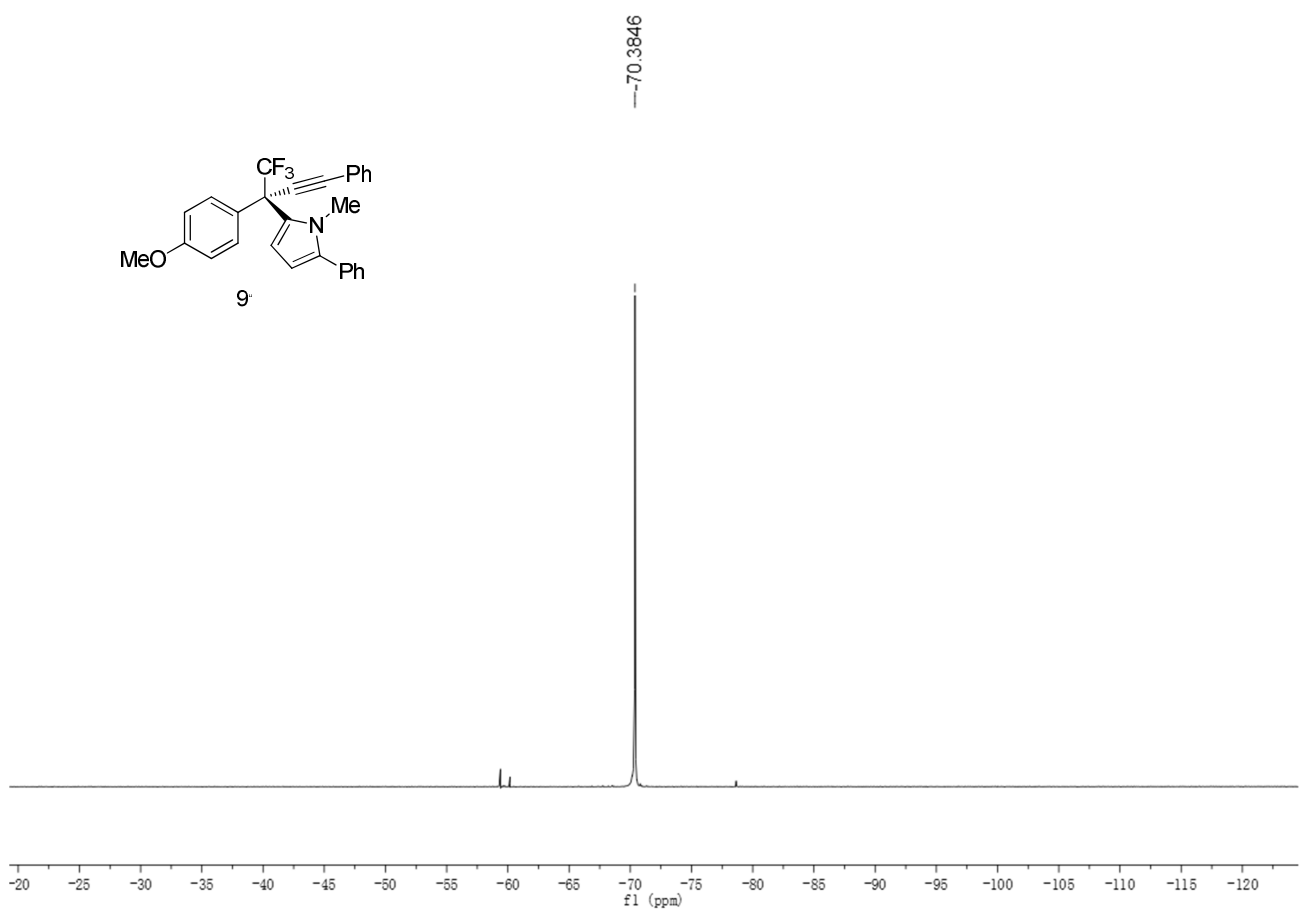

-8.1588  
 -7.5588  
 -7.4025  
 -7.3498  
 -7.3270  
 -7.2954  
 -7.2851  
 -7.1670  
 -7.0024  
 -6.9721  
 -6.7594  
 -4.9544

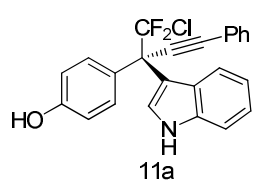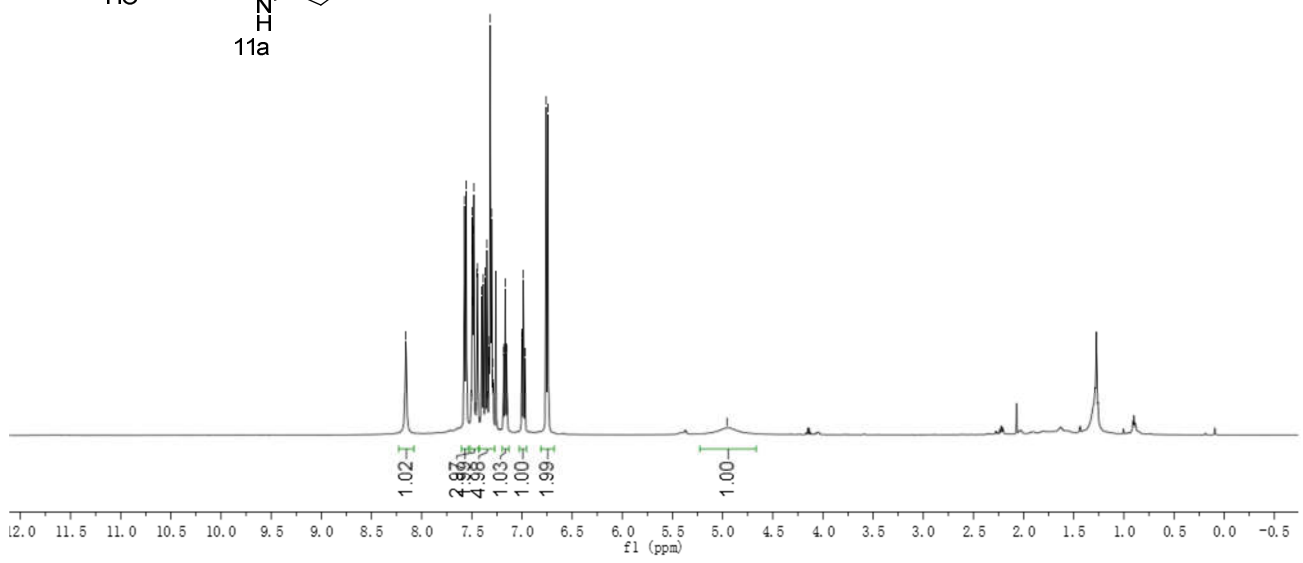

1.02  
 2.97  
 4.98  
 1.03  
 1.00  
 1.99  
 1.00

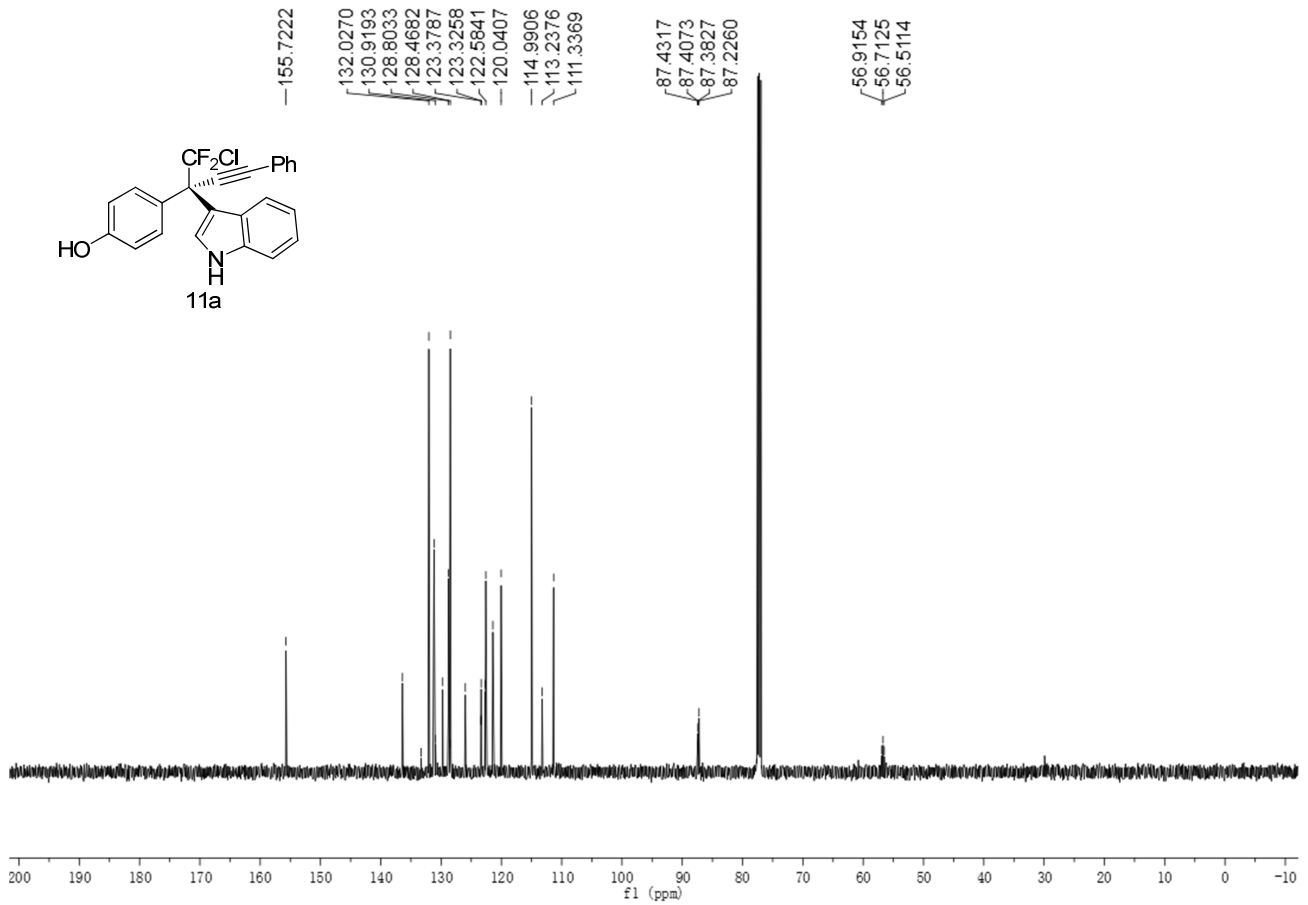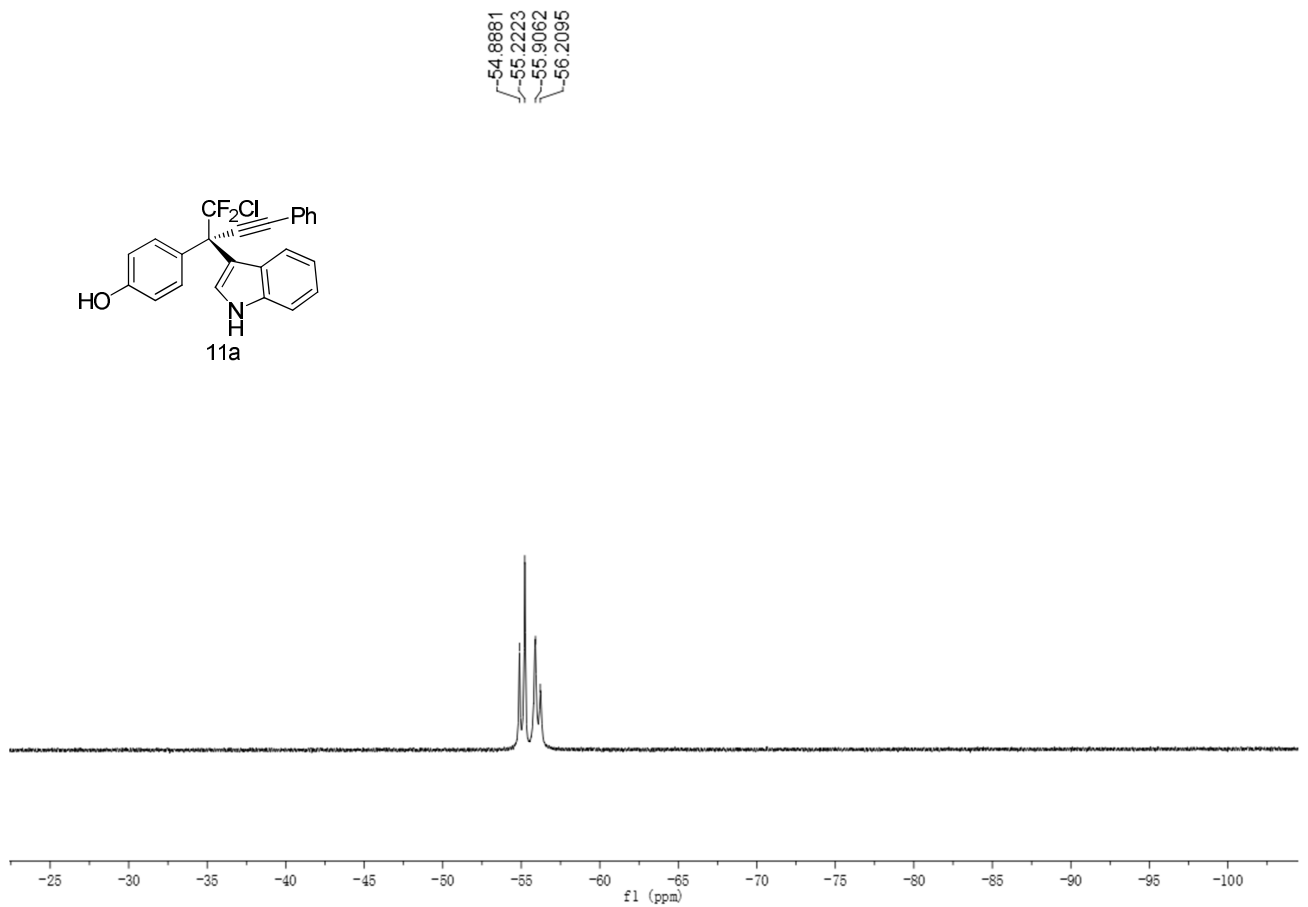

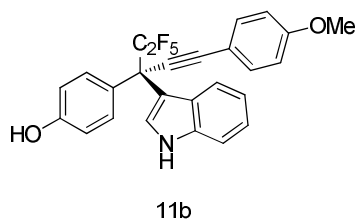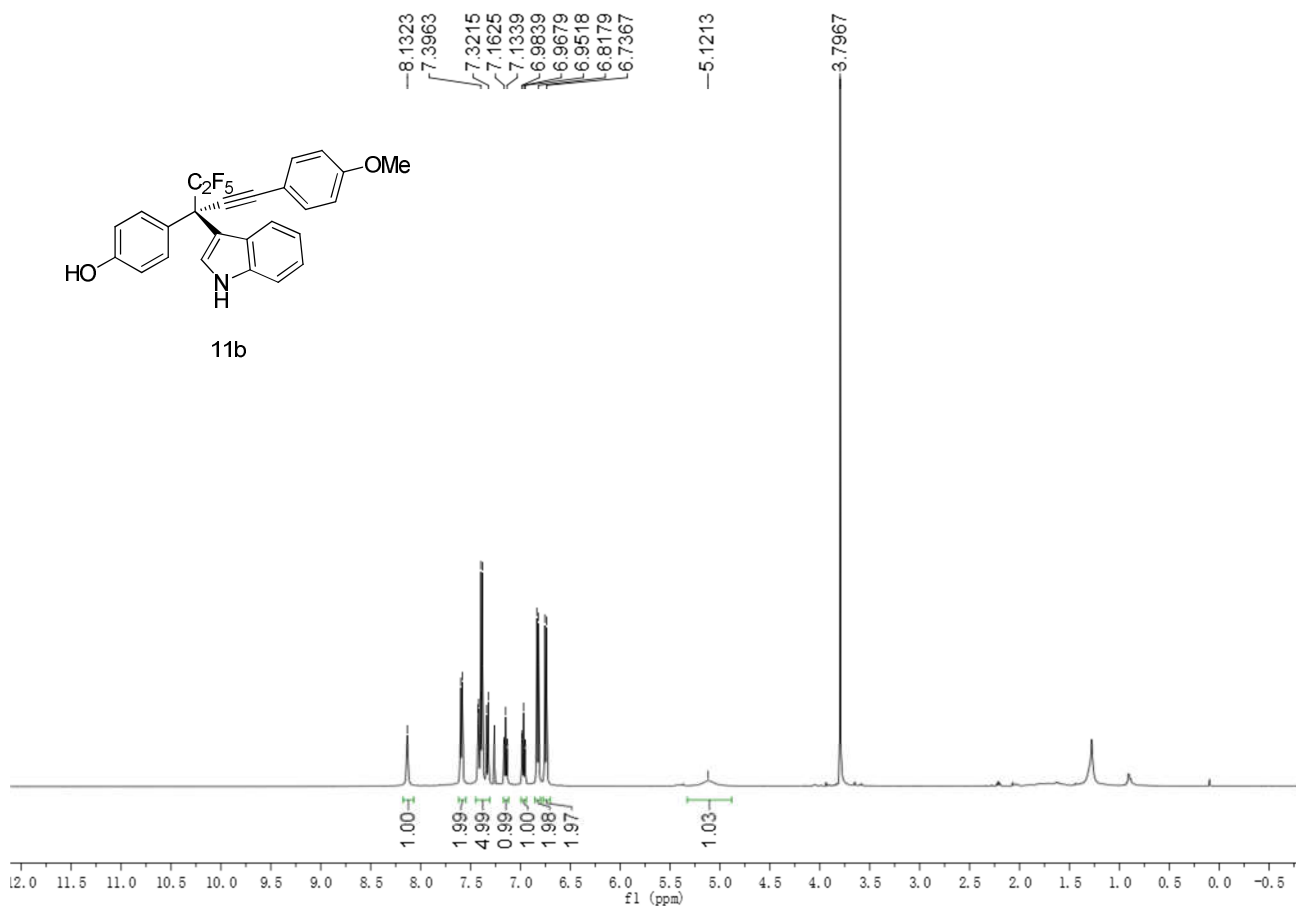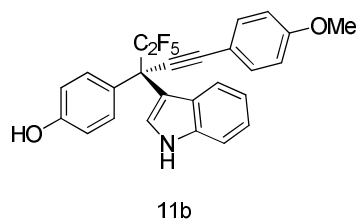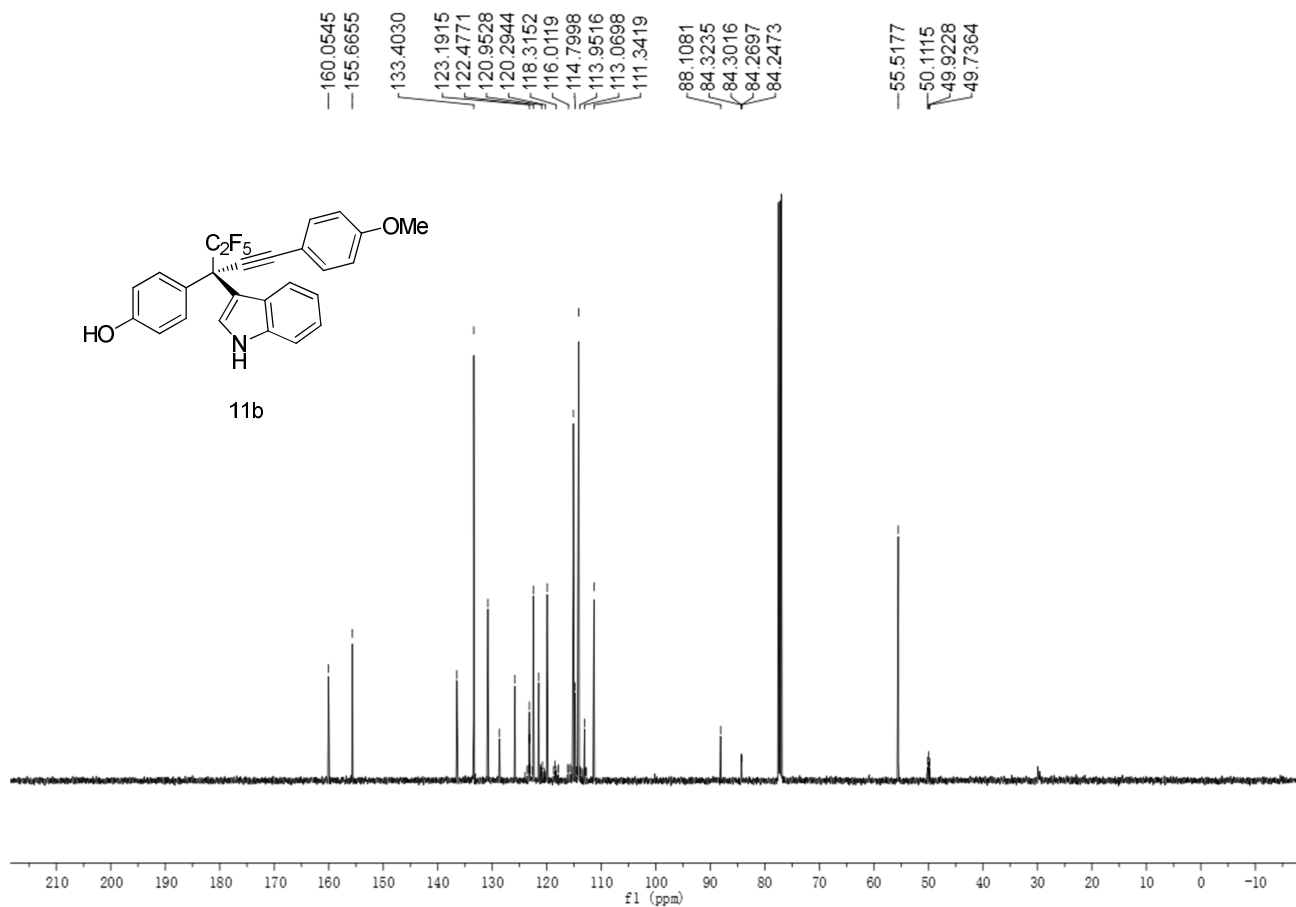

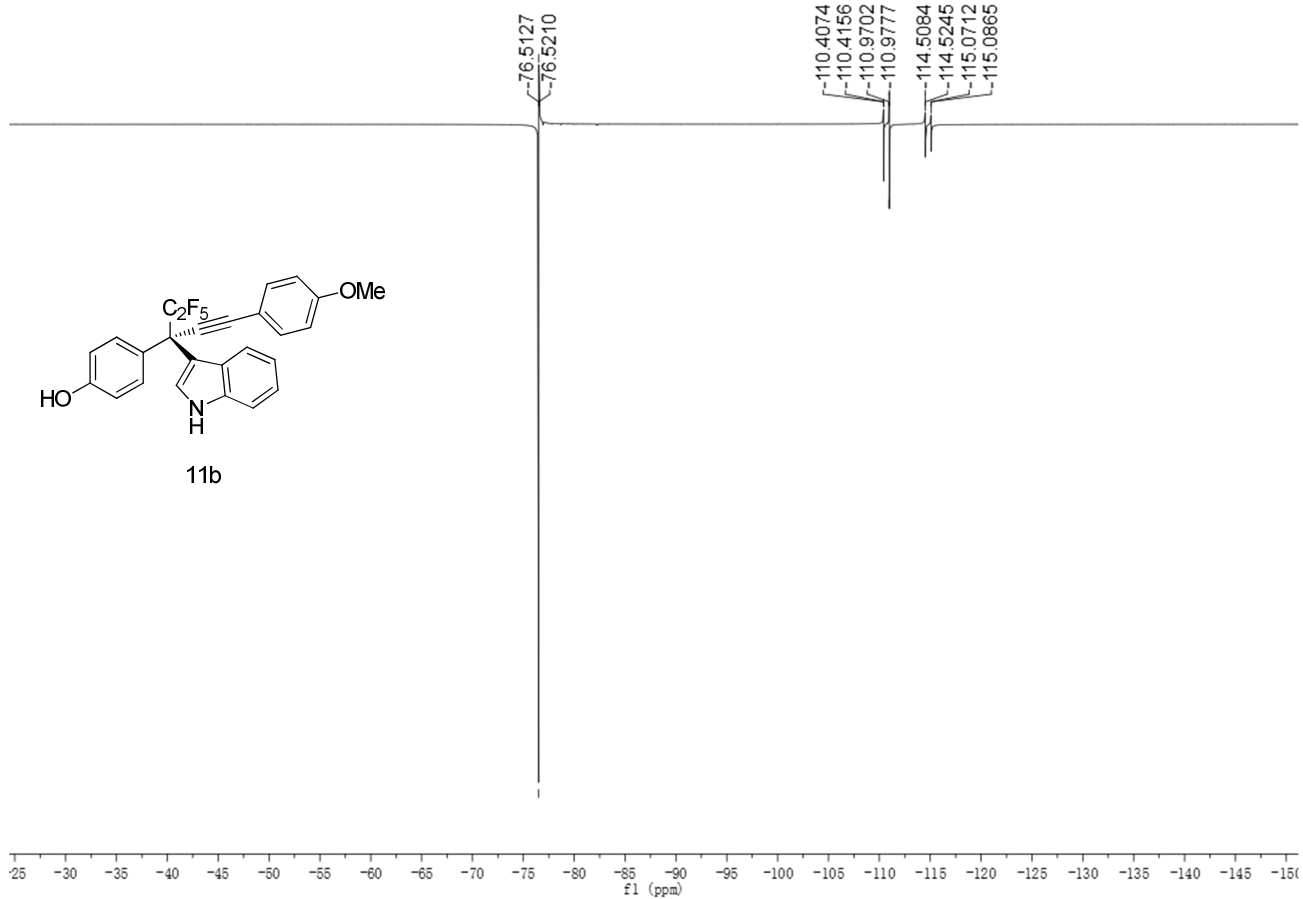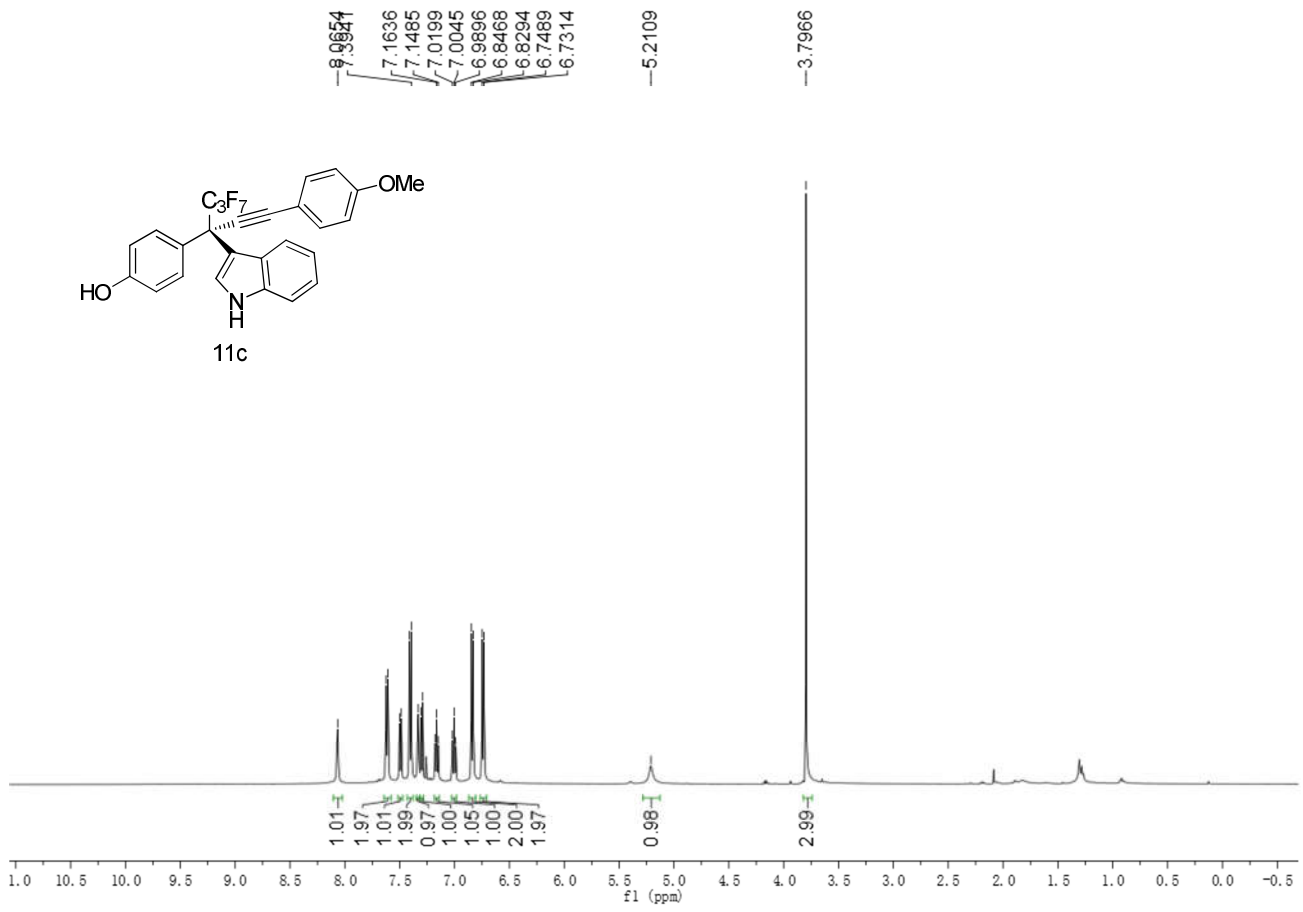

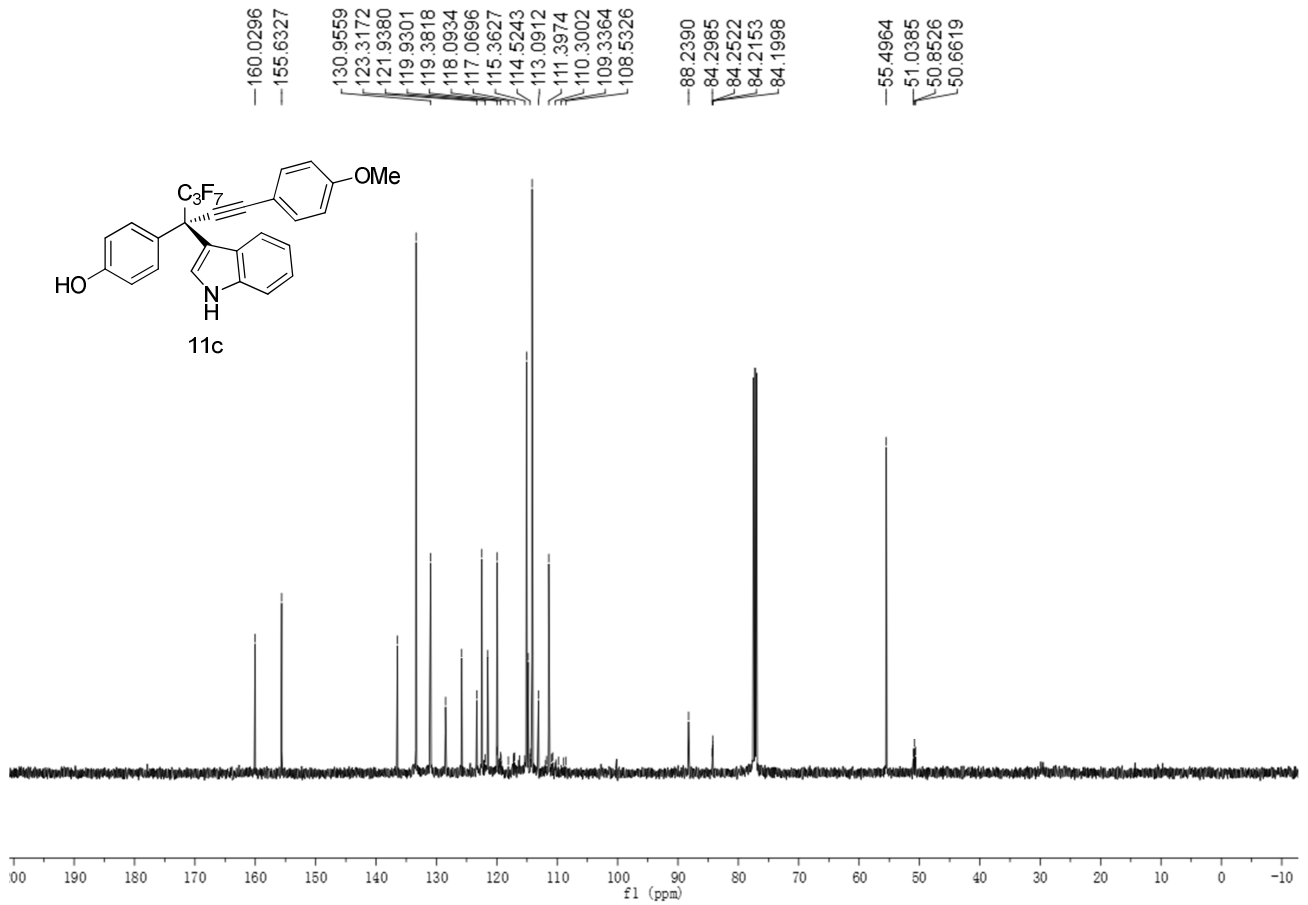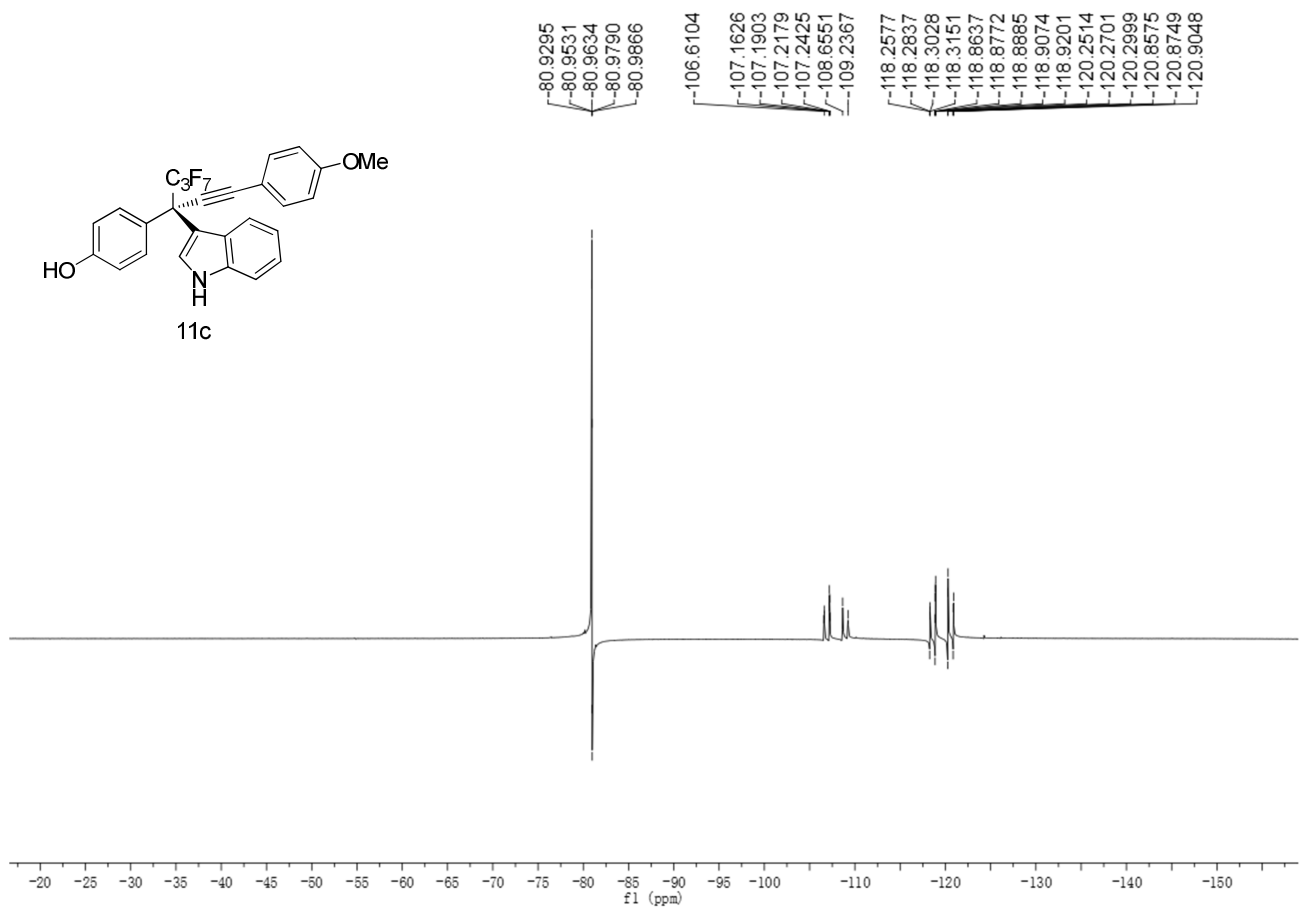

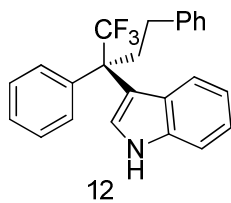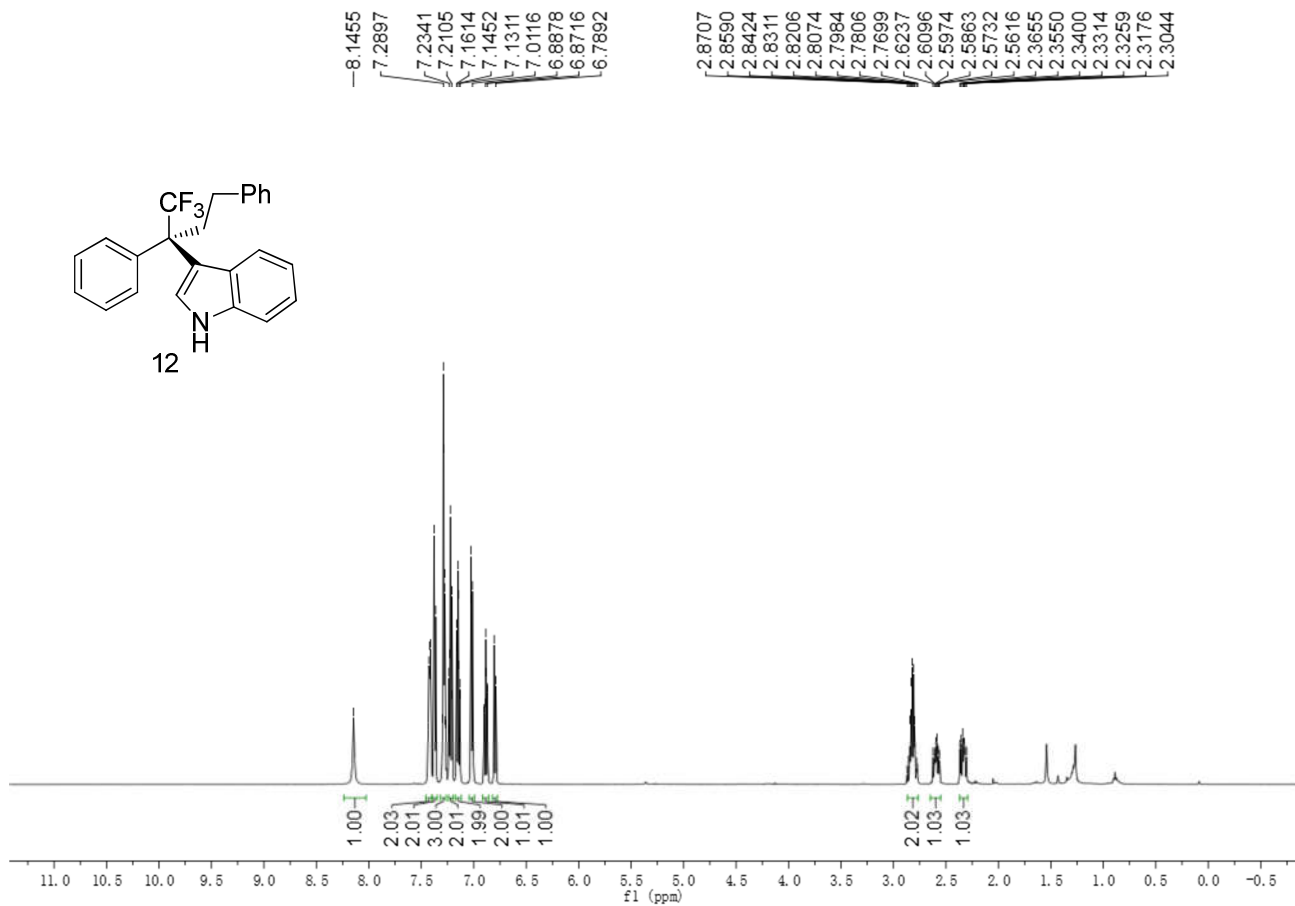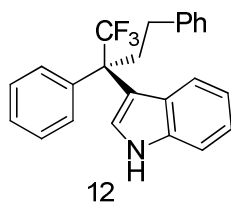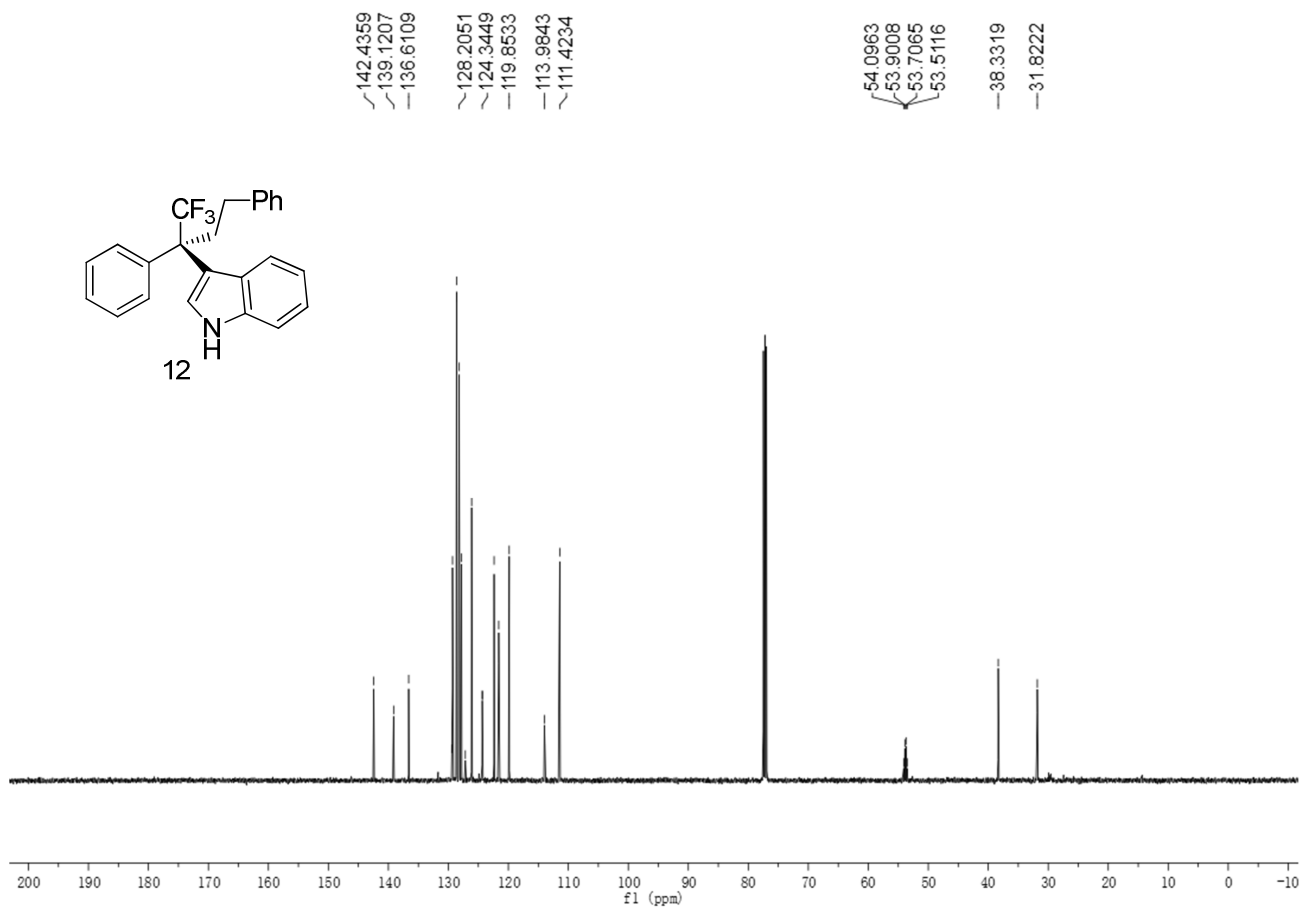

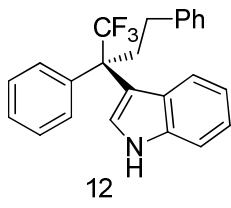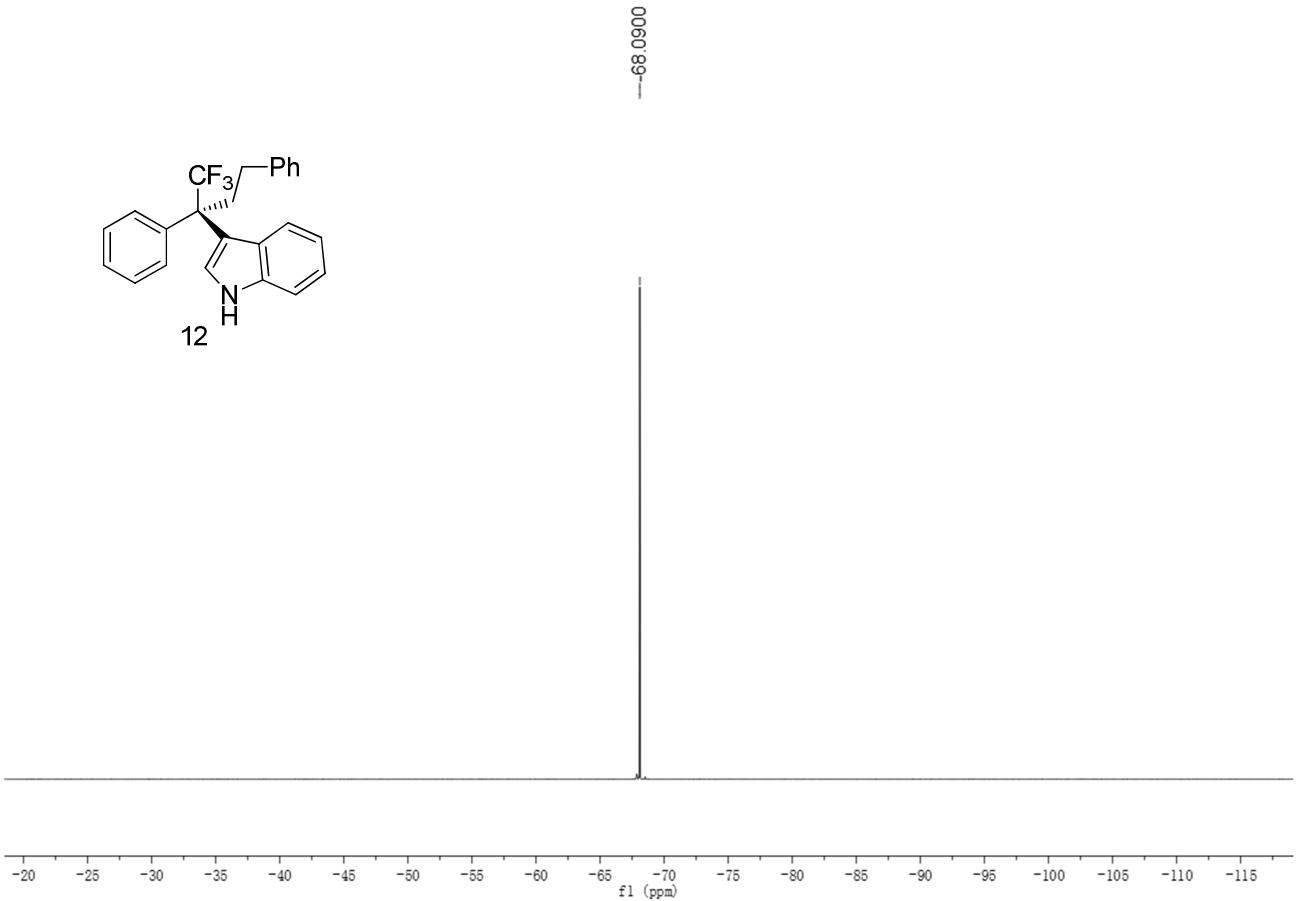

7.7171  
7.7004  
7.6047  
7.6022  
7.5859  
7.5693  
7.4674  
7.4636  
7.4574  
7.4530  
7.4481  
7.4430  
7.4397  
7.4067  
7.3917  
7.3905  
7.3773  
7.3437  
7.3378  
7.3354  
7.3303  
7.3230  
7.3184  
7.3165  
7.3032  
7.2889  
7.2671  
7.2508  
7.0952  
7.0935  
7.0792  
7.0649  
7.0631  
6.8765  
6.8750  
6.8686  
6.8606  
6.8462  
6.8446

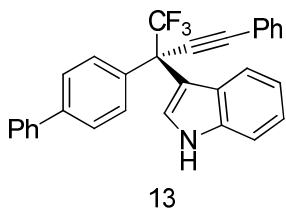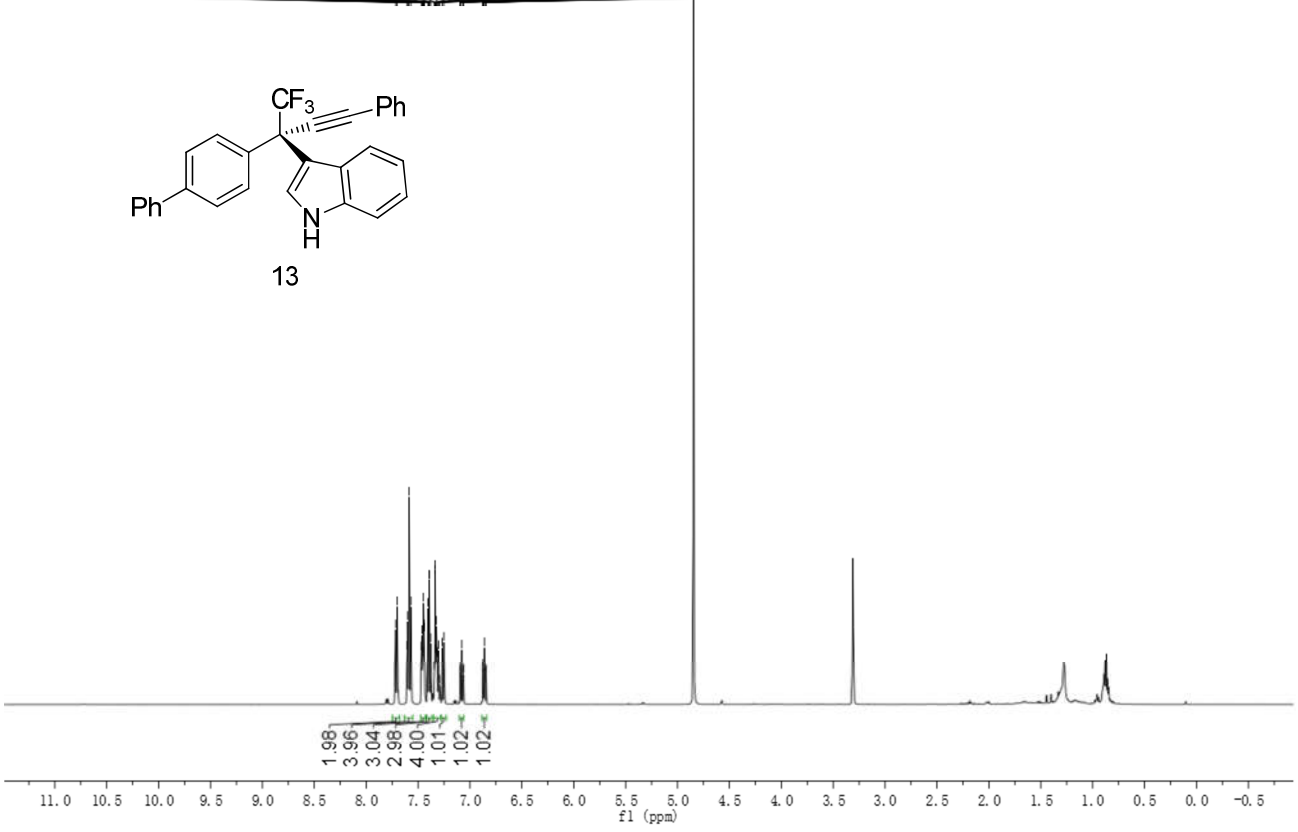

1.98  
3.96  
3.04  
2.98  
4.00  
1.01  
1.02  
1.02

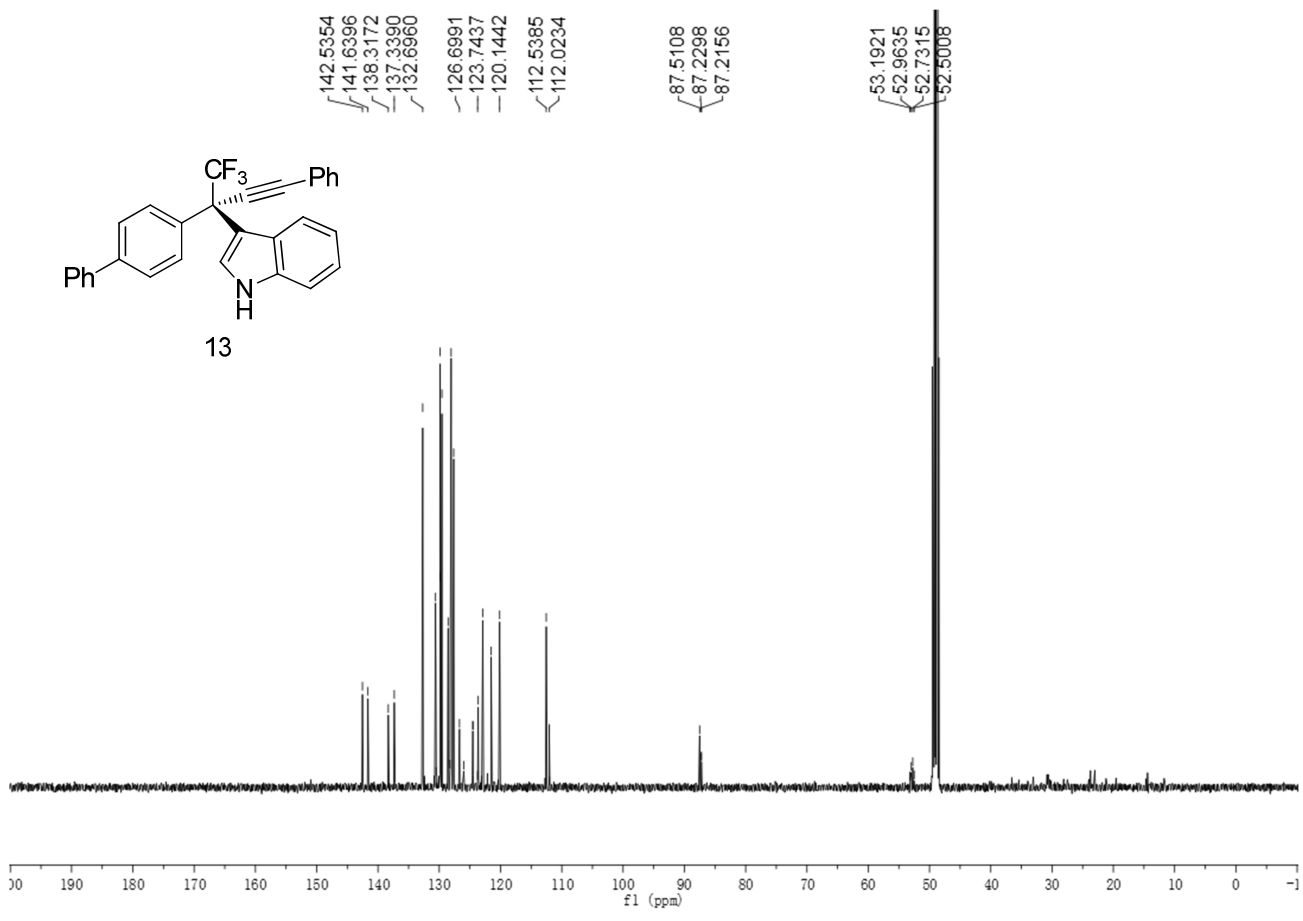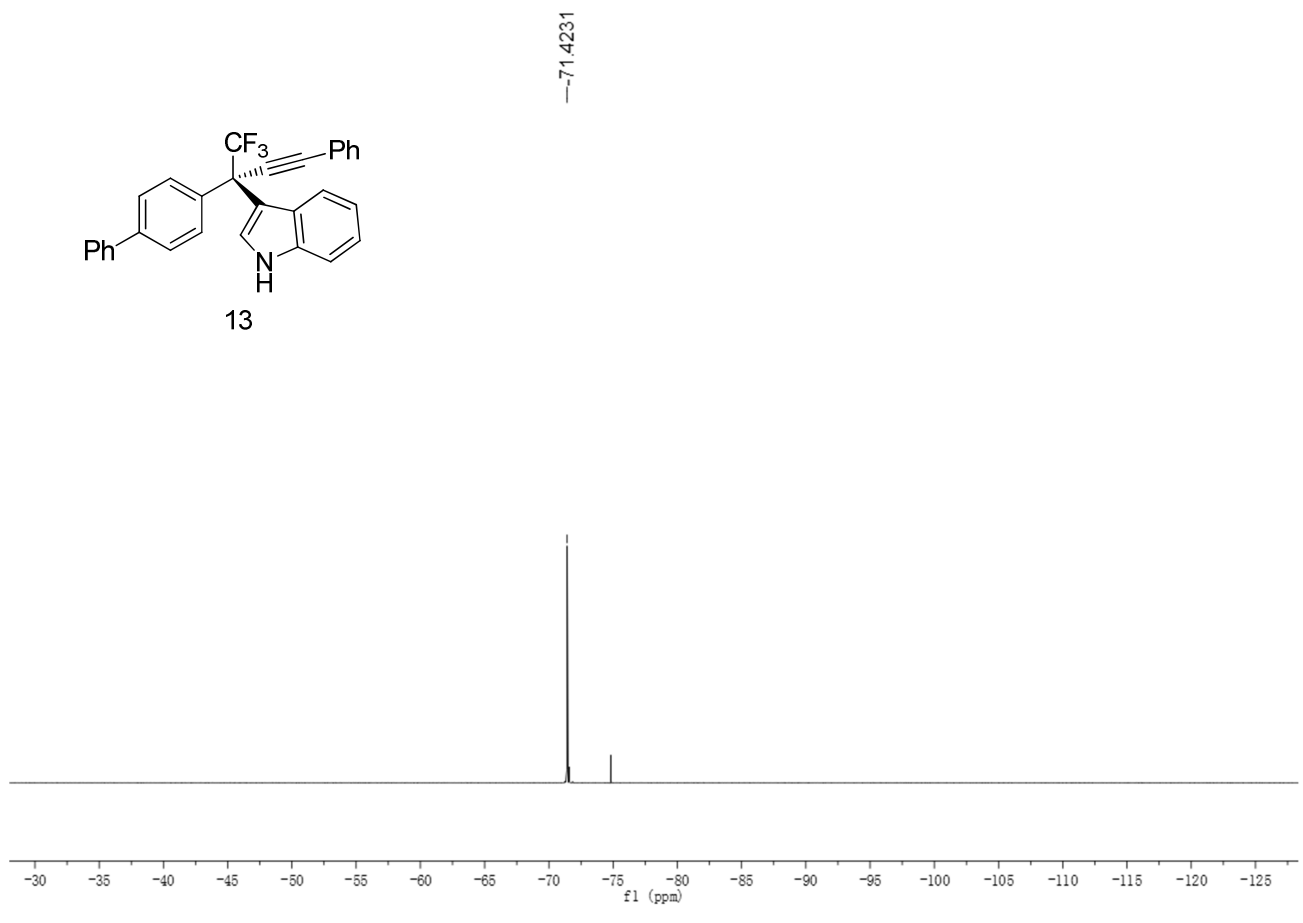



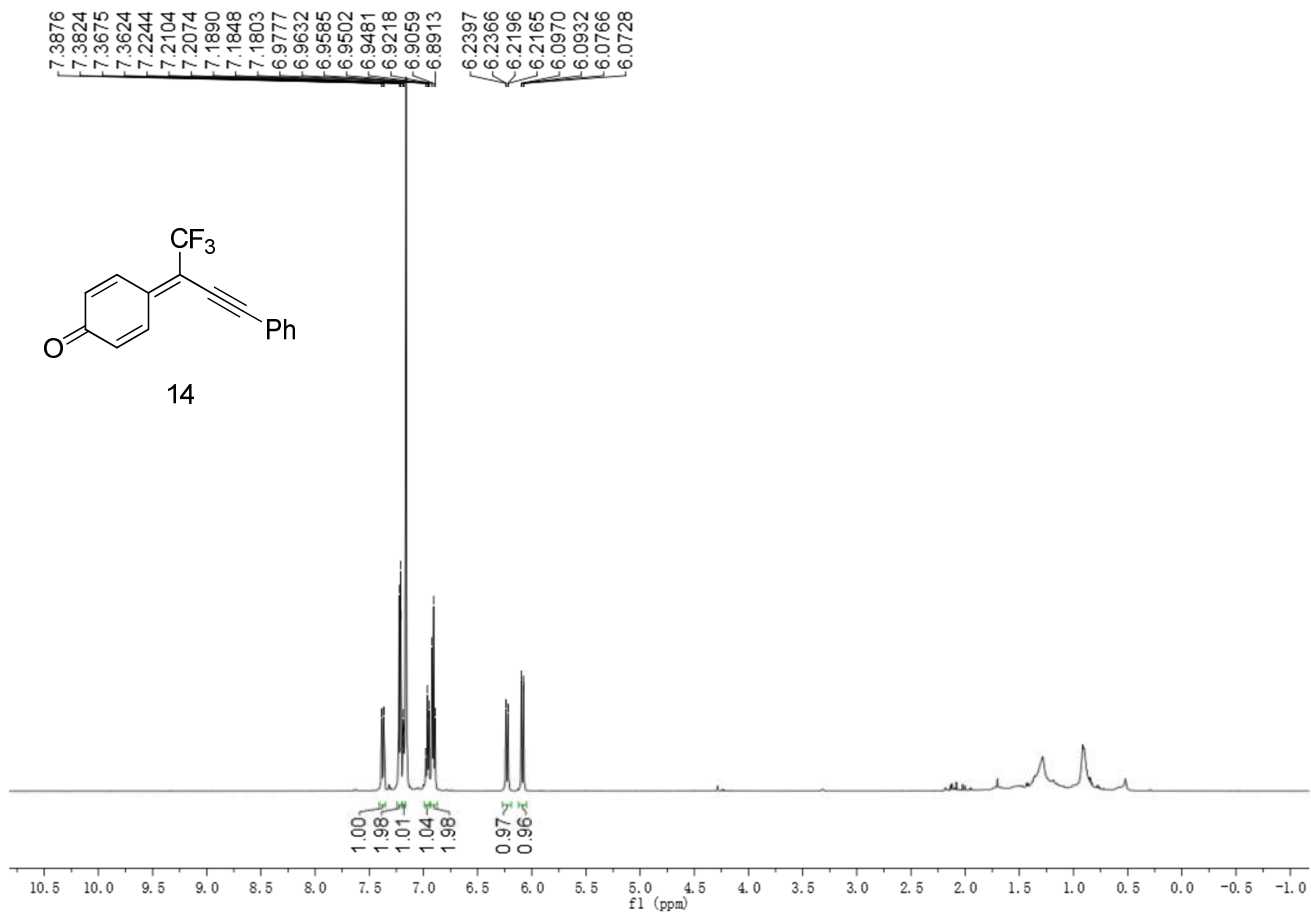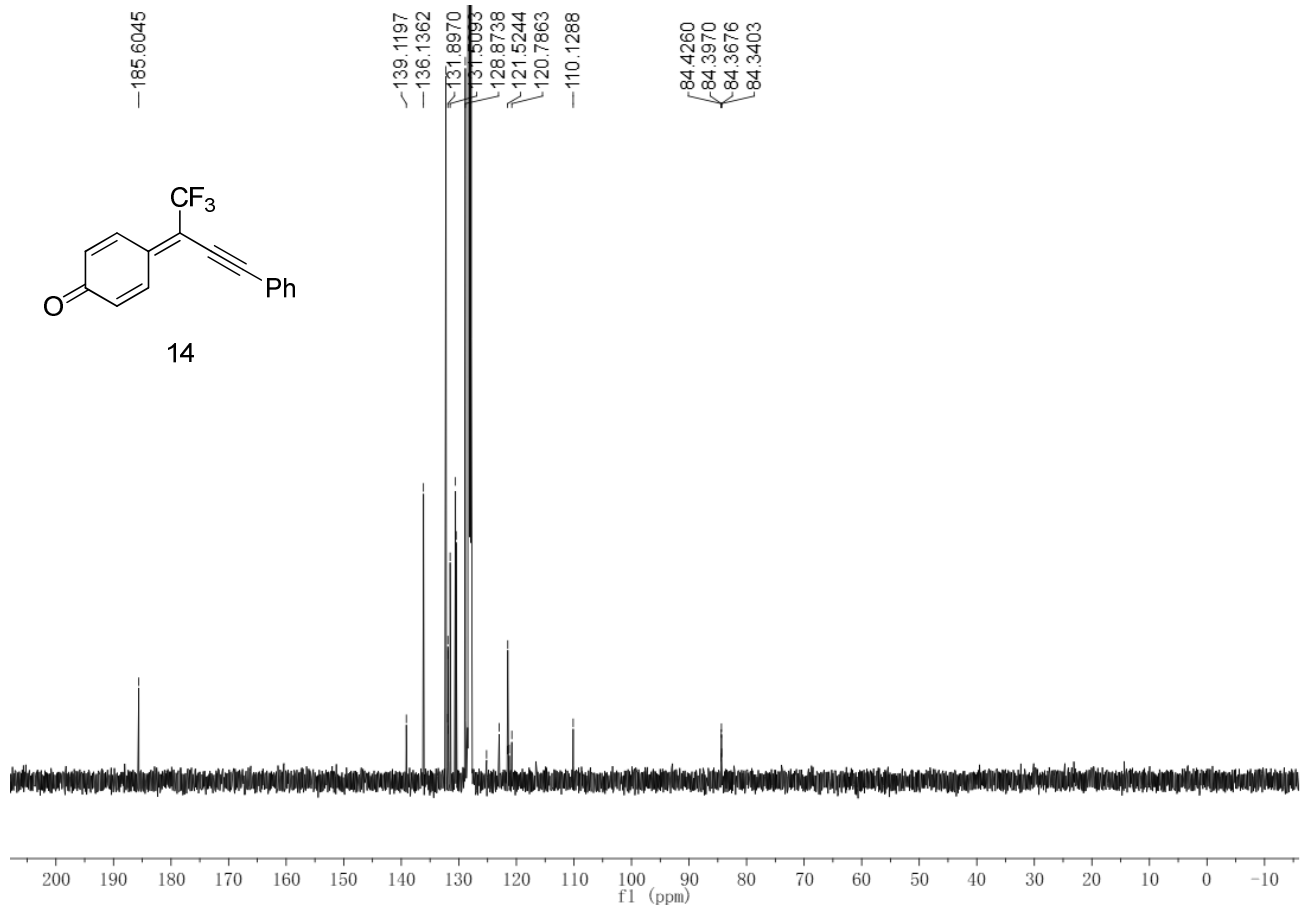

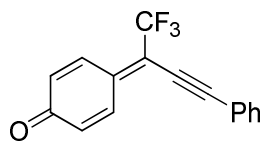

14

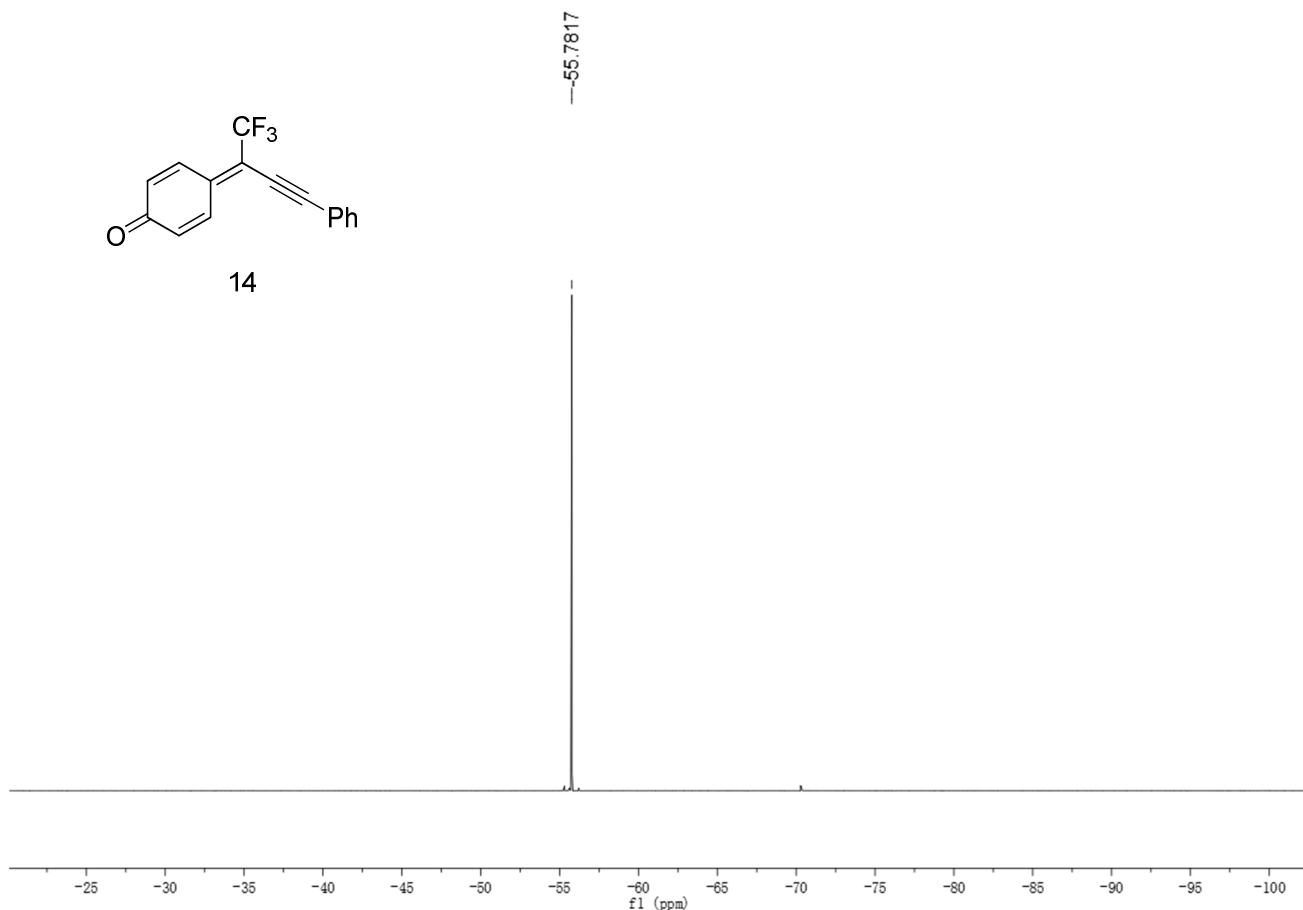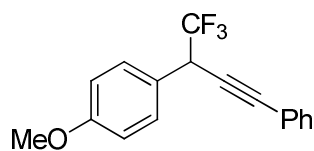

15

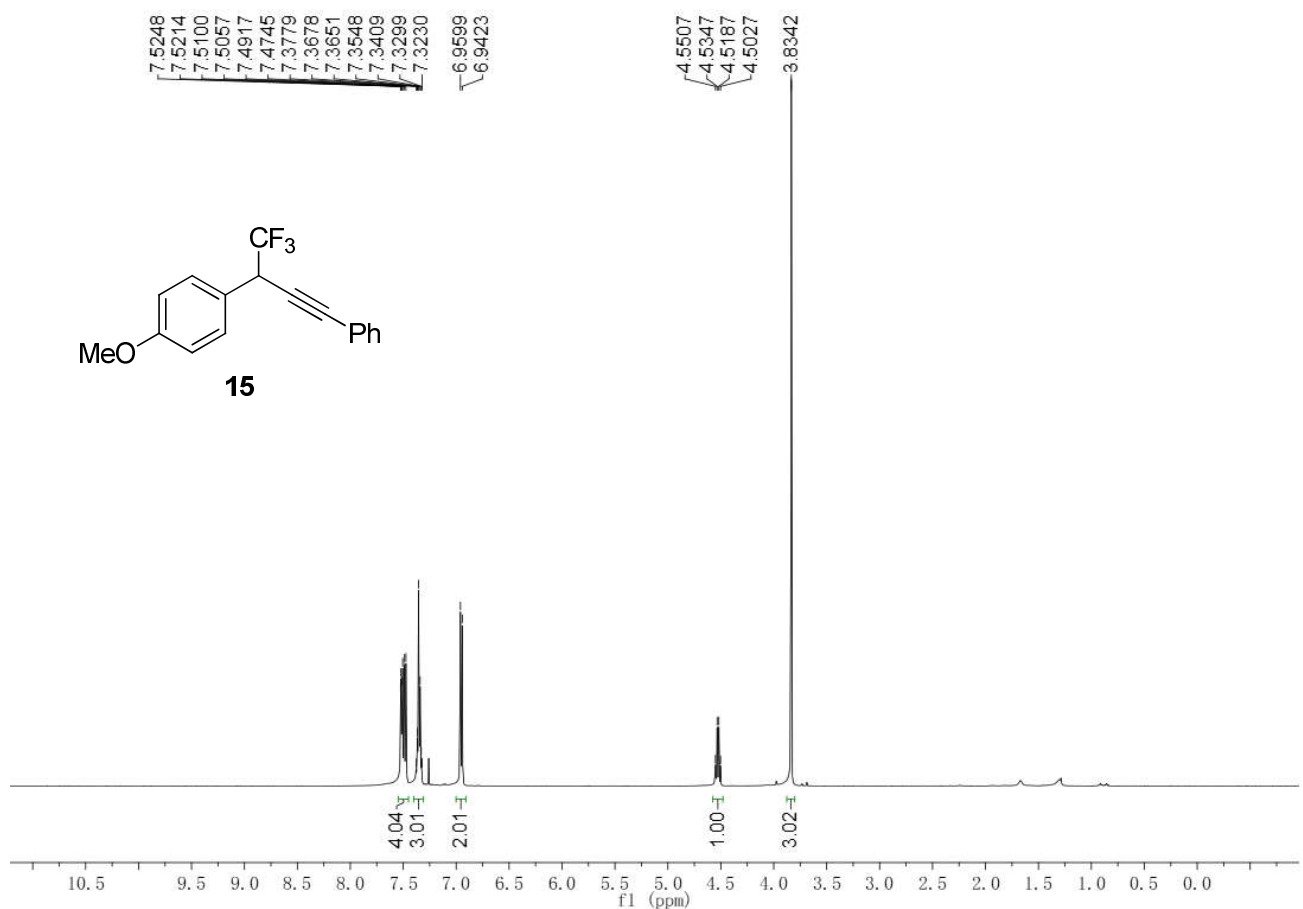

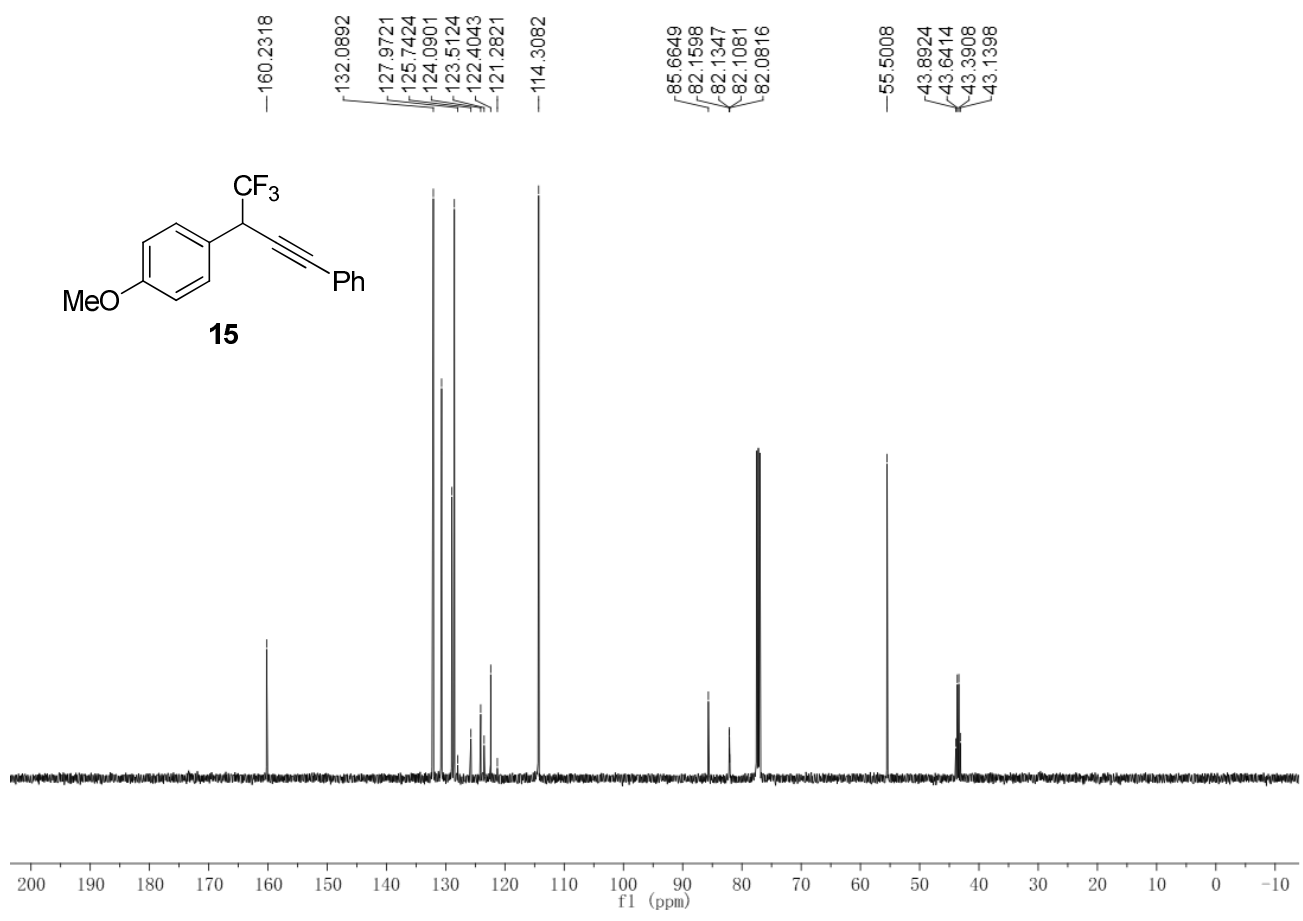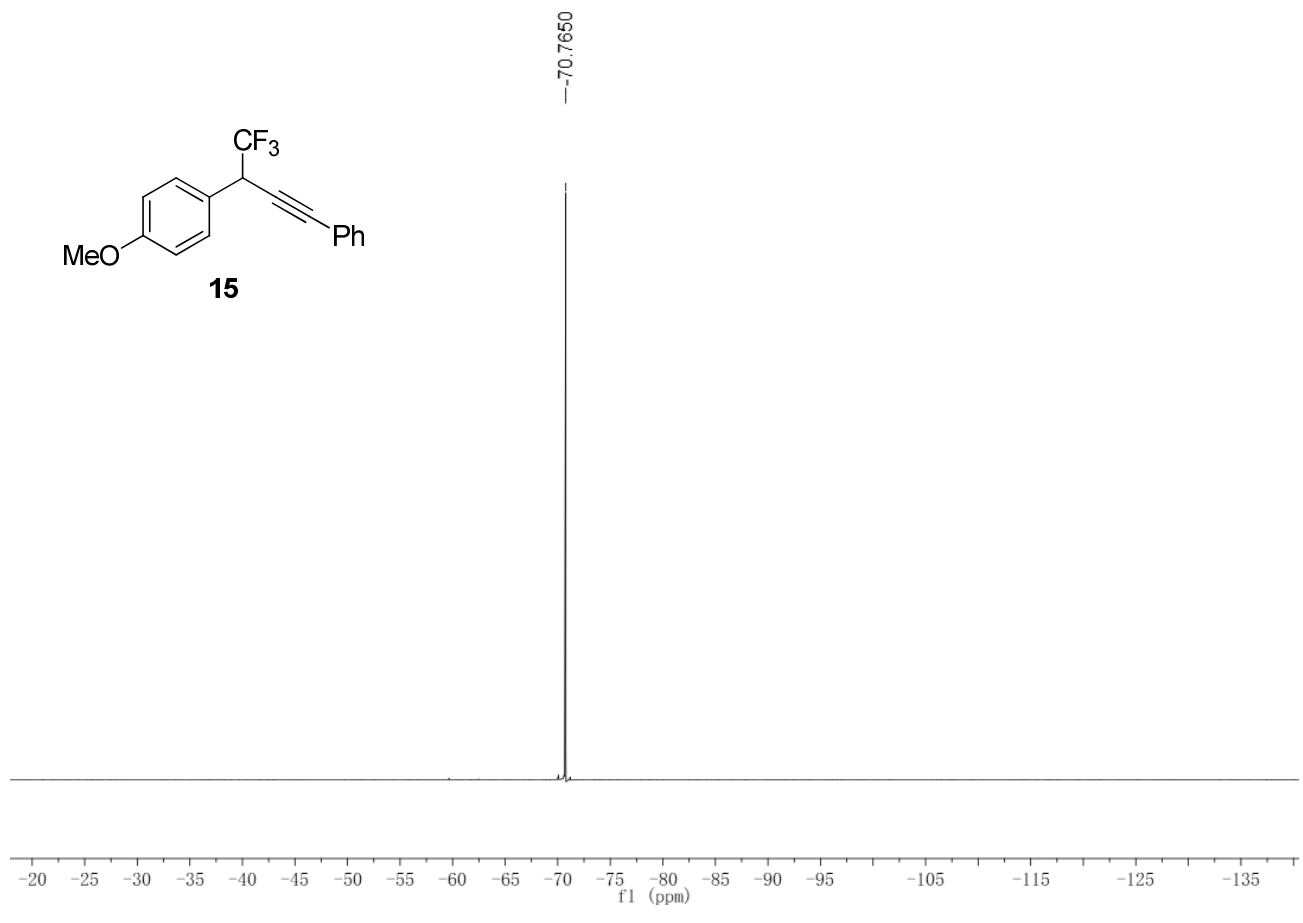

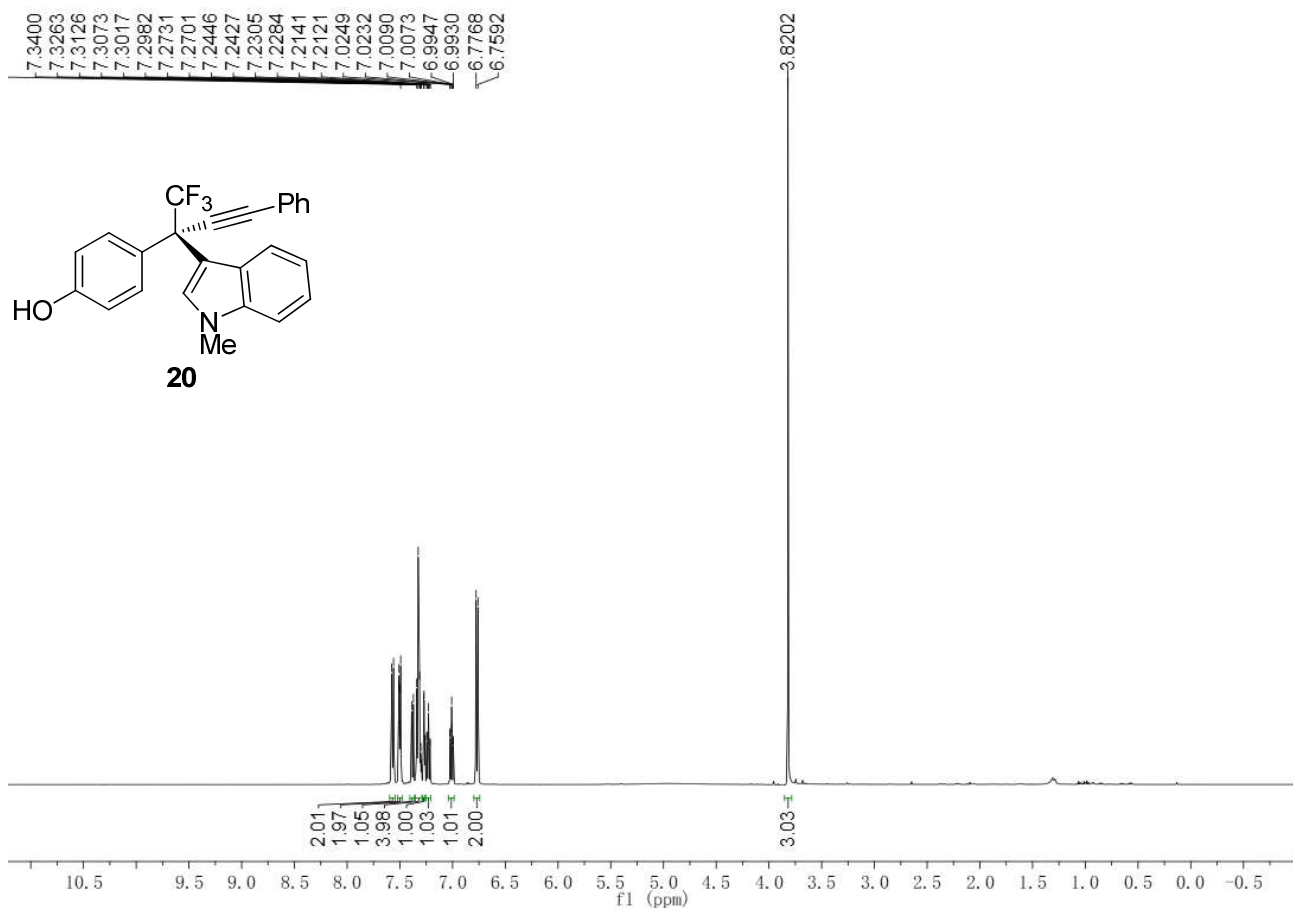

155.6697, 137.4218, 128.4350, 126.9432, 122.6498, 119.5912, 115.1358, 110.7706, 109.5448, 86.4306, 51.5536, 51.3198, 51.0894, 50.8539, 33.0930

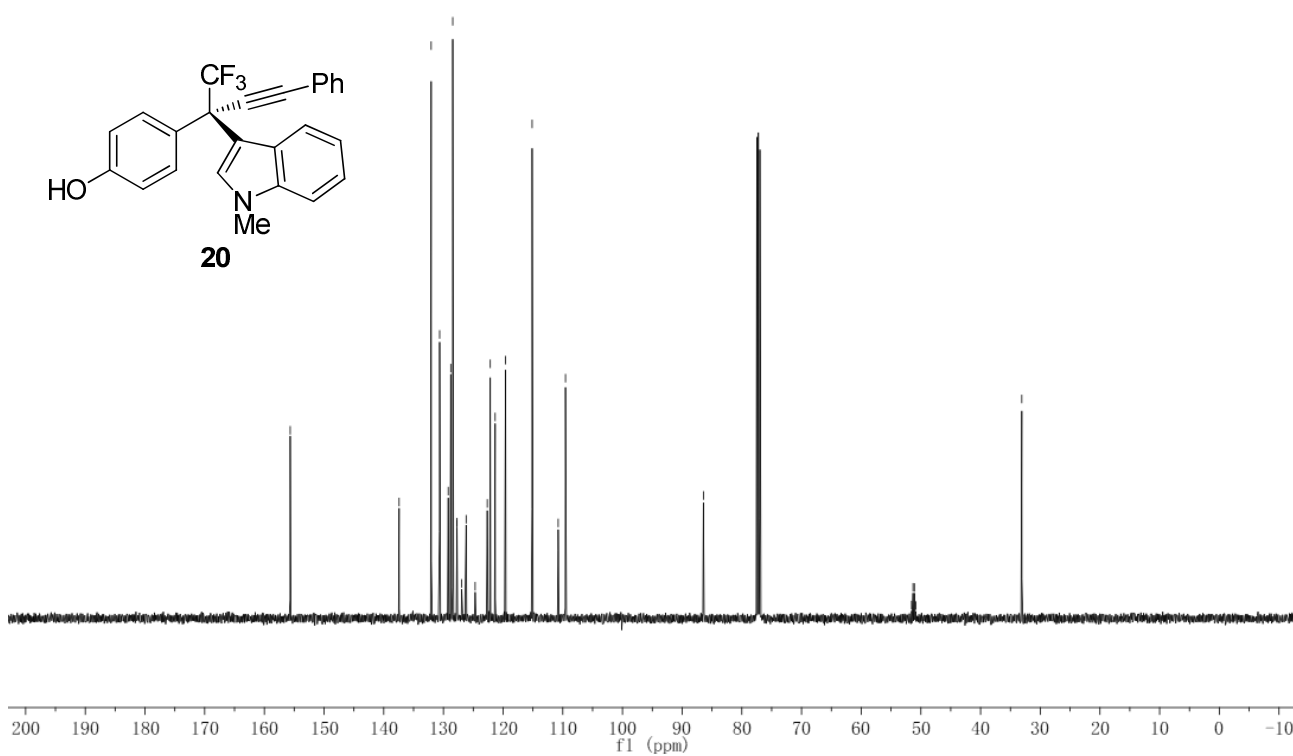

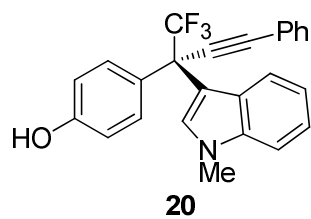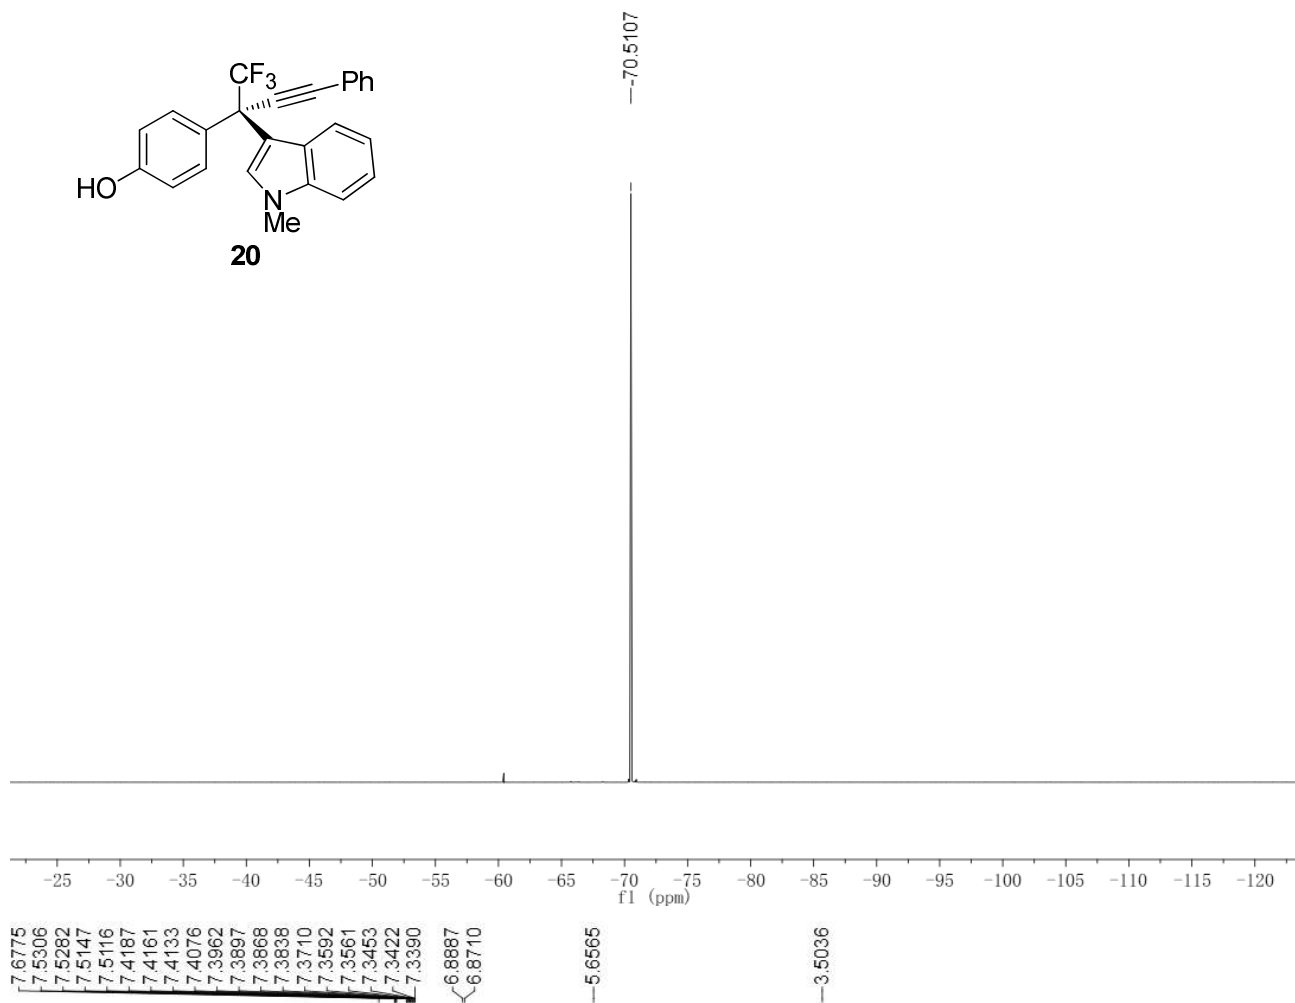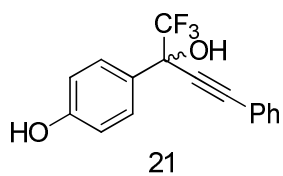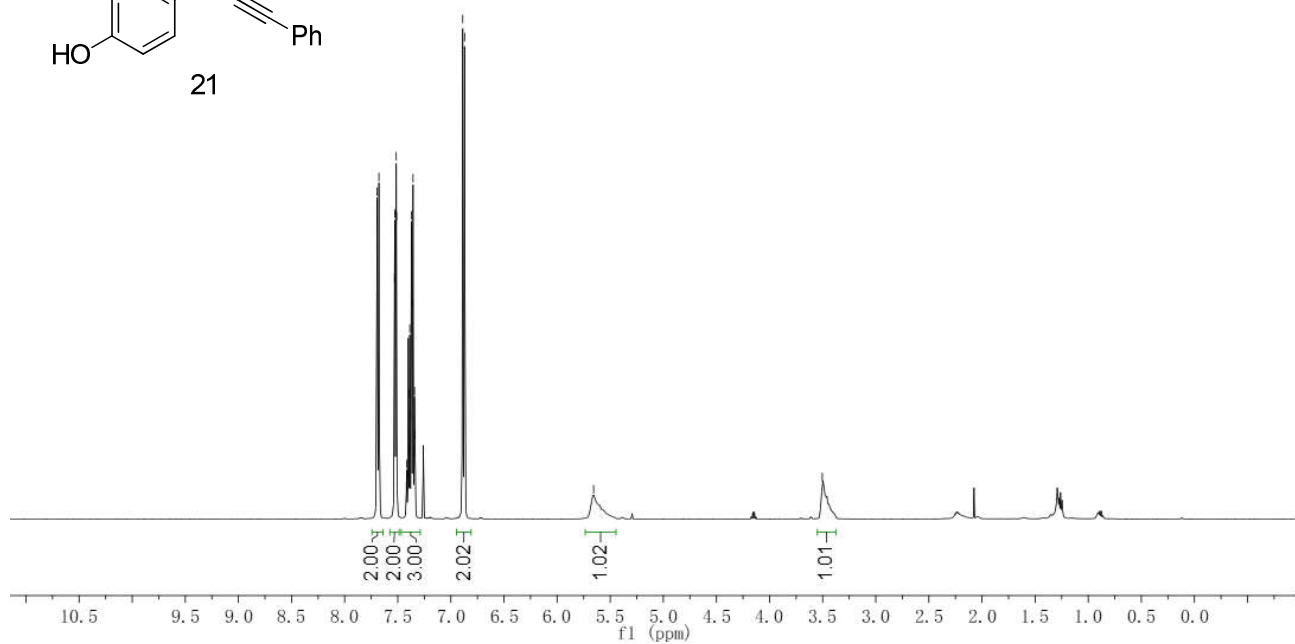

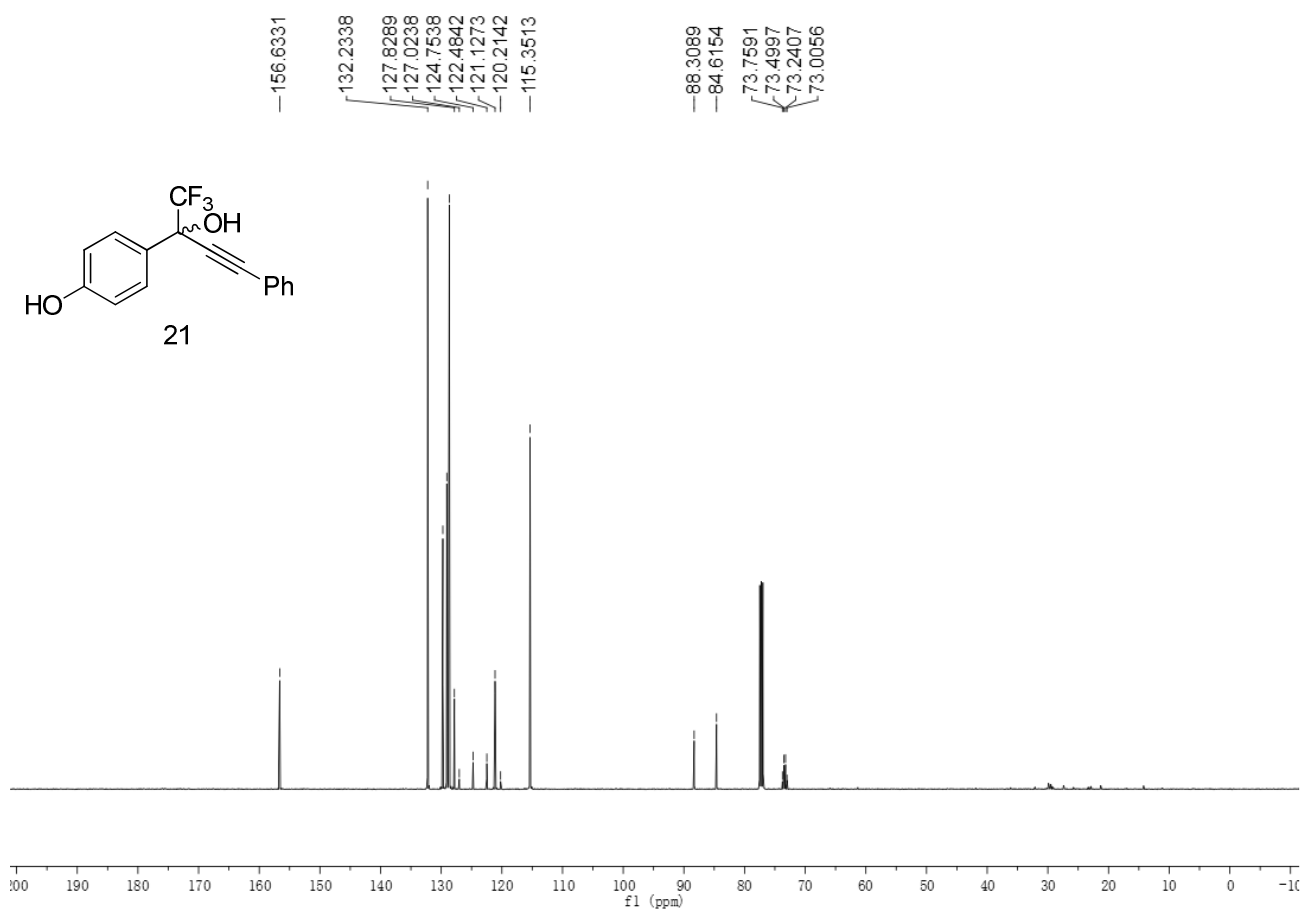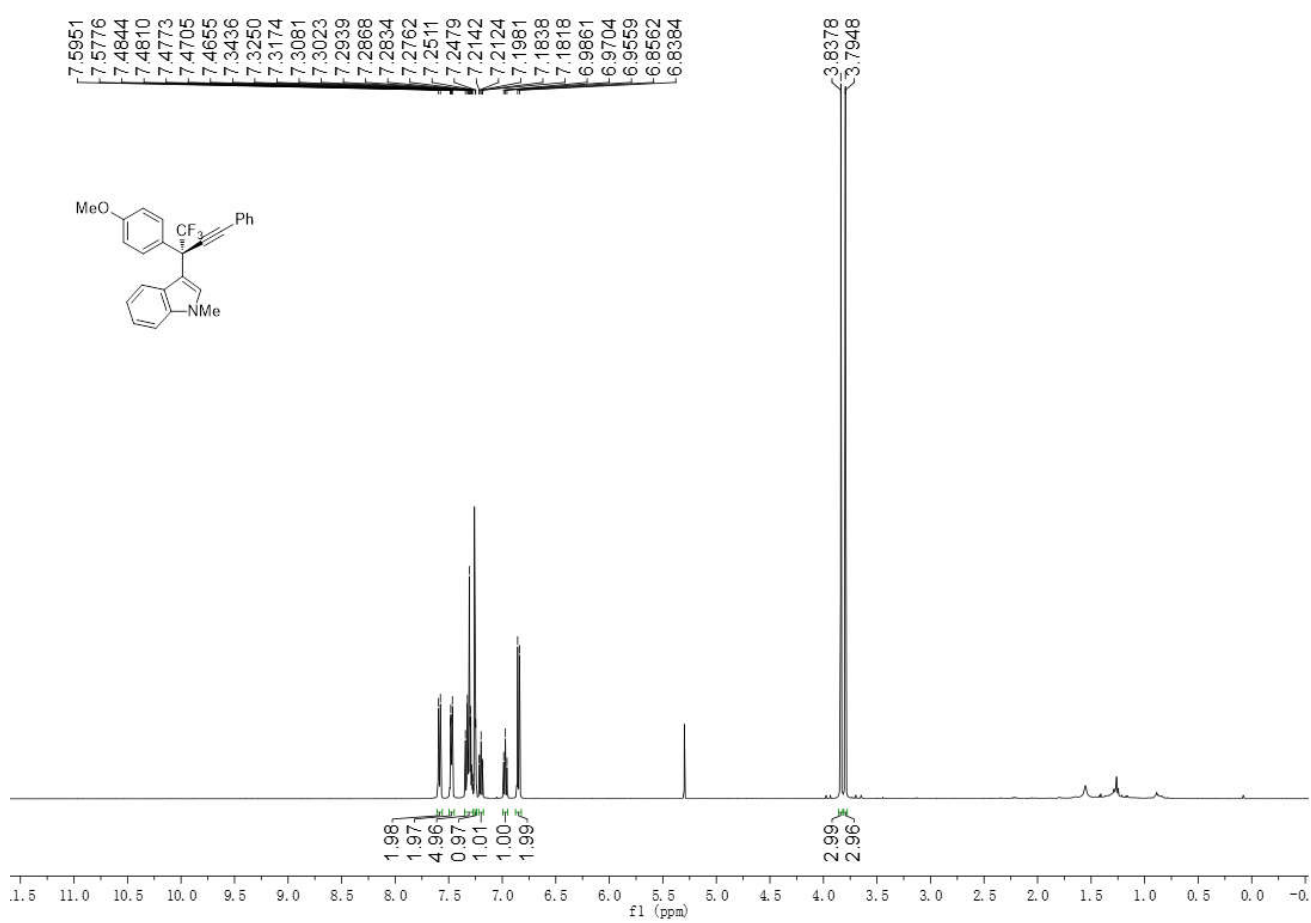

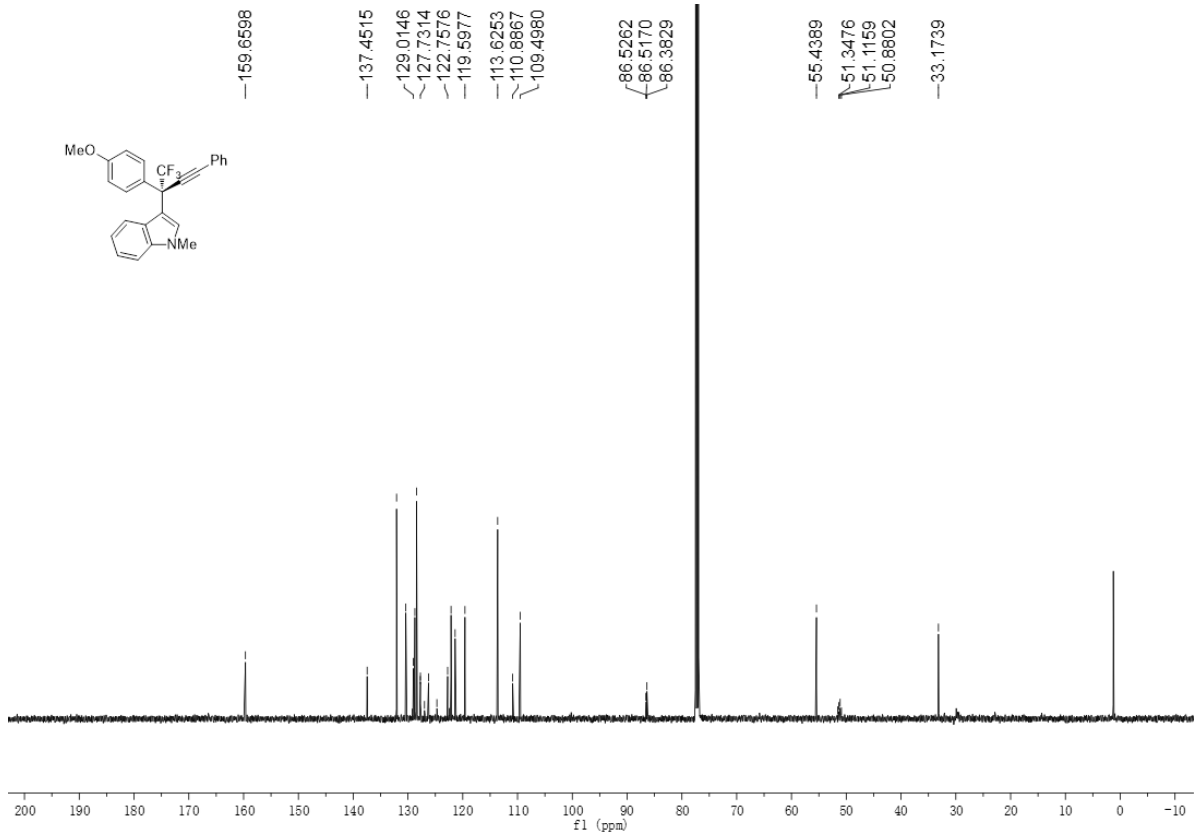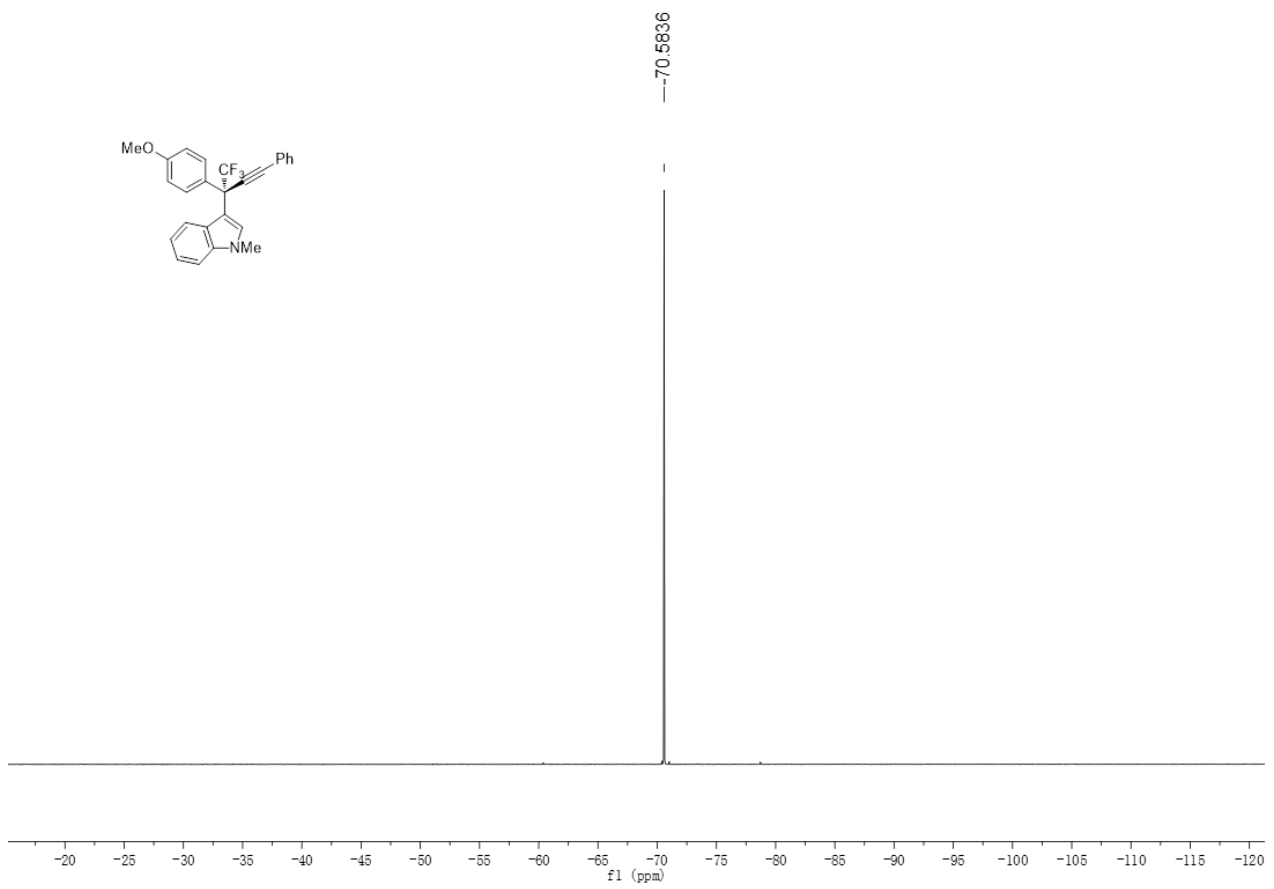

## HPLC spectra for ee determination

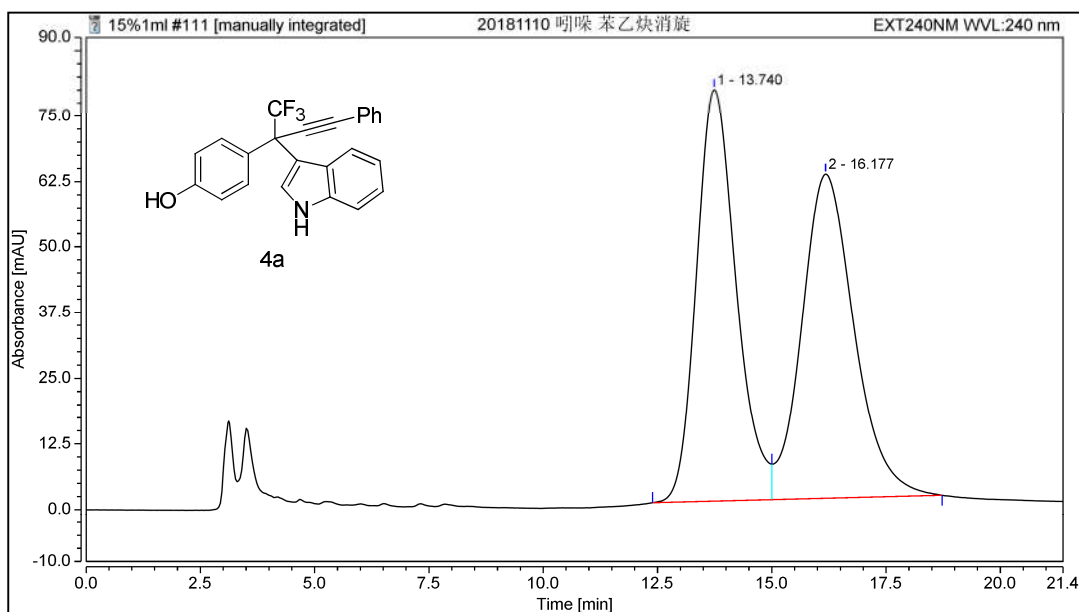

### Integration Results

| No.           | Peak Name | Retention Time<br>min | Area<br>mAU*min | Relative Area<br>% | Amount<br>n.a. |
|---------------|-----------|-----------------------|-----------------|--------------------|----------------|
| 1             |           | 13.740                | 78.782          | 49.04              | n.a.           |
| 2             |           | 16.177                | 81.864          | 50.96              | n.a.           |
| <b>Total:</b> |           |                       | <b>160.646</b>  | <b>100.00</b>      |                |

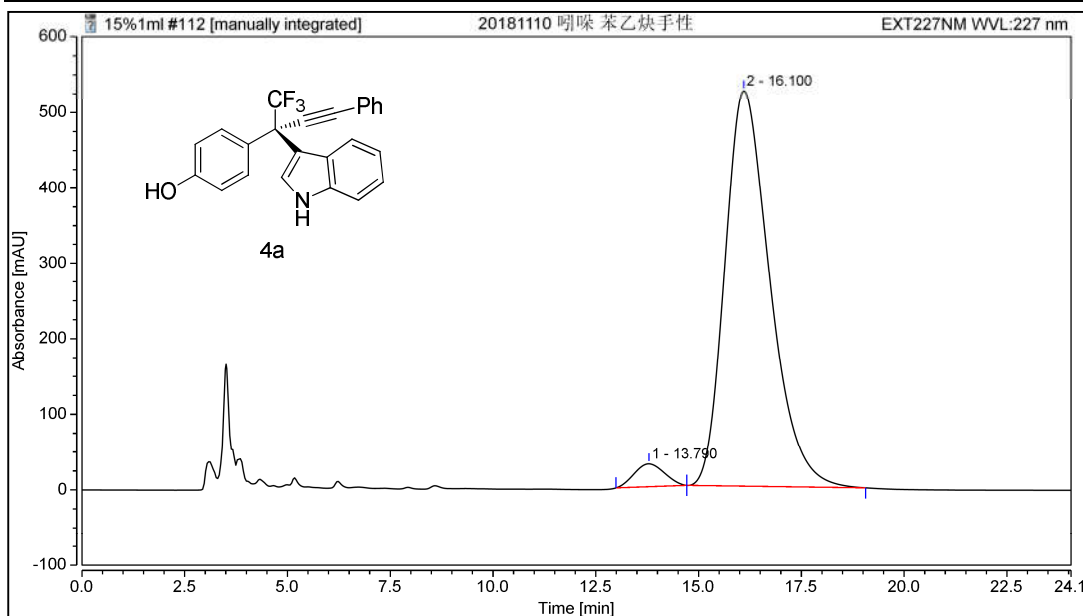

### Integration Results

| No.           | Peak Name | Retention Time<br>min | Area<br>mAU*min | Relative Area<br>% | Amount<br>n.a. |
|---------------|-----------|-----------------------|-----------------|--------------------|----------------|
| 1             |           | 13.790                | 25.534          | 3.71               | n.a.           |
| 2             |           | 16.100                | 662.918         | 96.29              | n.a.           |
| <b>Total:</b> |           |                       | <b>688.452</b>  | <b>100.00</b>      |                |



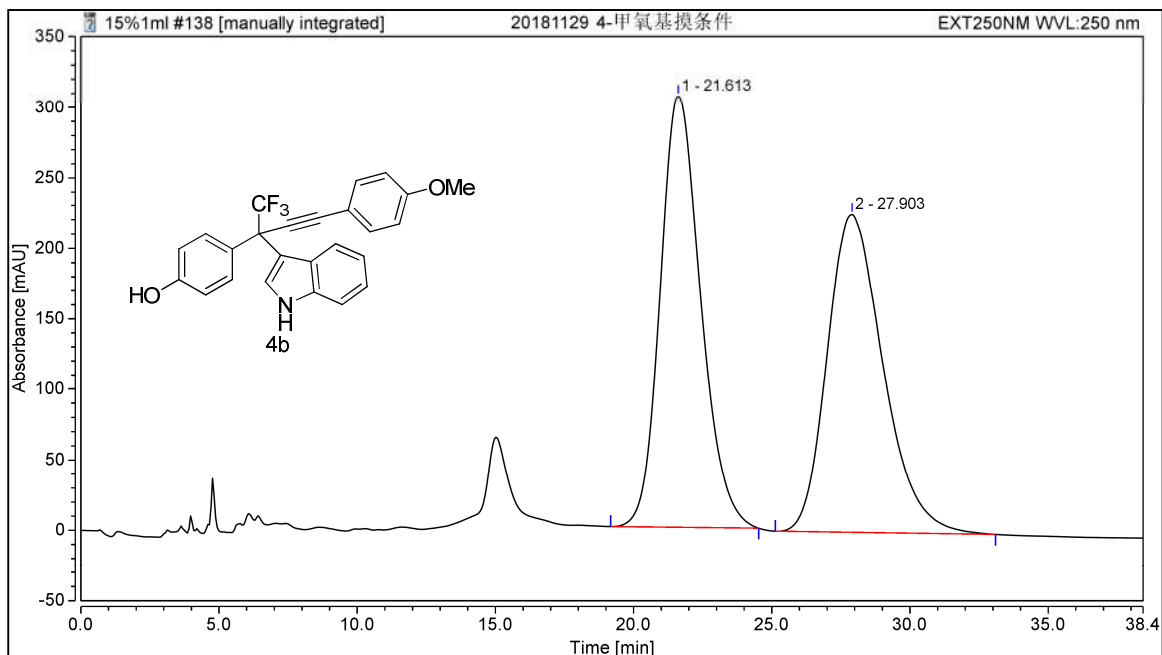

### Integration Results

| No.           | Peak Name | Retention Time<br>min | Area<br>mAU*min | Relative Area<br>% | Amount<br>n.a. |
|---------------|-----------|-----------------------|-----------------|--------------------|----------------|
| 1             |           | 21.613                | 519.701         | 49.63              | n.a.           |
| 2             |           | 27.903                | 527.413         | 50.37              | n.a.           |
| <b>Total:</b> |           |                       | <b>1047.114</b> | <b>100.00</b>      |                |

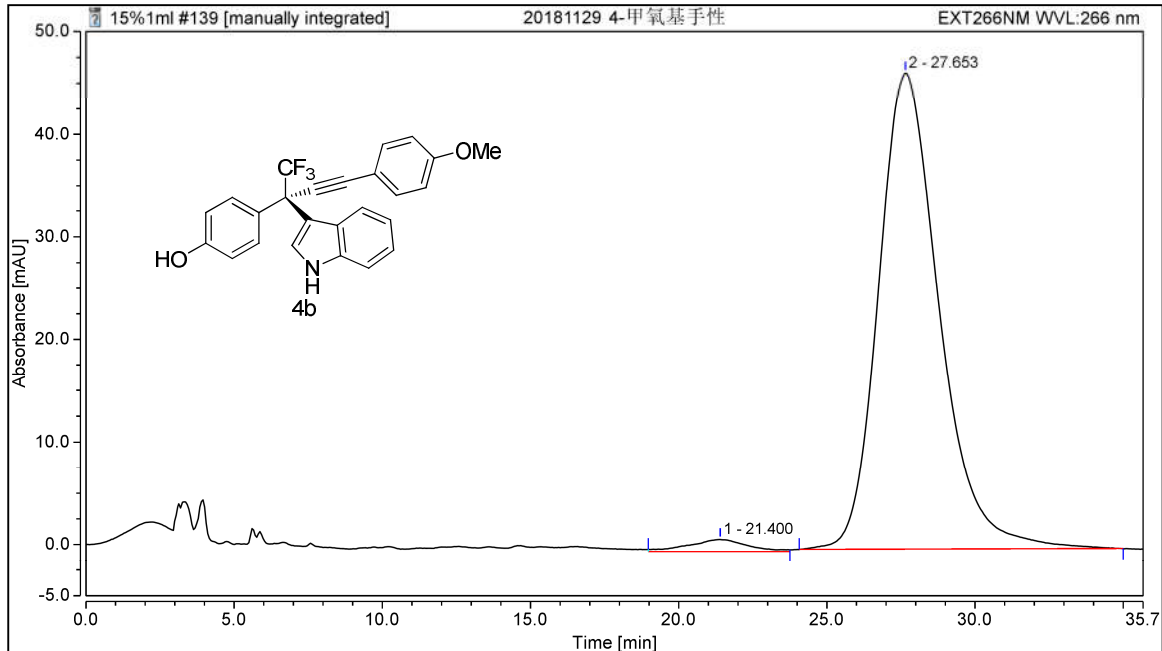

### Integration Results

| No.           | Peak Name | Retention Time<br>min | Area<br>mAU*min | Relative Area<br>% | Amount<br>n.a. |
|---------------|-----------|-----------------------|-----------------|--------------------|----------------|
| 1             |           | 21.400                | 2.749           | 2.44               | n.a.           |
| 2             |           | 27.653                | 109.940         | 97.56              | n.a.           |
| <b>Total:</b> |           |                       | <b>112.689</b>  | <b>100.00</b>      |                |

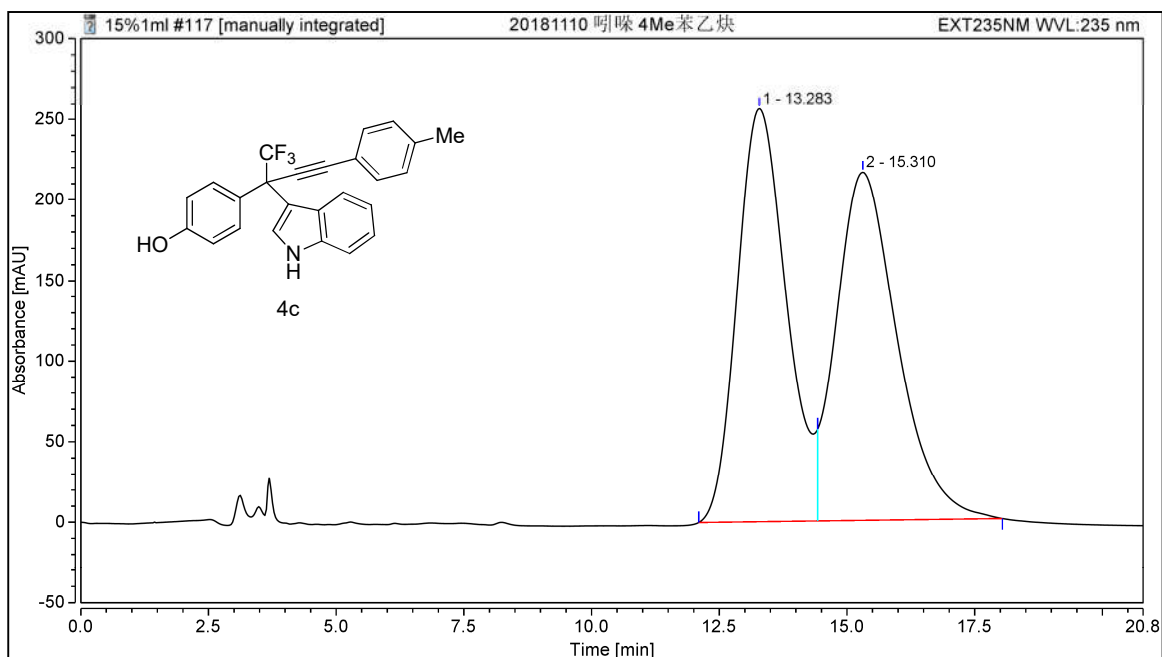

### Integration Results

| No.           | Peak Name | Retention Time<br>min | Area<br>mAU*min | Relative Area<br>% | Amount<br>n.a. |
|---------------|-----------|-----------------------|-----------------|--------------------|----------------|
| 1             |           | 13.283                | 286.196         | 48.99              | n.a.           |
| 2             |           | 15.310                | 298.009         | 51.01              | n.a.           |
| <b>Total:</b> |           |                       | <b>584.204</b>  | <b>100.00</b>      |                |

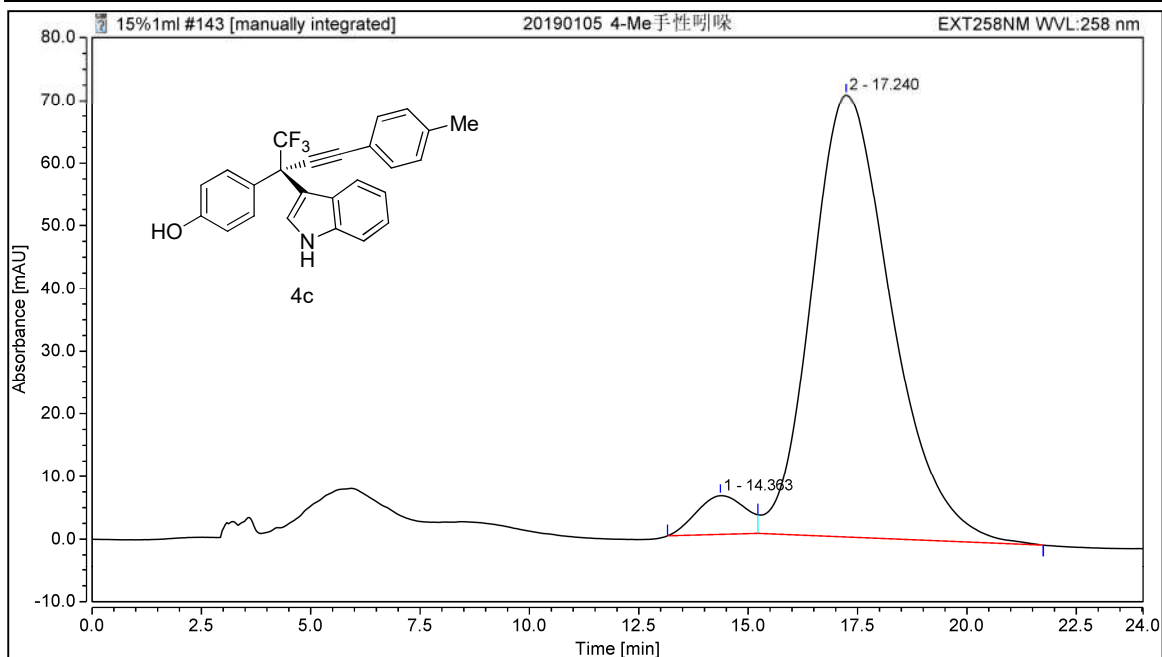

### Integration Results

| No.           | Peak Name | Retention Time<br>min | Area<br>mAU*min | Relative Area<br>% | Amount<br>n.a. |
|---------------|-----------|-----------------------|-----------------|--------------------|----------------|
| 1             |           | 14.363                | 7.928           | 5.04               | n.a.           |
| 2             |           | 17.240                | 149.396         | 94.96              | n.a.           |
| <b>Total:</b> |           |                       | <b>157.324</b>  | <b>100.00</b>      |                |

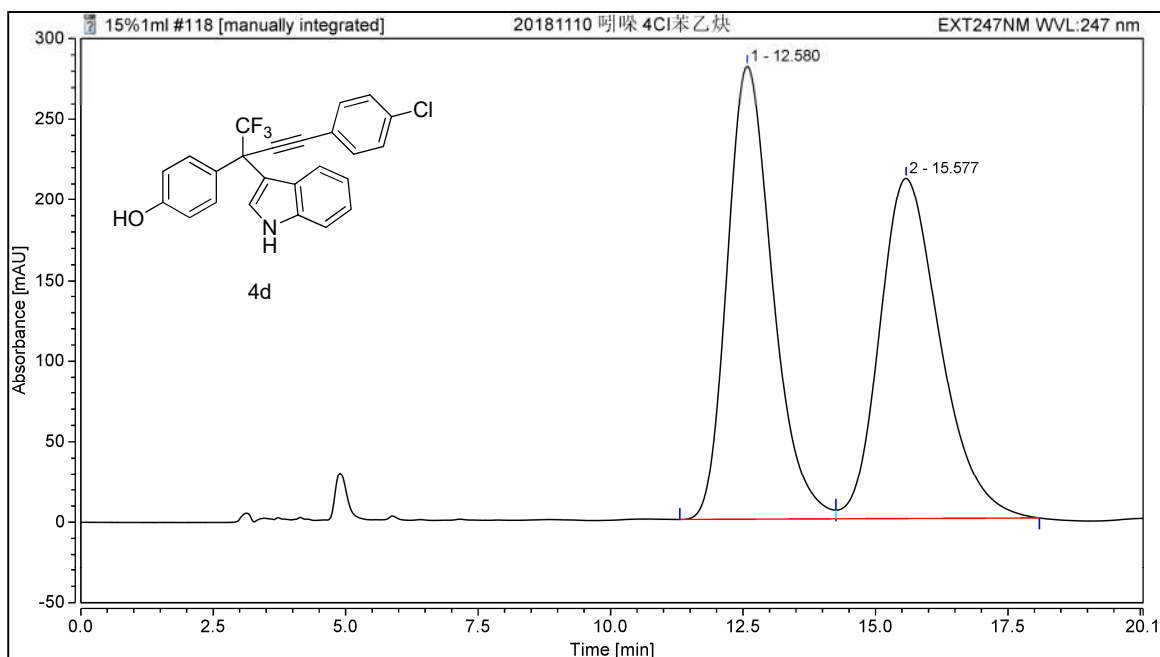

### Integration Results

| No.           | Peak Name | Retention Time<br>min | Area<br>mAU*min | Relative Area<br>% | Amount<br>n.a. |
|---------------|-----------|-----------------------|-----------------|--------------------|----------------|
| 1             |           | 12.580                | 278.634         | 49.94              | n.a.           |
| 2             |           | 15.577                | 279.358         | 50.06              | n.a.           |
| <b>Total:</b> |           |                       | <b>557.993</b>  | <b>100.00</b>      |                |

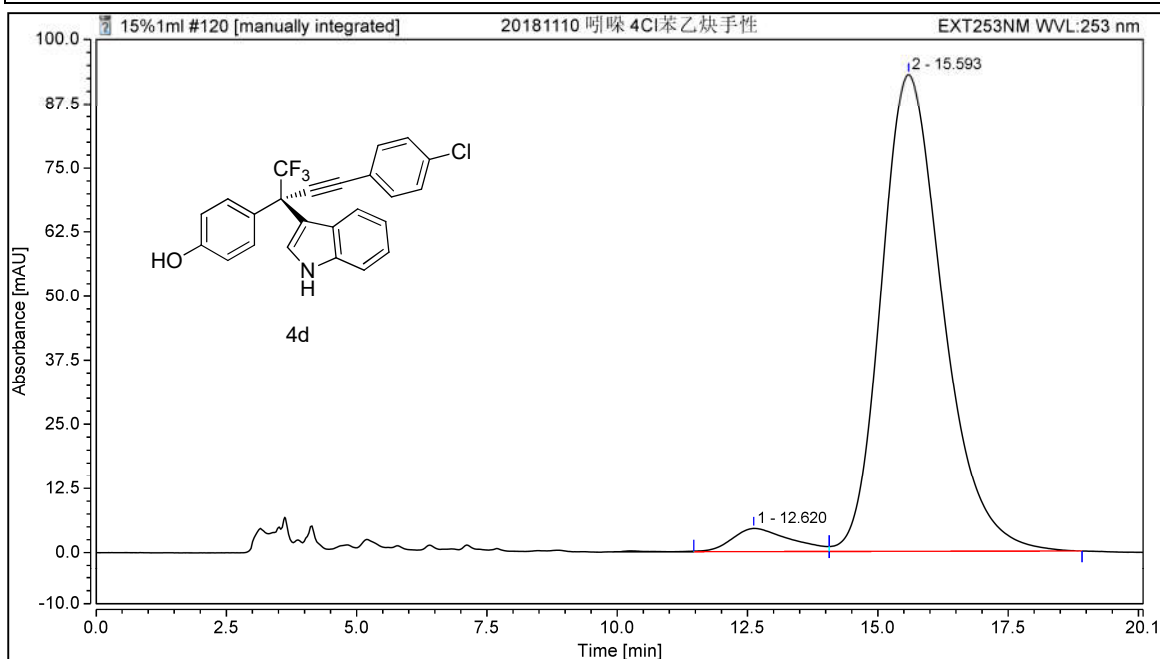

### Integration Results

| No.           | Peak Name | Retention Time<br>min | Area<br>mAU*min | Relative Area<br>% | Amount<br>n.a. |
|---------------|-----------|-----------------------|-----------------|--------------------|----------------|
| 1             |           | 12.620                | 5.829           | 4.39               | n.a.           |
| 2             |           | 15.593                | 127.027         | 95.61              | n.a.           |
| <b>Total:</b> |           |                       | <b>132.856</b>  | <b>100.00</b>      |                |

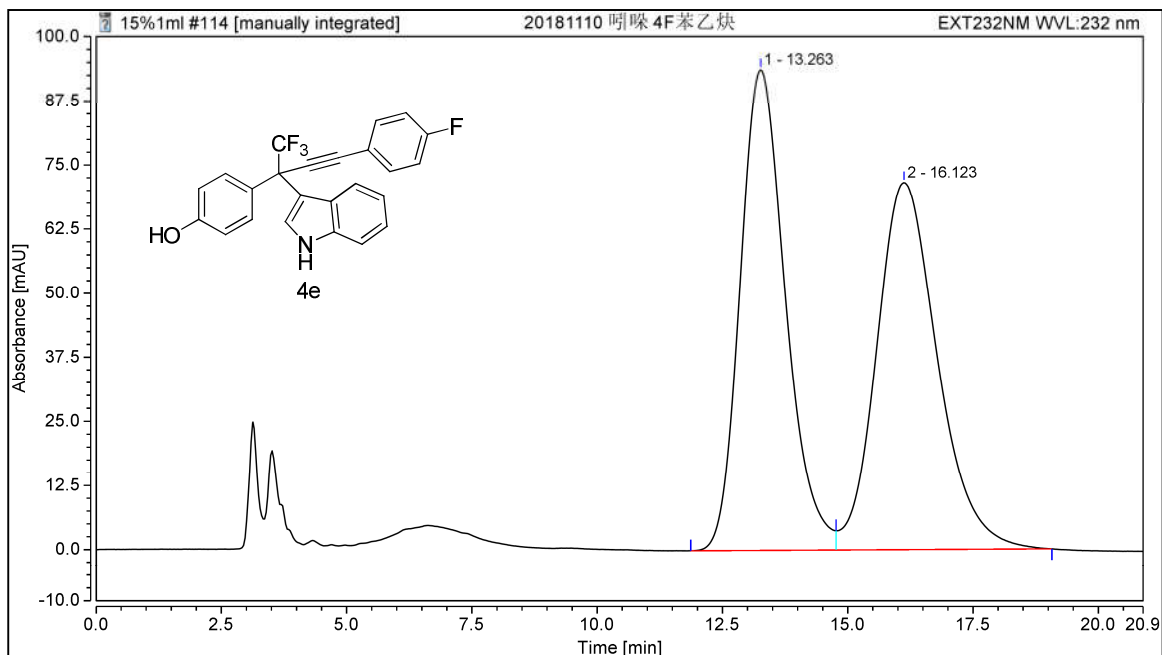

### Integration Results

| No.           | Peak Name | Retention Time<br>min | Area<br>mAU*min | Relative Area<br>% | Amount<br>n.a. |
|---------------|-----------|-----------------------|-----------------|--------------------|----------------|
| 1             |           | 13.263                | 98.168          | 49.43              | n.a.           |
| 2             |           | 16.123                | 100.422         | 50.57              | n.a.           |
| <b>Total:</b> |           |                       | <b>198.589</b>  | <b>100.00</b>      |                |

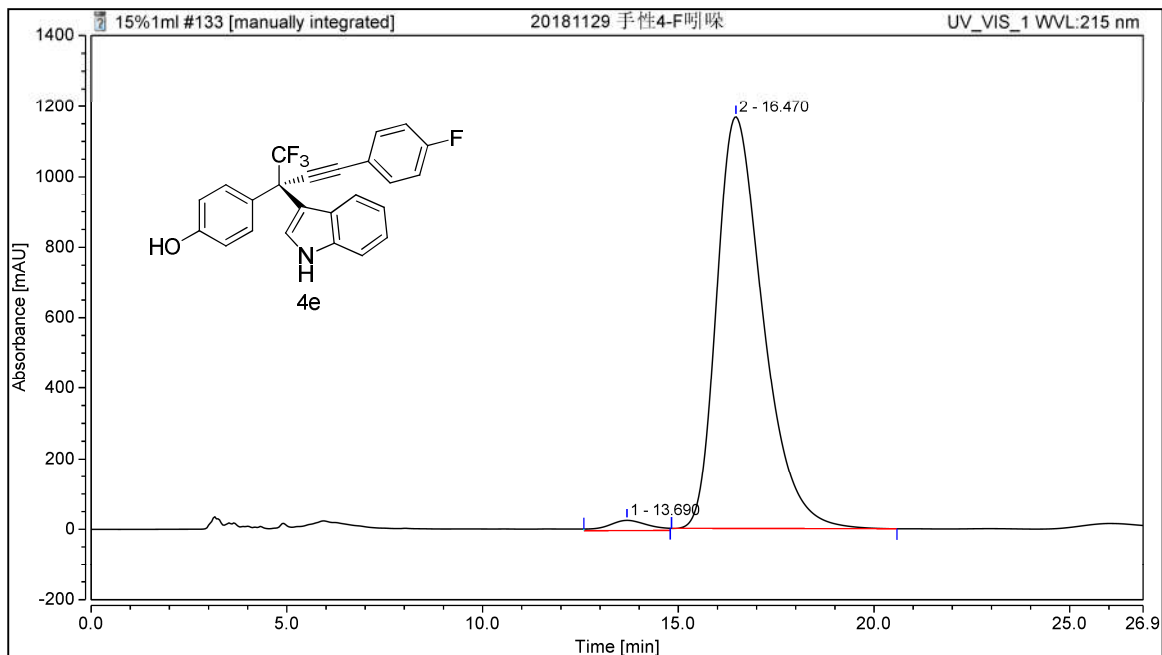

### Integration Results

| No.           | Peak Name | Retention Time<br>min | Area<br>mAU*min | Relative Area<br>% | Amount<br>n.a. |
|---------------|-----------|-----------------------|-----------------|--------------------|----------------|
| 1             |           | 13.690                | 34.242          | 2.09               | n.a.           |
| 2             |           | 16.470                | 1604.920        | 97.91              | n.a.           |
| <b>Total:</b> |           |                       | <b>1639.162</b> | <b>100.00</b>      |                |

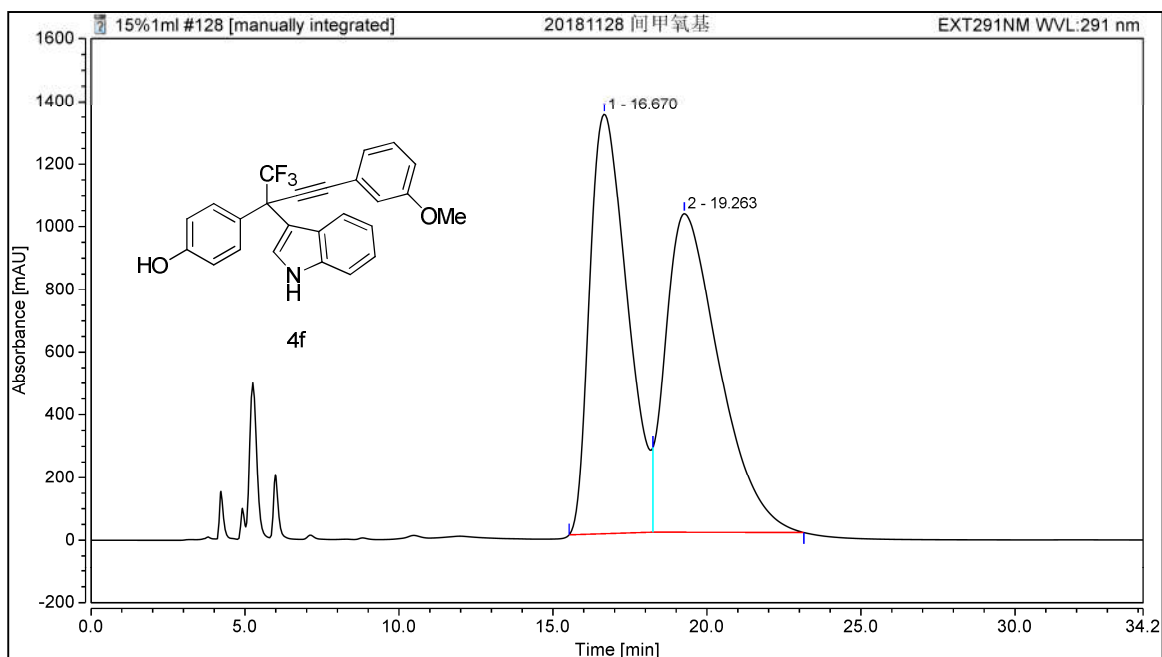

### Integration Results

| No.           | Peak Name | Retention Time<br>min | Area<br>mAU*min | Relative Area<br>% | Amount<br>n.a. |
|---------------|-----------|-----------------------|-----------------|--------------------|----------------|
| 1             |           | 16.670                | 1901.324        | 48.13              | n.a.           |
| 2             |           | 19.263                | 2049.436        | 51.87              | n.a.           |
| <b>Total:</b> |           |                       | <b>3950.760</b> | <b>100.00</b>      |                |

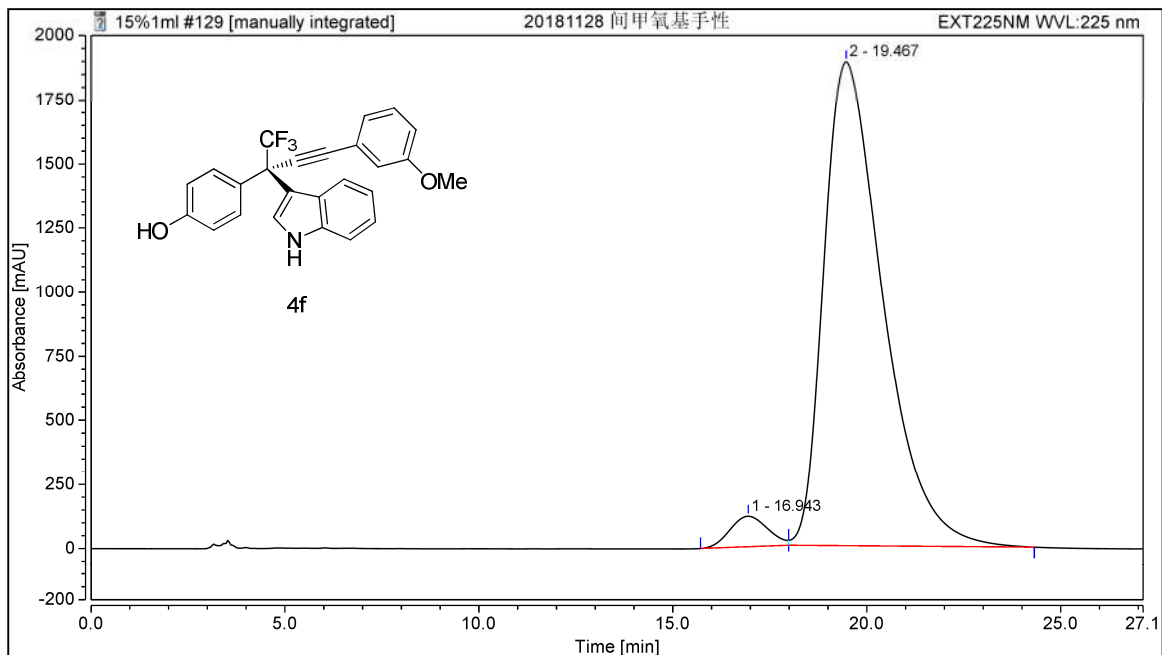

### Integration Results

| No.           | Peak Name | Retention Time<br>min | Area<br>mAU*min | Relative Area<br>% | Amount<br>n.a. |
|---------------|-----------|-----------------------|-----------------|--------------------|----------------|
| 1             |           | 16.943                | 133.471         | 3.85               | n.a.           |
| 2             |           | 19.467                | 3329.168        | 96.15              | n.a.           |
| <b>Total:</b> |           |                       | <b>3462.639</b> | <b>100.00</b>      |                |

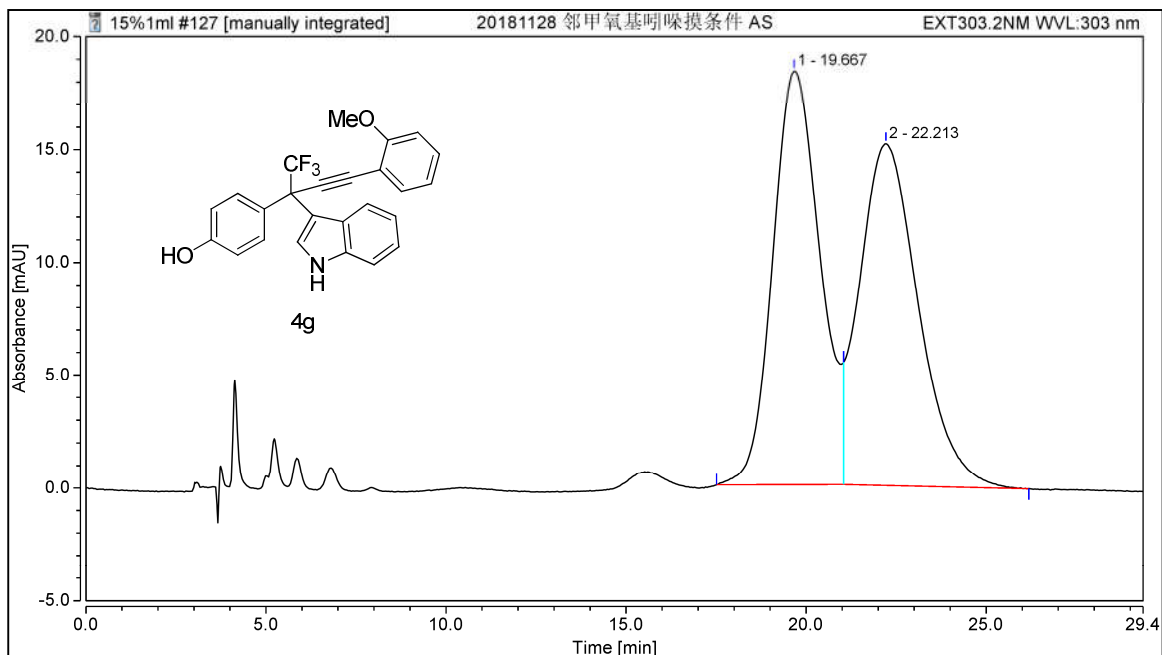

### Integration Results

| No.           | Peak Name | Retention Time<br>min | Area<br>mAU*min | Relative Area<br>% | Amount<br>n.a. |
|---------------|-----------|-----------------------|-----------------|--------------------|----------------|
| 1             |           | 19.667                | 27.908          | 49.39              | n.a.           |
| 2             |           | 22.213                | 28.595          | 50.61              | n.a.           |
| <b>Total:</b> |           |                       | <b>56.503</b>   | <b>100.00</b>      |                |

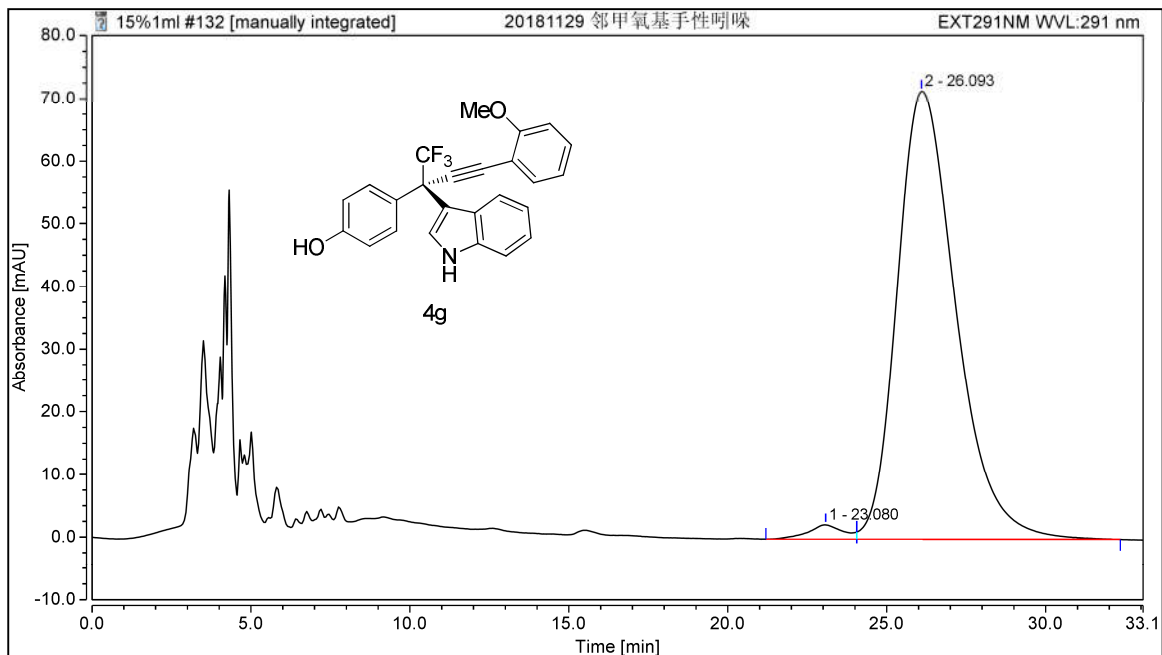

### Integration Results

| No.           | Peak Name | Retention Time<br>min | Area<br>mAU*min | Relative Area<br>% | Amount<br>n.a. |
|---------------|-----------|-----------------------|-----------------|--------------------|----------------|
| 1             |           | 23.080                | 2.958           | 1.90               | n.a.           |
| 2             |           | 26.093                | 153.050         | 98.10              | n.a.           |
| <b>Total:</b> |           |                       | <b>156.008</b>  | <b>100.00</b>      |                |

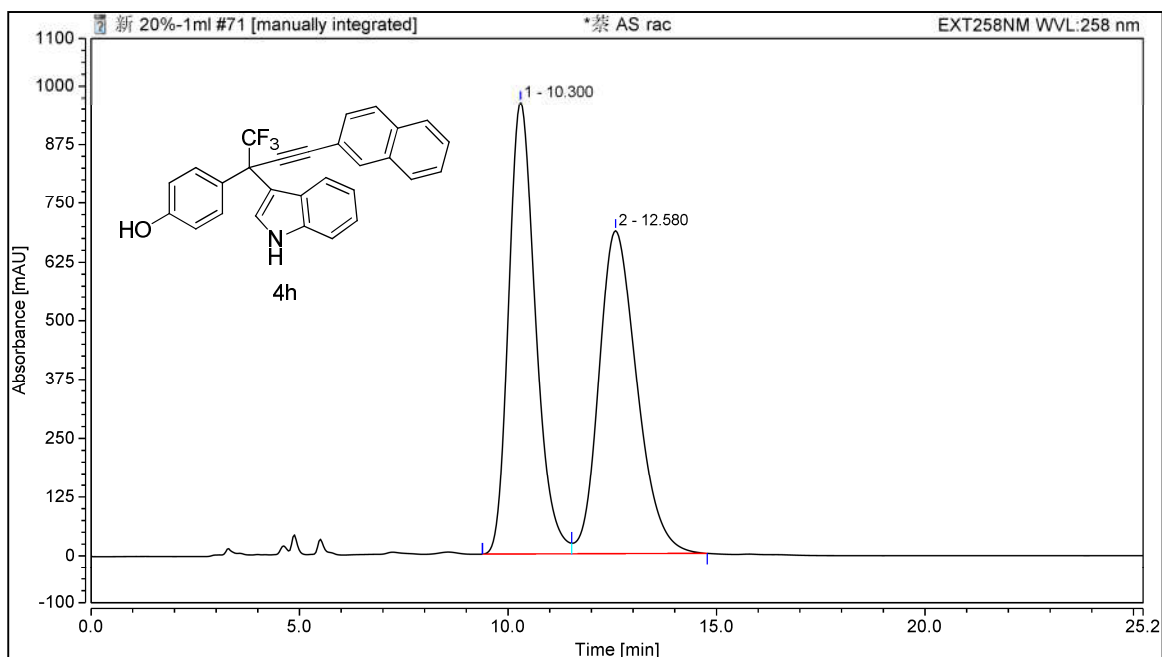

### Integration Results

| No.           | Peak Name | Retention Time<br>min | Area<br>mAU*min | Relative Area<br>% | Amount<br>n.a. |
|---------------|-----------|-----------------------|-----------------|--------------------|----------------|
| 1             |           | 10.300                | 717.035         | 49.76              | n.a.           |
| 2             |           | 12.580                | 723.885         | 50.24              | n.a.           |
| <b>Total:</b> |           |                       | <b>1440.920</b> | <b>100.00</b>      |                |

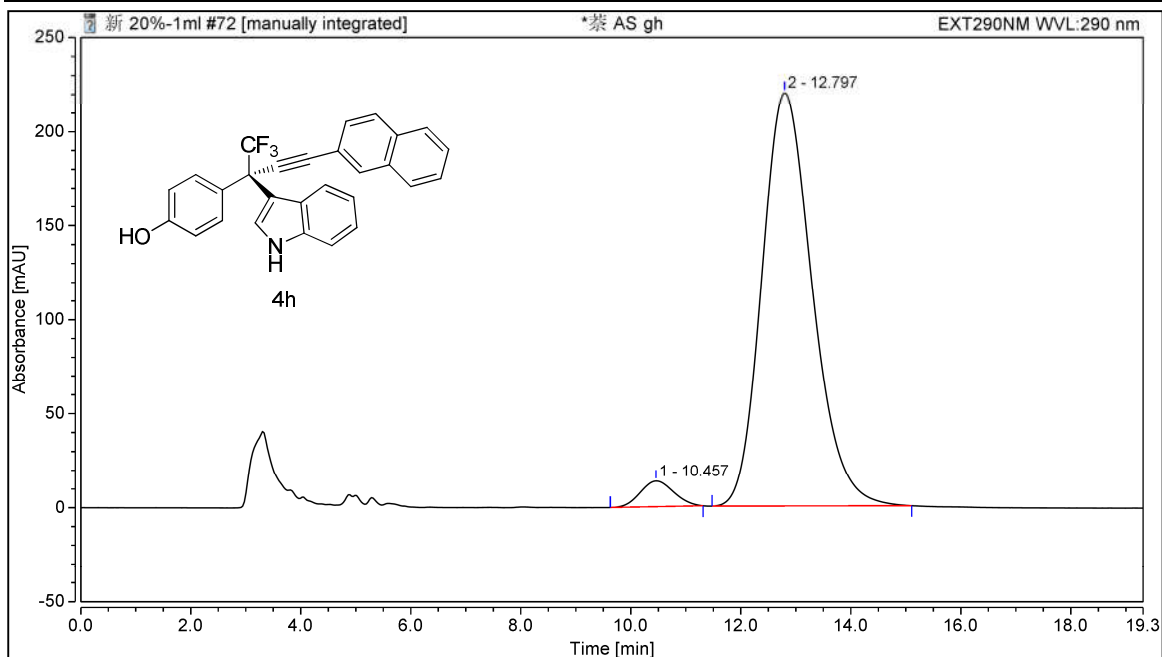

### Integration Results

| No.           | Peak Name | Retention Time<br>min | Area<br>mAU*min | Relative Area<br>% | Amount<br>n.a. |
|---------------|-----------|-----------------------|-----------------|--------------------|----------------|
| 1             |           | 10.457                | 9.626           | 3.97               | n.a.           |
| 2             |           | 12.797                | 233.079         | 96.03              | n.a.           |
| <b>Total:</b> |           |                       | <b>242.705</b>  | <b>100.00</b>      |                |

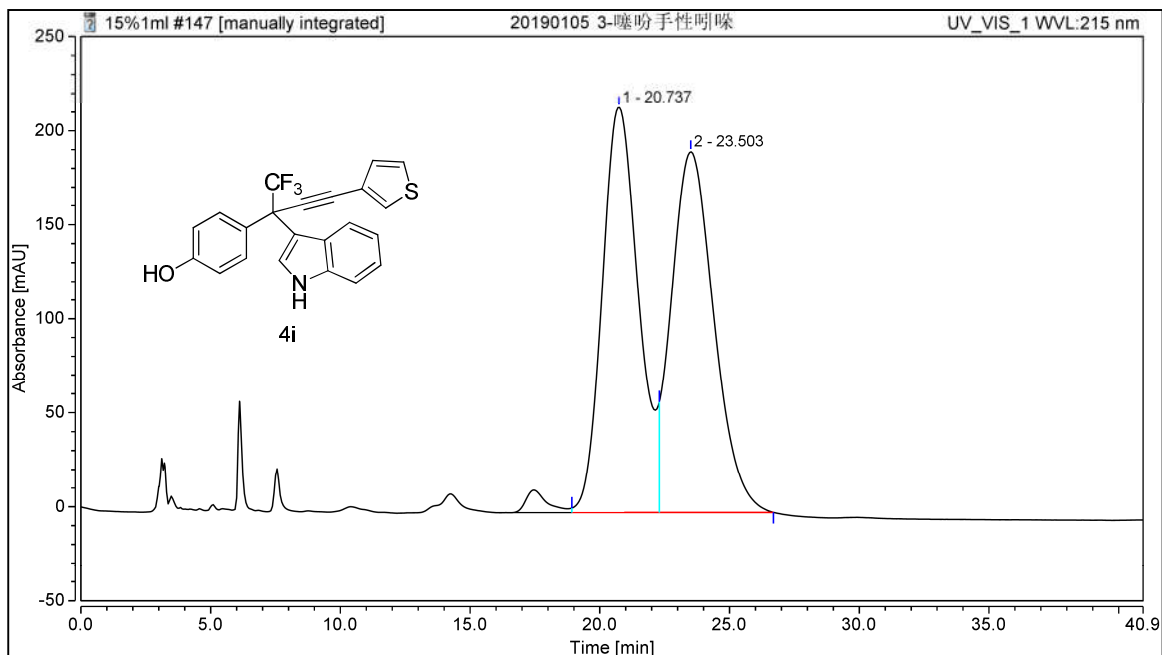

### Integration Results

| No.           | Peak Name | Retention Time<br>min | Area<br>mAU*min | Relative Area<br>% | Amount<br>n.a. |
|---------------|-----------|-----------------------|-----------------|--------------------|----------------|
| 1             |           | 20.737                | 348.887         | 49.03              | n.a.           |
| 2             |           | 23.503                | 362.676         | 50.97              | n.a.           |
| <b>Total:</b> |           |                       | <b>711.563</b>  | <b>100.00</b>      |                |

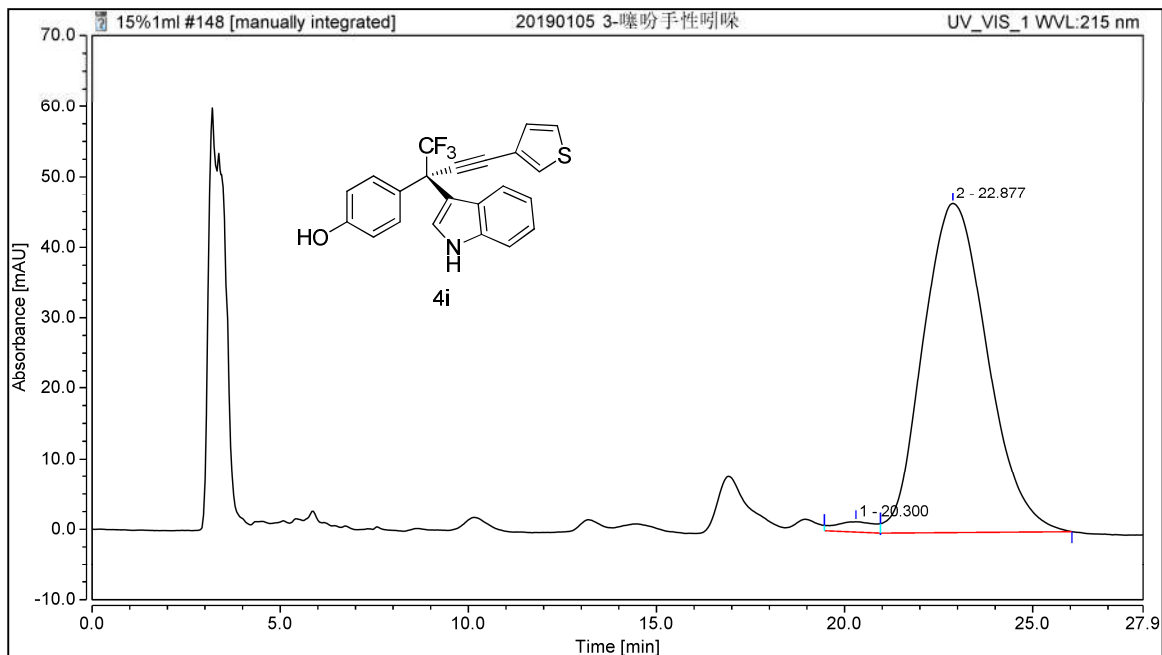

### Integration Results

| No.           | Peak Name | Retention Time<br>min | Area<br>mAU*min | Relative Area<br>% | Amount<br>n.a. |
|---------------|-----------|-----------------------|-----------------|--------------------|----------------|
| 1             |           | 20.300                | 1.791           | 1.91               | n.a.           |
| 2             |           | 22.877                | 92.179          | 98.09              | n.a.           |
| <b>Total:</b> |           |                       | <b>93.969</b>   | <b>100.00</b>      |                |



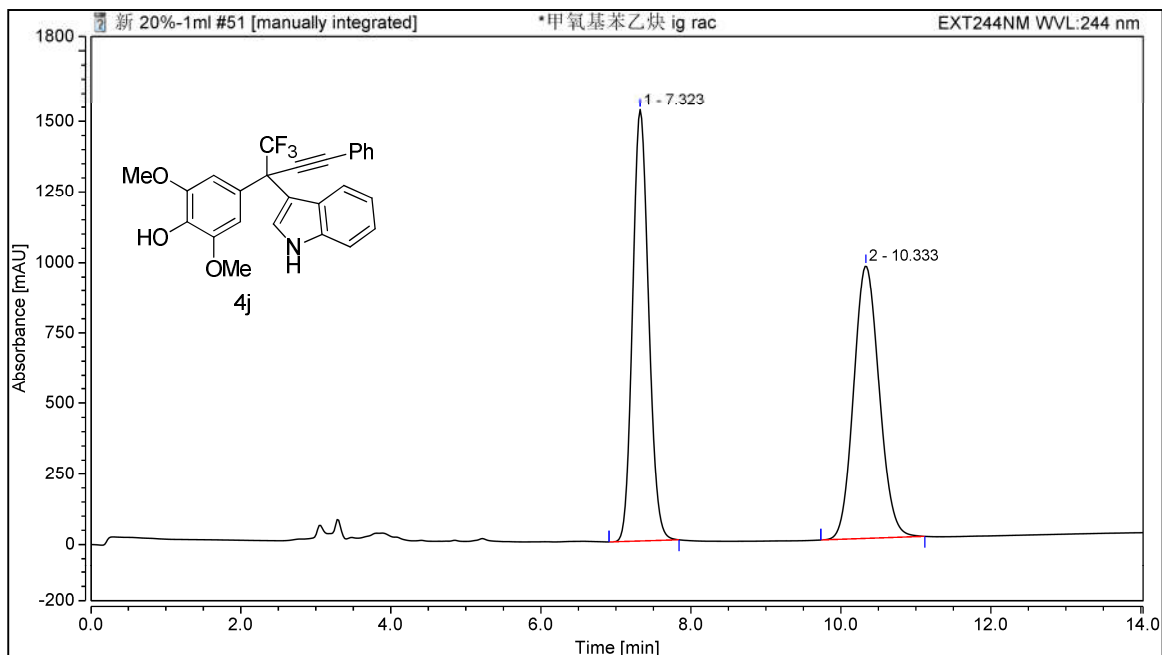

### Integration Results

| No.           | Peak Name | Retention Time<br>min | Area<br>mAU*min | Relative Area<br>% | Amount<br>n.a. |
|---------------|-----------|-----------------------|-----------------|--------------------|----------------|
| 1             |           | 7.323                 | 377.472         | 49.78              | n.a.           |
| 2             |           | 10.333                | 380.820         | 50.22              | n.a.           |
| <b>Total:</b> |           |                       | <b>758.292</b>  | <b>100.00</b>      |                |

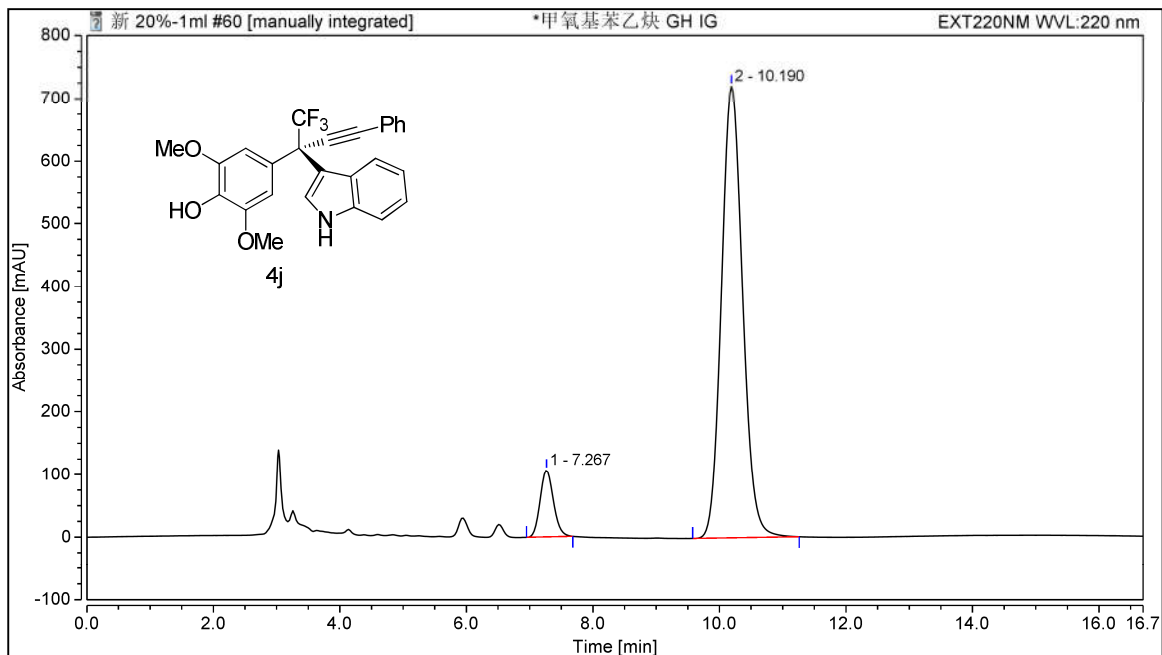

### Integration Results

| No.           | Peak Name | Retention Time<br>min | Area<br>mAU*min | Relative Area<br>% | Amount<br>n.a. |
|---------------|-----------|-----------------------|-----------------|--------------------|----------------|
| 1             |           | 7.267                 | 25.886          | 8.48               | n.a.           |
| 2             |           | 10.190                | 279.245         | 91.52              | n.a.           |
| <b>Total:</b> |           |                       | <b>305.131</b>  | <b>100.00</b>      |                |

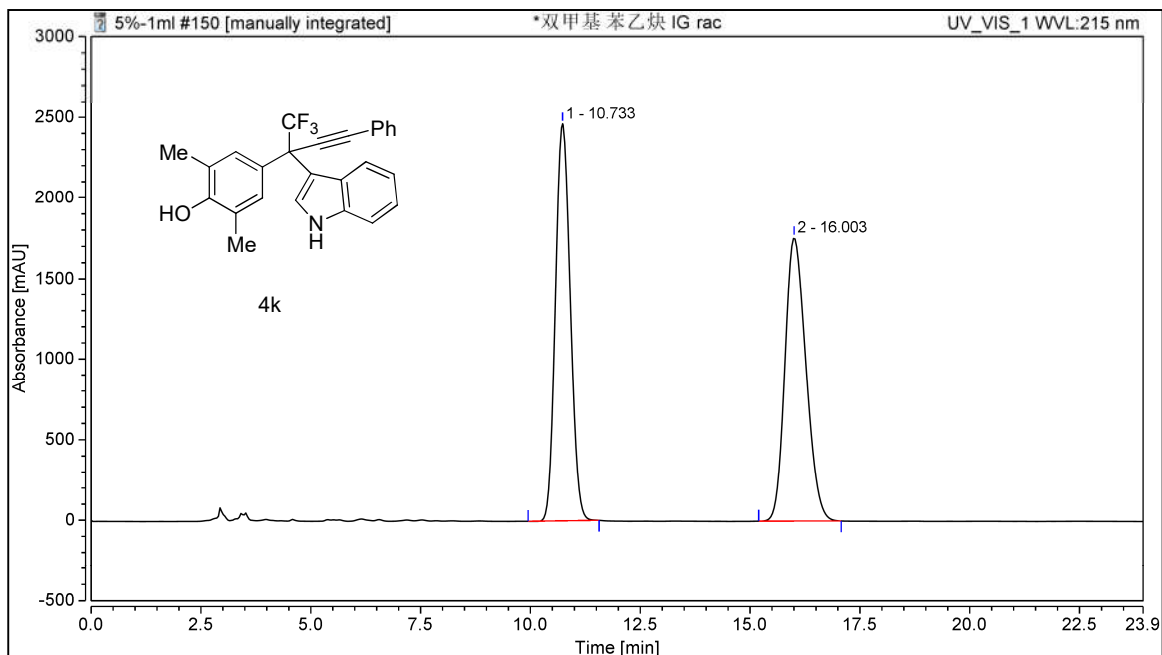

### Integration Results

| No.           | Peak Name | Retention Time<br>min | Area<br>mAU*min | Relative Area<br>% | Amount<br>n.a. |
|---------------|-----------|-----------------------|-----------------|--------------------|----------------|
| 1             |           | 10.733                | 964.219         | 49.75              | n.a.           |
| 2             |           | 16.003                | 973.902         | 50.25              | n.a.           |
| <b>Total:</b> |           |                       | <b>1938.121</b> | <b>100.00</b>      |                |

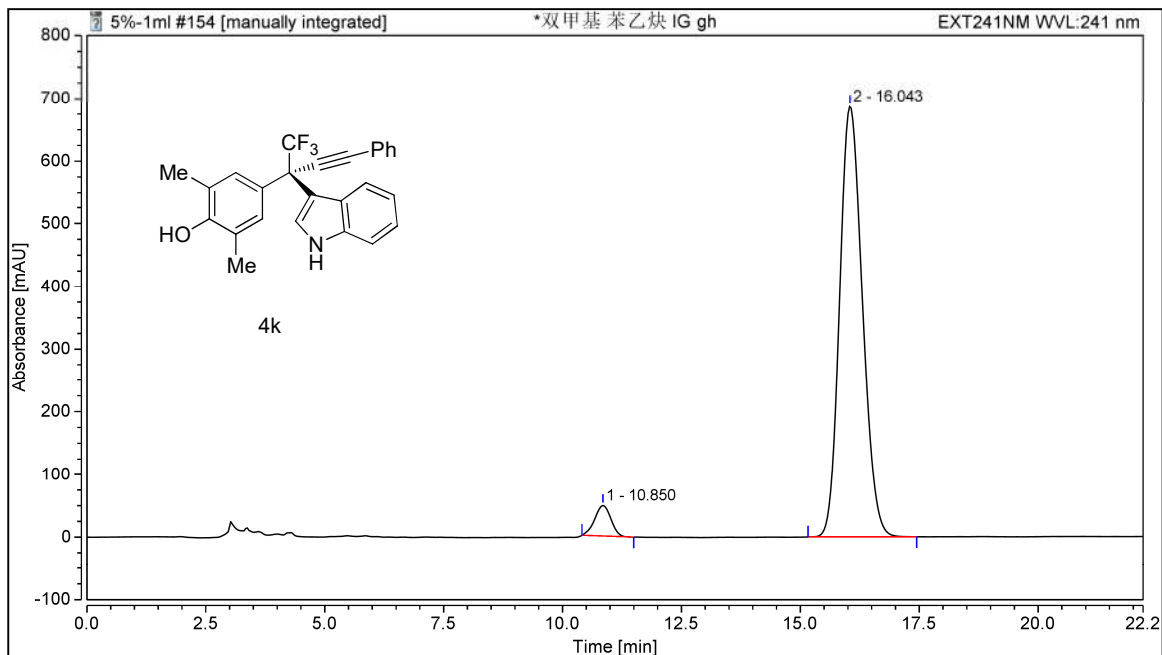

### Integration Results

| No.           | Peak Name | Retention Time<br>min | Area<br>mAU*min | Relative Area<br>% | Amount<br>n.a. |
|---------------|-----------|-----------------------|-----------------|--------------------|----------------|
| 1             |           | 10.850                | 19.031          | 4.76               | n.a.           |
| 2             |           | 16.043                | 380.653         | 95.24              | n.a.           |
| <b>Total:</b> |           |                       | <b>399.684</b>  | <b>100.00</b>      |                |

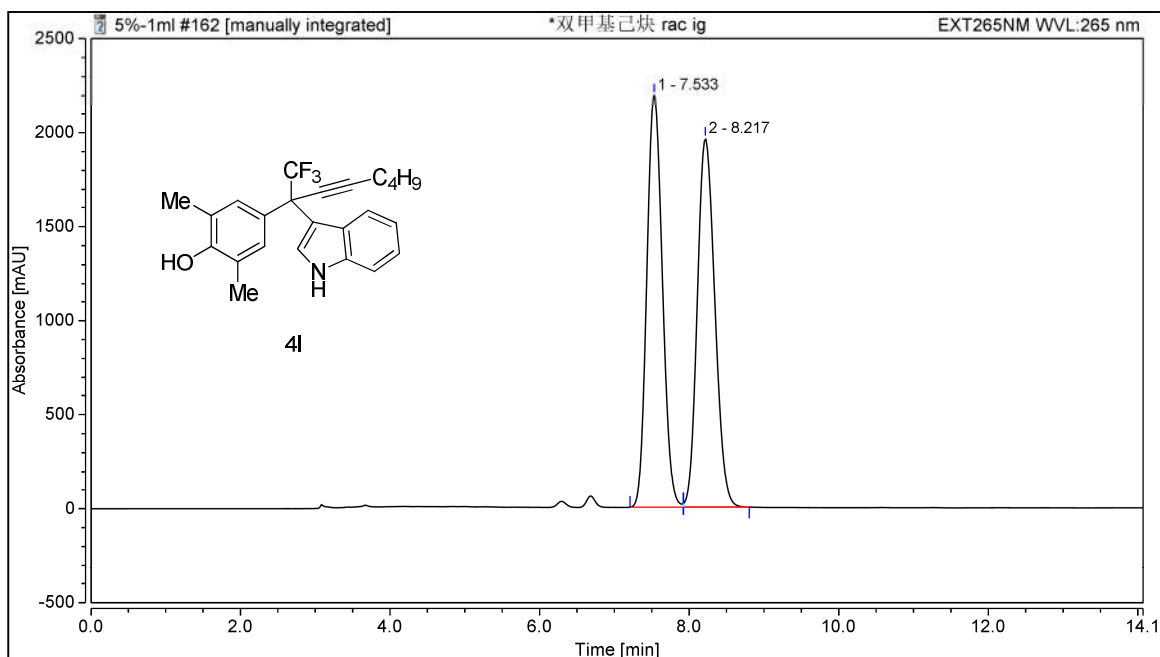

### Integration Results

| No.           | Peak Name | Retention Time<br>min | Area<br>mAU*min | Relative Area<br>% | Amount<br>n.a. |
|---------------|-----------|-----------------------|-----------------|--------------------|----------------|
| 1             |           | 7.533                 | 529.244         | 49.84              | n.a.           |
| 2             |           | 8.217                 | 532.691         | 50.16              | n.a.           |
| <b>Total:</b> |           |                       | <b>1061.935</b> | <b>100.00</b>      |                |

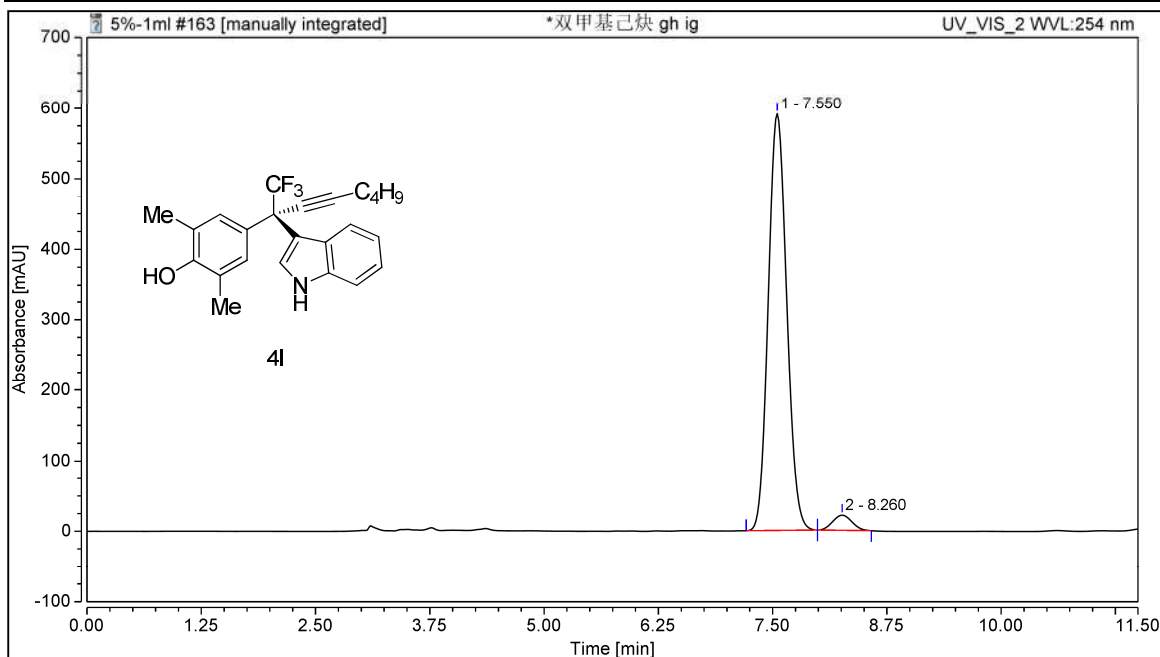

### Integration Results

| No.           | Peak Name | Retention Time<br>min | Area<br>mAU*min | Relative Area<br>% | Amount<br>n.a. |
|---------------|-----------|-----------------------|-----------------|--------------------|----------------|
| 1             |           | 7.550                 | 138.246         | 96.35              | n.a.           |
| 2             |           | 8.260                 | 5.232           | 3.65               | n.a.           |
| <b>Total:</b> |           |                       | <b>143.478</b>  | <b>100.00</b>      |                |

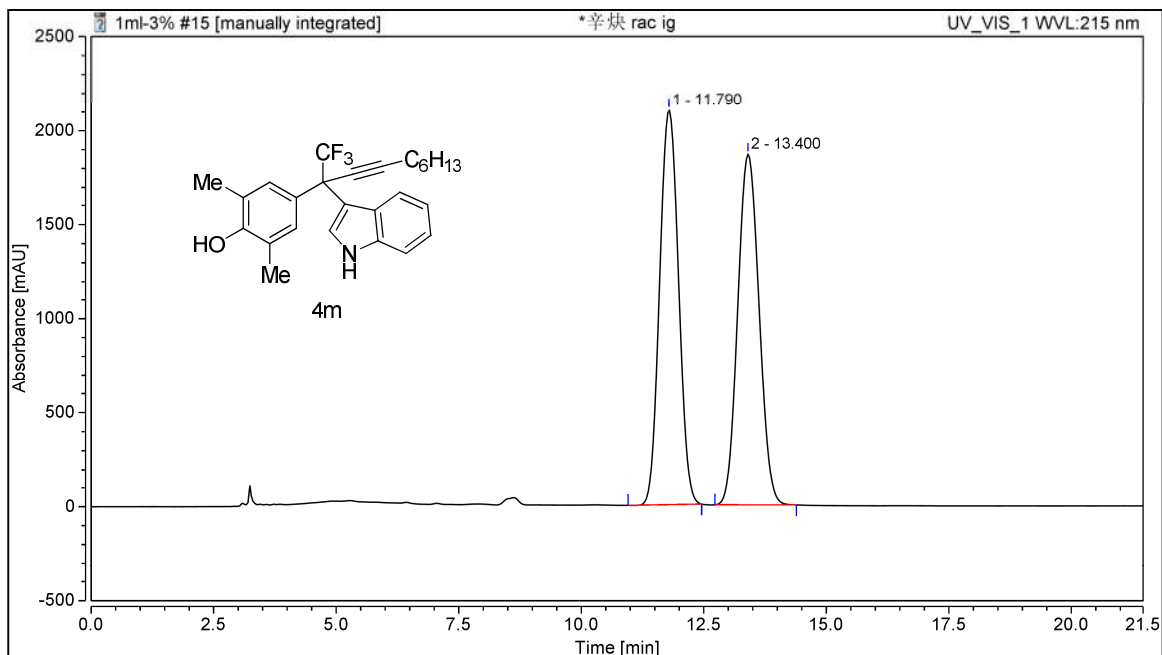

### Integration Results

| No.           | Peak Name | Retention Time<br>min | Area<br>mAU*min | Relative Area<br>% | Amount<br>n.a. |
|---------------|-----------|-----------------------|-----------------|--------------------|----------------|
| 1             |           | 11.790                | 936.221         | 49.93              | n.a.           |
| 2             |           | 13.400                | 938.747         | 50.07              | n.a.           |
| <b>Total:</b> |           |                       | <b>1874.968</b> | <b>100.00</b>      |                |

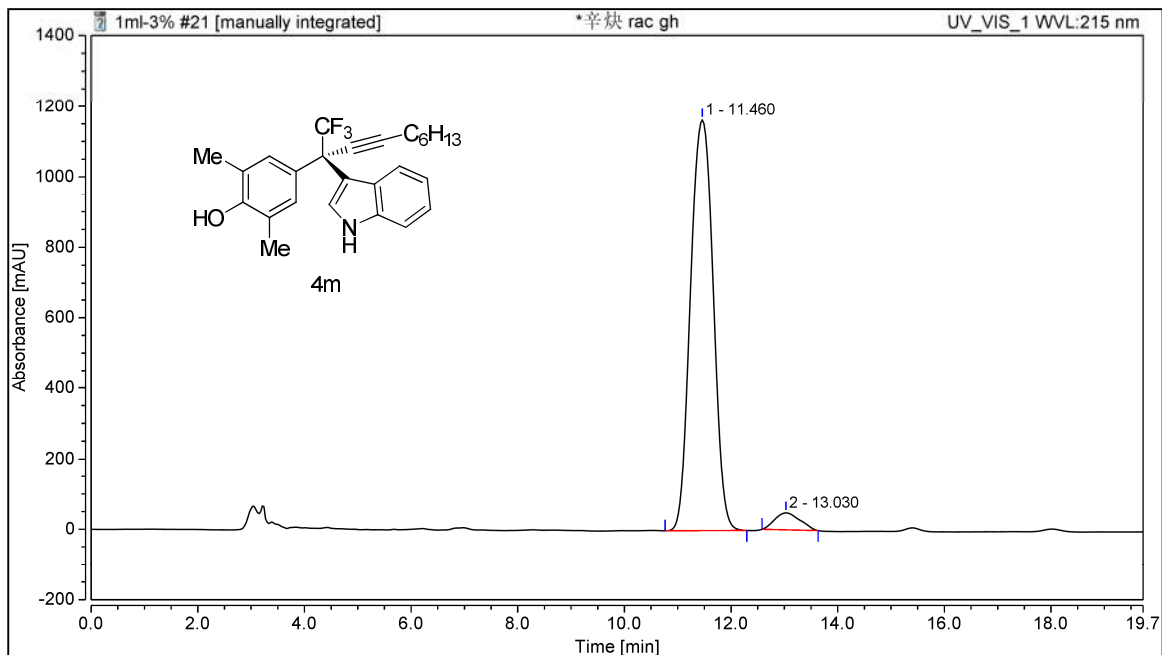

### Integration Results

| No.           | Peak Name | Retention Time<br>min | Area<br>mAU*min | Relative Area<br>% | Amount<br>n.a. |
|---------------|-----------|-----------------------|-----------------|--------------------|----------------|
| 1             |           | 11.460                | 574.595         | 95.62              | n.a.           |
| 2             |           | 13.030                | 26.346          | 4.38               | n.a.           |
| <b>Total:</b> |           |                       | <b>600.941</b>  | <b>100.00</b>      |                |

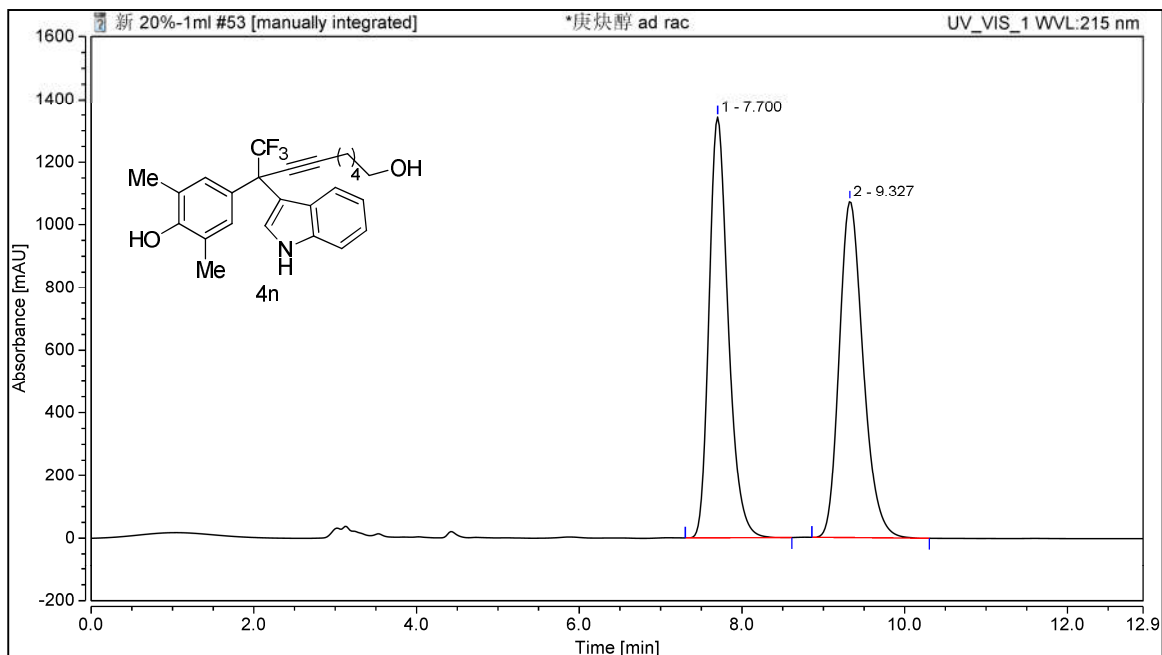

### Integration Results

| No.           | Peak Name | Retention Time<br>min | Area<br>mAU*min | Relative Area<br>% | Amount<br>n.a. |
|---------------|-----------|-----------------------|-----------------|--------------------|----------------|
| 1             |           | 7.700                 | 365.330         | 50.02              | n.a.           |
| 2             |           | 9.327                 | 365.062         | 49.98              | n.a.           |
| <b>Total:</b> |           |                       | <b>730.392</b>  | <b>100.00</b>      |                |

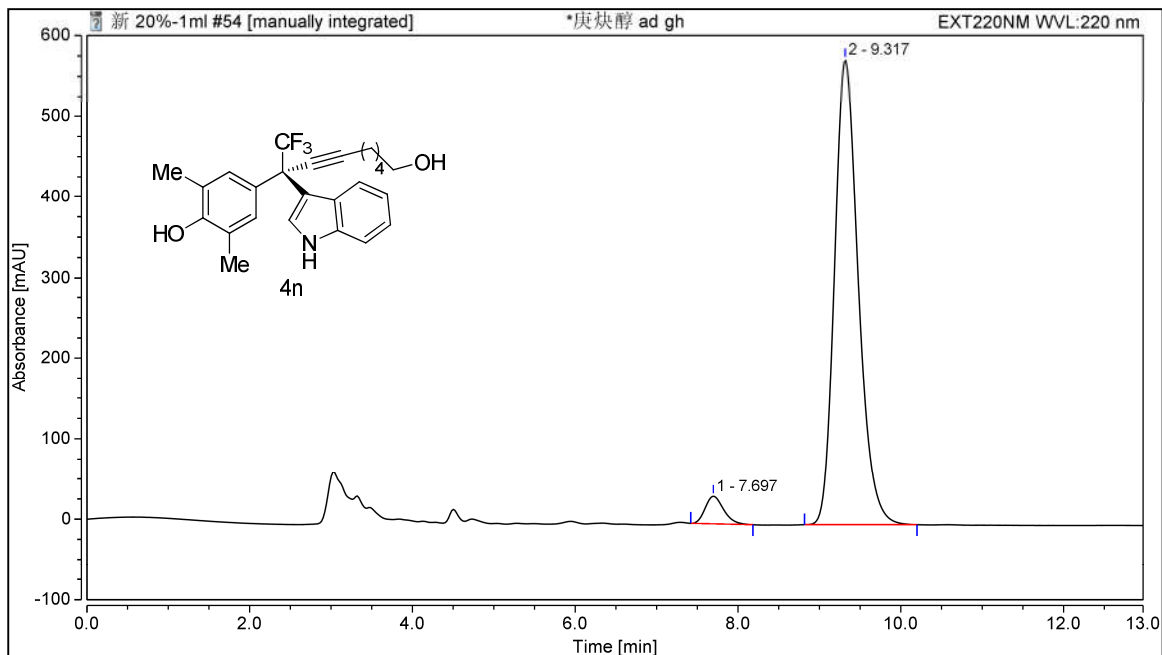

### Integration Results

| No.           | Peak Name | Retention Time<br>min | Area<br>mAU*min | Relative Area<br>% | Amount<br>n.a. |
|---------------|-----------|-----------------------|-----------------|--------------------|----------------|
| 1             |           | 7.697                 | 8.953           | 4.39               | n.a.           |
| 2             |           | 9.317                 | 195.187         | 95.61              | n.a.           |
| <b>Total:</b> |           |                       | <b>204.140</b>  | <b>100.00</b>      |                |

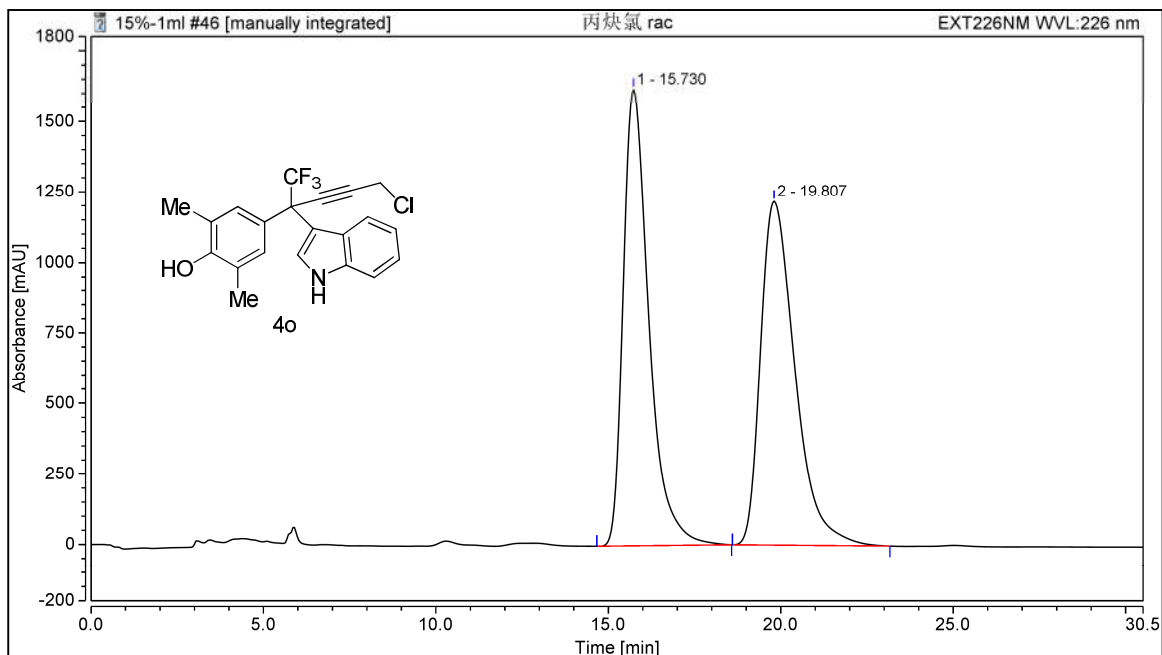

### Integration Results

| No.           | Peak Name | Retention Time<br>min | Area<br>mAU*min | Relative Area<br>% | Amount<br>n.a. |
|---------------|-----------|-----------------------|-----------------|--------------------|----------------|
| 1             |           | 15.730                | 1396.735        | 49.81              | n.a.           |
| 2             |           | 19.807                | 1407.295        | 50.19              | n.a.           |
| <b>Total:</b> |           |                       | <b>2804.030</b> | <b>100.00</b>      |                |

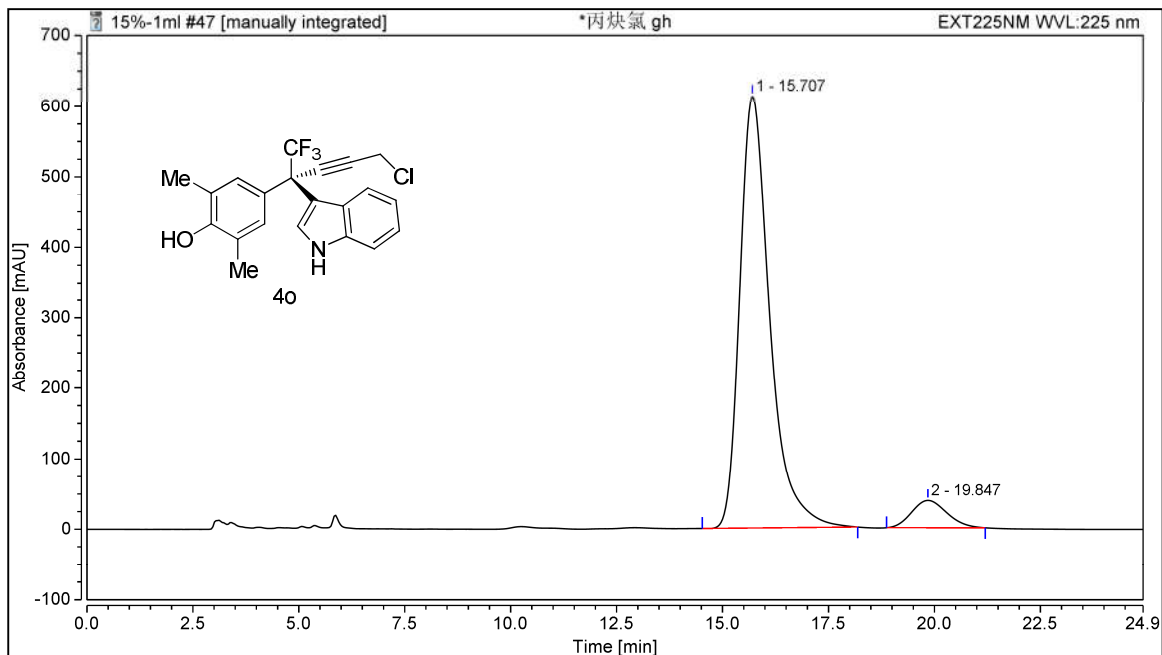

| No.           | Peak Name | Retention Time<br>min | Area<br>mAU*min | Relative Area<br>% | Amount<br>n.a. |
|---------------|-----------|-----------------------|-----------------|--------------------|----------------|
| 1             |           | 15.707                | 500.964         | 93.11              | n.a.           |
| 2             |           | 19.847                | 37.084          | 6.89               | n.a.           |
| <b>Total:</b> |           |                       | <b>538.048</b>  | <b>100.00</b>      |                |

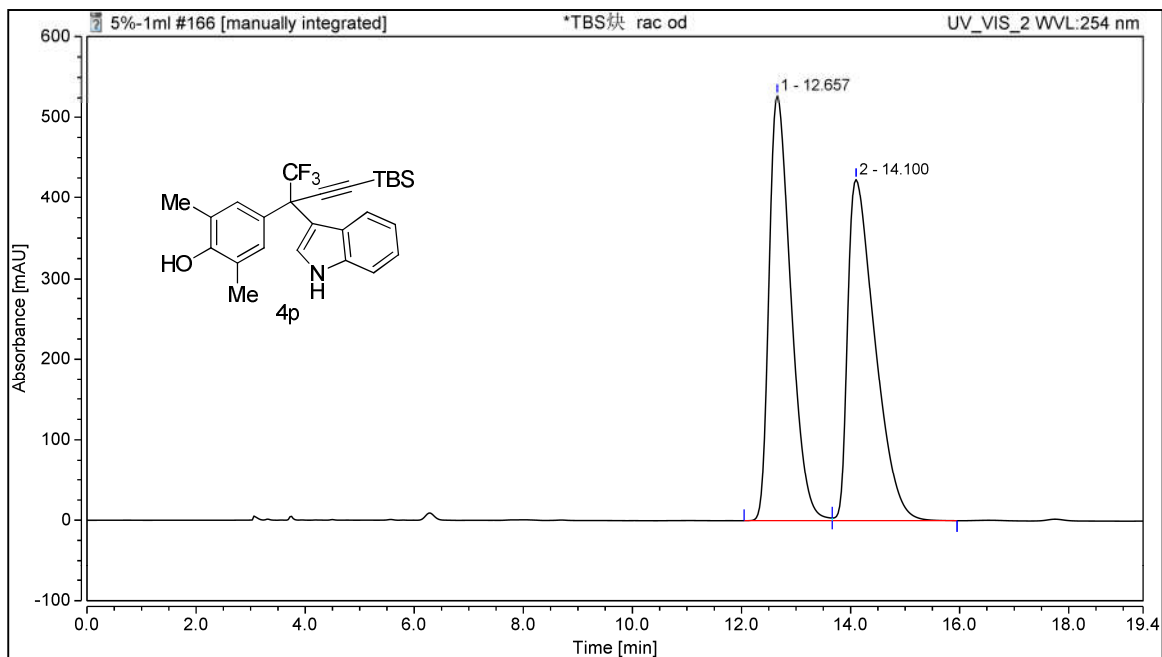

### Integration Results

| No.           | Peak Name | Retention Time<br>min | Area<br>mAU*min | Relative Area<br>% | Amount<br>n.a. |
|---------------|-----------|-----------------------|-----------------|--------------------|----------------|
| 1             |           | 12.657                | 244.239         | 49.94              | n.a.           |
| 2             |           | 14.100                | 244.830         | 50.06              | n.a.           |
| <b>Total:</b> |           |                       | <b>489.069</b>  | <b>100.00</b>      |                |

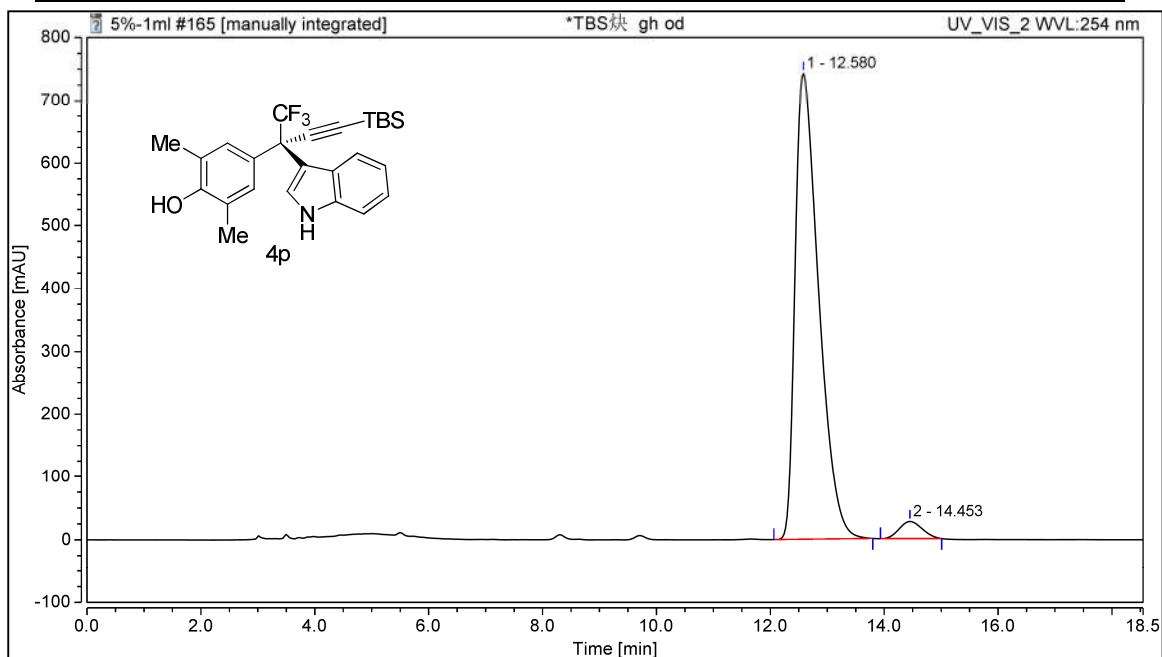

### Integration Results

| No.           | Peak Name | Retention Time<br>min | Area<br>mAU*min | Relative Area<br>% | Amount<br>n.a. |
|---------------|-----------|-----------------------|-----------------|--------------------|----------------|
| 1             |           | 12.580                | 355.461         | 96.57              | n.a.           |
| 2             |           | 14.453                | 12.629          | 3.43               | n.a.           |
| <b>Total:</b> |           |                       | <b>368.091</b>  | <b>100.00</b>      |                |

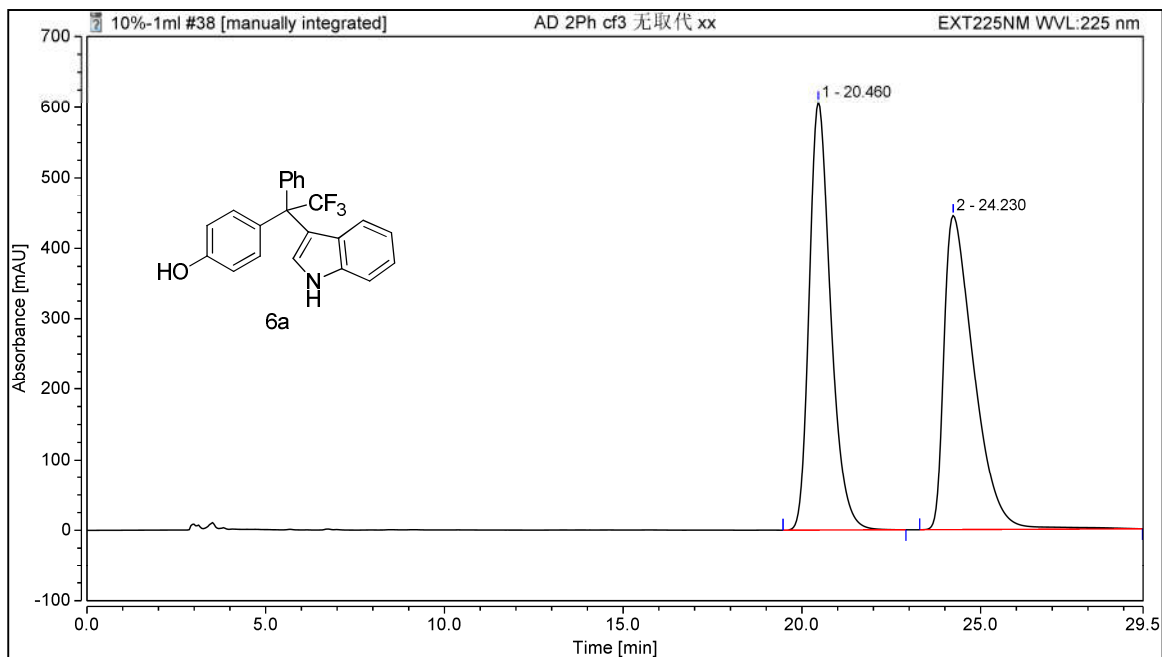

### Integration Results

| No.           | Peak Name | Retention Time<br>min | Area<br>mAU*min | Relative Area<br>% | Amount<br>n.a. |
|---------------|-----------|-----------------------|-----------------|--------------------|----------------|
| 1             |           | 20.460                | 421.820         | 49.43              | n.a.           |
| 2             |           | 24.230                | 431.583         | 50.57              | n.a.           |
| <b>Total:</b> |           |                       | <b>853.403</b>  | <b>100.00</b>      |                |

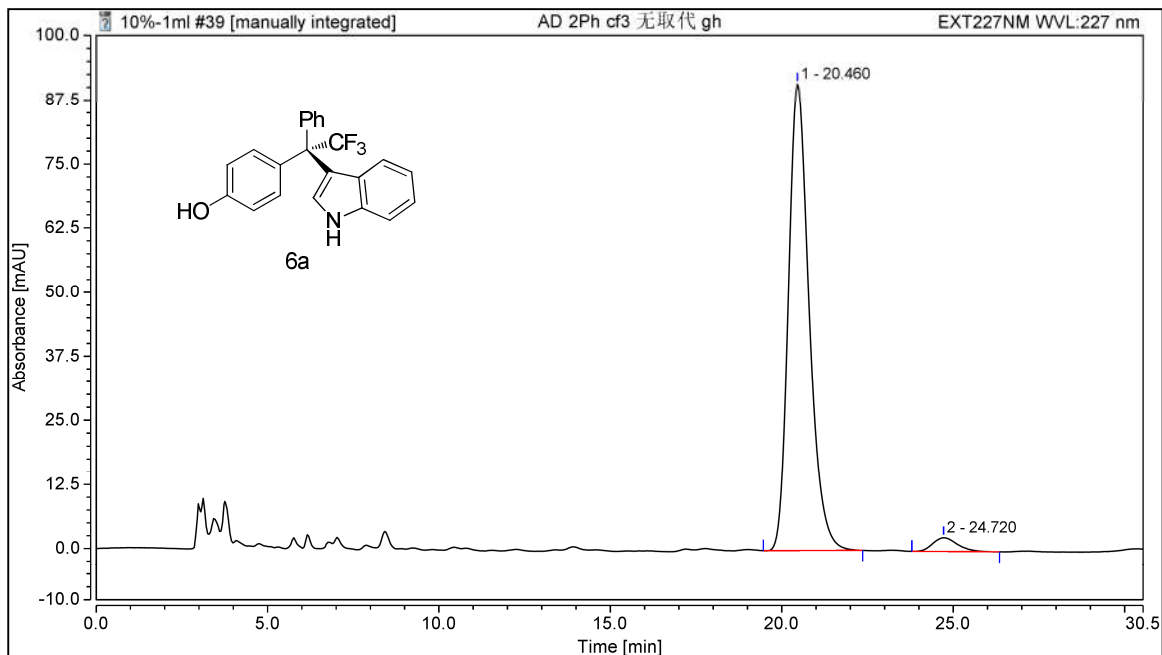

### Integration Results

| No.           | Peak Name | Retention Time<br>min | Area<br>mAU*min | Relative Area<br>% | Amount<br>n.a. |
|---------------|-----------|-----------------------|-----------------|--------------------|----------------|
| 1             |           | 20.460                | 63.696          | 96.59              | n.a.           |
| 2             |           | 24.720                | 2.247           | 3.41               | n.a.           |
| <b>Total:</b> |           |                       | <b>65.943</b>   | <b>100.00</b>      |                |



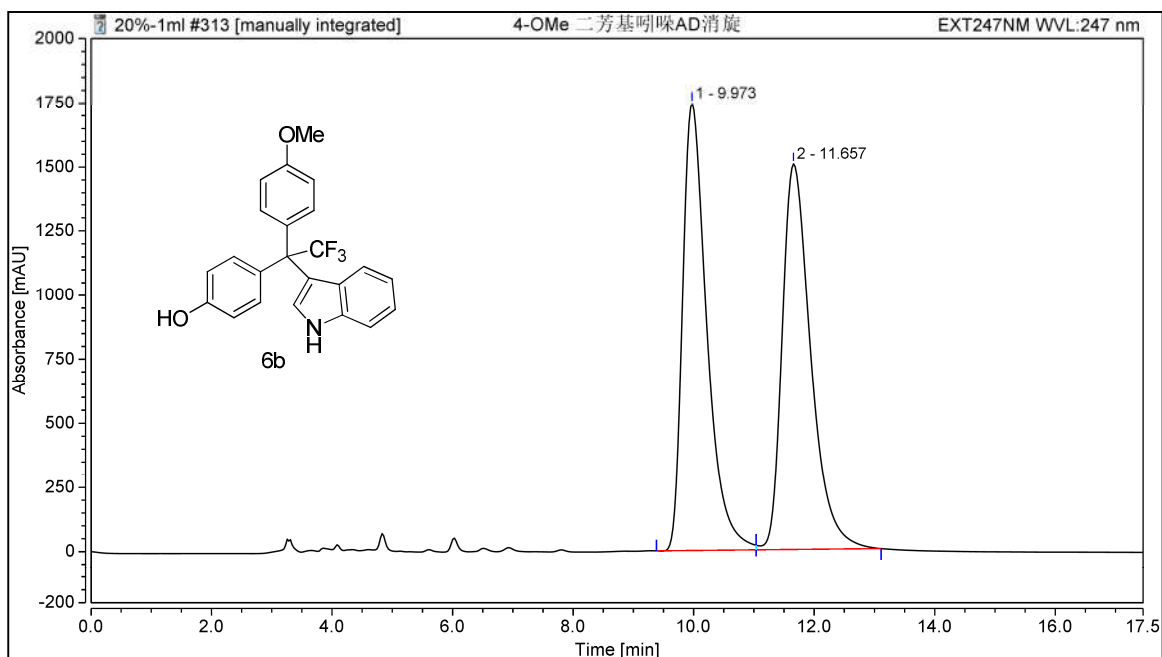

### Integration Results

| No.           | Peak Name | Retention Time<br>min | Area<br>mAU*min | Relative Area<br>% | Amount<br>n.a. |
|---------------|-----------|-----------------------|-----------------|--------------------|----------------|
| 1             |           | 9.973                 | 811.399         | 49.57              | n.a.           |
| 2             |           | 11.657                | 825.485         | 50.43              | n.a.           |
| <b>Total:</b> |           |                       | <b>1636.884</b> | <b>100.00</b>      |                |

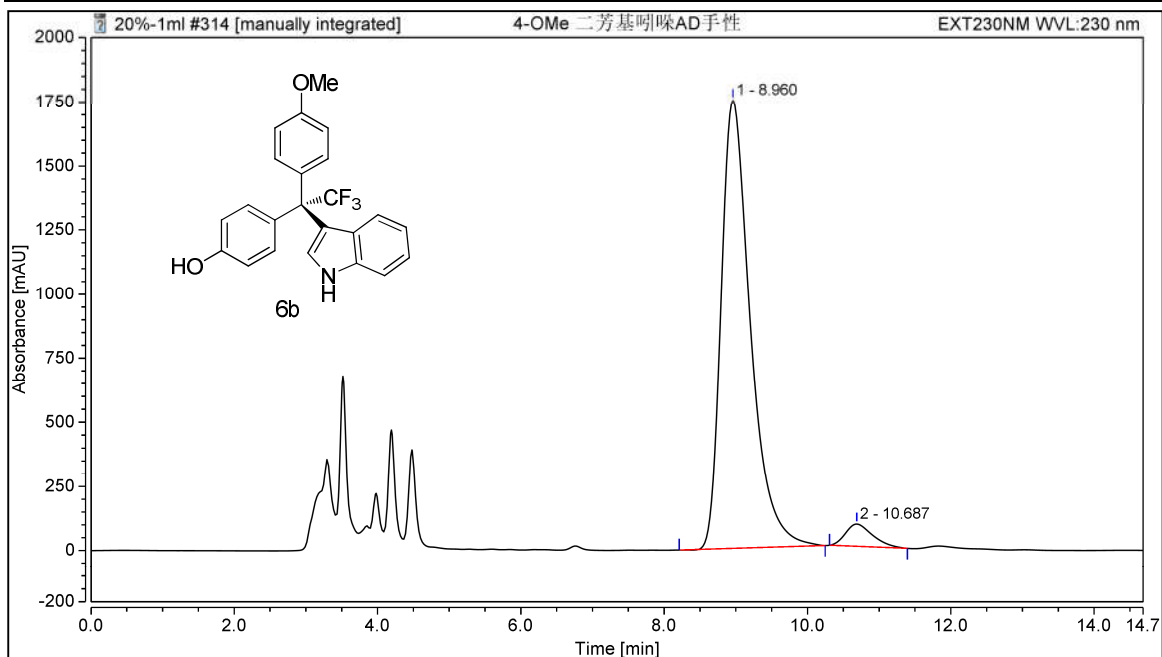

### Integration Results

| No.           | Peak Name | Retention Time<br>min | Height<br>mAU   | Relative Area<br>% | Amount<br>n.a. |
|---------------|-----------|-----------------------|-----------------|--------------------|----------------|
| 1             |           | 8.960                 | 1748.946        | 95.59              | n.a.           |
| 2             |           | 10.687                | 86.571          | 4.41               | n.a.           |
| <b>Total:</b> |           |                       | <b>1835.517</b> | <b>100.00</b>      |                |

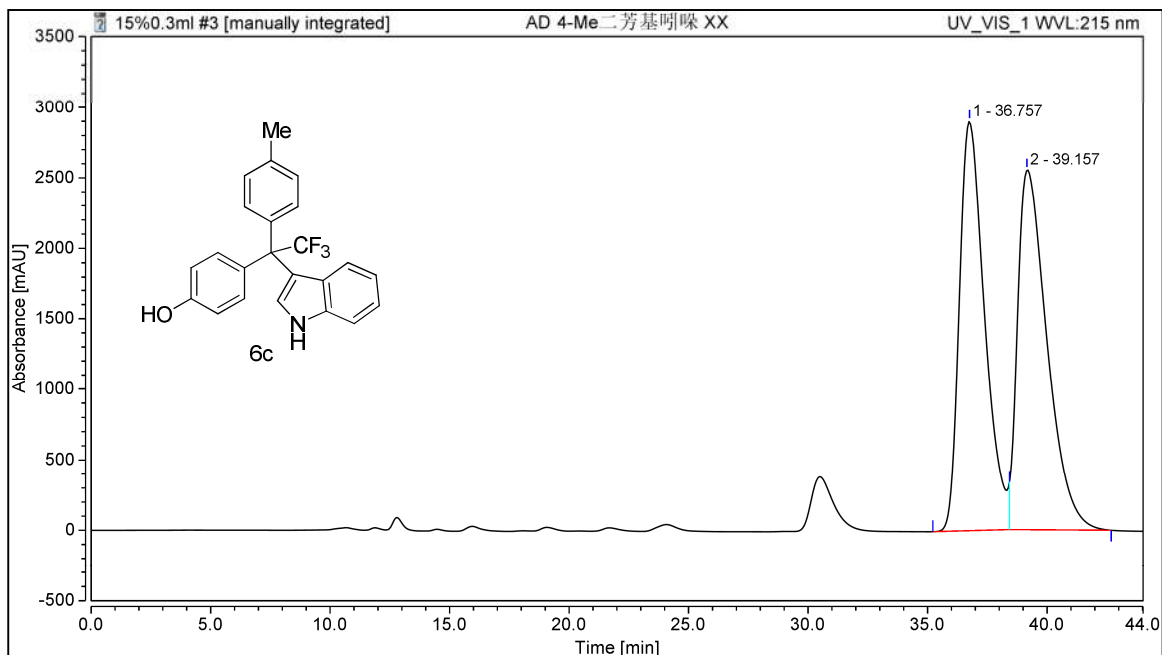

### Integration Results

| No.           | Peak Name | Retention Time<br>min | Area<br>mAU*min | Relative Area<br>% | Amount<br>n.a. |
|---------------|-----------|-----------------------|-----------------|--------------------|----------------|
| 1             |           | 36.757                | 3557.996        | 49.40              | n.a.           |
| 2             |           | 39.157                | 3644.874        | 50.60              | n.a.           |
| <b>Total:</b> |           |                       | <b>7202.870</b> | <b>100.00</b>      |                |

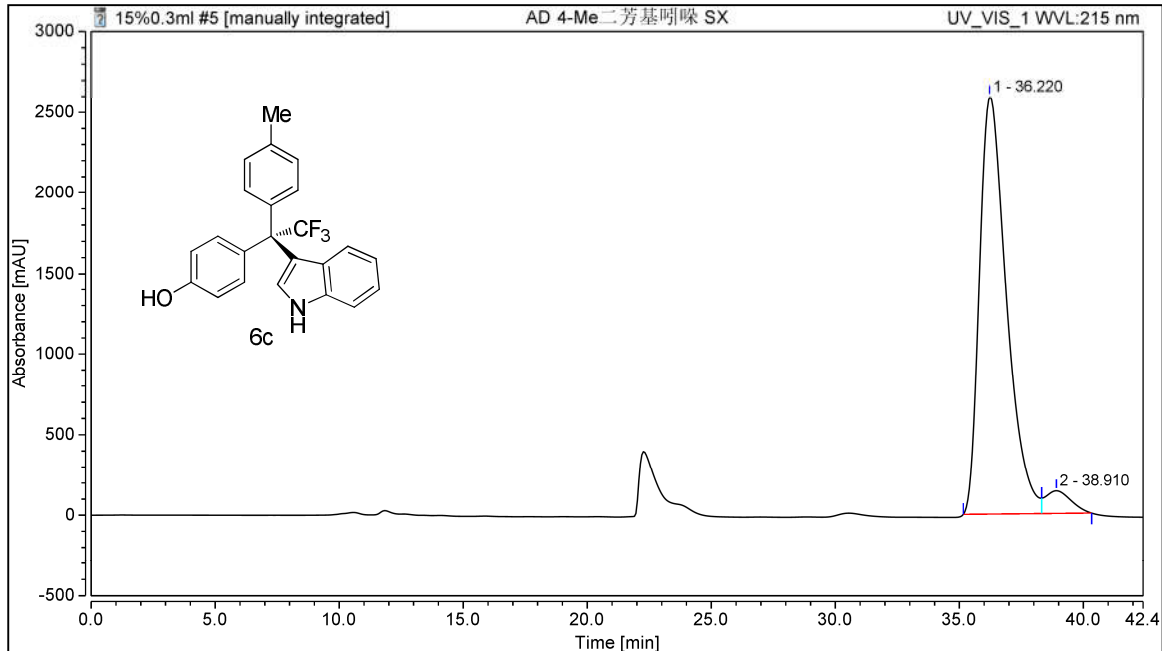

### Integration Results

| No.           | Peak Name | Retention Time<br>min | Area<br>mAU*min | Relative Area<br>% | Amount<br>n.a. |
|---------------|-----------|-----------------------|-----------------|--------------------|----------------|
| 1             |           | 36.220                | 3268.815        | 95.14              | n.a.           |
| 2             |           | 38.910                | 166.839         | 4.86               | n.a.           |
| <b>Total:</b> |           |                       | <b>3435.654</b> | <b>100.00</b>      |                |

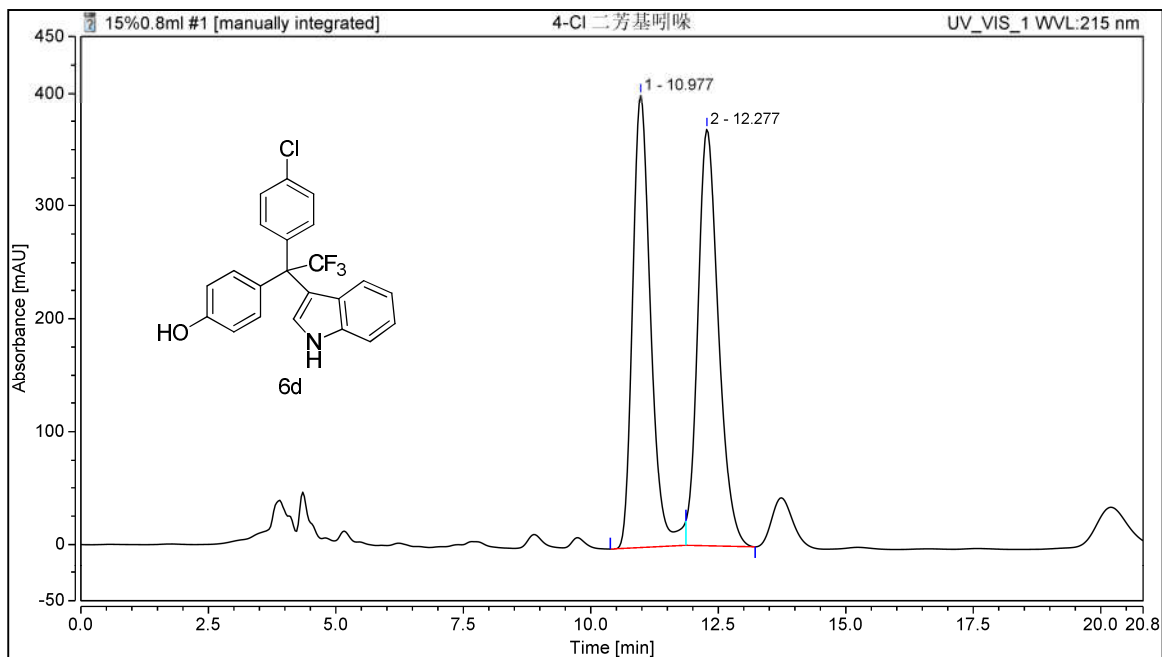

### Integration Results

| No.           | Peak Name | Retention Time<br>min | Area<br>mAU*min | Relative Area<br>% | Amount<br>n.a. |
|---------------|-----------|-----------------------|-----------------|--------------------|----------------|
| 1             |           | 10.977                | 164.824         | 48.79              | n.a.           |
| 2             |           | 12.277                | 172.996         | 51.21              | n.a.           |
| <b>Total:</b> |           |                       | <b>337.820</b>  | <b>100.00</b>      |                |

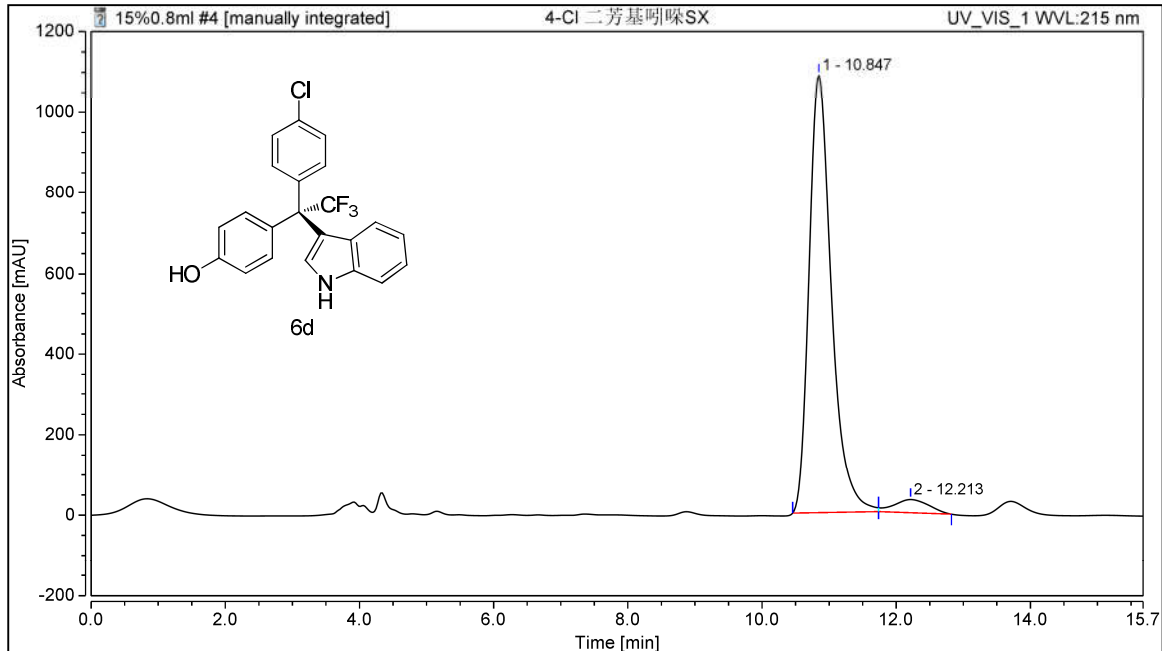

### Integration Results

| No.           | Peak Name | Retention Time<br>min | Area<br>mAU*min | Relative Area<br>% | Amount<br>n.a. |
|---------------|-----------|-----------------------|-----------------|--------------------|----------------|
| 1             |           | 10.847                | 419.180         | 95.50              | n.a.           |
| 2             |           | 12.213                | 19.764          | 4.50               | n.a.           |
| <b>Total:</b> |           |                       | <b>438.944</b>  | <b>100.00</b>      |                |

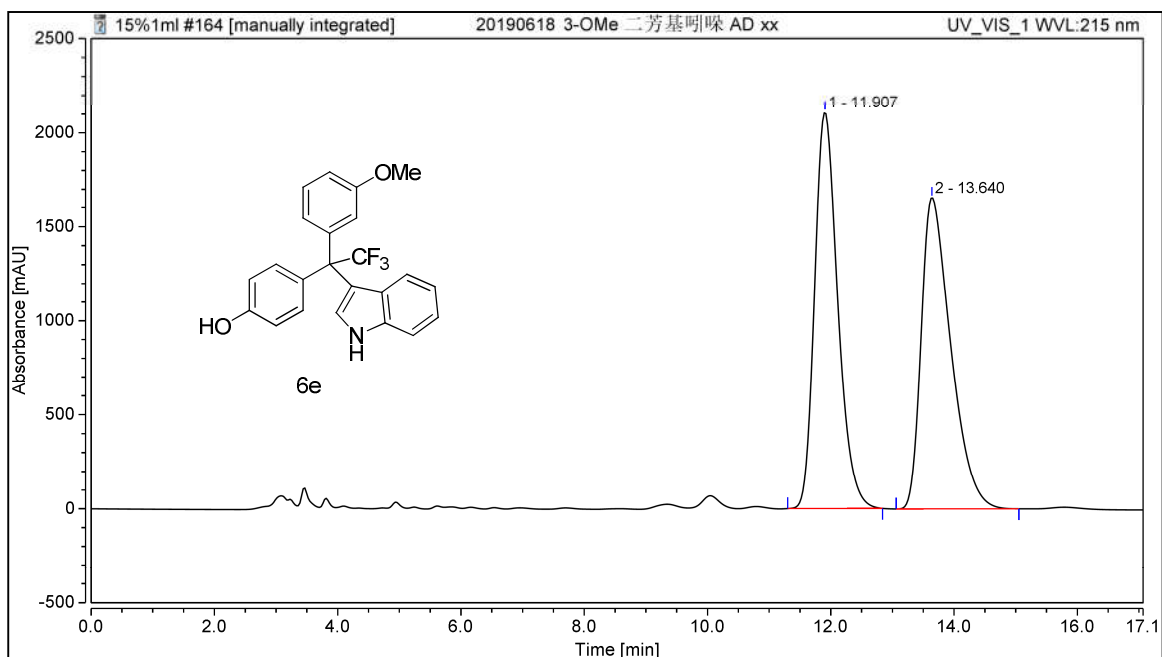

### Integration Results

| No.           | Peak Name | Retention Time<br>min | Area<br>mAU*min | Relative Area<br>% | Amount<br>n.a. |
|---------------|-----------|-----------------------|-----------------|--------------------|----------------|
| 1             |           | 11.907                | 915.139         | 49.93              | n.a.           |
| 2             |           | 13.640                | 917.875         | 50.07              | n.a.           |
| <b>Total:</b> |           |                       | <b>1833.014</b> | <b>100.00</b>      |                |

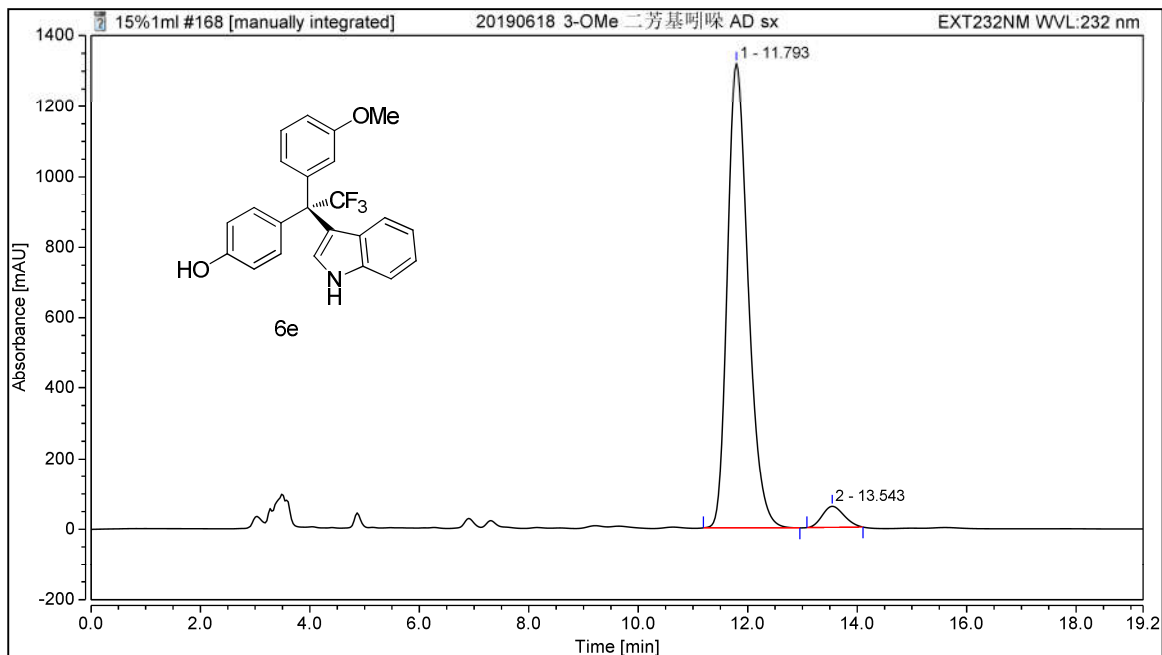

### Integration Results

| No.           | Peak Name | Retention Time<br>min | Area<br>mAU*min | Relative Area<br>% | Amount<br>n.a. |
|---------------|-----------|-----------------------|-----------------|--------------------|----------------|
| 1             |           | 11.793                | 578.687         | 95.48              | n.a.           |
| 2             |           | 13.543                | 27.396          | 4.52               | n.a.           |
| <b>Total:</b> |           |                       | <b>606.083</b>  | <b>100.00</b>      |                |

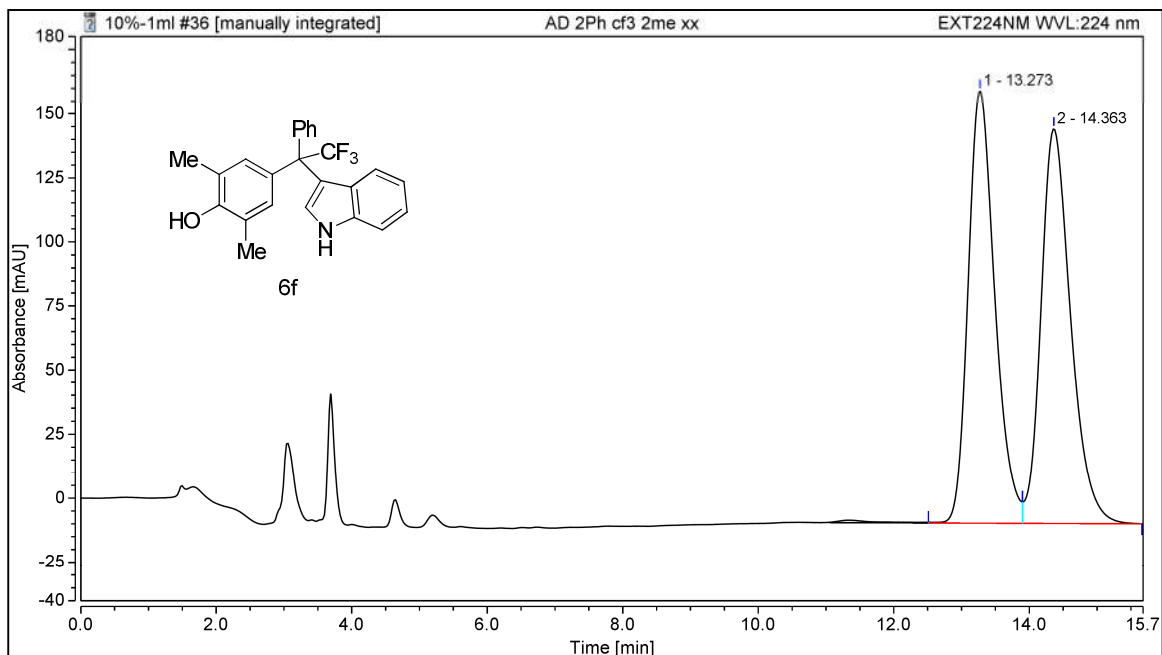

### Integration Results

| No.           | Peak Name | Retention Time<br>min | Area<br>mAU*min | Relative Area<br>% | Amount<br>n.a. |
|---------------|-----------|-----------------------|-----------------|--------------------|----------------|
| 1             |           | 13.273                | 76.886          | 49.62              | n.a.           |
| 2             |           | 14.363                | 78.078          | 50.38              | n.a.           |
| <b>Total:</b> |           |                       | <b>154.965</b>  | <b>100.00</b>      |                |

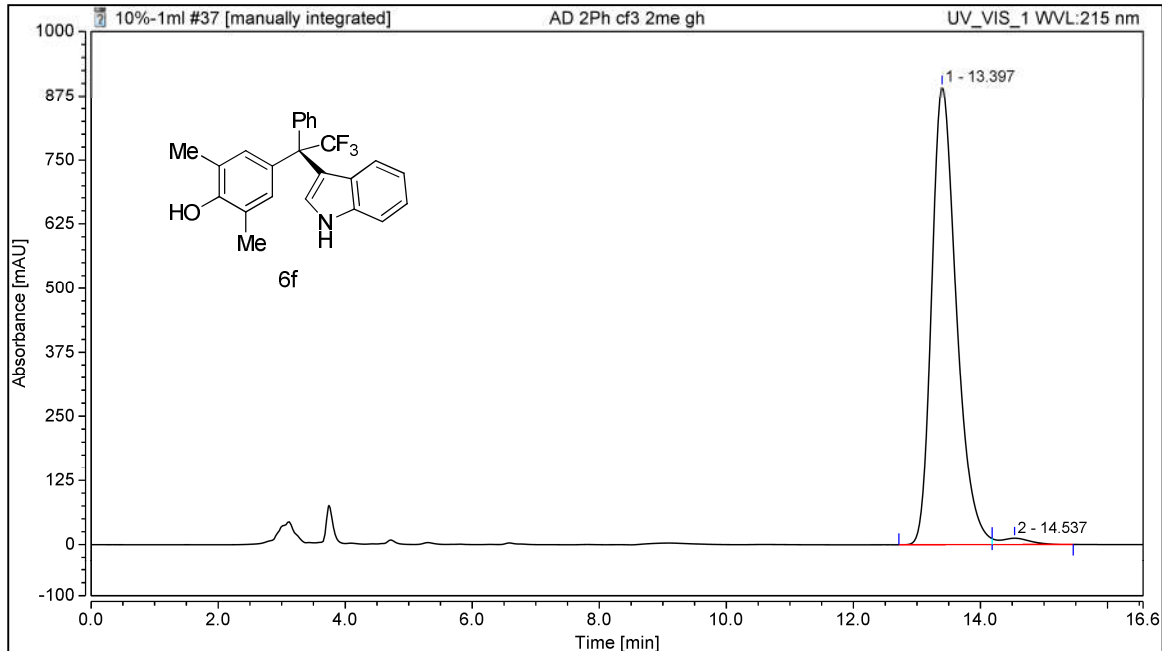

### Integration Results

| No.           | Peak Name | Retention Time<br>min | Area<br>mAU*min | Relative Area<br>% | Amount<br>n.a. |
|---------------|-----------|-----------------------|-----------------|--------------------|----------------|
| 1             |           | 13.397                | 401.569         | 98.24              | n.a.           |
| 2             |           | 14.537                | 7.192           | 1.76               | n.a.           |
| <b>Total:</b> |           |                       | <b>408.761</b>  | <b>100.00</b>      |                |

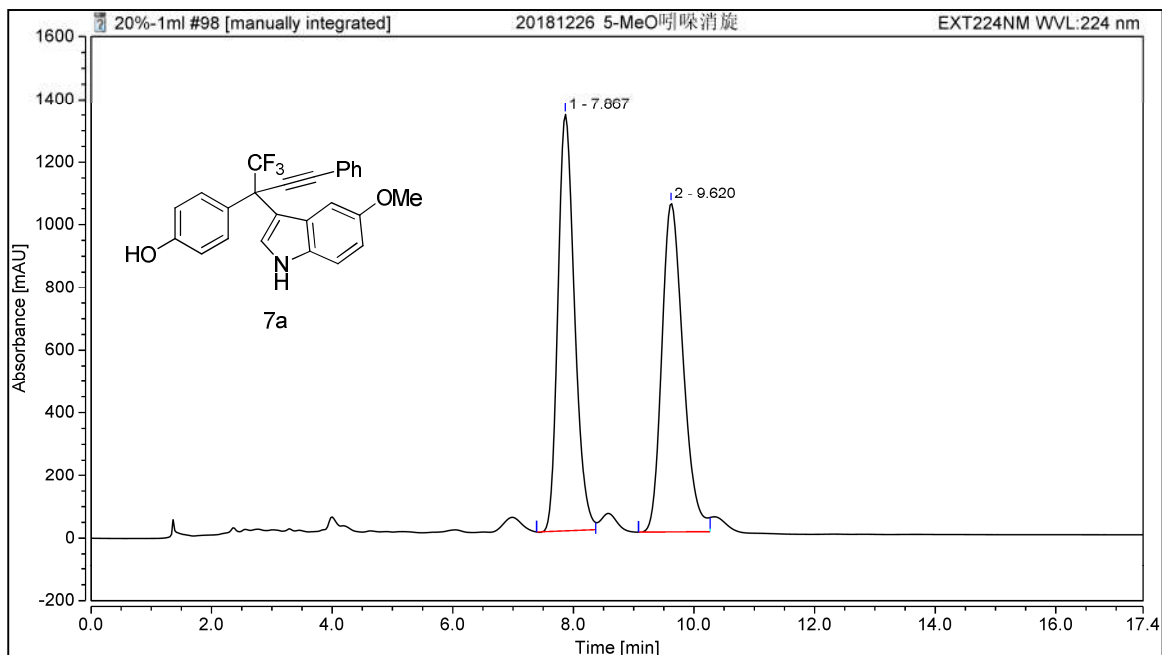

### Integration Results

| No.           | Peak Name | Retention Time<br>min | Area<br>mAU*min | Relative Area<br>% | Amount<br>n.a. |
|---------------|-----------|-----------------------|-----------------|--------------------|----------------|
| 1             |           | 7.867                 | 424.934         | 49.75              | n.a.           |
| 2             |           | 9.620                 | 429.137         | 50.25              | n.a.           |
| <b>Total:</b> |           |                       | <b>854.071</b>  | <b>100.00</b>      |                |

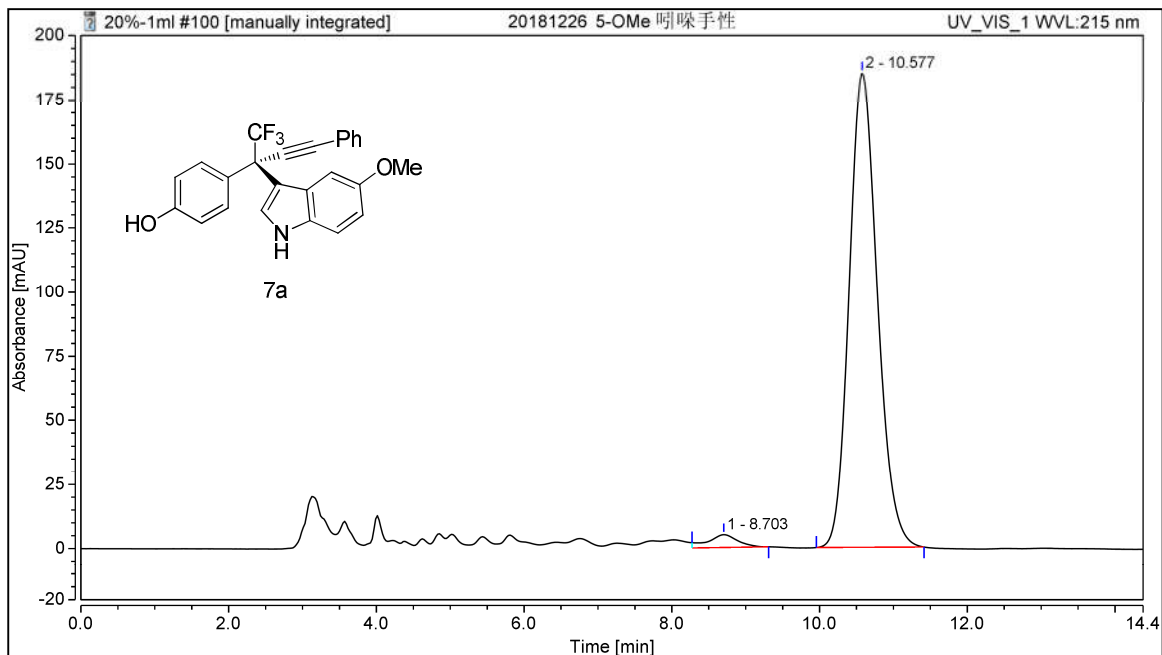

### Integration Results

| No.           | Peak Name | Retention Time<br>min | Area<br>mAU*min | Relative Area<br>% | Amount<br>n.a. |
|---------------|-----------|-----------------------|-----------------|--------------------|----------------|
| 1             |           | 8.703                 | 1.948           | 2.33               | n.a.           |
| 2             |           | 10.577                | 81.678          | 97.67              | n.a.           |
| <b>Total:</b> |           |                       | <b>83.626</b>   | <b>100.00</b>      |                |

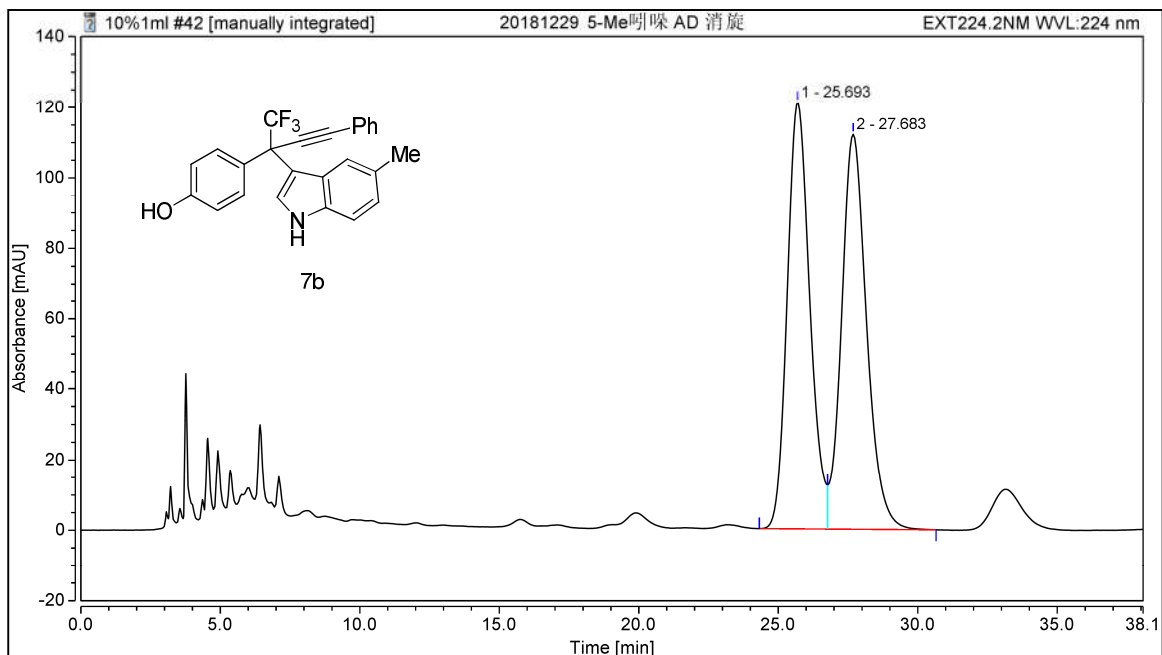

### Integration Results

| No.           | Peak Name | Retention Time<br>min | Area<br>mAU*min | Relative Area<br>% | Amount<br>n.a. |
|---------------|-----------|-----------------------|-----------------|--------------------|----------------|
| 1             |           | 25.693                | 113.412         | 49.31              | n.a.           |
| 2             |           | 27.683                | 116.578         | 50.69              | n.a.           |
| <b>Total:</b> |           |                       | <b>229.990</b>  | <b>100.00</b>      |                |

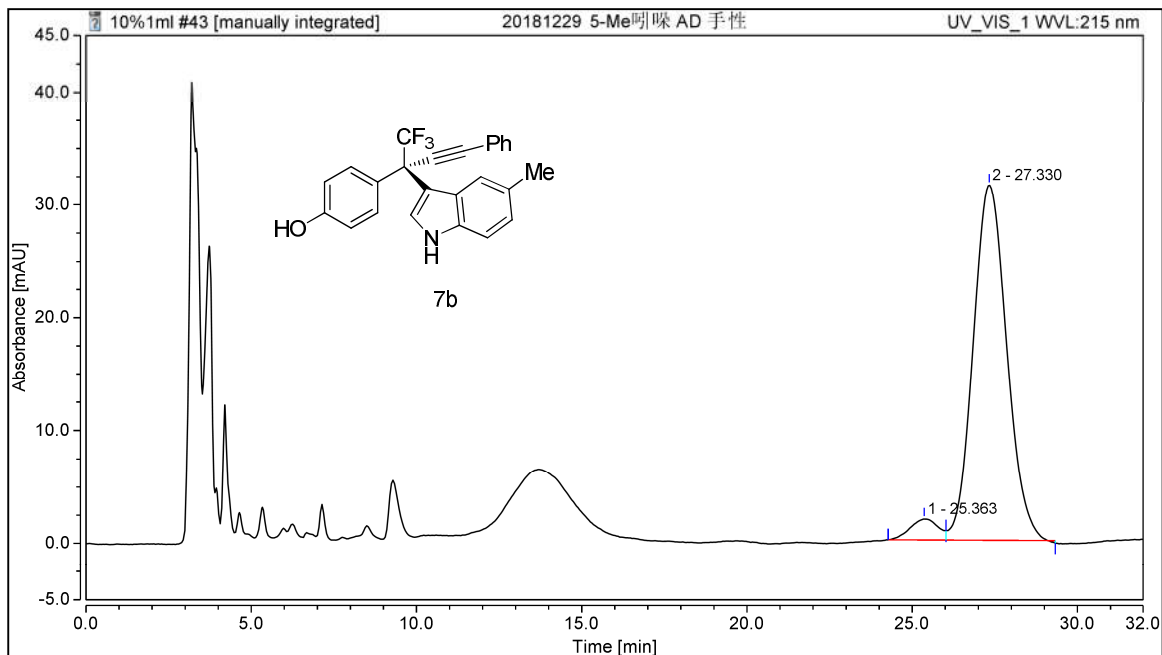

### Integration Results

| No.           | Peak Name | Retention Time<br>min | Area<br>mAU*min | Relative Area<br>% | Amount<br>n.a. |
|---------------|-----------|-----------------------|-----------------|--------------------|----------------|
| 1             |           | 25.420                | 1.237           | 4.88               | n.a.           |
| 2             |           | 27.323                | 24.090          | 95.12              | n.a.           |
| <b>Total:</b> |           |                       | <b>25.327</b>   | <b>100.00</b>      |                |

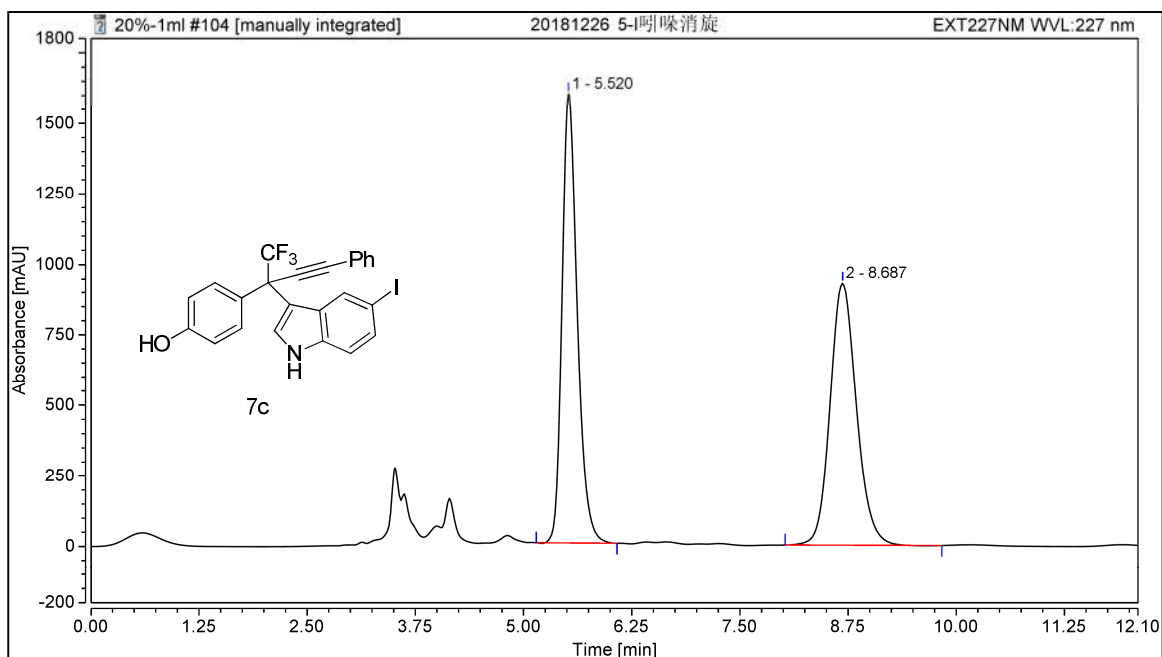

### Integration Results

| No.           | Peak Name | Retention Time<br>min | Area<br>mAU*min | Relative Area<br>% | Amount<br>n.a. |
|---------------|-----------|-----------------------|-----------------|--------------------|----------------|
| 1             |           | 5.520                 | 324.727         | 49.80              | n.a.           |
| 2             |           | 8.687                 | 327.276         | 50.20              | n.a.           |
| <b>Total:</b> |           |                       | <b>652.003</b>  | <b>100.00</b>      |                |

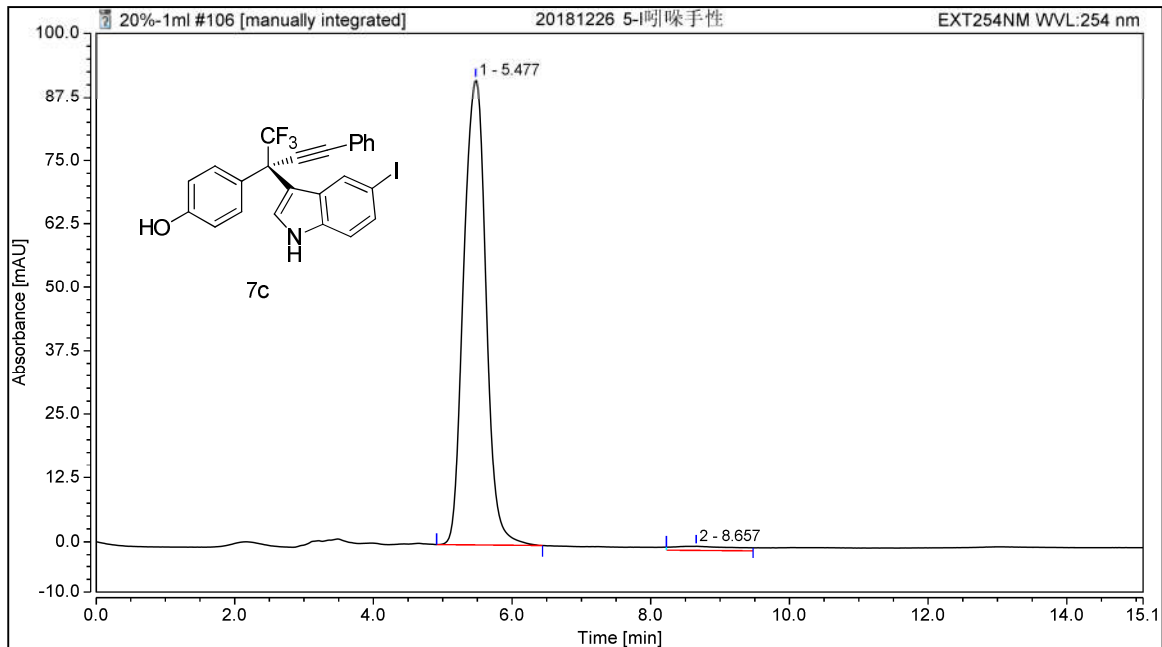

### Integration Results

| No.           | Peak Name | Retention Time<br>min | Area<br>mAU*min | Relative Area<br>% | Amount<br>n.a. |
|---------------|-----------|-----------------------|-----------------|--------------------|----------------|
| 1             |           | 5.477                 | 34.035          | 97.56              | n.a.           |
| 2             |           | 8.657                 | 0.850           | 2.44               | n.a.           |
| <b>Total:</b> |           |                       | <b>34.885</b>   | <b>100.00</b>      |                |



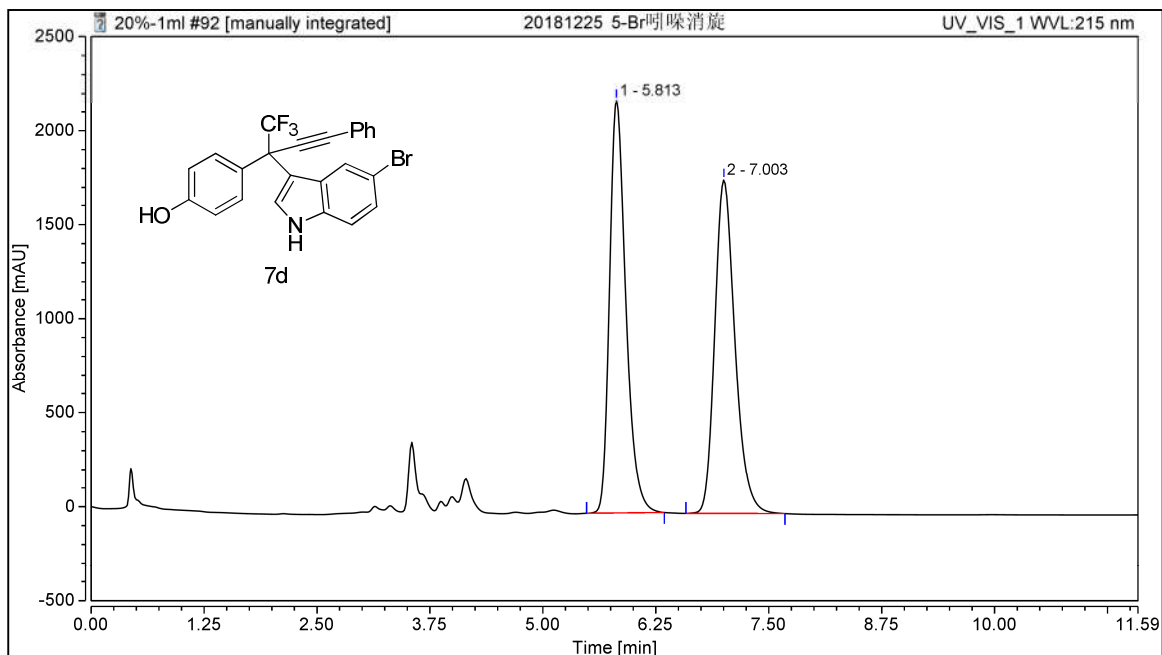

### Integration Results

| No.           | Peak Name | Retention Time<br>min | Area<br>mAU*min | Relative Area<br>% | Amount<br>n.a. |
|---------------|-----------|-----------------------|-----------------|--------------------|----------------|
| 1             |           | 5.813                 | 458.454         | 49.99              | n.a.           |
| 2             |           | 7.003                 | 458.582         | 50.01              | n.a.           |
| <b>Total:</b> |           |                       | <b>917.036</b>  | <b>100.00</b>      |                |

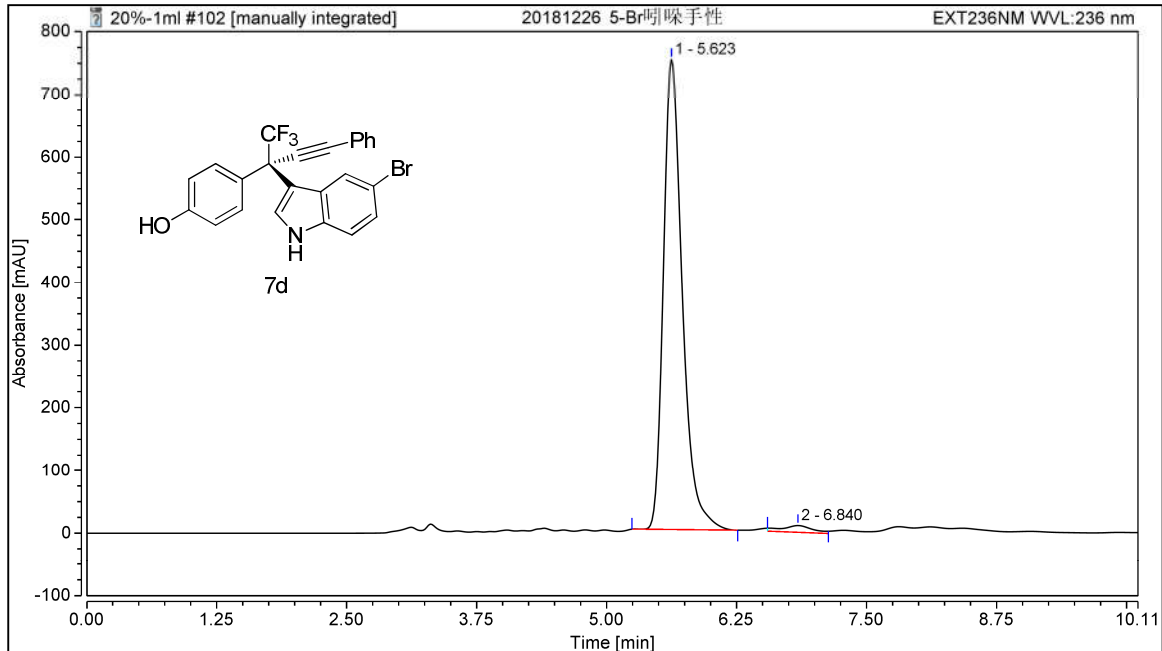

### Integration Results

| No.           | Peak Name | Retention Time<br>min | Area<br>mAU*min | Relative Area<br>% | Amount<br>n.a. |
|---------------|-----------|-----------------------|-----------------|--------------------|----------------|
| 1             |           | 5.623                 | 157.889         | 97.68              | n.a.           |
| 2             |           | 6.840                 | 3.752           | 2.32               | n.a.           |
| <b>Total:</b> |           |                       | <b>161.641</b>  | <b>100.00</b>      |                |

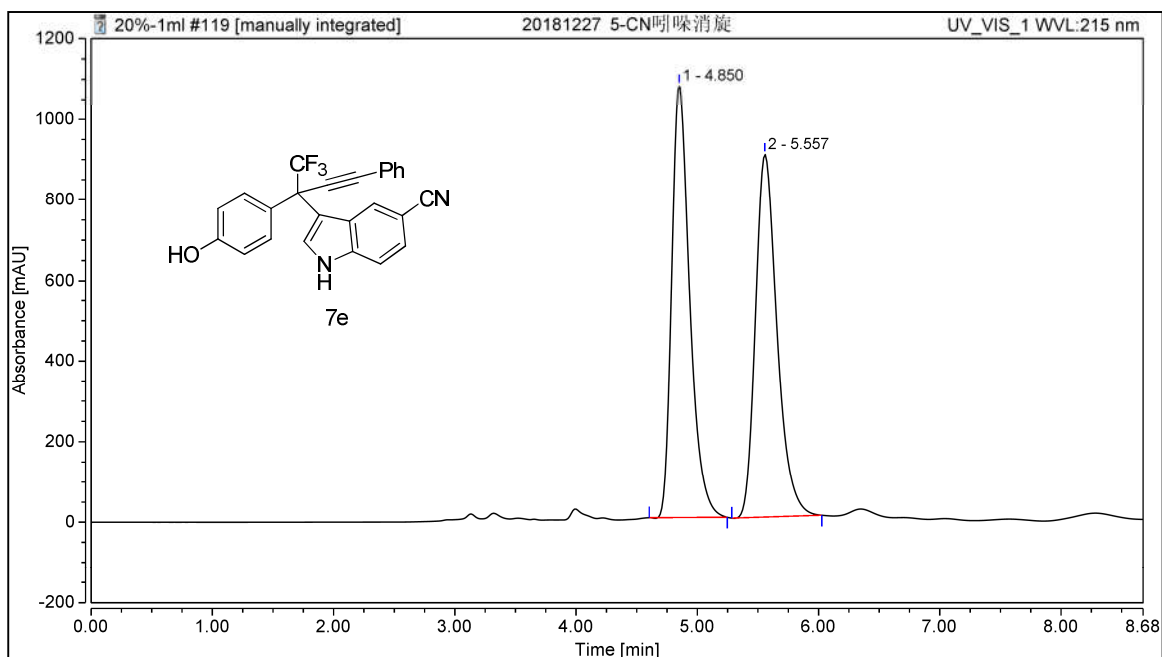

### Integration Results

| No.           | Peak Name | Retention Time<br>min | Area<br>mAU*min | Relative Area<br>% | Amount<br>n.a. |
|---------------|-----------|-----------------------|-----------------|--------------------|----------------|
| 1             |           | 4.850                 | 184.602         | 49.86              | n.a.           |
| 2             |           | 5.557                 | 185.611         | 50.14              | n.a.           |
| <b>Total:</b> |           |                       | <b>370.213</b>  | <b>100.00</b>      |                |

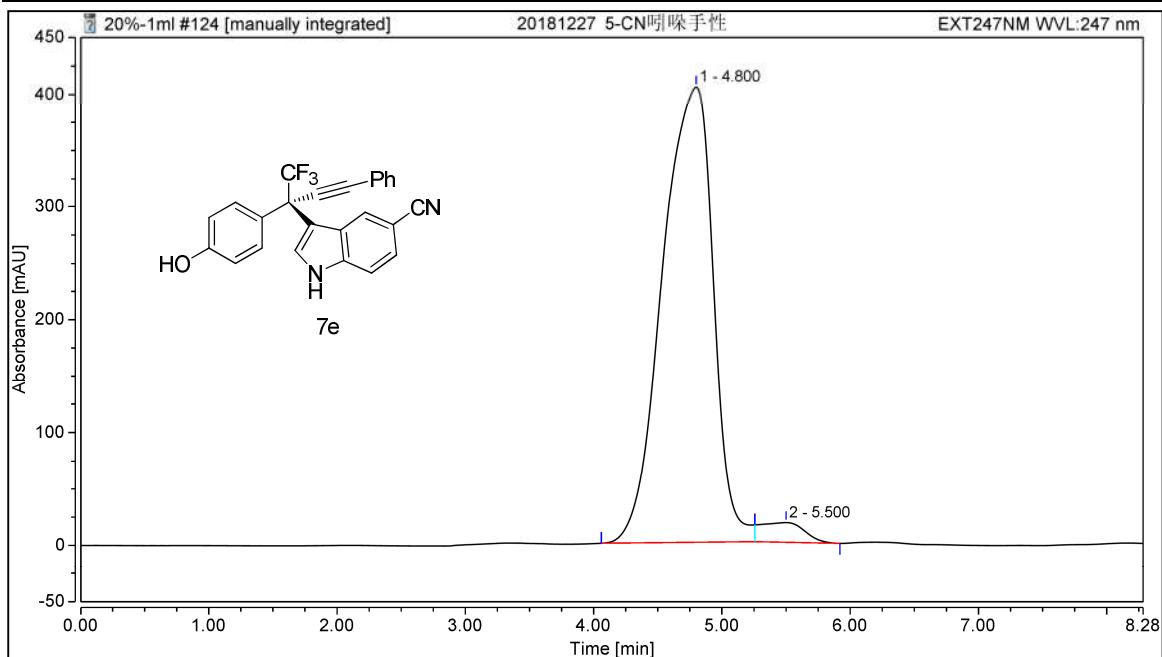

### Integration Results

| No.           | Peak Name | Retention Time<br>min | Area<br>mAU*min | Relative Area<br>% | Amount<br>n.a. |
|---------------|-----------|-----------------------|-----------------|--------------------|----------------|
| 1             |           | 4.800                 | 185.441         | 96.40              | n.a.           |
| 2             |           | 5.500                 | 6.921           | 3.60               | n.a.           |
| <b>Total:</b> |           |                       | <b>192.362</b>  | <b>100.00</b>      |                |

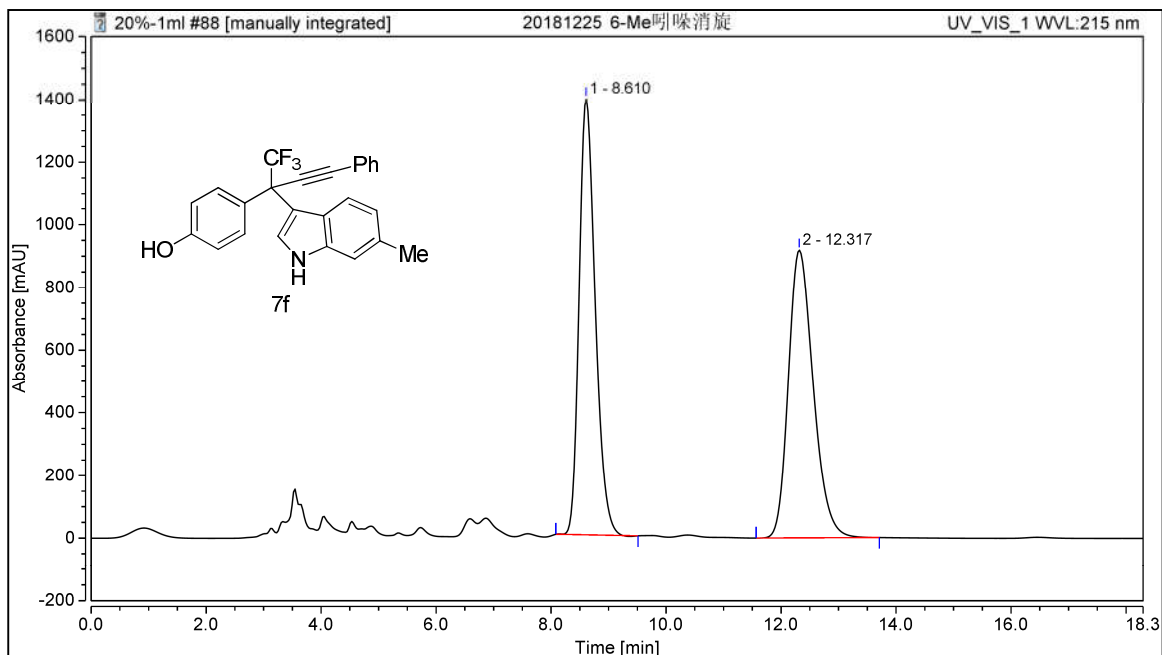

### Integration Results

| No.           | Peak Name | Retention Time<br>min | Area<br>mAU*min | Relative Area<br>% | Amount<br>n.a. |
|---------------|-----------|-----------------------|-----------------|--------------------|----------------|
| 1             |           | 8.610                 | 451.942         | 49.59              | n.a.           |
| 2             |           | 12.317                | 459.405         | 50.41              | n.a.           |
| <b>Total:</b> |           |                       | <b>911.347</b>  | <b>100.00</b>      |                |

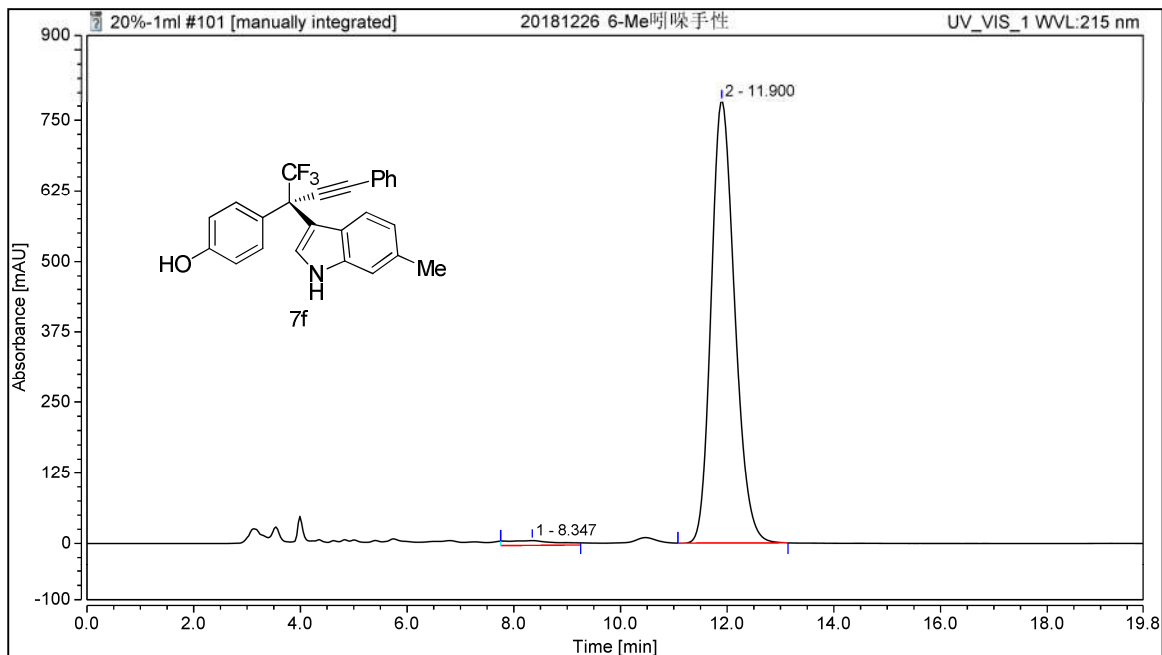

### Integration Results

| No.           | Peak Name | Retention Time<br>min | Area<br>mAU*min | Relative Area<br>% | Amount<br>n.a. |
|---------------|-----------|-----------------------|-----------------|--------------------|----------------|
| 1             |           | 8.347                 | 8.559           | 2.09               | n.a.           |
| 2             |           | 11.900                | 400.564         | 97.91              | n.a.           |
| <b>Total:</b> |           |                       | <b>409.123</b>  | <b>100.00</b>      |                |

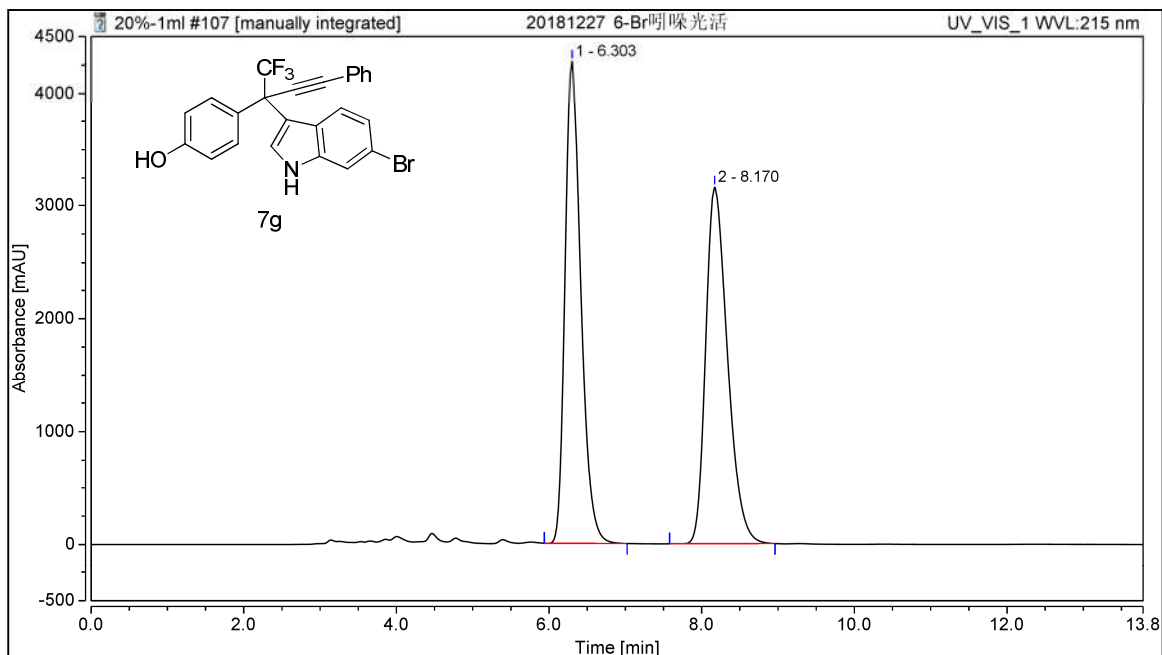

### Integration Results

| No.           | Peak Name | Retention Time<br>min | Area<br>mAU*min | Relative Area<br>% | Amount<br>n.a. |
|---------------|-----------|-----------------------|-----------------|--------------------|----------------|
| 1             |           | 6.303                 | 1027.966        | 49.62              | n.a.           |
| 2             |           | 8.170                 | 1043.722        | 50.38              | n.a.           |
| <b>Total:</b> |           |                       | <b>2071.687</b> | <b>100.00</b>      |                |

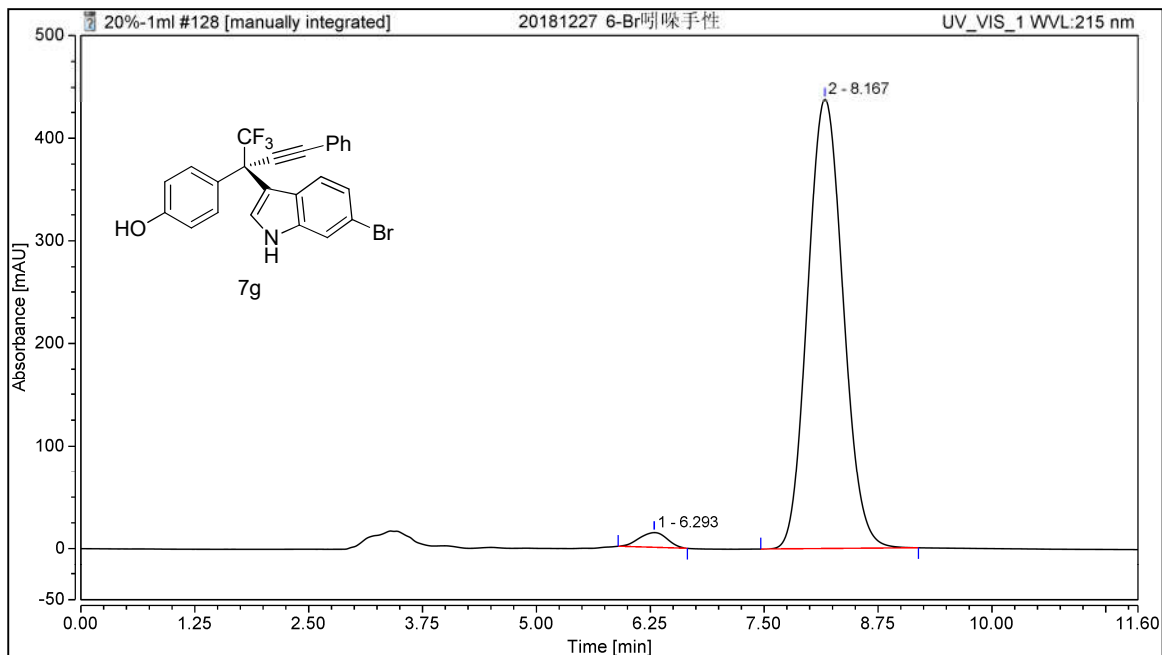

### Integration Results

| No.           | Peak Name | Retention Time<br>min | Area<br>mAU*min | Relative Area<br>% | Amount<br>n.a. |
|---------------|-----------|-----------------------|-----------------|--------------------|----------------|
| 1             |           | 6.293                 | 5.082           | 2.50               | n.a.           |
| 2             |           | 8.167                 | 197.806         | 97.50              | n.a.           |
| <b>Total:</b> |           |                       | <b>202.888</b>  | <b>100.00</b>      |                |

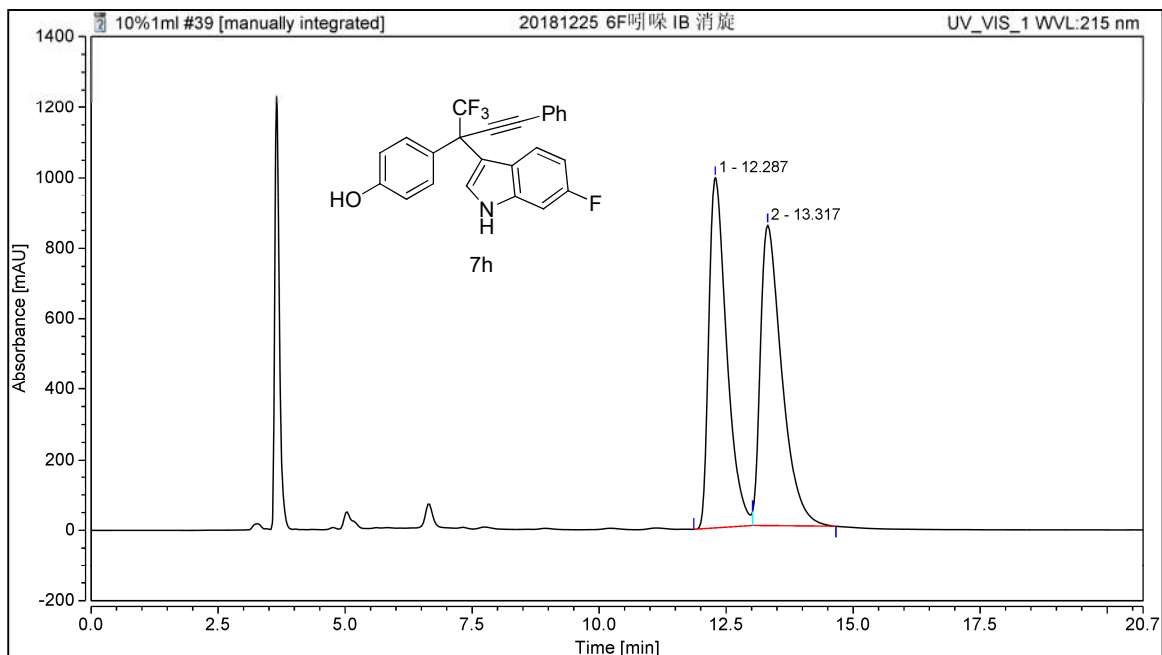

### Integration Results

| No.           | Peak Name | Retention Time<br>min | Area<br>mAU*min | Relative Area<br>% | Amount<br>n.a. |
|---------------|-----------|-----------------------|-----------------|--------------------|----------------|
| 1             |           | 12.287                | 405.362         | 49.26              | n.a.           |
| 2             |           | 13.317                | 417.541         | 50.74              | n.a.           |
| <b>Total:</b> |           |                       | <b>822.903</b>  | <b>100.00</b>      |                |

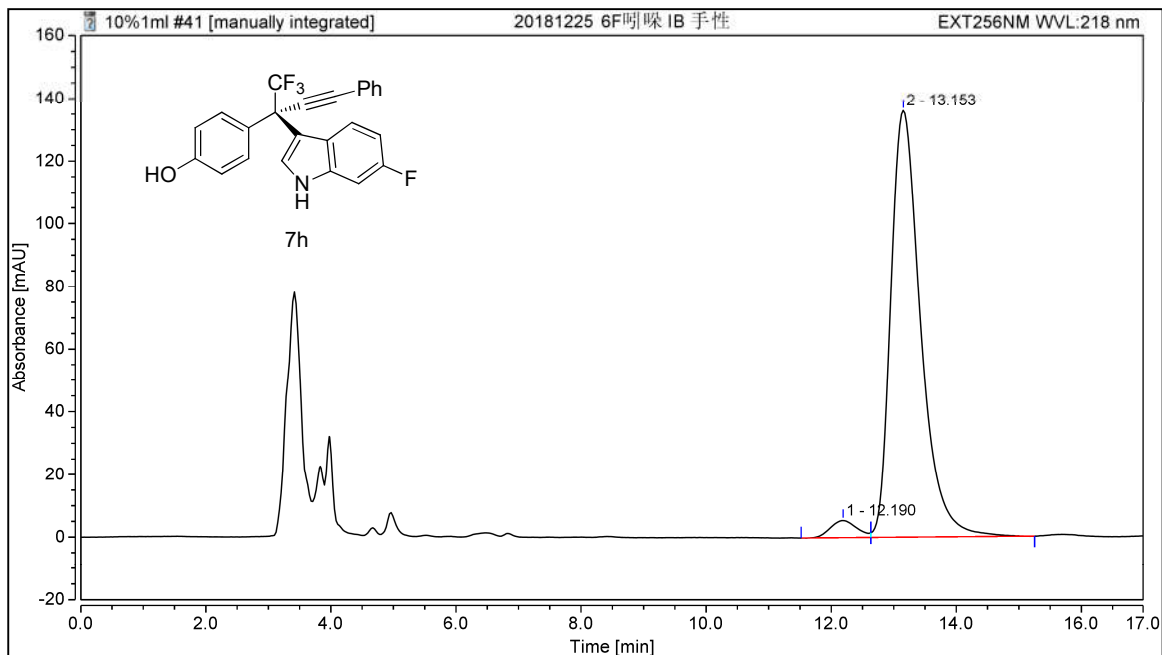

### Integration Results

| No.           | Peak Name | Retention Time<br>min | Area<br>mAU*min | Relative Area<br>% | Amount<br>n.a. |
|---------------|-----------|-----------------------|-----------------|--------------------|----------------|
| 1             |           | 12.190                | 2.681           | 3.45               | n.a.           |
| 2             |           | 13.153                | 75.079          | 96.55              | n.a.           |
| <b>Total:</b> |           |                       | <b>77.760</b>   | <b>100.00</b>      |                |

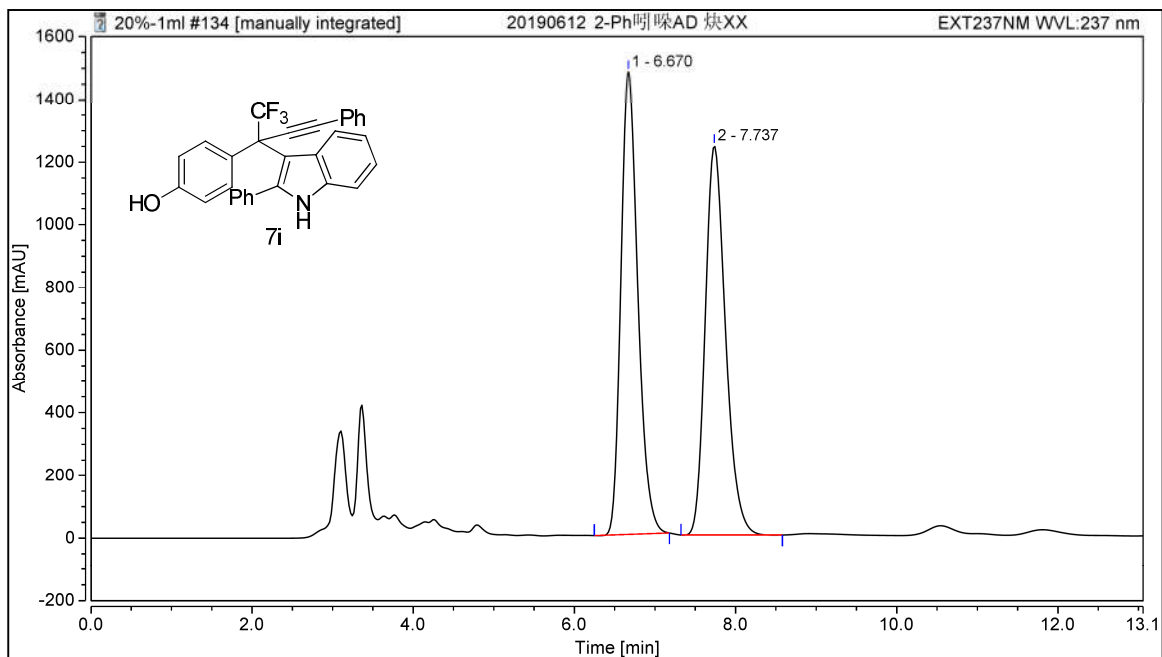

### Integration Results

| No.           | Peak Name | Retention Time<br>min | Area<br>mAU*min | Relative Area<br>% | Amount<br>n.a. |
|---------------|-----------|-----------------------|-----------------|--------------------|----------------|
| 1             |           | 6.670                 | 359.581         | 49.84              | n.a.           |
| 2             |           | 7.737                 | 361.928         | 50.16              | n.a.           |
| <b>Total:</b> |           |                       | <b>721.509</b>  | <b>100.00</b>      |                |

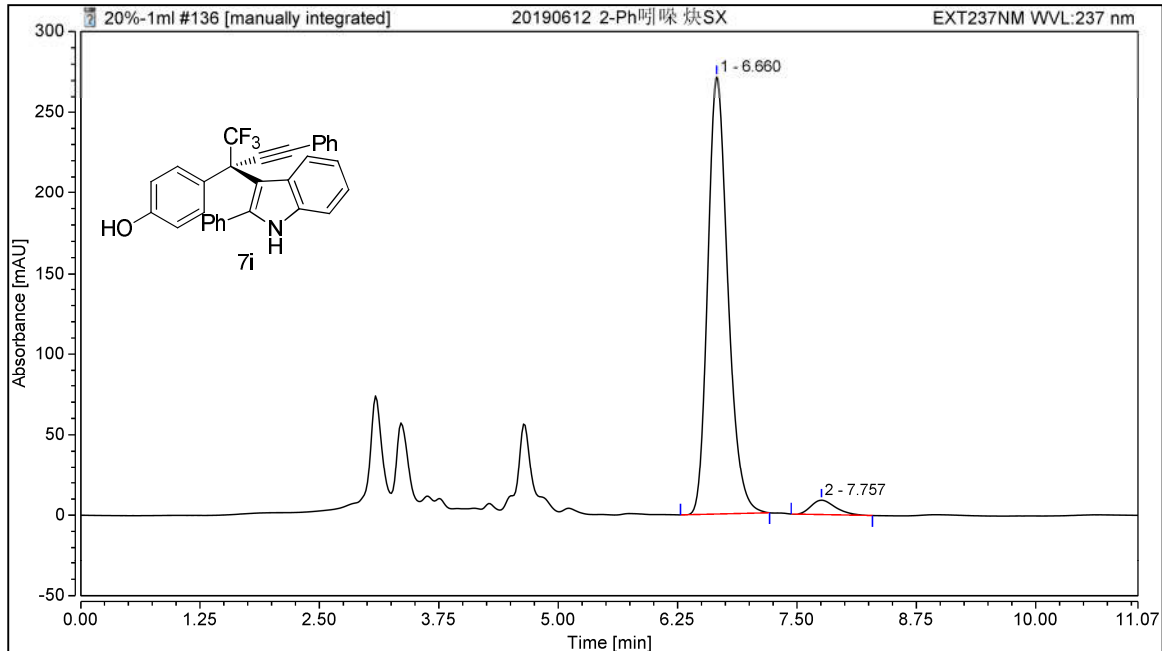

### Integration Results

| No.           | Peak Name | Retention Time<br>min | Area<br>mAU*min | Relative Area<br>% | Amount<br>n.a. |
|---------------|-----------|-----------------------|-----------------|--------------------|----------------|
| 1             |           | 6.660                 | 66.229          | 96.16              | n.a.           |
| 2             |           | 7.757                 | 2.644           | 3.84               | n.a.           |
| <b>Total:</b> |           |                       | <b>68.872</b>   | <b>100.00</b>      |                |

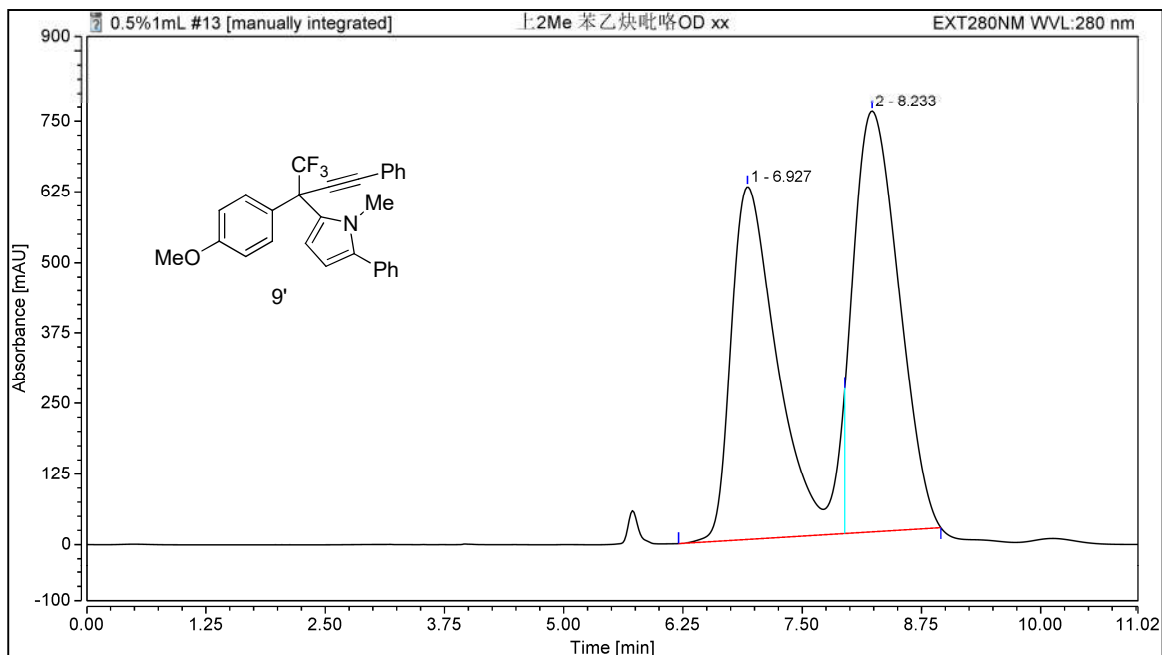

### Integration Results

| No.           | Peak Name | Retention Time<br>min | Area<br>mAU*min | Relative Area<br>% | Amount<br>n.a. |
|---------------|-----------|-----------------------|-----------------|--------------------|----------------|
| 1             |           | 6.927                 | 366.917         | 47.48              | n.a.           |
| 2             |           | 8.233                 | 405.908         | 52.52              | n.a.           |
| <b>Total:</b> |           |                       | <b>772.825</b>  | <b>100.00</b>      |                |

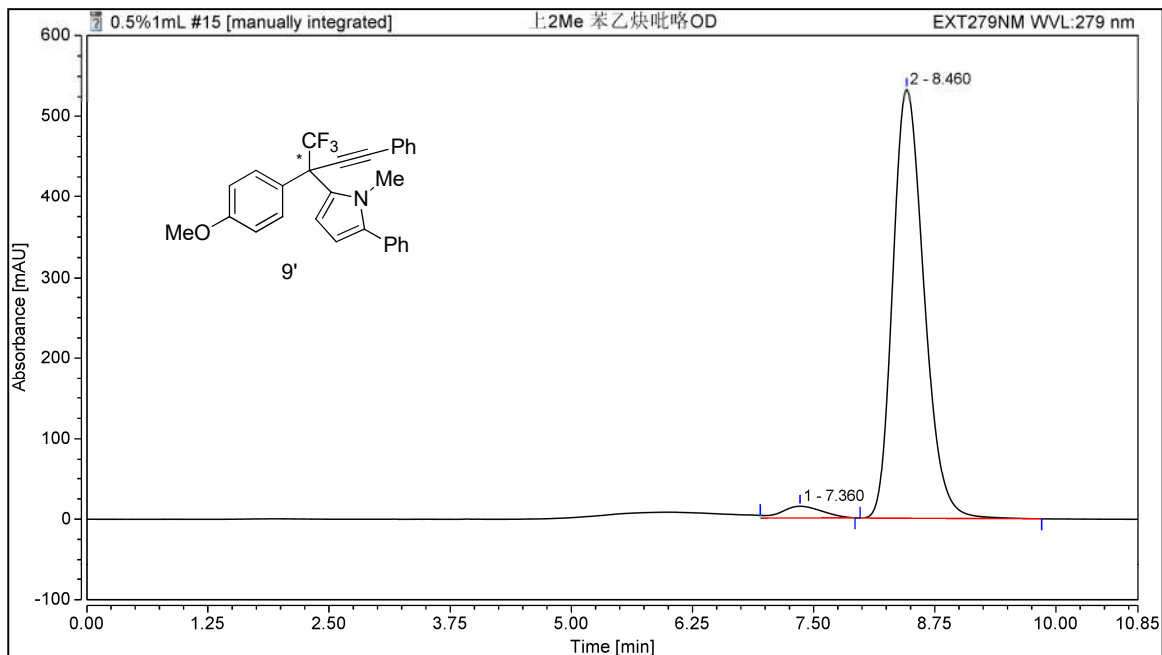

### Integration Results

| No.           | Peak Name | Retention Time<br>min | Area<br>mAU*min | Relative Area<br>% | Amount<br>n.a. |
|---------------|-----------|-----------------------|-----------------|--------------------|----------------|
| 1             |           | 7.360                 | 7.121           | 3.46               | n.a.           |
| 2             |           | 8.460                 | 198.494         | 96.54              | n.a.           |
| <b>Total:</b> |           |                       | <b>205.616</b>  | <b>100.00</b>      |                |

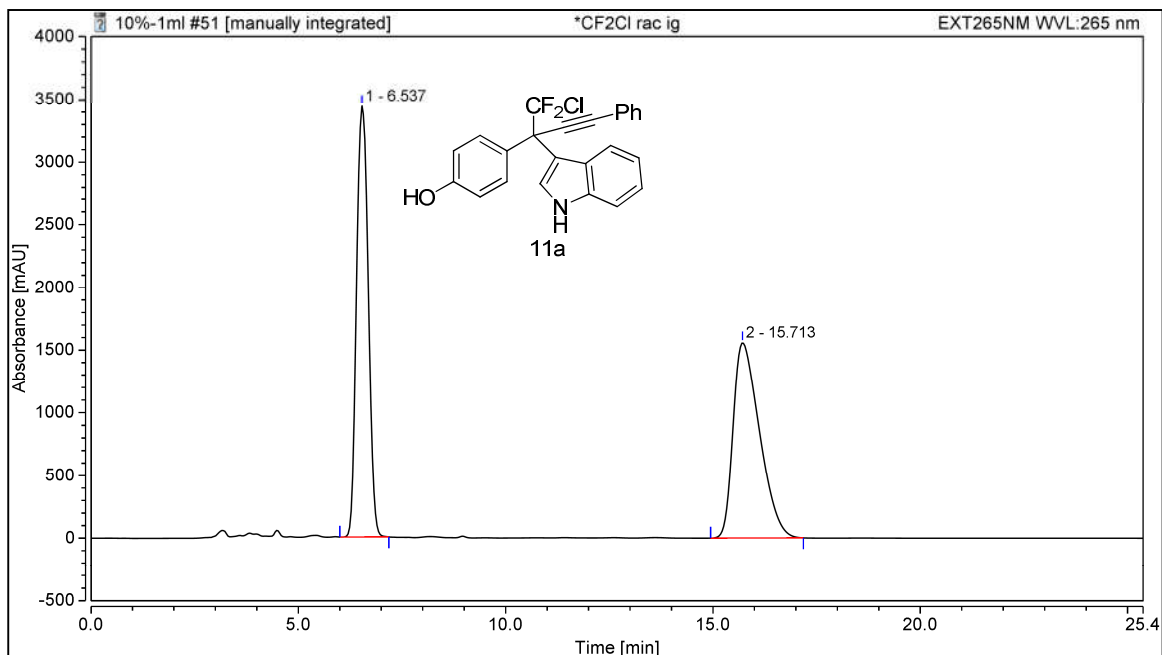

### Integration Results

| No.           | Peak Name | Retention Time<br>min | Area<br>mAU*min | Relative Area<br>% | Amount<br>n.a. |
|---------------|-----------|-----------------------|-----------------|--------------------|----------------|
| 1             |           | 6.537                 | 1128.852        | 49.58              | n.a.           |
| 2             |           | 15.713                | 1148.016        | 50.42              | n.a.           |
| <b>Total:</b> |           |                       | <b>2276.868</b> | <b>100.00</b>      |                |

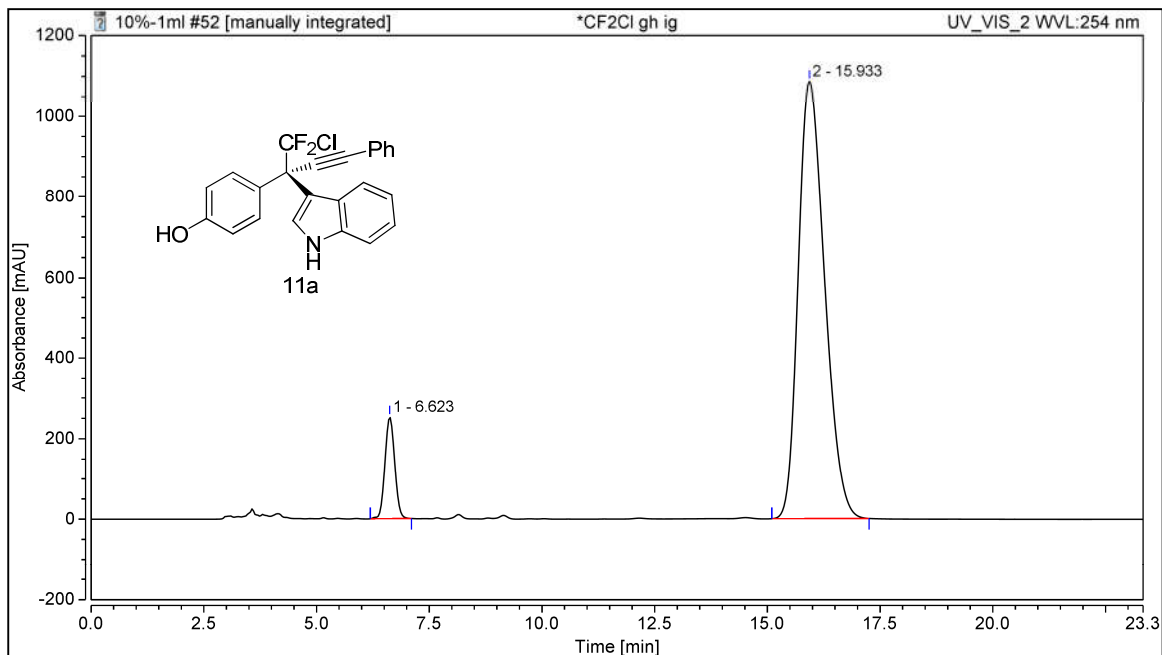

### Integration Results

| No.           | Peak Name | Retention Time<br>min | Area<br>mAU*min | Relative Area<br>% | Amount<br>n.a. |
|---------------|-----------|-----------------------|-----------------|--------------------|----------------|
| 1             |           | 6.623                 | 63.351          | 7.93               | n.a.           |
| 2             |           | 15.933                | 735.133         | 92.07              | n.a.           |
| <b>Total:</b> |           |                       | <b>798.484</b>  | <b>100.00</b>      |                |



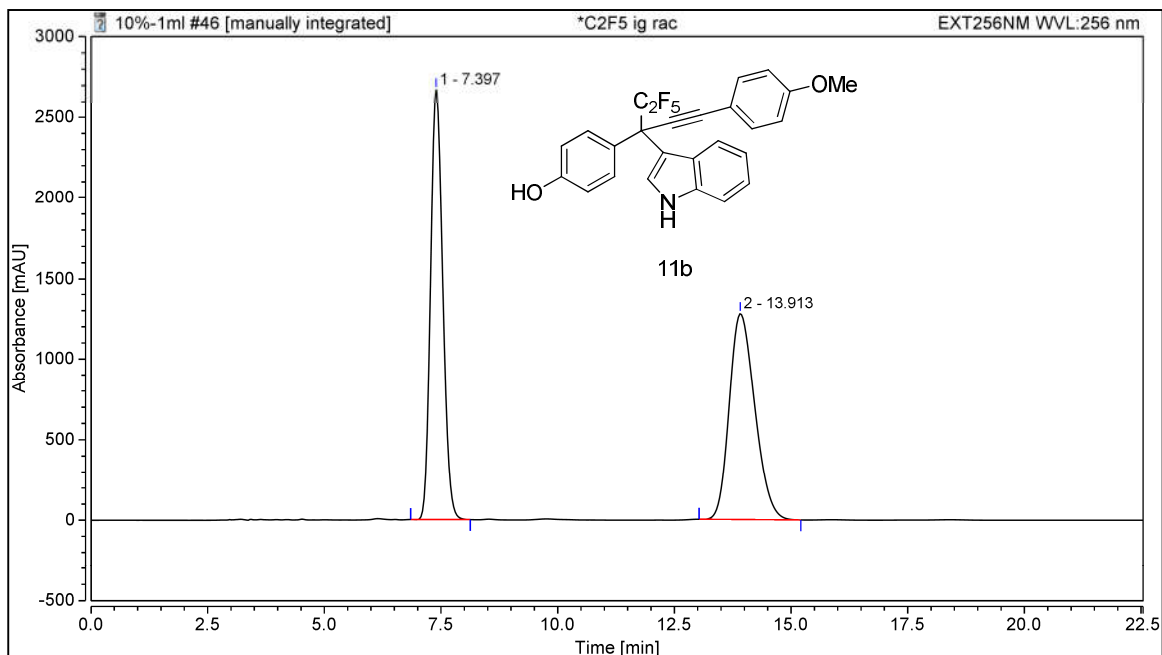

### Integration Results

| No.           | Peak Name | Retention Time<br>min | Area<br>mAU*min | Relative Area<br>% | Amount<br>n.a. |
|---------------|-----------|-----------------------|-----------------|--------------------|----------------|
| 1             |           | 7.397                 | 780.637         | 49.99              | n.a.           |
| 2             |           | 13.913                | 780.893         | 50.01              | n.a.           |
| <b>Total:</b> |           |                       | <b>1561.530</b> | <b>100.00</b>      |                |

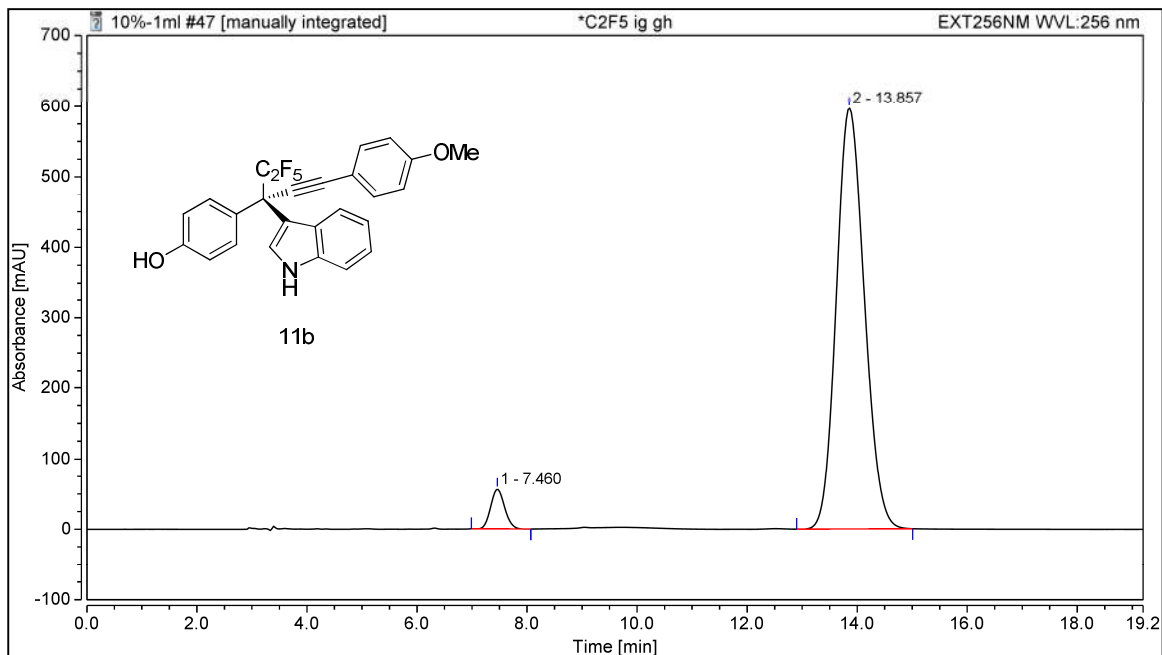

### Integration Results

| No.           | Peak Name | Retention Time<br>min | Area<br>mAU*min | Relative Area<br>% | Amount<br>n.a. |
|---------------|-----------|-----------------------|-----------------|--------------------|----------------|
| 1             |           | 7.460                 | 16.358          | 4.44               | n.a.           |
| 2             |           | 13.857                | 352.246         | 95.56              | n.a.           |
| <b>Total:</b> |           |                       | <b>368.604</b>  | <b>100.00</b>      |                |

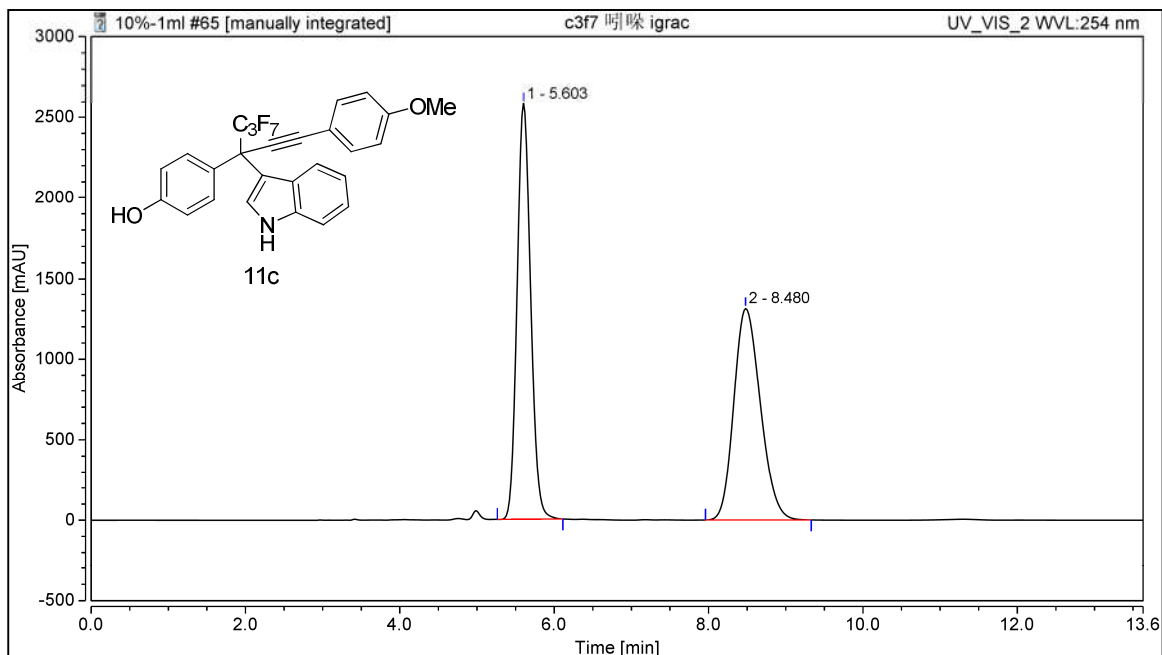

### Integration Results

| No.           | Peak Name | Retention Time<br>min | Area<br>mAU*min | Relative Area<br>% | Amount<br>n.a. |
|---------------|-----------|-----------------------|-----------------|--------------------|----------------|
| 1             |           | 5.603                 | 525.001         | 50.11              | n.a.           |
| 2             |           | 8.480                 | 522.746         | 49.89              | n.a.           |
| <b>Total:</b> |           |                       | <b>1047.746</b> | <b>100.00</b>      |                |

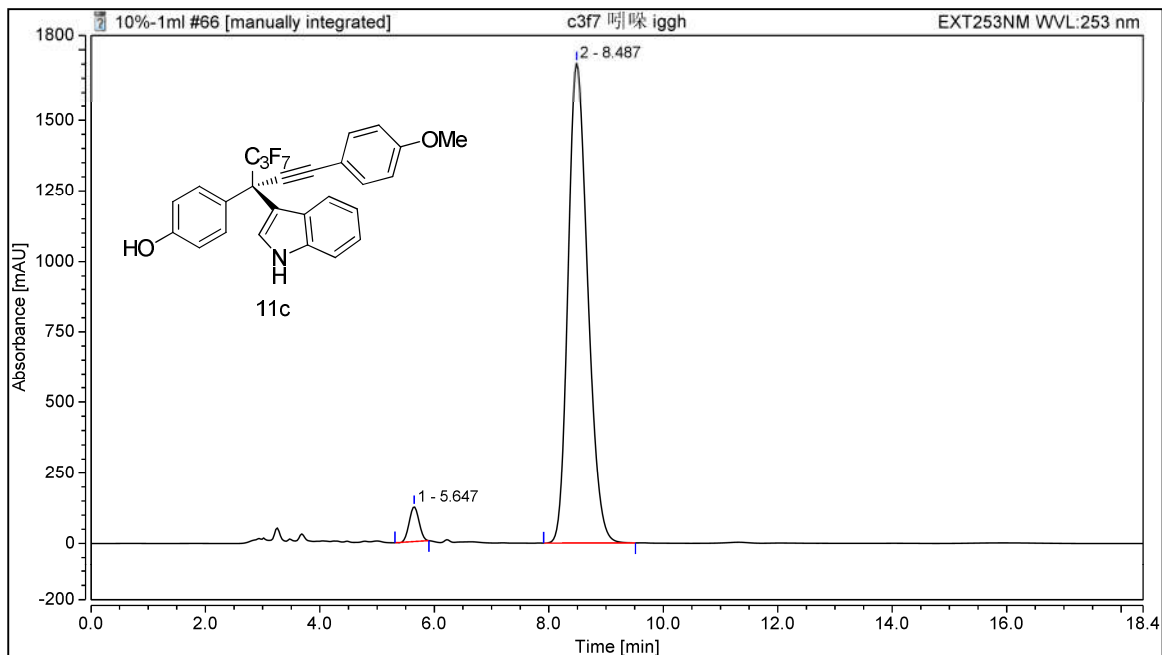

### Integration Results

| No.           | Peak Name | Retention Time<br>min | Area<br>mAU*min | Relative Area<br>% | Amount<br>n.a. |
|---------------|-----------|-----------------------|-----------------|--------------------|----------------|
| 1             |           | 5.647                 | 24.501          | 3.50               | n.a.           |
| 2             |           | 8.487                 | 676.027         | 96.50              | n.a.           |
| <b>Total:</b> |           |                       | <b>700.528</b>  | <b>100.00</b>      |                |

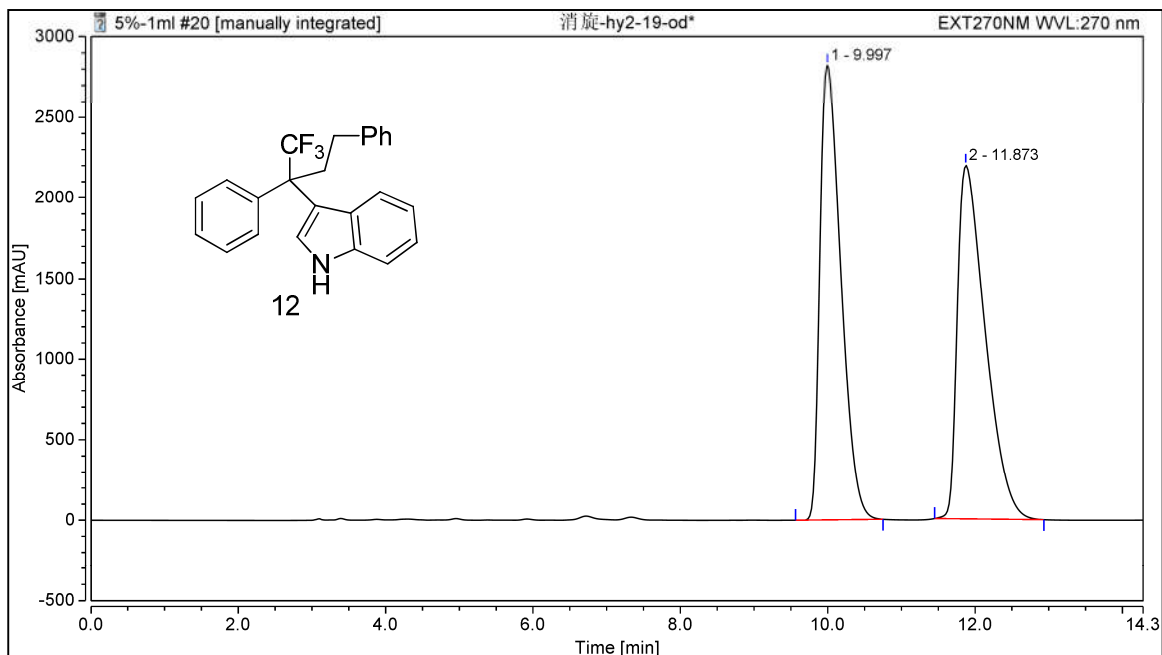

### Integration Results

| No.           | Peak Name | Retention Time<br>min | Area<br>mAU*min | Relative Area<br>% | Amount<br>n.a. |
|---------------|-----------|-----------------------|-----------------|--------------------|----------------|
| 1             |           | 9.997                 | 930.889         | 49.24              | n.a.           |
| 2             |           | 11.873                | 959.503         | 50.76              | n.a.           |
| <b>Total:</b> |           |                       | <b>1890.392</b> | <b>100.00</b>      |                |

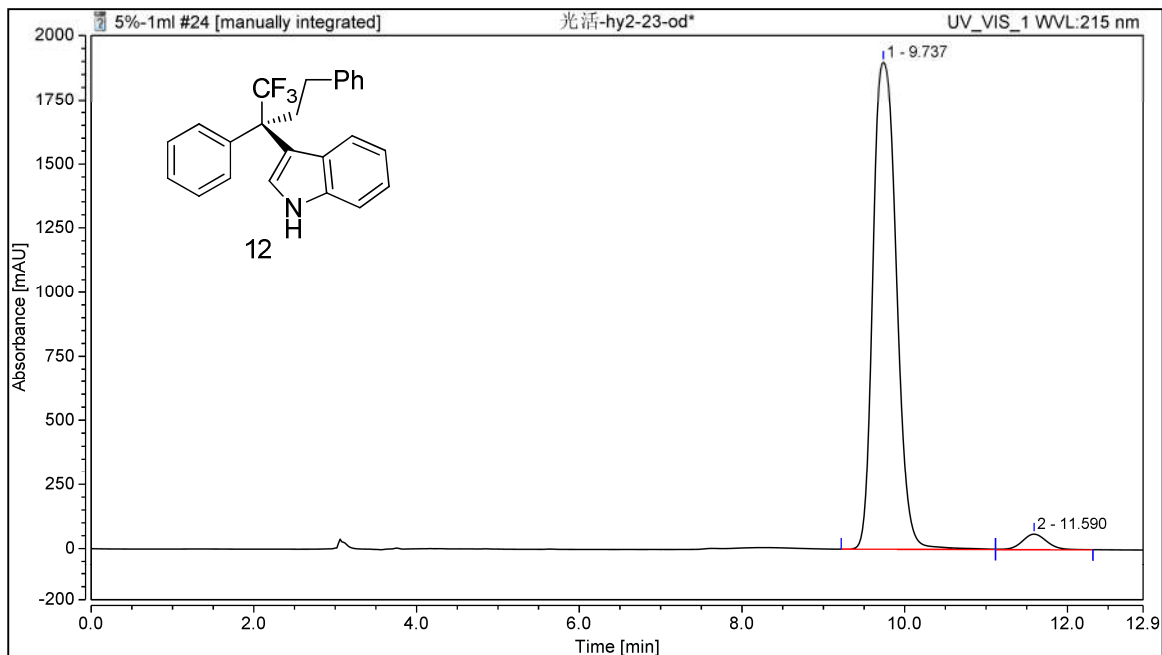

### Integration Results

| No.           | Peak Name | Retention Time<br>min | Area<br>mAU*min | Relative Area<br>% | Amount<br>n.a. |
|---------------|-----------|-----------------------|-----------------|--------------------|----------------|
| 1             |           | 9.737                 | 633.937         | 96.68              | n.a.           |
| 2             |           | 11.590                | 21.793          | 3.32               | n.a.           |
| <b>Total:</b> |           |                       | <b>655.730</b>  | <b>100.00</b>      |                |

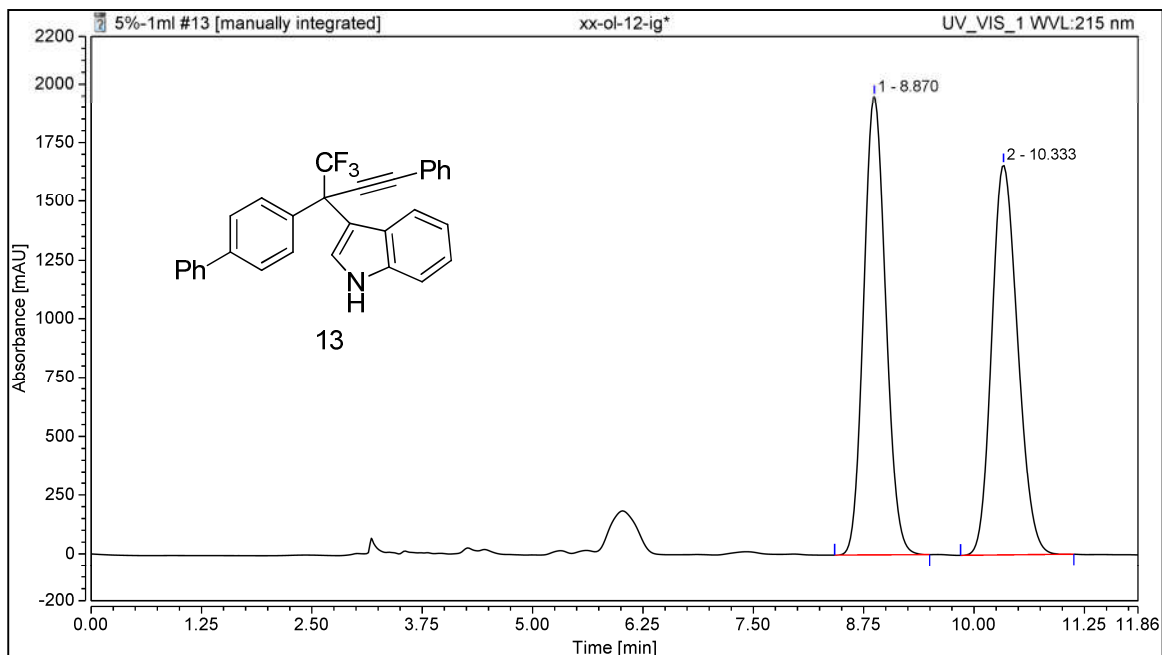

### Integration Results

| No.           | Peak Name | Retention Time<br>min | Area<br>mAU*min | Relative Area<br>% | Amount<br>n.a. |
|---------------|-----------|-----------------------|-----------------|--------------------|----------------|
| 1             |           | 8.870                 | 563.779         | 49.94              | n.a.           |
| 2             |           | 10.333                | 565.087         | 50.06              | n.a.           |
| <b>Total:</b> |           |                       | <b>1128.867</b> | <b>100.00</b>      |                |

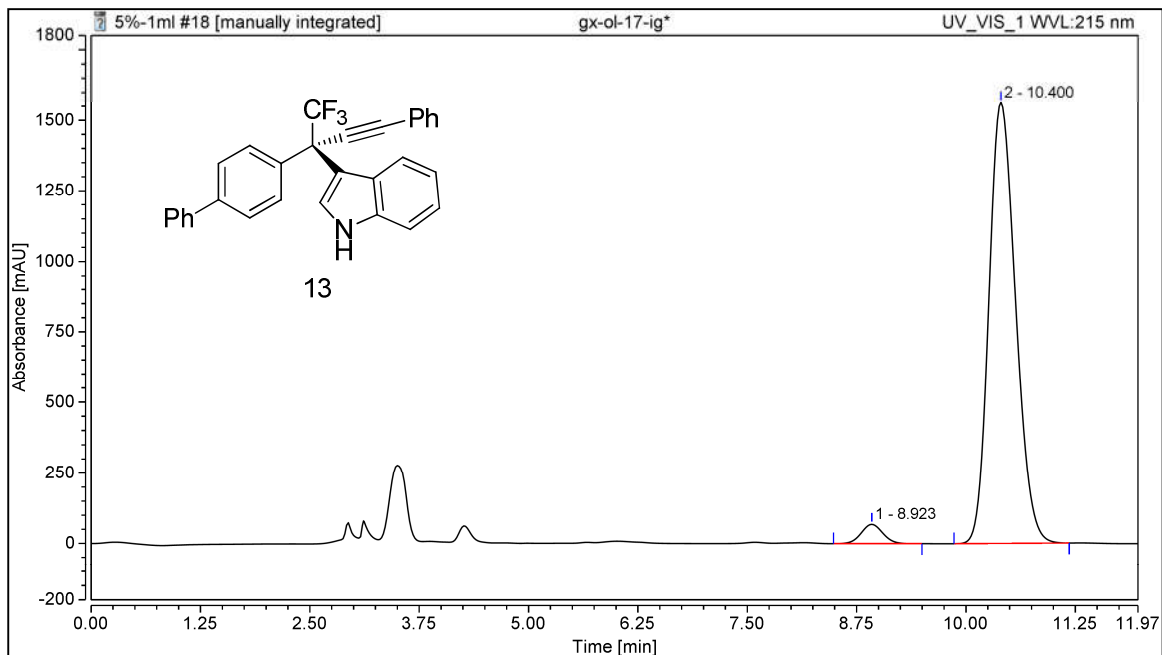

### Integration Results

| No.           | Peak Name | Retention Time<br>min | Area<br>mAU*min | Relative Area<br>% | Amount<br>n.a. |
|---------------|-----------|-----------------------|-----------------|--------------------|----------------|
| 1             |           | 8.923                 | 19.510          | 3.42               | n.a.           |
| 2             |           | 10.400                | 551.122         | 96.58              | n.a.           |
| <b>Total:</b> |           |                       | <b>570.632</b>  | <b>100.00</b>      |                |

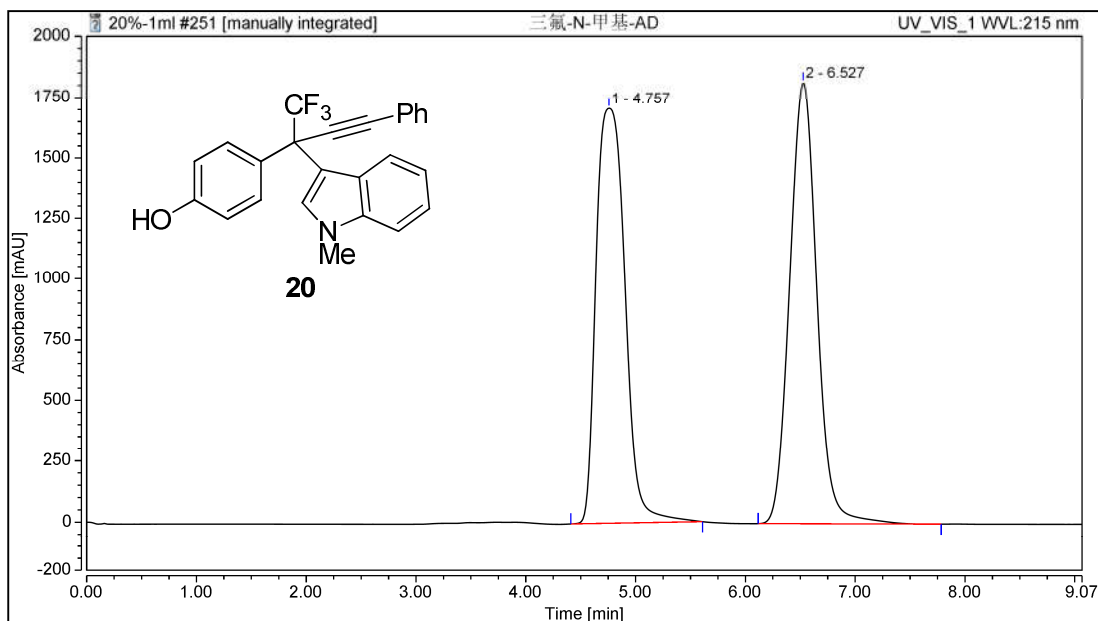

### Integration Results

| No.           | Peak Name | Retention Time<br>min | Area<br>mAU*min | Relative Area<br>% | Amount<br>n.a. |
|---------------|-----------|-----------------------|-----------------|--------------------|----------------|
| 1             |           | 4.757                 | 519.650         | 49.98              | n.a.           |
| 2             |           | 6.527                 | 520.012         | 50.02              | n.a.           |
| <b>Total:</b> |           |                       | <b>1039.663</b> | <b>100.00</b>      |                |

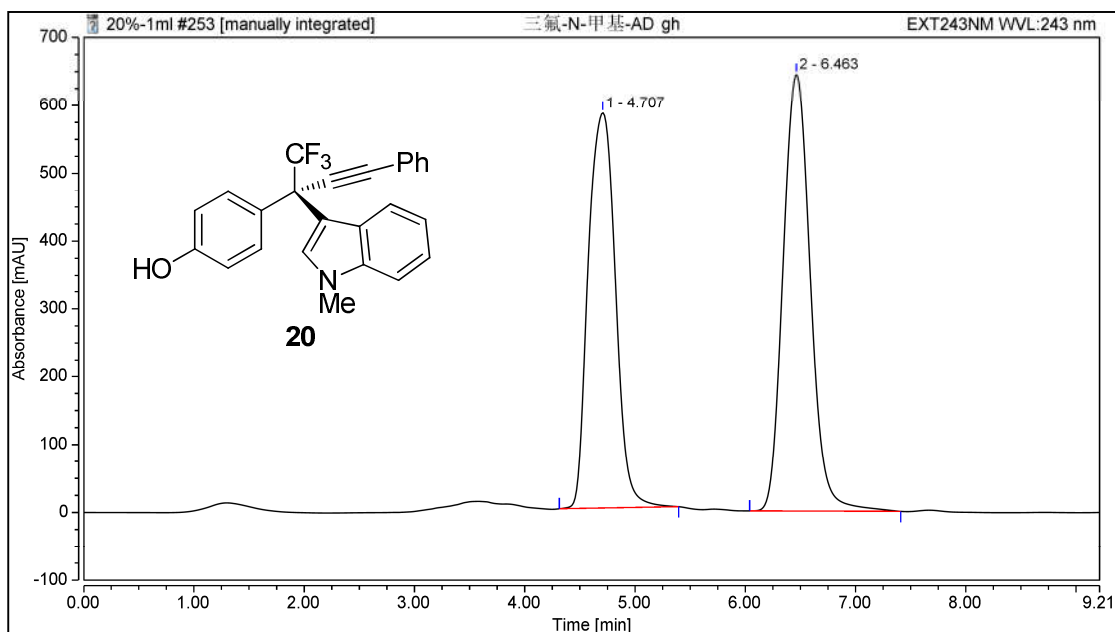

### Integration Results

| No.           | Peak Name | Retention Time<br>min | Area<br>mAU*min | Relative Area<br>% | Amount<br>n.a. |
|---------------|-----------|-----------------------|-----------------|--------------------|----------------|
| 1             |           | 4.707                 | 166.529         | 47.45              | n.a.           |
| 2             |           | 6.463                 | 184.445         | 52.55              | n.a.           |
| <b>Total:</b> |           |                       | <b>350.974</b>  | <b>100.00</b>      |                |
